# Supplementary material for: Soil and forest floor carbon balance in drained and undrained hemiboreal peatland forests
Source: Copernicus journal article supplement (doi:10.5194/egusphere-2024-1397), 2024-05-24
Supplement: Supplementary file 1 [file Annex_Soil and forest floor C balance in drained and undrained hemiboreal peatland forests.xlsx]

## Sheet: GLOSSARY
Table	Column	Parameter	Unit
total_respiation	site	site name	-
total_respiation	plot	plot identifier	-
total_respiation	subplot	subplot identifier	-
total_respiation	date	sampling date	yyyy-mm-dd
total_respiation	repliate_id	sampling point identifier
total_respiation	co2_rtot	total soil respiration	mg CO2-C m2 h-1
environmental_parameters	site	site name	-
environmental_parameters	plot	plot identifier	-
environmental_parameters	subplot	subplot identifier	-
environmental_parameters	date	sampling date	yyyy-mm-dd
environmental_parameters	air_temp	air temperature	C
environmental_parameters	soil_temp_5	soil temperature at 5 cm depth	C
environmental_parameters	soil_temp_10	soil temperature at 10 cm depth	C
environmental_parameters	soil_temp_15	soil temperature at 15 cm depth	C
environmental_parameters	soil_temp_20	soil temperature at 20 cm depth	C
environmental_parameters	soil_temp_30	soil temperature at 30 cm depth	C
environmental_parameters	soil_temp_40	soil temperature at 40 cm depth	C
environmental_parameters	moisture	soil moisture	% (mass/mass)
environmental_parameters	conductivity	soil conductivity	uS cm-1
environmental_parameters	wtl	water table level	cm
environmental_parameters	snow	snow layer thickness	cm
ground_vegetation	site	site name	-
ground_vegetation	plot	plot identifier	-
ground_vegetation	subplot	subplot identifier	-
ground_vegetation	repliate_id	sampling point identifier	-
ground_vegetation	sampling_date	sampling date	yyyy-mm-dd
ground_vegetation	agv	abevground herbacious vegetation biomass	t ha-1
ground_vegetation	bgv	abevground herbaceous vegetation biomass	t ha-1
fine_root_production	site	site name	-
fine_root_production	plot	plot identifier	-
fine_root_production	subplot	subplot identifier	-
fine_root_production	repliate_id	sampling point identifier	-
fine_root_production	installation_date	sampling date	yyyy-mm-dd
fine_root_production	sampling_date	sampling date	yyyy-mm-dd
fine_root_production	frp	tree fine root prodction biomass annualized	t ha-1 year-1
biomass_chemistry	site	site name	-
biomass_chemistry	plot	plot identifier	-
biomass_chemistry	subplot	subplot identifier	-
biomass_chemistry	type	biomass type	-
biomass_chemistry	repliate_id	sampling point identifier	-
biomass_chemistry	year	sampling year	yyyy
biomass_chemistry	C	dry mass carbon content	g/kg
biomass_chemistry	N	dry mass nitrogen content	g/kg
biomass_chemistry	CN	C/N ratio
fine_literfall	site	site name	-
fine_literfall	plot	plot identifier	-
fine_literfall	subplot	subplot identifier	-
fine_literfall	repliate_id	sampling point identifier	-
fine_literfall	year	year of sampling	yyyy
fine_literfall	flf_annual	annualized fooliar litter biomass	t dm ha-1 year-1
Rhet	site	site name	-
Rhet	plot	plot identifier	-
Rhet	subplot	subplot identifier	-
Rhet	replicate_id	sampling point identifier	-
Rhet	co2_rhet	total soil respiration	mg CO2-C m2 h-1
Rhet	date	measuremet date	yyyy-mm-dd
Rhet	start_time	time of measurement start	HH:MM:SS
Rhet	end_time	time of measurement end	HH:MM:SS
Rhet	t05	soil temperature at 5 cm depth	°C
Rhet	t10	soil temperature at 10 cm depth	°C
Rhet	t15	soil temperature at 15 cm depth	°C
Rhet	t20	soil temperature at 20 cm depth	°C
Rhet	t30	soil temperature at 30 cm depth	°C
Rhet	t40	soil temperature at 40 cm depth	°C
Rhet	moisture	soil moisture	% (mass/mass)
Rhet	wtl	water table level	cm

## Sheet: biomass_chemistry
site	plot	subplot	type	replicate_id	year	C	N	CN
LVC104	1	B	fine foliar litter	1	2021	517.505	14.0063	36.9481
LVC104	1	B	fine foliar litter	2	2021	518.463	13.1503	39.426
LVC104	1	B	fine foliar litter	3	2021	512.862	13.4552	38.1161
LVC104	1	B	fine foliar litter	4	2021	511.963	12.2034	41.9527
LVC104	1	B	fine foliar litter	5	2021	511.38	13.7495	37.1926
LVC105	1	B	fine foliar litter	1	2021	522.202	12.0798	43.2293
LVC105	1	B	fine foliar litter	2	2021	513.386	12.5244	40.991
LVC105	1	B	fine foliar litter	3	2021	513.135	12.1499	42.2338
LVC105	1	B	fine foliar litter	4	2021	508.812	12.8026	39.743
LVC105	1	B	fine foliar litter	5	2021	510.705	12.447	41.0304
LVC106	1	B	fine foliar litter	1	2021	518.2	12.5928	41.1505
LVC106	1	B	fine foliar litter	2	2021	511.968	13.0433	39.2514
LVC106	1	B	fine foliar litter	3	2021	512.942	12.6313	40.6086
LVC106	1	B	fine foliar litter	4	2021	513.664	13.2573	38.7458
LVC106	1	B	fine foliar litter	5	2021	526.1	13.1868	39.896
LVC107	1	B	fine foliar litter	1	2021	525.593	14.7582	35.6136
LVC107	1	B	fine foliar litter	2	2021	517.747	15.255	33.9395
LVC107	1	B	fine foliar litter	3	2021	519.939	13.5162	38.4678
LVC107	1	B	fine foliar litter	4	2021	513.815	16.0596	31.9943
LVC107	1	B	fine foliar litter	5	2021	518.589	16.8372	30.8002
LVC108	1	B	fine foliar litter	1	2021	532.861	14.0346	37.9677
LVC108	1	B	fine foliar litter	2	2021	530.302	14.2128	37.3116
LVC108	1	B	fine foliar litter	3	2021	530.458	14.4936	36.5995
LVC108	1	B	fine foliar litter	4	2021	531.522	14.5297	36.5818
LVC108	1	B	fine foliar litter	5	2021	534.885	14.1046	37.9227
LVC109	1	B	fine foliar litter	1	2021	520.421	21.9403	23.7198
LVC109	1	B	fine foliar litter	2	2021	519.286	23.0742	22.505
LVC109	1	B	fine foliar litter	3	2021	520.673	24.705	21.0756
LVC109	1	B	fine foliar litter	4	2021	520.177	24.138	21.5501
LVC109	1	B	fine foliar litter	5	2021	512.023	22.6206	22.6352
LVC110	1	B	fine foliar litter	1	2021	530.404	9.95635	53.273
LVC110	1	B	fine foliar litter	2	2021	526.397	10.0099	52.5879
LVC110	1	B	fine foliar litter	3	2021	539.301	7.8752	68.481
LVC110	1	B	fine foliar litter	4	2021	536.214	7.8752	68.089
LVC110	1	B	fine foliar litter	5	2021	533.465	8.81145	60.5422
LVC111	1	B	fine foliar litter	1	2021	517.298	23.5004	22.0123
LVC111	1	B	fine foliar litter	2	2021	526.312	15.6251	33.6836
LVC111	1	B	fine foliar litter	3	2021	522.29	22.4267	23.2887
LVC111	1	B	fine foliar litter	4	2021	521.243	22.8246	22.8369
LVC111	1	B	fine foliar litter	5	2021	519.28	21.5622	24.0829
LVC112	1	B	fine foliar litter	1	2021	516.861	16.1892	31.9263
LVC112	1	B	fine foliar litter	2	2021	526.349	18.9972	27.7067
LVC112	1	B	fine foliar litter	3	2021	523.395	18.1062	28.9069
LVC112	1	B	fine foliar litter	4	2021	524.702	16.3296	32.1319
LVC112	1	B	fine foliar litter	5	2021	528.574	15.3854	34.3557
LVC115	1	B	fine foliar litter	1	2021	545.459	14.1804	38.4657
LVC115	1	B	fine foliar litter	2	2021	544.763	13.6674	39.8586
LVC115	1	B	fine foliar litter	3	2021	542.33	15.0709	35.9851
LVC115	1	B	fine foliar litter	4	2021	537.289	12.9114	41.6136
LVC115	1	B	fine foliar litter	5	2021	542.854	14.9212	36.3815
LVC116	1	B	fine foliar litter	1	2021	536.257	7.67725	69.8502
LVC116	1	B	fine foliar litter	2	2021	525.236	8.0785	65.0166
LVC116	1	B	fine foliar litter	3	2021	531.212	7.82705	67.8688
LVC116	1	B	fine foliar litter	4	2021	538.424	8.1427	66.1235
LVC116	1	B	fine foliar litter	5	2021	533.967	8.1427	65.5762
LVC308	1	B	fine foliar litter	1	2021	511.011	9.0094	56.7197
LVC308	1	B	fine foliar litter	2	2021	518.503	9.5148	54.4943
LVC308	1	B	fine foliar litter	3	2021	520.036	10.152	51.225
LVC308	1	B	fine foliar litter	4	2021	524.362	10.4706	50.0794
LVC308	1	B	fine foliar litter	5	2021	523.735	9.6984	54.0022
LVC309	1	B	fine foliar litter	1	2021	521.905	10.9728	47.5635
LVC309	1	B	fine foliar litter	2	2021	521.505	11.2806	46.2303
LVC309	1	B	fine foliar litter	3	2021	523.876	11.0376	47.4628
LVC309	1	B	fine foliar litter	4	2021	522.126	11.4534	45.587
LVC309	1	B	fine foliar litter	5	2021	524.853	11.4912	45.6743
LVC311	1	B	fine foliar litter	1	2021	521.057	11.2212	46.435
LVC311	1	B	fine foliar litter	2	2021	525.391	11.6085	45.2592
LVC311	1	B	fine foliar litter	3	2021	519.923	9.9522	52.242
LVC311	1	B	fine foliar litter	4	2021	529.484	10.5839	50.0273
LVC311	1	B	fine foliar litter	5	2021	520.987	9.7794	53.2739
LVC312	1	B	fine foliar litter	1	2021	520.702	10.9505	47.5505
LVC312	1	B	fine foliar litter	2	2021	519.766	11.682	44.4929
LVC312	1	B	fine foliar litter	3	2021	529.276	12.5874	42.0481
LVC312	1	B	fine foliar litter	4	2021	515.686	11.748	43.8956
LVC312	1	B	fine foliar litter	5	2021	518.159	10.2351	50.6257
LVC313	1	B	fine foliar litter	1	2021	529.173	8.2512	64.1329
LVC313	1	B	fine foliar litter	2	2021	530.993	8.8398	60.0684
LVC313	1	B	fine foliar litter	3	2021	535.685	8.4294	63.5496
LVC313	1	B	fine foliar litter	4	2021	536.215	9.0396	59.3184
LVC313	1	B	fine foliar litter	5	2021	534.681	10.0332	53.2912
LVC104	1	B	fine foliar litter	1	2022	513.407	14.0598	36.516
LVC104	1	B	fine foliar litter	2	2022	513.972	14.4936	35.462
LVC104	1	B	fine foliar litter	3	2022	516.842	14.3487	36.0201
LVC104	1	B	fine foliar litter	4	2022	512.573	14.5841	35.146
LVC104	1	B	fine foliar litter	5	2022	514.349	13.1824	39.0179
LVC105	1	B	fine foliar litter	1	2022	524.974	12.198	43.0377
LVC105	1	B	fine foliar litter	2	2022	522.428	13.7174	38.085
LVC105	1	B	fine foliar litter	3	2022	521.893	13.3001	39.2397
LVC105	1	B	fine foliar litter	4	2022	516.104	13.3643	38.6181
LVC105	1	B	fine foliar litter	5	2022	514.534	14.0724	36.5633
LVC106	1	B	fine foliar litter	1	2022	525.992	13.824	38.0492
LVC106	1	B	fine foliar litter	2	2022	534.514	15.0984	35.402
LVC106	1	B	fine foliar litter	3	2022	522.321	15.7611	33.1399
LVC106	1	B	fine foliar litter	4	2022	525.29	12.8628	40.838
LVC106	1	B	fine foliar litter	5	2022	528.002	14.2524	37.0465
LVC107	1	B	fine foliar litter	1	2022	526.74	13.7388	38.3396
LVC107	1	B	fine foliar litter	2	2022	525.28	14.1588	37.0992
LVC107	1	B	fine foliar litter	3	2022	518.746	12.3012	42.1703
LVC107	1	B	fine foliar litter	4	2022	513.859	17.7234	28.9932
LVC107	1	B	fine foliar litter	5	2022	516.931	16.8912	30.6036
LVC108	1	B	fine foliar litter	1	2022	536.945	14.4861	37.0662
LVC108	1	B	fine foliar litter	2	2022	539.605	15.9903	33.7457
LVC108	1	B	fine foliar litter	3	2022	541.806	16.6879	32.467
LVC108	1	B	fine foliar litter	4	2022	470.019	15.5979	30.1335
LVC108	1	B	fine foliar litter	5	2022	536.781	16.5244	32.4842
LVC109	1	B	fine foliar litter	1	2022	522.459	25.397	20.5717
LVC109	1	B	fine foliar litter	2	2022	521.423	21.8218	23.8946
LVC109	1	B	fine foliar litter	3	2022	525.783	21.2223	24.775
LVC109	1	B	fine foliar litter	4	2022	521.064	22.3014	23.3646
LVC109	1	B	fine foliar litter	5	2022	518.262	23.2606	22.2807
LVC110	1	B	fine foliar litter	1	2022	541.613	8.6456	62.646
LVC110	1	B	fine foliar litter	2	2022	535.76	8.2069	65.2816
LVC110	1	B	fine foliar litter	3	2022	534.805	8.4996	62.9212
LVC110	1	B	fine foliar litter	4	2022	528.548	8.346	63.3295
LVC110	1	B	fine foliar litter	5	2022	537.57	10.0008	53.7527
LVC111	1	B	fine foliar litter	1	2022	528.933	25.4842	20.7553
LVC111	1	B	fine foliar litter	2	2022	536.705	25.9529	20.68
LVC111	1	B	fine foliar litter	3	2022	535.271	24.915	21.4839
LVC111	1	B	fine foliar litter	4	2022	532.103	22.748	23.3912
LVC111	1	B	fine foliar litter	5	2022	540.596	24.634	21.9451
LVC115	1	B	fine foliar litter	1	2022	561.557	14.9548	37.5503
LVC115	1	B	fine foliar litter	2	2022	561.383	13.4397	41.7705
LVC115	1	B	fine foliar litter	3	2022	563.345	12.7421	44.2113
LVC115	1	B	fine foliar litter	4	2022	564.289	13.376	42.1867
LVC115	1	B	fine foliar litter	5	2022	561.001	15.6633	35.8163
LVC308	1	B	fine foliar litter	1	2022	553.37	11.124	49.7456
LVC308	1	B	fine foliar litter	2	2022	530.669	10.5948	50.0877
LVC308	1	B	fine foliar litter	3	2022	534.276	9.7848	54.6026
LVC308	1	B	fine foliar litter	4	2022	532.764	10.2708	51.8717
LVC308	1	B	fine foliar litter	5	2022	529.032	8.6001	61.5146
LVC313	1	B	fine foliar litter	1	2022	553.694	6.7176	82.4244
LVC313	1	B	fine foliar litter	2	2022	554.45	7.6248	72.7167
LVC313	1	B	fine foliar litter	3	2022	538.144	6.9978	76.9019
LVC313	1	B	fine foliar litter	4	2022	557.258	7.3224	76.1032
LVC313	1	B	fine foliar litter	5	2022	539.784	7.8624	68.6538
LVC116	1	A	aboveground herbaceous ground vegetation	1	2021	517.055	14.971	34.5371
LVC116	1	A	aboveground herbaceous ground vegetation	2	2021	523.198	16.539	31.6342
LVC116	1	A	aboveground herbaceous ground vegetation	3	2021	517.339	17.8528	28.978
LVC116	1	A	aboveground herbaceous ground vegetation	4	2021	518.759	18.0153	28.7954
LVC116	1	B	aboveground herbaceous ground vegetation	1	2021	513.71	13.9552	36.8114
LVC116	1	B	aboveground herbaceous ground vegetation	2	2021	517.104	14.1792	36.4692
LVC116	1	B	aboveground herbaceous ground vegetation	3	2021	525.585	14.874	35.3358
LVC116	1	B	aboveground herbaceous ground vegetation	4	2021	512.998	14.8296	34.5928
LVC116	1	C	aboveground herbaceous ground vegetation	1	2021	503.973	13.0758	38.5424
LVC116	1	C	aboveground herbaceous ground vegetation	2	2021	517.227	13.2645	38.9933
LVC116	1	C	aboveground herbaceous ground vegetation	3	2021	529.281	15.6621	33.7938
LVC116	1	C	aboveground herbaceous ground vegetation	4	2021	520.083	14.6048	35.6104
LVC104	1	A	aboveground herbaceous ground vegetation	1	2021	507.653	26.5392	19.1284
LVC104	1	A	aboveground herbaceous ground vegetation	2	2021	453.734	39.0208	11.628
LVC104	1	A	aboveground herbaceous ground vegetation	3	2021	492.375	27.6172	17.8286
LVC104	1	A	aboveground herbaceous ground vegetation	4	2021	450.956	41.8	10.7884
LVC104	1	B	aboveground herbaceous ground vegetation	1	2021	497.347	23.1424	21.4907
LVC104	1	B	aboveground herbaceous ground vegetation	2	2021	498.502	22.609	22.0488
LVC104	1	B	aboveground herbaceous ground vegetation	3	2021	470.684	34.9095	13.483
LVC104	1	B	aboveground herbaceous ground vegetation	4	2021	470.462	30.2919	15.531
LVC104	1	C	aboveground herbaceous ground vegetation	1	2021	512.134	27.6792	18.5025
LVC104	1	C	aboveground herbaceous ground vegetation	2	2021	487.749	30.1168	16.1952
LVC104	1	C	aboveground herbaceous ground vegetation	3	2021	506.719	26.4708	19.1425
LVC104	1	C	aboveground herbaceous ground vegetation	4	2021	501.737	27.0978	18.5158
LVC111	1	A	aboveground herbaceous ground vegetation	1	2021	479.598	23.7006	20.2357
LVC111	1	A	aboveground herbaceous ground vegetation	2	2021	485.48	23.2218	20.9062
LVC111	1	A	aboveground herbaceous ground vegetation	3	2021	501.862	21.204	23.6683
LVC111	1	A	aboveground herbaceous ground vegetation	4	2021	463.49	21.7512	21.3087
LVC111	1	B	aboveground herbaceous ground vegetation	1	2021	450.822	30.4752	14.7931
LVC111	1	B	aboveground herbaceous ground vegetation	2	2021	486.887	25.185	19.3324
LVC111	1	B	aboveground herbaceous ground vegetation	3	2021	498.781	24.2144	20.5985
LVC111	1	B	aboveground herbaceous ground vegetation	4	2021	481.378	23.7245	20.2904
LVC111	1	C	aboveground herbaceous ground vegetation	1	2021	489.233	17.9331	27.281
LVC111	1	C	aboveground herbaceous ground vegetation	2	2021	499.126	24.0426	20.7601
LVC111	1	C	aboveground herbaceous ground vegetation	3	2021	484.047	20.6564	23.4333
LVC111	1	C	aboveground herbaceous ground vegetation	4	2021	476.258	19.3458	24.6181
LVC308	1	A	aboveground herbaceous ground vegetation	1	2021	509.146	17.5491	29.0127
LVC308	1	A	aboveground herbaceous ground vegetation	2	2021	511.577	17.3715	29.4492
LVC308	1	A	aboveground herbaceous ground vegetation	3	2021	518.358	17.64	29.3854
LVC308	1	A	aboveground herbaceous ground vegetation	4	2021	513.575	17.7822	28.8814
LVC308	1	B	aboveground herbaceous ground vegetation	1	2021	518.703	13.986	37.0873
LVC308	1	B	aboveground herbaceous ground vegetation	2	2021	508.618	16.478	30.8665
LVC308	1	B	aboveground herbaceous ground vegetation	3	2021	506.349	17.5047	28.9264
LVC308	1	B	aboveground herbaceous ground vegetation	4	2021	508.646	15.1626	33.5461
LVC308	1	C	aboveground herbaceous ground vegetation	1	2021	521.989	15.096	34.5779
LVC308	1	C	aboveground herbaceous ground vegetation	2	2021	514.596	13.542	38
LVC308	1	C	aboveground herbaceous ground vegetation	3	2021	504.14	14.8296	33.9955
LVC308	1	C	aboveground herbaceous ground vegetation	4	2021	510.213	16.83	30.3157
LVC312	1	A	aboveground herbaceous ground vegetation	1	2021	485.061	17.2368	28.141
LVC312	1	A	aboveground herbaceous ground vegetation	2	2021	491.99	17.5674	28.0058
LVC312	1	A	aboveground herbaceous ground vegetation	3	2021	485.527	15.6279	31.068
LVC312	1	A	aboveground herbaceous ground vegetation	4	2021	476.702	15.8539	30.0684
LVC312	1	B	aboveground herbaceous ground vegetation	1	2021	484.205	16.4189	29.4907
LVC312	1	B	aboveground herbaceous ground vegetation	2	2021	485.419	15.3664	31.5897
LVC312	1	B	aboveground herbaceous ground vegetation	3	2021	483.177	18.4077	26.2486
LVC312	1	B	aboveground herbaceous ground vegetation	4	2021	486.216	18.8258	25.8271
LVC312	1	C	aboveground herbaceous ground vegetation	1	2021	497.713	12.1989	40.7998
LVC312	1	C	aboveground herbaceous ground vegetation	2	2021	489.283	14.5824	33.553
LVC312	1	C	aboveground herbaceous ground vegetation	3	2021	487.771	14.3136	34.0775
LVC312	1	C	aboveground herbaceous ground vegetation	4	2021	488.589	18.0913	27.0069
LVC112	1	C	aboveground herbaceous ground vegetation	1	2021	514.885	20.6127	24.979
LVC112	1	C	aboveground herbaceous ground vegetation	2	2021	474.725	32.2011	14.7425
LVC112	1	C	aboveground herbaceous ground vegetation	3	2021	528.826	21.0345	25.1409
LVC112	1	C	aboveground herbaceous ground vegetation	4	2021	513.331	21.4563	23.9245
LVC112	1	B	aboveground herbaceous ground vegetation	1	2021	514.463	18.1041	28.4169
LVC112	1	B	aboveground herbaceous ground vegetation	2	2021	531.623	20.757	25.6118
LVC112	1	B	aboveground herbaceous ground vegetation	3	2021	520.79	16.4502	31.6586
LVC112	1	B	aboveground herbaceous ground vegetation	4	2021	513.375	15.0516	34.1077
LVC112	1	A	aboveground herbaceous ground vegetation	1	2021	459.657	30.899	14.8761
LVC112	1	A	aboveground herbaceous ground vegetation	2	2021	483.89	31.02	15.5993
LVC112	1	A	aboveground herbaceous ground vegetation	3	2021	482.262	29.92	16.1184
LVC112	1	A	aboveground herbaceous ground vegetation	4	2021	495.049	30.3696	16.3008
LVC107	1	B	aboveground herbaceous ground vegetation	1	2021	516.13	21.84	23.6323
LVC107	1	B	aboveground herbaceous ground vegetation	2	2021	505.838	21.1788	23.8842
LVC107	1	B	aboveground herbaceous ground vegetation	3	2021	508.535	21.2454	23.9363
LVC107	1	B	aboveground herbaceous ground vegetation	4	2021	505.327	20.646	24.4758
LVC107	1	C	aboveground herbaceous ground vegetation	1	2021	477.322	18.6826	25.549
LVC107	1	C	aboveground herbaceous ground vegetation	2	2021	527.571	19.745	26.7192
LVC107	1	C	aboveground herbaceous ground vegetation	3	2021	510.981	20.5465	24.8695
LVC107	1	C	aboveground herbaceous ground vegetation	4	2021	513.414	22.814	22.5043
LVC107	1	A	aboveground herbaceous ground vegetation	1	2021	512.072	22.341	22.9207
LVC107	1	A	aboveground herbaceous ground vegetation	2	2021	505.694	23.9538	21.1112
LVC107	1	A	aboveground herbaceous ground vegetation	3	2021	507.303	22.311	22.7378
LVC107	1	A	aboveground herbaceous ground vegetation	4	2021	385.638	18.392	20.9677
LVC110	1	A	aboveground herbaceous ground vegetation	1	2021	503.762	16.4502	30.6235
LVC110	1	A	aboveground herbaceous ground vegetation	2	2021	493.163	17.105	28.8315
LVC110	1	A	aboveground herbaceous ground vegetation	3	2021	506.216	16.0395	31.5606
LVC110	1	A	aboveground herbaceous ground vegetation	4	2021	520.388	15.268	34.0836
LVC110	1	B	aboveground herbaceous ground vegetation	1	2021	504.713	17.314	29.1506
LVC110	1	B	aboveground herbaceous ground vegetation	2	2021	506.293	17.982	28.1556
LVC110	1	B	aboveground herbaceous ground vegetation	3	2021	513.431	17.7156	28.9818
LVC110	1	B	aboveground herbaceous ground vegetation	4	2021	504.392	19.0064	26.538
LVC110	1	C	aboveground herbaceous ground vegetation	1	2021	507.705	13.541	37.4939
LVC110	1	C	aboveground herbaceous ground vegetation	2	2021	480.091	23.0644	20.8152
LVC110	1	C	aboveground herbaceous ground vegetation	3	2021	500.743	13.209	37.9092
LVC110	1	C	aboveground herbaceous ground vegetation	4	2021	458.465	19.838	23.1104
LVC109	1	A	aboveground herbaceous ground vegetation	1	2021	473.282	21.4896	22.0238
LVC109	1	A	aboveground herbaceous ground vegetation	2	2021	461.23	20.988	21.9759
LVC109	1	A	aboveground herbaceous ground vegetation	3	2021	465.323	18.5814	25.0424
LVC109	1	A	aboveground herbaceous ground vegetation	4	2021	472.054	16.17	29.1932
LVC109	1	B	aboveground herbaceous ground vegetation	1	2021	468.261	27.459	17.0531
LVC109	1	B	aboveground herbaceous ground vegetation	2	2021	393.129	43.6119	9.01425
LVC109	1	B	aboveground herbaceous ground vegetation	3	2021	425.746	34.7648	12.2465
LVC109	1	B	aboveground herbaceous ground vegetation	4	2021	460.141	16.236	28.3408
LVC109	1	C	aboveground herbaceous ground vegetation	1	2021	466.133	31.6848	14.7116
LVC109	1	C	aboveground herbaceous ground vegetation	2	2021	457.709	35.5422	12.8779
LVC109	1	C	aboveground herbaceous ground vegetation	3	2021	478.386	25.2336	18.9583
LVC109	1	C	aboveground herbaceous ground vegetation	4	2021	472.371	29.96	15.7667
LVC309	1	A	aboveground herbaceous ground vegetation	1	2021	503.685	16.2615	30.9741
LVC309	1	A	aboveground herbaceous ground vegetation	2	2021	506.286	19.041	26.5893
LVC309	1	A	aboveground herbaceous ground vegetation	3	2021	510.356	19.03	26.8185
LVC309	1	A	aboveground herbaceous ground vegetation	4	2021	500.335	16.731	29.9047
LVC309	1	B	aboveground herbaceous ground vegetation	1	2021	572.774	17.9328	31.94
LVC309	1	B	aboveground herbaceous ground vegetation	2	2021	498.124	17.215	28.9355
LVC309	1	B	aboveground herbaceous ground vegetation	3	2021	489.421	19.5138	25.0808
LVC309	1	B	aboveground herbaceous ground vegetation	4	2021	479.487	19.1586	25.0272
LVC309	1	C	aboveground herbaceous ground vegetation	1	2021	501.072	22.154	22.6177
LVC309	1	C	aboveground herbaceous ground vegetation	2	2021	454.845	29.7702	15.2785
LVC309	1	C	aboveground herbaceous ground vegetation	3	2021	475.629	27.214	17.4774
LVC309	1	C	aboveground herbaceous ground vegetation	4	2021	454.367	30.0477	15.1215
LVC108	1	A	aboveground herbaceous ground vegetation	1	2021	462.374	26.741	17.2908
LVC108	1	A	aboveground herbaceous ground vegetation	2	2021	462.748	25.465	18.1719
LVC108	1	A	aboveground herbaceous ground vegetation	3	2021	469.788	23.628	19.8827
LVC108	1	A	aboveground herbaceous ground vegetation	4	2021	471.217	21.3009	22.1219
LVC108	1	B	aboveground herbaceous ground vegetation	1	2021	442.377	38.4007	11.52
LVC108	1	B	aboveground herbaceous ground vegetation	2	2021
LVC108	1	B	aboveground herbaceous ground vegetation	3	2021	468.677	25.652	18.2706
LVC108	1	B	aboveground herbaceous ground vegetation	4	2021	449.504	27.896	16.1136
LVC108	1	C	aboveground herbaceous ground vegetation	1	2021	485.412	26.0034	18.6673
LVC108	1	C	aboveground herbaceous ground vegetation	2	2021	457.756	20.1977	22.6638
LVC108	1	C	aboveground herbaceous ground vegetation	3	2021	433.613	26.0946	16.617
LVC108	1	C	aboveground herbaceous ground vegetation	4	2021
LVC311	1	A	aboveground herbaceous ground vegetation	1	2021	493.04	14.0415	35.113
LVC311	1	A	aboveground herbaceous ground vegetation	2	2021	479.898	16.7888	28.5844
LVC311	1	A	aboveground herbaceous ground vegetation	3	2021	482.428	13.3089	36.2485
LVC311	1	A	aboveground herbaceous ground vegetation	4	2021	474.32	18.2336	26.0135
LVC311	1	B	aboveground herbaceous ground vegetation	1	2021	477.333	19.6803	24.2544
LVC311	1	B	aboveground herbaceous ground vegetation	2	2021	481.275	20.4736	23.5071
LVC311	1	B	aboveground herbaceous ground vegetation	3	2021	489.332	23.0991	21.184
LVC311	1	B	aboveground herbaceous ground vegetation	4	2021	480.386	24.6087	19.521
LVC311	1	C	aboveground herbaceous ground vegetation	1	2021	484.182	21.4119	22.6128
LVC311	1	C	aboveground herbaceous ground vegetation	2	2021	481.329	22.5552	21.3401
LVC311	1	C	aboveground herbaceous ground vegetation	3	2021	479.009	20.868	22.9543
LVC311	1	C	aboveground herbaceous ground vegetation	4	2021	481.773	18.6036	25.8968
LVC115	1	B	aboveground herbaceous ground vegetation	1	2021	500.048	19.7835	25.276
LVC115	1	B	aboveground herbaceous ground vegetation	2	2021	509.003	24.97	20.3846
LVC115	1	B	aboveground herbaceous ground vegetation	3	2021	503.733	22.8682	22.0276
LVC115	1	B	aboveground herbaceous ground vegetation	4	2021	519.824	24.3867	21.3159
LVC106	1	B	aboveground herbaceous ground vegetation	1	2021	488.944	21.6117	22.624
LVC106	1	B	aboveground herbaceous ground vegetation	2	2021	491.686	30.2697	16.2435
LVC106	1	B	aboveground herbaceous ground vegetation	3	2021	487.377	27.533	17.7016
LVC106	1	B	aboveground herbaceous ground vegetation	4	2021	489.899	24.4866	20.0068
LVC105	1	A	aboveground herbaceous ground vegetation	1	2021	502.92	19.91	25.2597
LVC105	1	A	aboveground herbaceous ground vegetation	2	2021	506.338	19.9356	25.3987
LVC105	1	A	aboveground herbaceous ground vegetation	3	2021	498.512	22.3554	22.2994
LVC105	1	A	aboveground herbaceous ground vegetation	4	2021	504.394	20.471	24.6394
LVC106	1	C	aboveground herbaceous ground vegetation	1	2021	488.755	28.4604	17.1732
LVC106	1	C	aboveground herbaceous ground vegetation	2	2021	486.497	29.469	16.5088
LVC106	1	C	aboveground herbaceous ground vegetation	3	2021	504.196	23.386	21.5597
LVC106	1	C	aboveground herbaceous ground vegetation	4	2021	474.254	33.803	14.0299
LVC115	1	C	aboveground herbaceous ground vegetation	1	2021	485.353	25.608	18.9532
LVC115	1	C	aboveground herbaceous ground vegetation	2	2021	476.058	30.206	15.7604
LVC115	1	C	aboveground herbaceous ground vegetation	3	2021	490.347	28.094	17.4538
LVC115	1	C	aboveground herbaceous ground vegetation	4	2021	505.172	27.0618	18.6674
LVC105	1	C	aboveground herbaceous ground vegetation	1	2021	489.954	25.8741	18.9361
LVC105	1	C	aboveground herbaceous ground vegetation	2	2021	502.719	27.5946	18.218
LVC105	1	C	aboveground herbaceous ground vegetation	3	2021	491.586	23.2656	21.1293
LVC105	1	C	aboveground herbaceous ground vegetation	4	2021	508.646	25.1526	20.2224
LVC115	1	A	aboveground herbaceous ground vegetation	1	2021	439.673	40.1665	10.9463
LVC115	1	A	aboveground herbaceous ground vegetation	2	2021	478.478	31.372	15.2518
LVC115	1	A	aboveground herbaceous ground vegetation	3	2021	483.667	25.9848	18.6135
LVC115	1	A	aboveground herbaceous ground vegetation	4	2021	469.321	25.6368	18.3065
LVC105	1	B	aboveground herbaceous ground vegetation	1	2021	499.787	25.0482	19.953
LVC105	1	B	aboveground herbaceous ground vegetation	2	2021	496.111	30.371	16.335
LVC105	1	B	aboveground herbaceous ground vegetation	3	2021	496.359	31.0467	15.9875
LVC105	1	B	aboveground herbaceous ground vegetation	4	2021	496.825	31.4463	15.7992
LVC106	1	A	aboveground herbaceous ground vegetation	1	2021	499.158	25.476	19.5933
LVC106	1	A	aboveground herbaceous ground vegetation	2	2021	511.896	24.167	21.1816
LVC106	1	A	aboveground herbaceous ground vegetation	3	2021	497.992	29.216	17.0452
LVC106	1	A	aboveground herbaceous ground vegetation	4	2021	504.617	24.198	20.8537
LVC313	1	A	aboveground herbaceous ground vegetation	1	2021	526.012	13.3961	39.2661
LVC313	1	A	aboveground herbaceous ground vegetation	2	2021	526.9	10.3572	50.8728
LVC313	1	A	aboveground herbaceous ground vegetation	3	2021	519.253	11.9988	43.2754
LVC313	1	A	aboveground herbaceous ground vegetation	4	2021	523.174	12.6252	41.4388
LVC313	1	B	aboveground herbaceous ground vegetation	1	2021	521.323	13.86	37.6135
LVC313	1	B	aboveground herbaceous ground vegetation	2	2021	528.242	15.895	33.2332
LVC313	1	B	aboveground herbaceous ground vegetation	3	2021	512.787	13.64	37.5944
LVC313	1	B	aboveground herbaceous ground vegetation	4	2021	527.148	14.0832	37.431
LVC313	1	C	aboveground herbaceous ground vegetation	1	2021	518.012	14.432	35.8933
LVC313	1	C	aboveground herbaceous ground vegetation	2	2021	516.043	13.134	39.2906
LVC313	1	C	aboveground herbaceous ground vegetation	3	2021	530.121	14.5515	36.4307
LVC313	1	C	aboveground herbaceous ground vegetation	4	2021	527.713	14.1918	37.1843
LVC116	1	A	belowground herbaceous ground vegetation	1	2021	512.957	12.4632	41.1577
LVC116	1	A	belowground herbaceous ground vegetation	2	2021	521.129	9.8318	53.0044
LVC116	1	A	belowground herbaceous ground vegetation	3	2021	522.677	10.7474	48.6329
LVC116	1	A	belowground herbaceous ground vegetation	4	2021	521.802	10.7136	48.7046
LVC116	1	B	belowground herbaceous ground vegetation	1	2021	526.481	9.4503	55.7105
LVC116	1	B	belowground herbaceous ground vegetation	2	2021	523.156	10.7583	48.6282
LVC116	1	B	belowground herbaceous ground vegetation	3	2021	525.772	9.7446	53.9553
LVC116	1	B	belowground herbaceous ground vegetation	4	2021	523.282	9.1584	57.1368
LVC116	1	C	belowground herbaceous ground vegetation	1	2021	527.658	10.464	50.426
LVC116	1	C	belowground herbaceous ground vegetation	2	2021	534.187	10.573	50.5237
LVC116	1	C	belowground herbaceous ground vegetation	3	2021	530.334	9.4284	56.2486
LVC116	1	C	belowground herbaceous ground vegetation	4	2021	530.863	11.4559	46.3397
LVC104	1	A	belowground herbaceous ground vegetation	1	2021	518.023	20.8081	24.8952
LVC104	1	A	belowground herbaceous ground vegetation	2	2021	504.91	19.947	25.3126
LVC104	1	A	belowground herbaceous ground vegetation	3	2021	512.752	19.926	25.7328
LVC104	1	A	belowground herbaceous ground vegetation	4	2021	496.942	20.7972	23.8947
LVC104	1	B	belowground herbaceous ground vegetation	1	2021	497.299	18.425	26.9904
LVC104	1	B	belowground herbaceous ground vegetation	2	2021	500.852	16.357	30.62
LVC104	1	B	belowground herbaceous ground vegetation	3	2021	483.592	22.8312	21.1812
LVC104	1	B	belowground herbaceous ground vegetation	4	2021	482.069	21.0276	22.9255
LVC104	1	C	belowground herbaceous ground vegetation	1	2021	512.233	18.306	27.9817
LVC104	1	C	belowground herbaceous ground vegetation	2	2021	481.596	17.5052	27.5116
LVC104	1	C	belowground herbaceous ground vegetation	3	2021	481.511	21.0683	22.8547
LVC104	1	C	belowground herbaceous ground vegetation	4	2021	502.589	17.4204	28.8506
LVC111	1	A	belowground herbaceous ground vegetation	1	2021	514.011	17.4727	29.418
LVC111	1	A	belowground herbaceous ground vegetation	2	2021	498.432	17.094	29.1583
LVC111	1	A	belowground herbaceous ground vegetation	3	2021	497.08	13.6419	36.4378
LVC111	1	A	belowground herbaceous ground vegetation	4	2021	503.811	12.21	41.2622
LVC111	1	B	belowground herbaceous ground vegetation	1	2021	488.356	18.029	27.0872
LVC111	1	B	belowground herbaceous ground vegetation	2	2021	494.153	19.14	25.8178
LVC111	1	B	belowground herbaceous ground vegetation	3	2021	503.668	15.851	31.7752
LVC111	1	B	belowground herbaceous ground vegetation	4	2021	497.409	17.479	28.4575
LVC111	1	C	belowground herbaceous ground vegetation	1	2021	503.675	14.3696	35.0514
LVC111	1	C	belowground herbaceous ground vegetation	2	2021	501.11	16.7127	29.9838
LVC111	1	C	belowground herbaceous ground vegetation	3	2021	510.15	16.0912	31.7037
LVC111	1	C	belowground herbaceous ground vegetation	4	2021	500.528	16.1766	30.9415
LVC308	1	A	belowground herbaceous ground vegetation	1	2021	524.425	10.626	49.353
LVC308	1	A	belowground herbaceous ground vegetation	2	2021	530.772	11.165	47.5389
LVC308	1	A	belowground herbaceous ground vegetation	3	2021	524.942	13.31	39.4397
LVC308	1	A	belowground herbaceous ground vegetation	4	2021	534.265	11.6106	46.0153
LVC308	1	B	belowground herbaceous ground vegetation	1	2021	530.937	10.362	51.2389
LVC308	1	B	belowground herbaceous ground vegetation	2	2021	518.243	10.428	49.6973
LVC308	1	B	belowground herbaceous ground vegetation	3	2021	525.008	11.869	44.2335
LVC308	1	B	belowground herbaceous ground vegetation	4	2021	525.624	8.976	58.5588
LVC308	1	C	belowground herbaceous ground vegetation	1	2021	521.719	11.44	45.6048
LVC308	1	C	belowground herbaceous ground vegetation	2	2021	510.334	13.2867	38.4094
LVC308	1	C	belowground herbaceous ground vegetation	3	2021	545.259	9.262	58.8705
LVC308	1	C	belowground herbaceous ground vegetation	4	2021	524.458	10.659	49.2033
LVC312	1	A	belowground herbaceous ground vegetation	1	2021	509.224	10.5228	48.3924
LVC312	1	A	belowground herbaceous ground vegetation	2	2021	516.294	11.9547	43.1876
LVC312	1	A	belowground herbaceous ground vegetation	3	2021	493.898	13.8992	35.5342
LVC312	1	A	belowground herbaceous ground vegetation	4	2021	484.295	14.5205	33.3525
LVC312	1	B	belowground herbaceous ground vegetation	1	2021	490.65	11.1888	43.8519
LVC312	1	B	belowground herbaceous ground vegetation	2	2021	488.833	11.9769	40.8146
LVC312	1	B	belowground herbaceous ground vegetation	3	2021	483.246	14.2016	34.0276
LVC312	1	B	belowground herbaceous ground vegetation	4	2021	466.289	13.9083	33.5259
LVC312	1	C	belowground herbaceous ground vegetation	1	2021	514.158	12.2976	41.8097
LVC312	1	C	belowground herbaceous ground vegetation	2	2021	512.915	10.0352	51.1116
LVC312	1	C	belowground herbaceous ground vegetation	3	2021	508.088	12.9248	39.3111
LVC312	1	C	belowground herbaceous ground vegetation	4	2021	510.8	9.6348	53.0161
LVC112	1	C	belowground herbaceous ground vegetation	1	2021
LVC112	1	C	belowground herbaceous ground vegetation	2	2021	535.342	12.8427	41.6845
LVC112	1	C	belowground herbaceous ground vegetation	3	2021	514.558	15.543	33.1054
LVC112	1	C	belowground herbaceous ground vegetation	4	2021	512.171	17.578	29.137
LVC112	1	B	belowground herbaceous ground vegetation	1	2021	519.222	17.391	29.8558
LVC112	1	B	belowground herbaceous ground vegetation	2	2021	517.105	17.1051	30.231
LVC112	1	B	belowground herbaceous ground vegetation	3	2021	529.32	15.774	33.5565
LVC112	1	B	belowground herbaceous ground vegetation	4	2021	523.732	14.531	36.0424
LVC112	1	A	belowground herbaceous ground vegetation	1	2021	524.653	17.7876	29.4954
LVC112	1	A	belowground herbaceous ground vegetation	2	2021	521.829	20.999	24.8502
LVC112	1	A	belowground herbaceous ground vegetation	3	2021	510.268	23.188	22.0057
LVC112	1	A	belowground herbaceous ground vegetation	4	2021	523.853	17.919	29.2345
LVC107	1	B	belowground herbaceous ground vegetation	1	2021	522.263	15.6306	33.4128
LVC107	1	B	belowground herbaceous ground vegetation	2	2021	542.678	12.3388	43.9814
LVC107	1	B	belowground herbaceous ground vegetation	3	2021	524.788	19.448	26.9842
LVC107	1	B	belowground herbaceous ground vegetation	4	2021	531.421	16.709	31.8045
LVC107	1	C	belowground herbaceous ground vegetation	1	2021	526.603	15.686	33.5715
LVC107	1	C	belowground herbaceous ground vegetation	2	2021	523.08	15.2818	34.229
LVC107	1	C	belowground herbaceous ground vegetation	3	2021	523.897	13.31	39.3612
LVC107	1	C	belowground herbaceous ground vegetation	4	2021	519.069	12.2625	42.3298
LVC107	1	A	belowground herbaceous ground vegetation	1	2021	518.897	14.2668	36.3709
LVC107	1	A	belowground herbaceous ground vegetation	2	2021	518.84	13.189	39.3388
LVC107	1	A	belowground herbaceous ground vegetation	3	2021	525.936	13.0691	40.2427
LVC107	1	A	belowground herbaceous ground vegetation	4	2021	519.538	14.4861	35.8646
LVC110	1	A	belowground herbaceous ground vegetation	1	2021	523.778	10.5403	49.6929
LVC110	1	A	belowground herbaceous ground vegetation	2	2021	521.892	11.3469	45.9942
LVC110	1	A	belowground herbaceous ground vegetation	3	2021	527.538	9.4067	56.0811
LVC110	1	A	belowground herbaceous ground vegetation	4	2021	523.534	12.452	42.0442
LVC110	1	B	belowground herbaceous ground vegetation	1	2021	528.11	12.144	43.4873
LVC110	1	B	belowground herbaceous ground vegetation	2	2021	531.487	13.827	38.4383
LVC110	1	B	belowground herbaceous ground vegetation	3	2021	518.916	12.9383	40.107
LVC110	1	B	belowground herbaceous ground vegetation	4	2021	529.727	13.497	39.2478
LVC110	1	C	belowground herbaceous ground vegetation	1	2021	514.317	13.8539	37.1243
LVC110	1	C	belowground herbaceous ground vegetation	2	2021	526.285	9.6901	54.3116
LVC110	1	C	belowground herbaceous ground vegetation	3	2021	533.544	9.0688	58.8329
LVC110	1	C	belowground herbaceous ground vegetation	4	2021	495.353	14.0508	35.2544
LVC109	1	A	belowground herbaceous ground vegetation	1	2021	458.508	24.2646	18.8962
LVC109	1	A	belowground herbaceous ground vegetation	2	2021	498.729	14.487	34.426
LVC109	1	A	belowground herbaceous ground vegetation	3	2021	465.068	20.6571	22.5137
LVC109	1	A	belowground herbaceous ground vegetation	4	2021	459.151	22.198	20.6843
LVC109	1	B	belowground herbaceous ground vegetation	1	2021	476.113	19.261	24.719
LVC109	1	B	belowground herbaceous ground vegetation	2	2021	400.859	27.4736	14.5907
LVC109	1	B	belowground herbaceous ground vegetation	3	2021	432.19	27.775	15.5604
LVC109	1	B	belowground herbaceous ground vegetation	4	2021	457.974	19.063	24.0242
LVC109	1	C	belowground herbaceous ground vegetation	1	2021	497.498	23.435	21.2288
LVC109	1	C	belowground herbaceous ground vegetation	2	2021	490.776	24.552	19.9892
LVC109	1	C	belowground herbaceous ground vegetation	3	2021	490.827	26.4985	18.5228
LVC109	1	C	belowground herbaceous ground vegetation	4	2021	495.77	25.938	19.1137
LVC309	1	A	belowground herbaceous ground vegetation	1	2021	490.975	17.8044	27.5761
LVC309	1	A	belowground herbaceous ground vegetation	2	2021	507.417	12.753	39.788
LVC309	1	A	belowground herbaceous ground vegetation	3	2021	508.982	10.1412	50.1896
LVC309	1	A	belowground herbaceous ground vegetation	4	2021	508.038	10.5185	48.2995
LVC309	1	B	belowground herbaceous ground vegetation	1	2021	506.796	12.7203	39.8415
LVC309	1	B	belowground herbaceous ground vegetation	2	2021	505.684	10.682	47.3398
LVC309	1	B	belowground herbaceous ground vegetation	3	2021	507.991	13.464	37.7296
LVC309	1	B	belowground herbaceous ground vegetation	4	2021	508.387	10.714	47.4507
LVC309	1	C	belowground herbaceous ground vegetation	1	2021	508.842	15.6492	32.5155
LVC309	1	C	belowground herbaceous ground vegetation	2	2021	517.803	18.15	28.5291
LVC309	1	C	belowground herbaceous ground vegetation	3	2021	520.421	17.105	30.4251
LVC309	1	C	belowground herbaceous ground vegetation	4	2021	520.19	12.87	40.4188
LVC108	1	A	belowground herbaceous ground vegetation	1	2021	493.138	15.6415	31.5275
LVC108	1	A	belowground herbaceous ground vegetation	2	2021	470.584	15.9729	29.4614
LVC108	1	A	belowground herbaceous ground vegetation	3	2021	508.266	12.309	41.2922
LVC108	1	A	belowground herbaceous ground vegetation	4	2021	502.194	13.992	35.8915
LVC108	1	B	belowground herbaceous ground vegetation	1	2021	508.09	14.949	33.9882
LVC108	1	B	belowground herbaceous ground vegetation	2	2021	516.518	12.535	41.2061
LVC108	1	B	belowground herbaceous ground vegetation	3	2021	497.059	16.0164	31.0344
LVC108	1	B	belowground herbaceous ground vegetation	4	2021	481.91	20.779	23.1922
LVC108	1	C	belowground herbaceous ground vegetation	1	2021	487.476	17.259	28.2447
LVC108	1	C	belowground herbaceous ground vegetation	2	2021	475.508	20.328	23.3918
LVC108	1	C	belowground herbaceous ground vegetation	3	2021	490.086	15.9685	30.6908
LVC108	1	C	belowground herbaceous ground vegetation	4	2021	488.026	16.7751	29.0923
LVC311	1	A	belowground herbaceous ground vegetation	1	2021	511.478	13.068	39.1397
LVC311	1	A	belowground herbaceous ground vegetation	2	2021	476.432	13.035	36.5502
LVC311	1	A	belowground herbaceous ground vegetation	3	2021	491.808	14.606	33.6716
LVC311	1	A	belowground herbaceous ground vegetation	4	2021	502.843	12.815	39.2386
LVC311	1	B	belowground herbaceous ground vegetation	1	2021	511.428	12.3606	41.3757
LVC311	1	B	belowground herbaceous ground vegetation	2	2021	495.627	21.274	23.2973
LVC311	1	B	belowground herbaceous ground vegetation	3	2021	507.804	15.906	31.9253
LVC311	1	B	belowground herbaceous ground vegetation	4	2021	513.815	15.6742	32.7809
LVC311	1	C	belowground herbaceous ground vegetation	1	2021
LVC311	1	C	belowground herbaceous ground vegetation	2	2021	509.041	15.9031	32.0089
LVC311	1	C	belowground herbaceous ground vegetation	3	2021	504.042	17.336	29.0749
LVC311	1	C	belowground herbaceous ground vegetation	4	2021	492.855	17.798	27.6916
LVC115	1	B	belowground herbaceous ground vegetation	1	2021	532.302	12.9819	41.0034
LVC115	1	B	belowground herbaceous ground vegetation	2	2021	530.361	14.8022	35.8299
LVC115	1	B	belowground herbaceous ground vegetation	3	2021	510.774	15.103	33.8194
LVC115	1	B	belowground herbaceous ground vegetation	4	2021	532.857	14.5951	36.5093
LVC106	1	B	belowground herbaceous ground vegetation	1	2021	501.391	19.778	25.3509
LVC106	1	B	belowground herbaceous ground vegetation	2	2021	490.853	20.68	23.7356
LVC106	1	B	belowground herbaceous ground vegetation	3	2021	498.322	18.524	26.9014
LVC106	1	B	belowground herbaceous ground vegetation	4	2021	510.84	18.183	28.0944
LVC105	1	A	belowground herbaceous ground vegetation	1	2021	509.52	20.438	24.93
LVC105	1	A	belowground herbaceous ground vegetation	2	2021	503.58	18.6063	27.065
LVC105	1	A	belowground herbaceous ground vegetation	3	2021	526.273	19.3473	27.2014
LVC105	1	A	belowground herbaceous ground vegetation	4	2021	522	16.7943	31.082
LVC106	1	C	belowground herbaceous ground vegetation	1	2021	495.011	16.302	30.365
LVC106	1	C	belowground herbaceous ground vegetation	2	2021	482.658	19.162	25.1883
LVC106	1	C	belowground herbaceous ground vegetation	3	2021	504.07	17.7452	28.406
LVC106	1	C	belowground herbaceous ground vegetation	4	2021	477.605	23.8165	20.0535
LVC115	1	C	belowground herbaceous ground vegetation	1	2021	507.441	17.193	29.5144
LVC115	1	C	belowground herbaceous ground vegetation	2	2021	491.752	21.3675	23.014
LVC115	1	C	belowground herbaceous ground vegetation	3	2021	510.928	18.183	28.0992
LVC115	1	C	belowground herbaceous ground vegetation	4	2021	515.757	19.591	26.3262
LVC105	1	C	belowground herbaceous ground vegetation	1	2021	500.72	18.007	27.807
LVC105	1	C	belowground herbaceous ground vegetation	2	2021	492.987	21.879	22.5324
LVC105	1	C	belowground herbaceous ground vegetation	3	2021	508.827	18.051	28.1883
LVC105	1	C	belowground herbaceous ground vegetation	4	2021	509.234	19.041	26.7441
LVC115	1	A	belowground herbaceous ground vegetation	1	2021	519.189	17.204	30.1784
LVC115	1	A	belowground herbaceous ground vegetation	2	2021	514.883	17.7234	29.051
LVC115	1	A	belowground herbaceous ground vegetation	3	2021	514.404	19.6963	26.1168
LVC115	1	A	belowground herbaceous ground vegetation	4	2021	509.858	17.8978	28.4872
LVC105	1	B	belowground herbaceous ground vegetation	1	2021	505.384	20.24	24.9696
LVC105	1	B	belowground herbaceous ground vegetation	2	2021	509.971	17.105	29.8141
LVC105	1	B	belowground herbaceous ground vegetation	3	2021	513.074	16.9059	30.3488
LVC105	1	B	belowground herbaceous ground vegetation	4	2021	511.456	17.424	29.3535
LVC106	1	A	belowground herbaceous ground vegetation	1	2021	509.025	16.786	30.3244
LVC106	1	A	belowground herbaceous ground vegetation	2	2021	514.514	19.184	26.82
LVC106	1	A	belowground herbaceous ground vegetation	3	2021	502.986	17.666	28.472
LVC106	1	A	belowground herbaceous ground vegetation	4	2021	520.3	15.719	33.1001
LVC313	1	A	belowground herbaceous ground vegetation	1	2021	534.449	7.3872	72.348
LVC313	1	A	belowground herbaceous ground vegetation	2	2021	533.758	8.5968	62.0879
LVC313	1	A	belowground herbaceous ground vegetation	3	2021	536.149	8.8617	60.5018
LVC313	1	A	belowground herbaceous ground vegetation	4	2021	539.79	9.5593	56.4675
LVC313	1	B	belowground herbaceous ground vegetation	1	2021	539.561	9.6901	55.6817
LVC313	1	B	belowground herbaceous ground vegetation	2	2021	536.356	9.374	57.2174
LVC313	1	B	belowground herbaceous ground vegetation	3	2021	532.462	9.9576	53.4729
LVC313	1	B	belowground herbaceous ground vegetation	4	2021	528.671	8.8668	59.6236
LVC313	1	C	belowground herbaceous ground vegetation	1	2021	534.254	9.288	57.5209
LVC313	1	C	belowground herbaceous ground vegetation	2	2021	541.145	7.8084	69.3029
LVC313	1	C	belowground herbaceous ground vegetation	3	2021	537.316	9.0906	59.1067
LVC313	1	C	belowground herbaceous ground vegetation	4	2021	537.073	7.4304	72.2805
LTC105	1	A	tree fine roots	1	2022	532.158	20.273	26.2496
LTC105	1	A	tree fine roots	2	2022	519.581	15.0202	34.5922
LTC105	1	A	tree fine roots	3	2022	478.72	23.562	20.3175
LTC105	1	B	tree fine roots	1	2022	552.848	11.2052	49.3385
LTC105	1	B	tree fine roots	2	2022	541.64	12.254	44.2011
LTC105	1	B	tree fine roots	3	2022	506.704	12.3552	41.0114
LTC105	1	C	tree fine roots	1	2022	511.283	15.0012	34.0828
LTC105	1	C	tree fine roots	2	2022	530.34	20.1977	26.2574
LTC105	1	C	tree fine roots	3	2022	551.393	15.7398	35.0317
LTC106	1	A	tree fine roots	1	2022	472.685	23.9344	19.7492
LTC106	1	A	tree fine roots	2	2022	474.871	24.4532	19.4196
LTC106	1	A	tree fine roots	3	2022	486.365	21.461	22.6627
LTC106	1	B	tree fine roots	1	2022	481.811	20.328	23.7018
LTC106	1	B	tree fine roots	2	2022	492.174	21.5118	22.8793
LTC106	1	B	tree fine roots	3	2022	483.427	21.201	22.8021
LTC106	1	C	tree fine roots	1	2022	493.737	20.3721	24.236
LTC106	1	C	tree fine roots	2	2022	496.65	23.199	21.4083
LTC106	1	C	tree fine roots	3	2022	507.65	17.765	28.5759
LTC104	1	A	tree fine roots	1	2022	531.696	10.241	51.9184
LTC104	1	A	tree fine roots	2	2022	535.975	10.7559	49.8308
LTC104	1	A	tree fine roots	3	2022	519.32	9.374	55.4
LTC104	1	B	tree fine roots	1	2022	528.462	15.301	34.5377
LTC104	1	B	tree fine roots	2	2022	526.559	13.728	38.3566
LTC104	1	B	tree fine roots	3	2022	526.884	15.6732	33.6169
LTC104	1	C	tree fine roots	1	2022	511.373	10.7365	47.6294
LTC104	1	C	tree fine roots	2	2022	524.919	14.0082	37.4723
LTC104	1	C	tree fine roots	3	2022	528.471	15.6732	33.7181
LTC108	1	A	tree fine roots	1	2022	486.535	18.87	25.7835
LTC108	1	A	tree fine roots	2	2022	483.538	16.544	29.2274
LTC108	1	A	tree fine roots	3	2022	491.165	19.1408	25.6606
LTC108	1	B	tree fine roots	1	2022	469.806	11.6256	40.4114
LTC108	1	B	tree fine roots	2	2022	484.734	11.4232	42.4342
LTC108	1	B	tree fine roots	3	2022	451.427	16.7328	26.9786
LTC108	1	C	tree fine roots	1	2022	489.918	12.518	39.1371
LTC108	1	C	tree fine roots	2	2022	416.981	22.3514	18.6557
LTC108	1	C	tree fine roots	3	2022	459.032	17.4078	26.3694
LTC109	1	A	tree fine roots	1	2022	514.008	19.5249	26.3258
LTC109	1	A	tree fine roots	2	2022	533.299	15.5844	34.2201
LTC109	1	A	tree fine roots	3	2022	489.033	15.1515	32.2762
LTC109	1	B	tree fine roots	1	2022	514.663	16.5168	31.1599
LTC109	1	B	tree fine roots	2	2022	528.771	15.5178	34.0751
LTC109	1	B	tree fine roots	3	2022	479.797	17.248	27.8175
LTC109	1	C	tree fine roots	1	2022	522.555	16.181	32.2944
LTC109	1	C	tree fine roots	2	2022	515.928	18.9588	27.2131
LTC109	1	C	tree fine roots	3	2022	478.173	14.6496	32.6407

## Sheet: enironmental_parameters
site	plot	subplot	date	air_temp	soil_temp_5	soil_temp_10	soil_temp_15	soil_temp_20	soil_temp_30	soil_temp_40	conductivity	moisture	wtl	snow
LVC104	1	A	2021-01-11	-2.4	1.2	1		1.3	3.5	4.5		35.1	-83
LVC104	1	B	2021-01-11	-2.4	0.3	1.7		2.4	2.9	3.1		31	-81
LVC104	1	C	2021-01-11	-2.4	0.5	1.6		2.2	3.1	3.4		37.7	-85
LVC104	1	A	2021-02-04	-6.9	-1.4	0.4		1.1	2.6	3.2		22.9	-80	18
LVC104	1	B	2021-02-04	-6.9	-2.3	0.7		1.1	3	3.6		32	-85	18
LVC104	1	C	2021-02-04	-6.9	-1	1.2		1.7	3.6	4.2		40	-86	17
LVC104	1	A	2021-03-08	-3.7	-0.2	-0.1		0.4	1.6	2.5		12.8	-59	1
LVC104	1	B	2021-03-08	-3.7	-0.5	-0.2		0.2	1.8	2.6		11.4	-68	1.5
LVC104	1	C	2021-03-08	-3.7	-0.8	-0.1		1.1	2.5	3.4		22.4	-67	2
LVC104	1	A	2021-04-07	2.1		1.6		1.7	2.8	3		34.5	-65	0
LVC104	1	B	2021-04-07	2.1		1.7		1.9	3.3	3.5		54	-73	0
LVC104	1	C	2021-04-07	2.1		2.2		2	3.6	3.8		53.9	-68	0
LVC104	1	A	2021-05-10	11.1		7		7.1	5.5	5.4		38.5	-56	0
LVC104	1	B	2021-05-10	11.1		6.6		6.8	5.5	5.5		52	-66	0
LVC104	1	C	2021-05-10	11.1		7.2		7.3	5.7	5.8		34	-64	0
LVC104	1	A	2021-06-07	22.9		13.2		11.9	10.3	10		22.7	-75	0
LVC104	1	B	2021-06-07	22.9		12.7		11.4	9.8	9.2		43.4	-85	0
LVC104	1	C	2021-06-07	22.9		12.9		11.4	9.3	9		30.1	-87	0
LVC104	1	A	2021-07-08	24.9		19.3		17.5	15.4	14.2		12.5	-88	0
LVC104	1	B	2021-07-08	24.9		18		16.2	14	13.1		13.5	-109	0
LVC104	1	C	2021-07-08	24.9		18.8		15.5	13	12.2		24.1	-127	0
LVC104	1	A	2021-08-09	17.4		16.4		15.7	14.9	14.5		22.1	-88	0
LVC104	1	B	2021-08-09	17.4		15.9		15.2	13.8	13.1		18.1	-102	0
LVC104	1	C	2021-08-09	17.4		15.6		14.5	13.6	12.4		31.4	-116	0
LVC104	1	A	2021-09-08	14.6		12.3		12.3	12.1	12.3		31.3	-89	0
LVC104	1	B	2021-09-08	14.6		11.9		11.6	11.2	11.2		31	-95	0
LVC104	1	C	2021-09-08	14.6		11.9		11.5	10.9	10.9		34.4	-107	0
LVC104	1	A	2021-10-11	2.4		7.1		8.9	9.2	9.9		12.7	-88	0
LVC104	1	B	2021-10-11	2.4		6.7		8.4	8.6	9.2		28.7	-94	0
LVC104	1	C	2021-10-11	2.4		7.1		8.4	8.6	9.3		28.6	-107	0
LVC104	1	A	2021-11-08	4.1		6.2		7.6	7.8	8.4		41.4	-59	0
LVC104	1	B	2021-11-08	4.1		6.3		7.6	7.6	8.1		55.8	-62	0
LVC104	1	C	2021-11-08	4.1		6.5		7.5	7.6	8.2		47.5	-59	0
LVC104	1	A	2021-12-06	-16.4		0.6		2.6	3.7	4.6		12.2	-75	18
LVC104	1	B	2021-12-06	-16.4		1.3		2.6	3.1	4		39.1	-75	18
LVC104	1	C	2021-12-06	-16.4		1.8		3	4	5.3		35.9	-81	21
LVC104	1	A	2022-01-10	-1.8		-1		0.8	1.5	2.5			-56	2
LVC104	1	B	2022-01-10	-1.8		-1.4		1.3	1.9	3.2			-60	3
LVC104	1	C	2022-01-10	-1.8		-0.6		1.4	2.3	3.6			-66	7
LVC104	1	A	2022-02-10	3.1		-0.1		0.2	1	2.1			-37	6
LVC104	1	B	2022-02-10	3.1		0.1		0.1	1.4	2.4			-45	7
LVC104	1	C	2022-02-10	3.1		0.7		0.6	1.6	2.9			-55	10
LVC104	1	A	2022-03-09	-2.1		0.2		-0.1	1.1	1.8			-55	3
LVC104	1	B	2022-03-09	-2.1		0.2		-0.2	1.6	2.6			-60	3
LVC104	1	C	2022-03-09	-2.1		0.8		0	2.1	3			-67	4
LVC104	1	A	2022-04-11	4.5	-0.7	1		1.3	1.8	2.1		32.5	-53	0
LVC104	1	B	2022-04-11	4.5	1.2	2.1		1.9	2.3	2.9		85.3	-59	0
LVC104	1	C	2022-04-11	4.5	2	2.2		2.5	2.9	3.3		35.1	-62	0
LVC104	1	A	2022-05-10	11.8	5.4	5.9		6.2	6.1	5.9		26.8	-77	0
LVC104	1	B	2022-05-10	11.8	4.5	5.2		5.4	5.7	5.8		29.7	-85	0
LVC104	1	C	2022-05-10	11.8	5.4	6		6.2	6	5.8		32.9	-90	0
LVC104	1	A	2022-06-06	17.3	12.2	12.2		12.8	10	9.4		44.6	-65	0
LVC104	1	B	2022-06-06	17.3	11	11.1		11.6	9.5	8.6		67.4	-72	0
LVC104	1	C	2022-06-06	17.3	10.8	11.1		11.6	9.1	8.1		37.2	-73	0
LVC104	1	A	2022-07-07	16.5	15	15.7		15.6	14.8	13.7		23.6	-82	0
LVC104	1	B	2022-07-07	16.5	14.2	14.7		14.5	13.3	12.3		27.5	-95	0
LVC104	1	C	2022-07-07	16.5	14	14.3		13.6	12.4	11.3		30.4	-104	0
LVC104	1	A	2022-08-08	18.2	16.2	15.9		15.5	14.8	14.2		26.9	-93	0
LVC104	1	B	2022-08-08	18.2	15.4	15.1		14.2	13.3	12.7		35.9	-100	0
LVC104	1	C	2022-08-08	18.2	15	14.7		13.8	12.6	11.8		36	-110	0
LVC104	1	A	2022-09-09	12.5	8.8	10.4		11.8	12.4	12.7		21.4	-97	0
LVC104	1	B	2022-09-09	12.5	8.2	9.4		10.5	10.9	11		22.7	-106	0
LVC104	1	C	2022-09-09	12.5	8.6	9.3		10.2	10.6	10.7		30.5	-128	0
LVC104	1	A	2022-10-10	5.5	7.3	8.9		10	9.4	10.6		23.4	-96	0
LVC104	1	B	2022-10-10	5.5	7.2	8.5		9.4	9	9.5		39	-95	0
LVC104	1	C	2022-10-10	5.5	7.9	9		9.6	9.2	9.6		35.4	-103	0
LVC104	1	A	2022-11-09	9.1	8.6	8.9		8.8	8.9	9.2		33	-73	0
LVC104	1	B	2022-11-09	9.1	8.2	8.6		8.4	8.4	8.5		56.3	-77	0
LVC104	1	C	2022-11-09	9.1	8.1	8.5		8.3	8.4	8.5		57.9	-82	0
LVC104	1	A	2022-12-06	-4.3	0.6	2.1		3	4.3	5.3		35.6	-72	12
LVC104	1	B	2022-12-06	-4.3	0.8	1.8		2.7	4.5	5.1		48.7	-87	14
LVC104	1	C	2022-12-06	-4.3	1.1	2.8		3.6	5	5.7		35.6	-89	11
LVC105	1	A	2021-01-12	-2.3	1.2	2.4		3.3	4.2	4.8		30.6	-36	6
LVC105	1	B	2021-01-12	-2.3	1.5	2.6		3.6	4.7	5.3		38.9	-37	5
LVC105	1	C	2021-01-12	-2.3	1.3	2.4		3.2	3.8	4.3		45.3	-27	6
LVC105	1	A	2021-02-09	-10.3	-3.1	0.2		1	2.5	3		12.6	-32	11
LVC105	1	B	2021-02-09	-10.3	-6	-0.2		0.8	3.2	3.8		10.7	-41	16
LVC105	1	C	2021-02-09	-10.3	-3.3	0.9		1	2.5	3.1		17.2	-27	23
LVC105	1	A	2021-03-10	-3.3	-0.1	0		0.9	1.6	2.3		6.3	-23	6
LVC105	1	B	2021-03-10	-3.3	0	-0.1		0.5	1.8	2.4		11	-31	6
LVC105	1	C	2021-03-10	-3.3	-0.2	0.3		0.8	1.6	2.1		5.5	-14	9
LVC105	1	A	2021-04-09	5.2		1.7		1.9	2.2	2.4		40.4	-16	0
LVC105	1	B	2021-04-09	5.2		2.1		2.1	2.7	2.9		34.3	-25	0
LVC105	1	C	2021-04-09	5.2		1.8		2	2.4	2.7		59.2	-9	0
LVC105	1	A	2021-05-13	17		9.1		7.4	6.2	5.9		26.7	-26	0
LVC105	1	B	2021-05-13	17		9.2		7.4	6.3	6.2		32	-33	0
LVC105	1	C	2021-05-13	17		9.1		7.7	6.6	6.5		46.4	-12	0
LVC105	1	A	2021-06-09	20.9		13.2		11.7	10	9.6		22.4	-27	0
LVC105	1	B	2021-06-09	20.9		13.6		11.7	10.1	9.7		32.4	-36	0
LVC105	1	C	2021-06-09	20.9		13.4		12.1	10.6	10.1		60.7	-13	0
LVC105	1	A	2021-07-13	27.5		19.5		18	16.4	15.3		30.6	-58	0
LVC105	1	B	2021-07-13	27.5		18.7		16.9	15.1	14.4		22.7	-65	0
LVC105	1	C	2021-07-13	27.5		19.2		17.8	16	15.3		34.3	-47	0
LVC105	1	A	2021-08-11	17.8		15.5		15.9	15.2	15.1		24.8	-55	0
LVC105	1	B	2021-08-11	17.8		15.8		15.8	15.2	14.8		22.7	-59	0
LVC105	1	C	2021-08-11	17.8		16.5		16.6	16.1	15.9		42	-25	0
LVC105	1	A	2021-09-13	16.3		15.4		14.9	14.2	13.8		38	-50	0
LVC105	1	B	2021-09-13	16.3		15.5		14.9	14.2	13.8		27.8	-54	0
LVC105	1	C	2021-09-13	16.3		15.3		15	14.3	14.2		59	-29	0
LVC105	1	A	2021-10-12	6.4		6.6		8.4	8.9	9.6		13.9	-61	0
LVC105	1	B	2021-10-12	6.4		6.4		8.9	9.1	10		22.4	-60	0
LVC105	1	C	2021-10-12	6.4		6.7		8.6	9.2	10.1		46.3	-45	0
LVC105	1	A	2021-11-10	2.5		4.9		6.6	7.4	8.3		39.7	-25	0
LVC105	1	B	2021-11-10	2.5		5		7.3	7.7	8.7		36	-32	0
LVC105	1	C	2021-11-10	2.5		4.8		6.9	7.2	8.2		65.2	-26	0
LVC105	1	A	2021-12-08	-18		1.8		3.7	4.1	5.1		38.1	-21	21
LVC105	1	B	2021-12-08	-18		2.3		3.7	4.4	5.4		30.5	-32	18
LVC105	1	C	2021-12-08	-18		3.1		3.9	4.1	5.1		51.9	-10	22
LVC105	1	A	2022-01-12	-9.8		-0.5		1.5	1.6	2.5			-19	2
LVC105	1	B	2022-01-12	-9.8		-0.3		1.2	1.8	2.9			-26	4
LVC105	1	C	2022-01-12	-9.8		1.3		1.9	2.1	3			3	11
LVC105	1	A	2022-02-15	4.1		0.4		0.2	1.2	1.9			-9	2
LVC105	1	B	2022-02-15	4.1		0.9		0.5	1.9	2.6			-16	7
LVC105	1	C	2022-02-15	4.1		1		0.9	1.9	2.4			-1	22
LVC105	1	A	2022-03-14	5.3		0.3		0.3	0.9	1.5			-14	0
LVC105	1	B	2022-03-14	5.3		0.6		0.2	1.4	1.9			-25	0
LVC105	1	C	2022-03-14	5.3		0.2		0.1	0.9	1.5			-5	11
LVC105	1	A	2022-04-13	9.1	1	1.2		1.2	1.3	1.6		86.8	-13	0
LVC105	1	B	2022-04-13	9.1	-0.6	0.7		1.1	1	1.5		58.7	-20	0
LVC105	1	C	2022-04-13	9.1	0	0.8		1.1	1	1.4		99.9	-3	0
LVC105	1	A	2022-05-13	12.7	7.6	7.2		7.9	6	5.5		27.5	-29	0
LVC105	1	B	2022-05-13	12.7	7.6	7.6		8.1	6	5.4		31.5	-37	0
LVC105	1	C	2022-05-13	12.7	7.3	7.4		7.8	5.9	5.3		94.8	-18	0
LVC105	1	A	2022-06-08	22.5	13.7	11.8		13.6	9.6	8.5		33.1	-25	0
LVC105	1	B	2022-06-08	22.5	13.4	11.7		12.7	9.3	8.3		33.5	-32	0
LVC105	1	C	2022-06-08	22.5	12.6	12.4		13.4	9.9	8.9		95.7	-17	0
LVC105	1	A	2022-07-08	18.4	14.1	14.5		14.4	13.7	12.8		35.5	-33	0
LVC105	1	B	2022-07-08	18.4	14	14.4		14.3	13.4	12.7		34.2	-42	0
LVC105	1	C	2022-07-08	18.4	14.5	15.1		14.9	14.1	13.4		94.1	-18	0
LVC105	1	A	2022-08-11	22.4	14.8	14.8		14.6	14	13.4		28.9	-43	0
LVC105	1	B	2022-08-11	22.4	14.4	14.8		14.6	14	13.6		8.9	-49	0
LVC105	1	C	2022-08-11	22.4	15.1	15.3		15.2	14.7	14.3		92.1	-27	0
LVC105	1	A	2022-09-13	10	10.6	11.6		12	12.1	12.2		20.8	-67	0
LVC105	1	B	2022-09-13	10	10.3	11.5		12	12.2	12.3		19.9	-80	0
LVC105	1	C	2022-09-13	10	10.6	11.8		12.2	12.5	12.7		74.1	-61	0
LVC105	1	A	2022-10-13	8.2	6.5	8.1		9.5	10.1	10.4		34.1	-58	0
LVC105	1	B	2022-10-13	8.2	6.1	8.1		9.7	10.3	10.5		26.3	-66	0
LVC105	1	C	2022-10-13	8.2	6.8	7.8		9.2	10.1	10.5		14.7	-42	0
LVC105	1	A	2022-11-10	9	8.4	9.1		9.1	9.2	9.4		36.6	-49	0
LVC105	1	B	2022-11-10	9	8.3	9.1		9.2	9.3	9.5		78.2	-50	0
LVC105	1	C	2022-11-10	9	8.3	8.8		9	9.1	9.3		94.6	-29	0
LVC105	1	A	2022-12-08	-0.5	1.6	2.1		3.1	4.3	5.1		31.1	-56	17
LVC105	1	B	2022-12-08	-0.5	1.5	2.7		4.1	4.9	5.4		45.1	-66	19
LVC105	1	C	2022-12-08	-0.5	1.6	2.8		3.5	4.8	5.5		86.1	-33	26
LVC106	1	A	2021-01-12	-2.6	0.7	2.4		3.3	4.3	5		40	-31	5
LVC106	1	B	2021-01-12	-2.6	0.7	1.3		2.4	3.7	4.2		31.7	-38	6
LVC106	1	C	2021-01-12	-2.6	1	0.7		1.5	2.6	3.3		37.4	-35	6
LVC106	1	A	2021-02-09	-9.8	-4.1	0.5		1.3	2.9	3.5		33.4	-35	22
LVC106	1	B	2021-02-09	-9.8	-4.2	-0.4		0.4	2.6	3.3		10.3	-38	15
LVC106	1	C	2021-02-09	-9.8	-3.4	0.1		0.7	2.6	3.2		8.5	-41	16
LVC106	1	A	2021-03-10	-2.4	-0.1	-0.1		0.3	1.5	2.4		1.6	-27	10
LVC106	1	B	2021-03-10	-2.4	-0.2	-0.1		0.2	1.3	2		9.8	-26	7
LVC106	1	C	2021-03-10	-2.4	-0.1	0.2		0.7	1.7	2.4		18	-32	7
LVC106	1	0	2021-04-09	6.5									-36
LVC106	1	A	2021-04-09	6.5		2.6		2.8	2.9	3.1		60.5	-23	0
LVC106	1	B	2021-04-09	6.5		2.2		2.3	2.5	2.7		39	-21	0
LVC106	1	C	2021-04-09	6.5		2.4		2.4	2.7	2.9		34.3	-24	0
LVC106	1	0	2021-05-13	16.8									-43
LVC106	1	A	2021-05-13	16.8		10.9		8.7	7.4	6.9		26.3	-28	0
LVC106	1	B	2021-05-13	16.8		10.3		8.4	7.3	6.9		41	-32	0
LVC106	1	C	2021-05-13	16.8		10		7.6	6.7	6.4		28	-36	0
LVC106	1	0	2021-06-09	20.3									-52
LVC106	1	A	2021-06-09	20.3		14.1		12.7	11	10.2		42.4	-32	0
LVC106	1	B	2021-06-09	20.3		14.4		12.4	10.7	10.1		31	-37	0
LVC106	1	C	2021-06-09	20.3		15.4		12.1	10.5	9.9		31.4	-36	0
LVC106	1	0	2021-07-13	31.2									-72
LVC106	1	A	2021-07-13	31.2		20.4		18	16	15.1		35.1	-69	0
LVC106	1	B	2021-07-13	31.2		19.8		17.7	15.7	15.1		10.8	-73	0
LVC106	1	C	2021-07-13	31.2		20		16.8	15.1	14.4		17.6	-75	0
LVC106	1	0	2021-08-11	21									-61
LVC106	1	A	2021-08-11	21		16.8		16.3	15.6	15.2		34.5	-54	0
LVC106	1	B	2021-08-11	21		17.4		16.9	16.1	16		15.4	-62	0
LVC106	1	C	2021-08-11	21		17		16.2	15.7	15.3		22.9	-60	0
LVC106	1	0	2021-09-13	16.6									-60
LVC106	1	A	2021-09-13	16.6		15.6		14.8	14.2	14.1		40.7	-49	0
LVC106	1	B	2021-09-13	16.6		15.7		15	14.4	14.2		25.2	-55	0
LVC106	1	C	2021-09-13	16.6		15.6		14.8	14.1	13.9		17	-59	0
LVC106	1	0	2021-10-12	9.7									-67
LVC106	1	A	2021-10-12	9.7		7.1		9	9.3	10		30.2	-56	0
LVC106	1	B	2021-10-12	9.7		7.7		8.9	9.7	10.5		11.4	-62	0
LVC106	1	C	2021-10-12	9.7		6.9		9.2	9.6	10.3		12.8	-65	0
LVC106	1	0	2021-11-10	3.3									-35
LVC106	1	A	2021-11-10	3.3		4.7		6.9	7.7	8.3		59.9	-28	0
LVC106	1	B	2021-11-10	3.3		4.8		7.2	7.7	8.7		38.7	-24	0
LVC106	1	C	2021-11-10	3.3		4.4		6.7	7.6	8.7		19.7	-25	0
LVC106	1	0	2021-12-08	-16.5									-36
LVC106	1	A	2021-12-08	-16.5		1.8		3.4	4	4.9		24.1	-24	22
LVC106	1	B	2021-12-08	-16.5		3.4		4.1	4.8	5.9		21.9	-28	14
LVC106	1	C	2021-12-08	-16.5		3		4.1	4.8	5.6		29.4	-31	23
LVC106	1	0	2022-01-12	-9.3									-39
LVC106	1	A	2022-01-12	-9.3		0		1.1	1.6	2.5			-23	8
LVC106	1	B	2022-01-12	-9.3		-0.3		0.9	1.9	2.8			-27	5
LVC106	1	C	2022-01-12	-9.3		0.3		1.7	2.3	3.1			-30	4
LVC106	1	0	2022-02-15	4.1									-29
LVC106	1	A	2022-02-15	4.1		1.5		1.1	1.9	2.6			-22	19
LVC106	1	B	2022-02-15	4.1		0		0	1.3	1.9			-19	8
LVC106	1	C	2022-02-15	4.1		0.5		0.1	1.7	2.4			-30	21
LVC106	1	0	2022-03-14	6.7									-40
LVC106	1	A	2022-03-14	6.7		0.4		0.1	1	1.6			-21	8
LVC106	1	B	2022-03-14	6.7		-0.1		0.2	0.9	1.5			-26	0
LVC106	1	C	2022-03-14	6.7		-0.1		0	1	1.6			-27	0
LVC106	1	0	2022-04-13	8									-14
LVC106	1	A	2022-04-13	8	1.6	2.4		2.8	2.4	2.6		95.2	-18	0
LVC106	1	B	2022-04-13	8	0	0.4		1.1	1.1	1.5		88.5	-21	0
LVC106	1	C	2022-04-13	8	0.1	1		1.1	1.2	1.6		78.2	-22	0
LVC106	1	0	2022-05-13	13.7									-42
LVC106	1	A	2022-05-13	13.7	8.1	7.8		8.7	6.5	6		86.1	-34	0
LVC106	1	B	2022-05-13	13.7	8.1	7.5		8.5	6.1	5.5		29.1	-40	0
LVC106	1	C	2022-05-13	13.7	8.1	7.5		8.7	5.9	5.3		37.2	-42	0
LVC106	1	0	2022-06-08	25.2									-39
LVC106	1	A	2022-06-08	25.2	14.3	12.5		13.7	10.1	9.1		72.1	-29	0
LVC106	1	B	2022-06-08	25.2	12.6	11.6		12.9	9.3	8.6		64.6	-33	0
LVC106	1	C	2022-06-08	25.2	14.7	12.8		14.3	9.9	8.8		34.7	-33	0
LVC106	1	0	2022-07-08	20.4									-46
LVC106	1	A	2022-07-08	20.4	15.3	15		14.8	13.9	13.2		79.4	-34	0
LVC106	1	B	2022-07-08	20.4	15.9	15.4		14.8	14.7	13.5		23.7	-48	0
LVC106	1	C	2022-07-08	20.4	15.2	14.9		14.4	13.8	12.8		33.8	-48	0
LVC106	1	A	2022-08-11	23.7	15.7	15.5		14.8	14.3	13.7		9.3	-45	0
LVC106	1	B	2022-08-11	23.7	16.6	15.6		14.8	14.5	14.1		5.4	-53	0
LVC106	1	C	2022-08-11	23.7	16.8	15.9		14.8	14.5	13.7		10.5	-53	0
LVC106	1	0	2022-09-13	10.8									-81
LVC106	1	A	2022-09-13	10.8	10.6	11.7		12	12.3	12.5		65.5	-79	0
LVC106	1	B	2022-09-13	10.8	11.6	12.1		12.6	12.9	13		13.6	-87	0
LVC106	1	C	2022-09-13	10.8	10.7	11.8		12.2	12.4	12.6		17.1	-88	0
LVC106	1	0	2022-10-13	-0.1									-63
LVC106	1	A	2022-10-13	-0.1	6.2	8.1		9.4	10.1	10.4		37.6	-64	0
LVC106	1	B	2022-10-13	-0.1	5.8	8		9.7	10.5	11		32.8	-73	0
LVC106	1	C	2022-10-13	-0.1	5.4	8.1		9.4	10.3	10.6		29.3	-64	0
LVC106	1	0	2022-11-10	9.1									-84
LVC106	1	A	2022-11-10	9.1	8.2	8.9		9	9.2	9.3		86.6	-50	0
LVC106	1	B	2022-11-10	9.1	8.5	9.2		9.4	9.6	9.7		46.9	-54	0
LVC106	1	C	2022-11-10	9.1	8.5	9.2		9.2	9.3	9.5		42.1	-50	0
LVC106	1	0	2022-12-08	-0.5									-98
LVC106	1	A	2022-12-08	-0.5	1.4	3.1		3.9	4.9	5.7		34.7	-61	22
LVC106	1	B	2022-12-08	-0.5	1	2.5		3.6	4.9	5.6		35.4	-63	20
LVC106	1	C	2022-12-08	-0.5	0.9	3		4.2	5	5.9		33.7	-63	21
LVC107	1	A	2021-01-13	-0.7	2.9	2.8		4.2	5.1	5.5		29.2	-136	12
LVC107	1	B	2021-01-13	-0.7	1.8	3.1		3.6	4.6	4.8		31.2	-136	12
LVC107	1	C	2021-01-13	-0.7	1.7	2.6		3.9	4.9	4.8		20.8	-132	12
LVC107	1	A	2021-02-08	-14.5	-5.6	0.3		1	3.7	4.3		20.2	-136	13
LVC107	1	B	2021-02-08	-14.5	-7.3	0.3		1.3	3	3.5		5.9	-109	14
LVC107	1	C	2021-02-08	-14.5	-8.9	-0.3		0.9	3.6	3.9		6.4	-136	12
LVC107	1	A	2021-03-09	-1.3	0.6	0.5		1.6	3	3.5		18.8	-110	3
LVC107	1	B	2021-03-09	-1.3	0.2	1		1.8	2.5	2.9		31.3	-81	3
LVC107	1	C	2021-03-09	-1.3	0.2	0.6		1.4	3	3.3		34.5	-85	3
LVC107	1	0	2021-04-08	3									-73
LVC107	1	A	2021-04-08	3		3.6		3.3	4.5	4.6		46.9	-111	0
LVC107	1	B	2021-04-08	3		3.1		3.1	3.9	4.1		43	-78	0
LVC107	1	C	2021-04-08	3		3.3		3.3	4.2	4.4		20.9	-83	0
LVC107	1	0	2021-05-11	19.5									-70
LVC107	1	A	2021-05-11	19.5		9.6		9.6	6.3	6.3		30.4	-114	0
LVC107	1	B	2021-05-11	19.5		8.9		9	5.9	5.9		41.1	-85	0
LVC107	1	C	2021-05-11	19.5		10.5		11.3	6.4	6.3		17.7	-90	0
LVC107	1	0	2021-06-08	19.9									-86
LVC107	1	A	2021-06-08	19.9		12.5		10.6	9.1	9		20.5	-129	0
LVC107	1	B	2021-06-08	19.9		11.7		9.9	8.9	8.8		23.3	-101	0
LVC107	1	C	2021-06-08	19.9		12.8		10.1	9.3	9.2		12.2	-105	0
LVC107	1	0	2021-07-09	27.6									-128
LVC107	1	A	2021-07-09	27.6		17.8		14.7	12.7	12.1		19.6	-132	0
LVC107	1	B	2021-07-09	27.6		16.6		13.3	12.2	12.1		12.3	-135	0
LVC107	1	C	2021-07-09	27.6		18.3		14.3	12.9	12.5		10.9	-133	0
LVC107	1	0	2021-08-10	13.8									-128
LVC107	1	A	2021-08-10	13.8		13.5		13.3	12.7	12.3		29.8	-132	0
LVC107	1	B	2021-08-10	13.8		13.3		12.9	12.3	12.3		27	-135	0
LVC107	1	C	2021-08-10	13.8		13.6		13.2	12.6	12.4		34.1	-135	0
LVC107	1	0	2021-09-09	15.3									-110
LVC107	1	A	2021-09-09	15.3		13.6		12.4	11.5	11.3		30.5	-138	0
LVC107	1	B	2021-09-09	15.3		13.1		11.9	11.3	11.3		22.2	-127	0
LVC107	1	C	2021-09-09	15.3		13.4		12.5	11.6	11.6		25	-133	0
LVC107	1	0	2021-10-08	0.9									-121
LVC107	1	A	2021-10-08	0.9		8.6		10	10	10.3		34.4	-137	0
LVC107	1	B	2021-10-08	0.9		8.7		9.2	9.8	10.1		22.4	-137	0
LVC107	1	C	2021-10-08	0.9		8.4		9.9	10	10.3		21.9	-137	0
LVC107	1	0	2021-11-09	-1.5									-95
LVC107	1	A	2021-11-09	-1.5		5.6		7.9	8	8.6		46.8	-138	0
LVC107	1	B	2021-11-09	-1.5		6.3		7.8	8	8.4		46	-105	0
LVC107	1	C	2021-11-09	-1.5		4.5		7.3	7.8	8.4		44.7	-117	0
LVC107	1	0	2021-12-07	-14.4									-83
LVC107	1	A	2021-12-07	-14.4		1.7		4.2	5.1	6.1		21.9	-118	8
LVC107	1	B	2021-12-07	-14.4		1.8		4.2	4.9	5.7		13.5	-93	8
LVC107	1	C	2021-12-07	-14.4		1.5		4.4	5.1	5.8		13.5	-103	9
LVC107	1	0	2022-01-11	-13.1									-66
LVC107	1	A	2022-01-11	-13.1		2.7		3.2	3.8	4.5			-96	8
LVC107	1	B	2022-01-11	-13.1		2.6		3.3	3.4	4			-66	5
LVC107	1	C	2022-01-11	-13.1		2.8		3.4	3.6	4.1			-68	6
LVC107	1	0	2022-02-10	1.6									-48
LVC107	1	A	2022-02-10	1.6		2.2		1.7	3.5	4.1			-98	7
LVC107	1	B	2022-02-10	1.6		2		1.4	2.9	3.5			-39	5
LVC107	1	C	2022-02-10	1.6		2.2		2.9	3.2	3.7			-32	7
LVC107	1	0	2022-03-10	-5.7									-66
LVC107	1	A	2022-03-10	-5.7		1.8		1	3	3.8			-95	2
LVC107	1	B	2022-03-10	-5.7		1.4		0.3	2.7	3.1			-56	1
LVC107	1	C	2022-03-10	-5.7		1.7		0.6	2.8	3.3			-53	1
LVC107	1	0	2022-04-12	2.3									-59
LVC107	1	A	2022-04-12	2.3	3.1	4		3.5	4.3	4.6		45.1	-98	0
LVC107	1	B	2022-04-12	2.3	2.7	3.6		3	3.7	3.9		36.6	-60	0
LVC107	1	C	2022-04-12	2.3	2.9	3.8		3.4	3.9	4.1		36.5	-59	0
LVC107	1	0	2022-05-11	11.4									-75
LVC107	1	A	2022-05-11	11.4	7.4	7		7.6	6	6		26.4	-115	0
LVC107	1	B	2022-05-11	11.4	6.5	6.4		7.1	5.5	5.6		30.7	-88	0
LVC107	1	C	2022-05-11	11.4	7.1	7		7.4	5.8	5.9		28.5	-92	0
LVC107	1	0	2022-06-07	16.7									-69
LVC107	1	A	2022-06-07	16.7	11.4	11.4		13.6	8.6	8.4		36.1	-108	0
LVC107	1	B	2022-06-07	16.7	10.2	10.2		10.8	8.4	8.1		26.5	-74	0
LVC107	1	C	2022-06-07	16.7	10.9	10.6		11.2	8.6	8.4		34.4	-77	0
LVC107	1	0	2022-07-13	19.7									-74
LVC107	1	A	2022-07-13	19.7	15.5	14.9		12.8	11.5	11.2		34.3	-111	0
LVC107	1	B	2022-07-13	19.7	14.7	14.1		12.8	11.9	11.6		34.3	-75	0
LVC107	1	C	2022-07-13	19.7	15.6	14.5		12.7	12.1	11.8		35.3	-82	0
LVC107	1	0	2022-08-09	17.4									-111
LVC107	1	A	2022-08-09	17.4	13.3	13.7		12.6	12	11.7		25.5	-136	0
LVC107	1	B	2022-08-09	17.4	13.2	13.3		12.4	12.1	11.8		18.1	-131	0
LVC107	1	C	2022-08-09	17.4	13.6	13.3		12.6	12.3	12.2		20.4	-135	0
LVC107	1	0	2022-09-08	5.4									-118
LVC107	1	A	2022-09-08	5.4	8.7	10.3		11	11.1	11.1		30.3	-136	0
LVC107	1	B	2022-09-08	5.4	8.9	10.3		11	11.2	11.2		23.7	-135	0
LVC107	1	C	2022-09-08	5.4	8.6	10.3		12.2	11.3	11.4		19	-137	0
LVC107	1	0	2022-10-11	7.4									-129
LVC107	1	A	2022-10-11	7.4	7.9	9.3		9.8	10	10		18.7	-138	0
LVC107	1	B	2022-10-11	7.4	7.9	9.1		9.6	9.8	9.9		17.1	-137	0
LVC107	1	C	2022-10-11	7.4	7.8	9.1		9.7	10	10		13.2	-146	0
LVC107	1	0	2022-11-11	10.2									-122
LVC107	1	A	2022-11-11	10.2	8.5	9.3		9.4	9.4	9.3		11.6	-137	0
LVC107	1	B	2022-11-11	10.2	8.5	9.2		9.3	9.3	9.2		35	-139	0
LVC107	1	C	2022-11-11	10.2	8.6	9.3		9.4	9.5	9.4		30.3	-137	0
LVC107	1	0	2022-12-07	-2.1									-116
LVC107	1	A	2022-12-07	-2.1	1.1	2.5		4.3	6.1	6.3		32.2	-139	10
LVC107	1	B	2022-12-07	-2.1	2	3.1		4.6	5.3	5.9		28.8	-144	7
LVC107	1	C	2022-12-07	-2.1	1.5	3.5		5	5.6	6.1		30.8	-135	8
LVC108	1	A	2021-01-18	-8.3	0.1	0.9		1.5	2.1	2.6		83.5	-6	13
LVC108	1	B	2021-01-18	-8.3	-1	0.9		1.3	1.9	2.7		79.9	0	14
LVC108	1	C	2021-01-18	-8.3	-1	1.3		2.2	3	3.4		77.6	0	16
LVC108	1	A	2021-02-17	-12.2	-2.3	0.5		0.5	1.5	2.1		80.1	-11	33
LVC108	1	B	2021-02-17	-12.2	-1.9	0.5		1	2.1	2.5		79.6	-7	27
LVC108	1	C	2021-02-17	-12.2	-1.6	1		1.2	2.4	2.7		57.9	-32	33
LVC108	1	A	2021-03-18	0.5	1.6	1		1.2	1.7	1.9		73	-2	0
LVC108	1	B	2021-03-18	0.5	1.2	0.2		0.3	0.9	1.4		12.9	4	0
LVC108	1	C	2021-03-18	0.5	1.1	0.4		0.6	0.9	1.1		66.4	-12	0
LVC108	1	0	2021-04-20	14.5									-46	0
LVC108	1	A	2021-04-20	14.5		6.6		7.6	5.1	5.2		74.2	-2	0
LVC108	1	B	2021-04-20	14.5		6.7		7.1	5.4	5.4		74.5	-1	0
LVC108	1	C	2021-04-20	14.5		6.7		7.3	4.3	4.4		69.9	-21	0
LVC108	1	0	2021-05-20	11.3									-39
LVC108	1	A	2021-05-20	11.3		10.5		10.6	9.8	9.5		73.8	-1	0
LVC108	1	B	2021-05-20	11.3		10.4		10.6	10.1	9.6		74.3	0	0
LVC108	1	C	2021-05-20	11.3		9.2		8.7	8.3	8.4		70.9	-17	0
LVC108	1	0	2021-06-17	24.9									-59
LVC108	1	A	2021-06-17	24.9		16.7		13.6	12.4	12		70.2	-16	0
LVC108	1	B	2021-06-17	24.9		15.9		13.2	12	11.6		72.7	-18	0
LVC108	1	C	2021-06-17	24.9		14.7		12.6	11	10.6		51.7	-45	0
LVC108	1	0	2021-07-20	19.8									-84
LVC108	1	A	2021-07-20	19.8		17.6		17.9	17.4	17		60.8	-61	0
LVC108	1	B	2021-07-20	19.8		17.4		17.9	17.5	17		69.9	-59	0
LVC108	1	C	2021-07-20	19.8		17.1		17.2	16	17.2		35.9	-101	0
LVC108	1	0	2021-08-23	15.6									-67
LVC108	1	A	2021-08-23	15.6		14.1		14.2	14.1	14.1		65.2	-50	0
LVC108	1	B	2021-08-23	15.6		13.5		13.9	13.7	13.7		70.3	-56	0
LVC108	1	C	2021-08-23	15.6		14.3		14	13.5	13.3		35	-92	0
LVC108	1	0	2021-09-17	7.4									-73
LVC108	1	A	2021-09-17	7.4		9		11.1	12.2	11.8		35.7	-54	0
LVC108	1	B	2021-09-17	7.4		10.1		10.9	11.1	11.5		69	-57	0
LVC108	1	C	2021-09-17	7.4		10		11.3	11.3	11.7		34.9	-90	0
LVC108	1	0	2021-10-21	14.2									-49
LVC108	1	A	2021-10-21	14.2		8.4		7.2	6.9	7.2		69.3	-5	0
LVC108	1	B	2021-10-21	14.2		8		7.2	7	7.4		73.5	-30	0
LVC108	1	C	2021-10-21	14.2		5.8		7.7	7.5	7.9		59	-55	0
LVC108	1	0	2021-11-25	5									-43
LVC108	1	A	2021-11-25	5		1.1		2.8	3.1	4.3		76.1	-2	0
LVC108	1	B	2021-11-25	5		2.5		3.1	3.4	4		75.4	0	0
LVC108	1	C	2021-11-25	5		4.2		5.2	5.3	5.9		62.8	-17	0
LVC108	1	0	2021-12-16	2.5									-23
LVC108	1	A	2021-12-16	2.5		1.4		1.8	2.4	3.1		77.2	-3	12
LVC108	1	B	2021-12-16	2.5		1.6		2.4	2.7	3.5		77.2	1	12
LVC108	1	C	2021-12-16	2.5		3		3.8	4	4.5		65.6	-15	10
LVC108	1	0	2022-01-26	-3.7									-47
LVC108	1	A	2022-01-26	-3.7		0.8		1.3	1.4	2			-6	26
LVC108	1	B	2022-01-26	-3.7		0.4		0.9	0.9	1.5			0	23
LVC108	1	C	2022-01-26	-3.7		1.7		1.9	2.4	2.7			-15	26
LVC108	1	0	2022-02-23	-0.9									-38
LVC108	1	A	2022-02-23	-0.9		0.8		-0.1	1.4	1.9			-5	42
LVC108	1	B	2022-02-23	-0.9		1.1		0.2	1.2	1.6			0	35
LVC108	1	C	2022-02-23	-0.9		0.9		-0.1	1.1	1.6			-11	40
LVC108	1	0	2022-03-23	8.2									-29
LVC108	1	A	2022-03-23	8.2		0		0.3	0.8	1.5			-3	29
LVC108	1	B	2022-03-23	8.2		0.4		0.6	0.7	1.3			-4	21
LVC108	1	C	2022-03-23	8.2		0.5		0.1	1.4	1.9			-14	29
LVC108	1	0	2022-04-27	3.2									-38
LVC108	1	A	2022-04-27	3.2	4.6	5.9		5.4	5.8	5.4		99.4	-1	0
LVC108	1	B	2022-04-27	3.2	4.6	5.4		4.6	5.8	5.9		96.1	0	0
LVC108	1	C	2022-04-27	3.2	3.7	4.4		4.1	4.7	4.6		96.6	-14	0
LVC108	1	0	2022-05-26	14.3									-34
LVC108	1	A	2022-05-26	14.3	12.3	11.1		10.1	9.5	8.2		98.1	0	0
LVC108	1	B	2022-05-26	14.3	12.4	11.4		12.3	9.6	8.4		98.6	0	0
LVC108	1	C	2022-05-26	14.3	9.3	9.1		8.6	7.8	7.5		95.9	-18	0
LVC108	1	0	2022-06-27	27.1									-59
LVC108	1	A	2022-06-27	27.1	18.3	18.5		15.6	13.7	12.1		96.1	-21	0
LVC108	1	B	2022-06-27	27.1	18.3	16.9		14.7	12.5	11.4		95.6	-20	0
LVC108	1	C	2022-06-27	27.1	18.7	16.2		13.9	11.9	11.1		87.1	-46	0
LVC108	1	0	2022-07-21	25.5									-69
LVC108	1	A	2022-07-21	25.5	17.8	16.3		14.7	13.8	13.2		91.6	-51	0
LVC108	1	B	2022-07-21	25.5	16.9	15.6		14.1	13.3	12.6		95.1	-51	0
LVC108	1	C	2022-07-21	25.5	17.3	15.6		14	13.1	12.3		54.8	-80	0
LVC108	1	0	2022-08-23	26.2									-86
LVC108	1	A	2022-08-23	26.2	18.5	17.8		16.8	15.8	14.5		10.6	-73	0
LVC108	1	B	2022-08-23	26.2	18.7	18		16.5	15.5	14.4		88.1	-71	0
LVC108	1	C	2022-08-23	26.2	18.8	17.2		15.9	14.8	13.5		22.5	-103	0
LVC108	1	0	2022-09-23	7.8									-68
LVC108	1	A	2022-09-23	7.8	8.9	9.9		10.5	10.7	9.8		90.8	-48	0
LVC108	1	B	2022-09-23	7.8	8.6	9.9		10.5	10.6	9.7		93.9	-62	0
LVC108	1	C	2022-09-23	7.8	8.7	10		10.8	10.9	9.9		44.8	-84	0
LVC108	1	0	2022-10-26	12.2									-44
LVC108	1	A	2022-10-26	12.2	7.6	7.8		7.7	7.9	8.2		96.9	-8	0
LVC108	1	B	2022-10-26	12.2	8	8		7.7	8	8.2		95.6	-20	0
LVC108	1	C	2022-10-26	12.2	8.2	8.2		8.2	8.5	8.7		84.8	-37	0
LVC108	1	0	2022-11-24	-3.4									-45
LVC108	1	A	2022-11-24	-3.4	0.3	2.2		3.2	4.5	5.5		97.1	-4	15
LVC108	1	B	2022-11-24	-3.4	0.9	2.1		2.8	4.3	5.1		97.4	-11	14
LVC108	1	C	2022-11-24	-3.4	2.7	3.5		5	6.1	6.2		89.6	-23	14
LVC108	1	0	2022-12-15	-12.3									-46
LVC108	1	A	2022-12-15	-12.3	0.7	1.5		1.9	2.9	3.3		93.6	-7	38
LVC108	1	B	2022-12-15	-12.3	1.6	2.2		2.3	3.2	3.6		90.3	-2	30
LVC108	1	C	2022-12-15	-12.3	0.9	2.7		3.1	4.8	4.8		37.5	-24	33
LVC109	1	A	2021-01-11	-0.1	0.2	1.6		2.7	3	3.6		86	-18
LVC109	1	B	2021-01-11	-0.1	0.5	0.8		1.7	2.1	3.1		86.1	-1
LVC109	1	C	2021-01-11	-0.1	1.3	0.8		1.7	2.3	3.1		83.7	-21
LVC109	1	A	2021-02-10	-10.6	-0.5	0.9		0.9	1.9	2.3		87.2	-4	23
LVC109	1	B	2021-02-10	-10.6	-2.2	0.3		0.6	1.3	1.7		79	-1	29
LVC109	1	C	2021-02-10	-10.6	-0.5	0.8		1.3	2.1	2.7		83.8	-3	30
LVC109	1	A	2021-03-08	-2.7	0.1	0.7		1	2.2	2.4		77.3	-2	2
LVC109	1	B	2021-03-08	-2.7	0.2	0.5		0.9	1.4	2		77.6	-3	3
LVC109	1	C	2021-03-08	-2.7	0.1	0.7		1.1	1.9	2.9		74.8	-1	7
LVC109	1	A	2021-04-07	2.5		3.2		3.3	3.9	4.1		78.2	2	0
LVC109	1	B	2021-04-07	2.5		3.2		3.2	3.9	4.1		76.6	2	0
LVC109	1	C	2021-04-07	2.5		2.9		3	3.5	3.7		76.5	3	0
LVC109	1	A	2021-05-10	21.6		11.3		11.6	6.9	6.9		77.7	1	0
LVC109	1	B	2021-05-10	21.6		9.5		10.9	7.3	7.2		75.6	1	0
LVC109	1	C	2021-05-10	21.6		9.6		12	6.7	6.6		75.3	1	0
LVC109	1	A	2021-06-07	25.2		13.5		11.7	10.4	10.3		74.9	-1	0
LVC109	1	B	2021-06-07	25.2		14.8		12.7	11.7	11.3		76.3	-2	0
LVC109	1	C	2021-06-07	25.2		15.1		13.2	11.8	11.2		74.2	-5	0
LVC109	1	A	2021-07-08	26.8		21.1		18.1	16.2	15.3		61.6	-50	0
LVC109	1	B	2021-07-08	26.8		20.1		17.9	15.4	14.7		64.3	-47	0
LVC109	1	C	2021-07-08	26.8		19.9		17.4	15	14.2		72.3	-51	0
LVC109	1	A	2021-08-09	18.8		16.6		16	15.3	15		67.2	-47	0
LVC109	1	B	2021-08-09	18.8		16.4		15.8	15.2	14.8		57.5	-46	0
LVC109	1	C	2021-08-09	18.8		16.5		15.9	15.2	14.7		60.6	-51	0
LVC109	1	A	2021-09-08	18.8		12.4		12.1	11.8	11.9		74.8	-8	0
LVC109	1	B	2021-09-08	18.8		12.2		11.7	11.4	11.6		74.8	-11	0
LVC109	1	C	2021-09-08	18.8		12.4		12.1	11.7	11.8		65.1	-14	0
LVC109	1	A	2021-10-11	10.5		8		9.5	9.5	9.9		77.6	-10	0
LVC109	1	B	2021-10-11	10.5		7.3		8.5	8.6	9.3		76.7	-11	0
LVC109	1	C	2021-10-11	10.5		7.7		9	9.2	9.8		74.8	-14	0
LVC109	1	A	2021-11-08	4.6		6.7		7.4	7.4	8		78.3	0	0
LVC109	1	B	2021-11-08	4.6		7.1		7.5	7.3	7.8		77.8	0	0
LVC109	1	C	2021-11-08	4.6		6.8		7.4	7.4	7.9		77.4	0	0
LVC109	1	A	2021-12-06	-13		1.1		2.2	3	4.2		68.6	-3	21
LVC109	1	B	2021-12-06	-13		0.6		1.2	1.2	2.9		69.8	2	21
LVC109	1	C	2021-12-06	-13		1.6		2.8	3.3	4.6		68.3	3	23
LVC109	1	C	2022-01-10	-0.7		0.1		1.6	2	3			-1	6
LVC109	1	A	2022-01-10	-0.7		-0.2		0.7	1	1.5			-2	8
LVC109	1	B	2022-01-10	-0.7		0		1.5	1.6	2.8			-3	7
LVC109	1	A	2022-02-11	2.4	-0.9	1.5		0.1	2.5	3.2		99.1	-1	16
LVC109	1	B	2022-02-11	2.4	-0.2	0.9		0.9	1.3	1.9		99.9	-4	20
LVC109	1	C	2022-02-11	2.4	-0.3	1.1		1	1.7	2.5		97.7	-5	25
LVC109	1	A	2022-03-09	0.5		0.7		0.5	2	2.6			-1	24
LVC109	1	B	2022-03-09	0.5		0.5		0.1	0.9	1.6			-2	25
LVC109	1	C	2022-03-09	0.5		0.9		0.4	1.6	2.1			-1	25
LVC109	1	A	2022-04-11	9	4	3.4		4.4	3.7	4.1		99.9	1	0
LVC109	1	B	2022-04-11	9	2.7	2.5		3.3	2.6	2.8		99.9	0	0
LVC109	1	C	2022-04-11	9	3.4	2.7		3.9	2.7	3		99.9	1	0
LVC109	1	A	2022-05-10	15.9	12.5	9.4		11.7	7.6	7.4		99.9	0	0
LVC109	1	B	2022-05-10	15.9	10.1	8.5		10.7	7.7	7.7		99.2	0	0
LVC109	1	C	2022-05-10	15.9	9.7	8.1		10.2	7.1	6.7		98.2	0	0
LVC109	1	A	2022-06-06	22.5	16.5	13.4		17.2	11.3	10.7		98.7	0	0
LVC109	1	B	2022-06-06	22.5	14.9	13.6		14.7	11.7	10.8		99.1	-1	0
LVC109	1	C	2022-06-06	22.5	12.3	12.9		14.1	10.8	9.9		98.6	-1	0
LVC109	1	A	2022-07-07	15.3	16.2	15.7		15.3	14.8	14.2		85.6	-17	0
LVC109	1	B	2022-07-07	15.3	15.7	15.6		15.5	14.9	14.6		97.2	-17	0
LVC109	1	C	2022-07-07	15.3	15.6	15.5		15.2	14.6	13.8		97.1	-22	0
LVC109	1	A	2022-08-08	16.8	14.1	14.5		14.6	14.1	13.9		99.9	-2	0
LVC109	1	B	2022-08-08	16.8	14.5	14.8		14.8	14.4	13.7		99.6	-1	0
LVC109	1	C	2022-08-08	16.8	14.7	14.9		14.8	14.2	13.6		94.3	-2	0
LVC109	1	A	2022-09-09	6.5	8.7	10.4		11.4	12	12.4		92.8	-41	0
LVC109	1	B	2022-09-09	6.5	8.8	10.3		11.2	11.7	12		88.5	-39	0
LVC109	1	C	2022-09-09	6.5	8.6	10.5		11.6	12.1	12.3		92.9	-43	0
LVC109	1	A	2022-10-10	11.8	8.4	9.6		10	9.7	10.3		99.1	0	0
LVC109	1	B	2022-10-10	11.8	8.2	8.8		9.4	8.9	9.9		97.7	-3	0
LVC109	1	C	2022-10-10	11.8	8.3	9.4		9.9	9.6	10.3		95.4	-8	0
LVC109	1	A	2022-11-09	10.6	7.9	8.7		8.7	8.9	8.9		99.9	2	0
LVC109	1	B	2022-11-09	10.6	7.6	8.1		8.1	8.1	8.2		98.4	-1	0
LVC109	1	C	2022-11-09	10.6	7.9	8.5		8.5	8.7	8.9		96.9	0	0
LVC109	1	A	2022-12-07	-2.9	2.3	3.6		4.3	4.7	5.1		97.8	0	15
LVC109	1	B	2022-12-07	-2.9	0.3	1.3		1.7	2.7	3.5		94.2	1	17
LVC109	1	C	2022-12-07	-2.9	0.7	2.6		3	4.1	4.8		92.6	-5	18
LVC110	1	A	2021-01-13	-0.2	2.4	4.2		5.2	5.4	5.7		29.9	-112	17
LVC110	1	B	2021-01-13	-0.2	2.1	3		4	5.4	5.7		45	-82	17
LVC110	1	C	2021-01-13	-0.2	2.3	2.9		4.5	5.5	5.7		29.6	-92	17
LVC110	1	A	2021-02-08	-11.5	-5.1	1.8		3	4	4.3		8.3	-102	11
LVC110	1	B	2021-02-08	-11.5	-3.5	1.4		2	3.3	4.2		33.8	-76	12
LVC110	1	C	2021-02-08	-11.5	-4.5	1.1		2.3	4.1	4.5		10.3	-85	16
LVC110	1	A	2021-03-09	0.1	0.3	1.2		2.4	3.3	3.6		8.8	-81	1
LVC110	1	B	2021-03-09	0.1	0.4	0.5		1	2.4	3.2		41.7	-48	3
LVC110	1	C	2021-03-09	0.1	0.6	0.6		1.5	3.2	3.5		3	-55	2
LVC110	1	A	2021-04-08	6.9		3.9		4	4.3	4.5		37.7	-70	0
LVC110	1	B	2021-04-08	6.9		3.4		3.6	3.8	4		43.9	-37	0
LVC110	1	C	2021-04-08	6.9		4.1		4	4.4	4.5		25.3	-40	0
LVC110	1	A	2021-05-11	23.4		10.3		9.2	6.3	6.2		23.6	-67	0
LVC110	1	B	2021-05-11	23.4		10.5		11	6.5	6.4		57.5	-18	0
LVC110	1	C	2021-05-11	23.4		10.5		9.9	6.3	6.4		31.4	-39	0
LVC110	1	A	2021-06-08	23.7		13.5		10.3	9.2	9.1		22.8	-61	0
LVC110	1	B	2021-06-08	23.7		14.2		12.3	10.7	10.3		60.1	-18	0
LVC110	1	C	2021-06-08	23.7		13.9		11.1	9.6	9.5		14.2	-33	0
LVC110	1	A	2021-07-09	30.2		17.8		15	12.8	12.4		18	-128	0
LVC110	1	B	2021-07-09	30.2		17.4		15.5	13.8	13.1		30.8	-106	0
LVC110	1	C	2021-07-09	30.2		17.9		14.6	12.9	12.7		13.4	-106	0
LVC110	1	A	2021-08-10	17.8		13.7		13.1	12.6	12.6		31.3	-128	0
LVC110	1	B	2021-08-10	17.8		14.7		14.4	13.6	13.3		37.3	-131	0
LVC110	1	C	2021-08-10	17.8		14.4		13.6	12.9	12.9		20.7	-132
LVC110	1	A	2021-09-09	19.9		12.7		12	11.5	11.6		25.5	-130	0
LVC110	1	B	2021-09-09	19.9		13.7		12.8	12.2	12.1		31.9	-121	0
LVC110	1	C	2021-09-09	19.9		14		12.2	11.8	11.8		21.6	-124
LVC110	1	A	2021-10-08	5.7		8.2		10	10.1	10.4		33.1	-131	0
LVC110	1	B	2021-10-08	5.7		9.1		10.3	10.2	10.6		34.2	-129	0
LVC110	1	C	2021-10-08	5.7		8		10.3	10.3	10.6		17.3	-131
LVC110	1	A	2021-11-09	-0.4		5.5		8	8.1	8.7		46.3	-131	0
LVC110	1	B	2021-11-09	-0.4		6.3		7.6	8.1	8.7		53	-96	0
LVC110	1	C	2021-11-09	-0.4		5.2		8	8.3	8.7		34.8	-115	0
LVC110	1	A	2021-12-07	-14.9		3		5	5.6	6.2		13.7	-112	11
LVC110	1	B	2021-12-07	-14.9		3		4.4	5.2	5.9		24	-94	11
LVC110	1	C	2021-12-07	-14.9		2.5		4.4	5.3	6.2		12.2	-106	9
LVC110	1	A	2022-01-11	-8.7		2.9		3.8	4	4.5			-71	3
LVC110	1	B	2022-01-11	-8.7		2.1		2.6	3.2	4.2			-28	11
LVC110	1	C	2022-01-11	-8.7		2.7		3.6	3.9	4.4			-50	6
LVC110	1	A	2022-02-11	0.9	2.2	3		2	3.5	4		92.4	-10	10
LVC110	1	B	2022-02-11	0.9	0.4	1.7		0.9	2.5	3.5		73.1	1	15
LVC110	1	C	2022-02-11	0.9	1.4	2.5		1.7	3.5	4		48.7	-23	10
LVC110	1	A	2022-03-10	-2.7		0.9		0.3	1.9	2.4			-1	2
LVC110	1	B	2022-03-10	-2.7		1.4		0.7	2.1	2.9			-4	1
LVC110	1	C	2022-03-10	-2.7		2.2		1	3.1	3.6			-11	2
LVC110	1	A	2022-04-12	6.2	3.2	3.7		3.7	3.7	3.9		98.7	-9	0
LVC110	1	B	2022-04-12	6.2	2.5	3.3		3.1	3.3	3.6		99.9	0	0
LVC110	1	C	2022-04-12	6.2	3.2	4.1		4	4.1	4.4		33.9	-20	0
LVC110	1	A	2022-05-11	14.1	6.9	6.6		7.8	5.8	5.9		31.9	-73	0
LVC110	1	B	2022-05-11	14.1	7.2	7.1		7.8	6.1	6		36.4	-35	0
LVC110	1	C	2022-05-11	14.1	7.6	7		8.1	6	6.1		19.4	-51	0
LVC110	1	A	2022-06-07	23.7	12.1	10.3		11.6	8.7	8.4		31	-50	0
LVC110	1	B	2022-06-07	23.7	12.4	11.6		12.6	9.5	8.8		90.6	-17	0
LVC110	1	C	2022-06-07	23.7	12.4	10.6		12.3	8.9	8.7		27.6	-43	0
LVC110	1	A	2022-07-13	16.7	13.6	13.5		12.5	12	11.8		71.1	-14	0
LVC110	1	B	2022-07-13	16.7	14.9	14.9		14.2	13.2	12.7		94.4	-5	0
LVC110	1	C	2022-07-13	16.7	14.5	14.2		13.3	12.1	12		33	-24	0
LVC110	1	A	2022-08-09	19.5	14.1	13.5		12.8	12.6	12.5		32.2	-80	0
LVC110	1	B	2022-08-09	19.5	15	15		14.3	13.5	13.2		85.3	-58	0
LVC110	1	C	2022-08-09	19.5	15.8	14.5		13.4	12.7	12.6		14.4	-66	0
LVC110	1	A	2022-09-08	11.1	9.5	11.1		11.6	11.7	11.7		12.8	-109	0
LVC110	1	B	2022-09-08	11.1	8.9	11		11.9	12.1	12.2		69.2	-96	0
LVC110	1	C	2022-09-08	11.1	8.5	11.1		11.9	12	12		23	-105	0
LVC110	1	A	2022-10-11	8.9	8.5	9.6		10	10.2	10.2		16.1	-107	0
LVC110	1	B	2022-10-11	8.9	8.6	9.4		9.9	10.2	10.3		53.4	-101	0
LVC110	1	C	2022-10-11	8.9	8.3	9.4		10	10.4	10.4		19.9	-100	0
LVC110	1	A	2022-11-11	10	8.7	9.3		9.4	9.5	9.4		32.9	-100	0
LVC110	1	B	2022-11-11	10	8.3	9		9.1	9.3	9.2		89.8	-79	0
LVC110	1	C	2022-11-11	10	8.6	9.5		9.5	9.6	9.5		31.4	-91	0
LVC110	1	A	2022-12-07	-2.2	3	4.1		5.4	5.9	6.2		31.2	-131	10
LVC110	1	B	2022-12-07	-2.2	0.7	2.9		3.7	4.8	5.5		35.9	-91	22
LVC110	1	C	2022-12-07	-2.2	1.9	3.3		5	6.2	6.3		33.4	-130	23
LVC111	1	A	2021-01-19	-7.7	-0.4	0.8		1.3	1.4	1.9		85.3	-10	14
LVC111	1	B	2021-01-19	-7.7	0.1	0.3		0.9	1.5	2.1		86.2	-4	18
LVC111	1	C	2021-01-19	-7.7	-1.7	0.1		0.4	0.8	1.5		19.1	-25	16
LVC111	1	A	2021-02-16	-2	0	0.4		0.6	1.1	1.6		90.2	-4	39
LVC111	1	B	2021-02-16	-2	0.1	0.5		0.5	0.9	1.2		91.1	-9	35
LVC111	1	C	2021-02-16	-2	-0.3	-0.1		0.2	0.7	1.1		11.5	-9	37
LVC111	1	A	2021-03-16	4.4	0.7	0.8		0.9	1.2	1.4		75.6	-1	20
LVC111	1	B	2021-03-16	4.4	0.8	0.5		0.5	0.8	1.1		78	-2	20
LVC111	1	C	2021-03-16	4.4	1	0		0.1	0.5	0.7		15.1	-1	17
LVC111	1	A	2021-04-20	14.3		5.6		5.7	4.7	4.8		79.1	-4	0
LVC111	1	B	2021-04-20	14.3		4.3		4.9	3.3	3.3		77.7	-3	0
LVC111	1	C	2021-04-20	14.3		6.2		6.8	4.6	4.5		78.4	-1	0
LVC111	1	A	2021-05-19	11.6		11.3		11.1	10.5	10.6		78.6	-1	0
LVC111	1	B	2021-05-19	11.6		11.3		10.5	9.5	9.1		77.2	-1	0
LVC111	1	C	2021-05-19	11.6		11.8		11.4	10.6	10.2		76.9	-1	0
LVC111	1	A	2021-06-17	17.7		13.2		13.1	12.4	12.1		75.5	-6	0
LVC111	1	B	2021-06-17	17.7		13.4		13.2	12.3	12		76.6	-4	0
LVC111	1	C	2021-06-17	17.7		13.8		13.5	13	12.6		75.8	-6	0
LVC111	1	A	2021-07-20	17		16.3		17.4	16.7	16.5		44.3	-45	0
LVC111	1	B	2021-07-20	17		17.1		17.9	17.1	16.9		56.4	-40	0
LVC111	1	C	2021-07-20	17		17.1		18.1	17.5	17.4		57.2	-40	0
LVC111	1	A	2021-08-23	12.8		13		14	13.9	14		38.5	-36	0
LVC111	1	B	2021-08-23	12.8		13		14	14	14.1		55.2	-31	0
LVC111	1	C	2021-08-23	12.8		13.4		14.3	14.2	14.4		66.4	-26	0
LVC111	1	A	2021-09-23	10.1		8.6		9.7	9.9	10.4		50.6	-33	0
LVC111	1	B	2021-09-23	10.1		8.4		9.5	9.7	10.4		57.9	-27	0
LVC111	1	C	2021-09-23	10.1		8.6		9.5	9.9	10.5		62.5	-27	0
LVC111	1	A	2021-10-22	5.6		7.6		7.9	7.6	8		76	-7	0
LVC111	1	B	2021-10-22	5.6		7.5		7.6	7.4	7.7		76	-3	0
LVC111	1	C	2021-10-22	5.6		7.6		8	7.7	7.8		78.7	-2	0
LVC111	1	A	2021-11-24	2.7		2.4		3.5	3.8	4.6		79.7	-3	1
LVC111	1	B	2021-11-24	2.7		4.2		4.9	3	3.7		79	-1	1
LVC111	1	C	2021-11-24	2.7		1		1.7	2.2	3.2		79	-102	1
LVC111	1	A	2021-12-16	2		1.3		1.6	1.6	2.1		78.9	-1	17
LVC111	1	B	2021-12-16	2		1.2		2	2.2	3.2		78	-1	18
LVC111	1	C	2021-12-16	42		0.4		0.7	0.8	1.3		72.9	0	20
LVC111	1	A	2022-01-25	-0.8		0.5		0.9	0.6	1			-6	33
LVC111	1	B	2022-01-25	-0.8		0.5		0.6	0.4	0.8			-6	30
LVC111	1	C	2022-01-25	-0.8		0		0.2	0.1	0.5			-9	37
LVC111	1	A	2022-02-21	1		0.2		-0.7	0.3	0.8			0	45
LVC111	1	B	2022-02-21	1		0		-0.9	0.1	0.6			0	48
LVC111	1	C	2022-02-21	1		0.2		-0.1	0.3	0.8			-4	50
LVC111	1	A	2022-03-23	6.5		0		0	0.1	0.4			-7	32
LVC111	1	B	2022-03-23	6.5										38
LVC111	1	C	2022-03-23	6.5		0.1		0.1	0.1	0.6			-12	45
LVC111	1	A	2022-04-26	10.1	11.5	6.9		11.4	6.1	6.4		99.9	1	0
LVC111	1	B	2022-04-26	10.1	5.9	4.9		7.5	4.4	3.8		99.9	1	0
LVC111	1	C	2022-04-26	10.1	6.9	5.4		7.4	4.3	3.6		99.9	0	0
LVC111	1	A	2022-05-24	20.4	14.4	11.1		12.4	9.8	9.6		99.9	-2	0
LVC111	1	B	2022-05-24	20.4	11.5	9.8		6	8.1	7.7		99.9	-2	0
LVC111	1	C	2022-05-24	20.4	12.4	10.3		9.7	8.3	7.7		99.9	-2	0
LVC111	1	A	2022-06-20	17.9	14.6	14		14.5	13.1	13.1		99.9	0	0
LVC111	1	B	2022-06-20	17.9	15.3	13.5		12.5	12.7	12.2		96.7	0	0
LVC111	1	C	2022-06-20	17.9	14.2	13.7		14.1	12.2	11.7		93.6	-2	0
LVC111	1	A	2022-07-20	18.5	14.4	14.5		14.2	13.8	13.4		96.4	-12	0
LVC111	1	B	2022-07-20	18.5	14.5	14.9		14.4	13.9	13.4		99.9	-10	0
LVC111	1	C	2022-07-20	18.5	14.7	14.7		14.5	13.9	13.7		97.2	-14	0
LVC111	1	A	2022-08-23	23.2	17.5	17.5		16.5	15.8	14.7		7.1	-39	0
LVC111	1	B	2022-08-23	23.2	18.4	17.6		16.8	16	14.9		26.5	-35	0
LVC111	1	C	2022-08-23	23.2	17.9	17.9		17.2	16.3	15.3		5.6	-38	0
LVC111	1	A	2022-09-20	11.9	10.1	10.8		11.2	11	11		59.5	-36	0
LVC111	1	B	2022-09-20	11.9	9.9	10.9		11.1	11.3	11		96.1	-31	0
LVC111	1	C	2022-09-20	11.9	10.2	10.9		11.2	11.4	11.1		95.7	-31	0
LVC111	1	A	2022-10-20	6.5	6.4	7.3		7.7	8.8	8.9		99.4	-4	0
LVC111	1	B	2022-10-20	6.5	6.7	6.9		7.4	8.4	8.7		99.9	-4	0
LVC111	1	C	2022-10-20	6.5	6.1	6.8		7.5	8.3	8.8		97.6	-3	0
LVC111	1	A	2022-11-22	-5.5		3.5		4.3	4.8	5.5			-3	18
LVC111	1	B	2022-11-22	-5.5		1.9		3	4.5	5.3			-5	17
LVC111	1	C	2022-11-22	-5.5		1.2		1.7	2.9	3.9			-2	18
LVC111	1	A	2022-12-15	-11	-0.3	1.4		1.9	2.5	2.8		96.4	-6	35
LVC111	1	B	2022-12-15	-11	-0.6	1.1		1.7	2.4	3		97.2	-6	32
LVC111	1	C	2022-12-15	-11	-0.6	0.6		0.9	1.4	1.9		84.8	-5	35
LVC112	1	A	2021-01-18	-7.8	-2.6	1.2		1.9	2.9	3.6		67.2	-4	12
LVC112	1	B	2021-01-18	-7.8	-2.3	1.3		2.4	3.7	4.2		61.4	10	13
LVC112	1	C	2021-01-18	-7.8	-2.7	0.7		1.5	2.6	3.3		50.8	-4	15
LVC112	1	A	2021-02-17	-12.6	-4.1	0.6		1.1	2.2	2.7		32	-63	30
LVC112	1	B	2021-02-17	-12.6	-5.1	0.1		0.8	2.3	2.9		33.1	-48	26
LVC112	1	C	2021-02-17	-12.6	-5.1	-0.1		0	1.5	2.3		7.7	-50	21
LVC112	1	A	2021-03-18	-1.3	1.2	0.5		0.9	1.8	2.3		55.4	-20	9
LVC112	1	B	2021-03-18	-1.3	1	1		1.4	2.1	2.6		69.8	-14	4
LVC112	1	C	2021-03-18	-1.3	0.4	0		0.3	1.2	1.6		42.7	-13	3
LVC112	1	A	2021-04-21	9.6		5.4		5.7	4.6	4.7		71.8	-29	0
LVC112	1	B	2021-04-21	9.6		6.6		6.4	4.9	4.9		67.3	-22	0
LVC112	1	C	2021-04-21	9.6		6.4		6.8	4.8	4.8		70.3	-21	0
LVC112	1	0	2021-05-20	10.3									-61
LVC112	1	A	2021-05-20	10.3		9.4		9.4	8.6	8.3		73.4	-16	0
LVC112	1	B	2021-05-20	10.3		8.9		8.8	7.9	7.6		73.8	-9	0
LVC112	1	C	2021-05-20	10.3		9		9	8.1	7.9		70.6	-9	0
LVC112	1	0	2021-06-18	20.2									-78
LVC112	1	A	2021-06-18	20.2		13.8		12.7	11.3	10.6		64.1	-44	0
LVC112	1	B	2021-06-18	20.2		13.4		12.1	10.4	9.6		67.7	-34	0
LVC112	1	C	2021-06-18	20.2		13.7		12.5	10.9	10.7		70.8	-30	0
LVC112	1	0	2021-07-20	21.7									-97
LVC112	1	A	2021-07-20	21.7		16.6		16.2	15.5	15		61.1	-59	0
LVC112	1	B	2021-07-20	21.7		15.3		14.2	13.5	12.9		25.3	-73	0
LVC112	1	C	2021-07-20	21.7		16.6		16.2	15.4	15		64.9	-54	0
LVC112	1	0	2021-08-25	10.4									-95
LVC112	1	A	2021-08-25	10.4		12		12.6	12.4	12.4		66.5	-56	0
LVC112	1	B	2021-08-25	10.4		10.7		11.5	11.3	11.2		39.8	-80	0
LVC112	1	C	2021-08-25	10.4		11.7		12.5	12.3	12.4		69.5	-46	0
LVC112	1	0	2021-09-24	8.5									-90
LVC112	1	A	2021-09-24	8.5		8.3		8.8	8.8	9.3		73.2	-28	0
LVC112	1	B	2021-09-24	8.5		8.4		9	9.2	9.6		52.7	-41	0
LVC112	1	C	2021-09-24	8.5		8.4		8.9	9.1	9.6		72.1	-30	0
LVC112	1	0	2021-10-21	12.2									-66
LVC112	1	A	2021-10-21	12.2		7.6		7.1	6.9	7.5		65.6	-41	0
LVC112	1	B	2021-10-21	12.2		8.4		7.9	7.7	8.3		48.3	-47	0
LVC112	1	C	2021-10-21	12.2		7.9		7.5	7.3	7.9		70	-45	0
LVC112	1	0	2021-11-25	4.5									-72
LVC112	1	A	2021-11-25	4.5		2.5		3.7	4.3	5.3		72.4	-24	0
LVC112	1	B	2021-11-25	4.5		3.6		4.8	5.2	6.2		63.7	-21	0
LVC112	1	C	2021-11-25	4.5		3.6		4.3	4.8	5.5		72.3	-22	0
LVC112	1	0	2021-12-16	2									-64
LVC112	1	A	2021-12-16	2		1.5		2.3	2.6	3.7		72.5	-21	15
LVC112	1	B	2021-12-16	2		1.8		3.3	3.5	4.6		55.9	-16	17
LVC112	1	C	2021-12-16	2		1.6		2.7	3.1	4		72	-18	14
LVC112	1	0	2022-01-26	-4.4									-66
LVC112	1	A	2022-01-26	-4.4		1.4		1.6	1.9	2.7			-23	23
LVC112	1	B	2022-01-26	-4.4		1.7		2	2.8	3.5			-17	22
LVC112	1	C	2022-01-26	-4.4		1.1		1.4	1.8	2.5			-21	16
LVC112	1	0	2022-02-23	-0.9									-40
LVC112	1	A	2022-02-23	-0.9		0.8		0.6	1.5	2.5			-3	27
LVC112	1	B	2022-02-23	-0.9		1.3		0	1.9	2.8			-2	40
LVC112	1	C	2022-02-23	-0.9		0.8		0.5	1.6	2.4			0	32
LVC112	1	0	2022-03-23	7.5									-49
LVC112	1	A	2022-03-23	7.5		0.5		1.3	1	1.7			-5	0
LVC112	1	B	2022-03-23	7.5		0.6		0.9	1.3	2			3	0
LVC112	1	C	2022-03-23	7.5		0.1		0.3	0.8	1.5			-1	0
LVC112	1	0	2022-04-27	3.5									-61
LVC112	1	A	2022-04-27	3.5	3.8	4.6		4.2	5.4	5.2		98.2	-13	0
LVC112	1	B	2022-04-27	3.5	4.2	5.2		4.7	5.8	5.5		93.4	-7	0
LVC112	1	C	2022-04-27	3.5	4.6	5.2		4.7	5.9	5.7		99.4	-7	0
LVC112	1	0	2022-05-26	13.8									-51
LVC112	1	A	2022-05-26	13.8	11.2	11.3		11.7	9.4	7.9		97.9	-9	0
LVC112	1	B	2022-05-26	13.8	11	10.9		11.6	8.8	7.4		96.2	-5	0
LVC112	1	C	2022-05-26	13.8	11.7	11.3		12	9.5	8.1		95.9	-8	0
LVC112	1	0	2022-06-27	31									-70
LVC112	1	A	2022-06-27	31	19.1	19		16.5	14.4	12.3		94.1	-24	0
LVC112	1	B	2022-06-27	31	18.8	17.1		14.9	12.8	11		93.9	-19	0
LVC112	1	C	2022-06-27	31	19.8	18.2		16.3	14.2	12.1		94.6	-21	0
LVC112	1	0	2022-07-22	27									-83
LVC112	1	A	2022-07-22	27	16.9	17		16.3	14.8	13.7		95.6	-28	0
LVC112	1	B	2022-07-22	27	16	15.7		15.2	13.6	12.7		94.1	-21	0
LVC112	1	C	2022-07-22	27	16	16.1		15.9	14.4	13.7		95.2	-22	0
LVC112	1	0	2022-08-24	23.7									-91
LVC112	1	A	2022-08-24	23.7	17	17.2		17	15.8	14.6		36.8	-52	0
LVC112	1	B	2022-08-24	23.7	16.8	17.4		16.8	15	13.7		92.9	-40	0
LVC112	1	C	2022-08-24	23.7	16.7	17.5		17	16	14.5		5.5	-38	0
LVC112	1	0	2022-09-22	9.8									-84
LVC112	1	A	2022-09-22	9.8	9.4	10.6		10.9	10.9	9.7		88.5	-29	0
LVC112	1	B	2022-09-22	9.8	9.5	10.7		11	11.1	9.8		94.6	-17	0
LVC112	1	C	2022-09-22	9.8	9.3	10.6		10.9	11	9.8		94.9	-19	0
LVC112	1	0	2022-10-26	11									-64
LVC112	1	A	2022-10-26	11	7.7	7.4		7.3	7.5	7.8		96.4	-18	0
LVC112	1	B	2022-10-26	11	7.7	7.7		7.7	7.9	8.4		95.6	-8	0
LVC112	1	C	2022-10-26	11	7.4	7.4		7.4	7.6	8		97.2	-7	0
LVC112	1	0	2022-11-24	-3.4									-73
LVC112	1	A	2022-11-24	-3.4	2	2.5		2.9	4.5	5.4		98.2	-19	15
LVC112	1	B	2022-11-24	-3.4	1.2	2.6		3.9	5.3	5.8		97.2	-14	14
LVC112	1	C	2022-11-24	-3.4	3.6	3		3.8	4.9	5.8		97.6	-12	15
LVC112	1	0	2022-12-15	-14.1									-79
LVC112	1	A	2022-12-15	-14.1	0.5	1.5		2	3.3	3.8		90.6	-30	37
LVC112	1	B	2022-12-15	-14.1	0.5	1.7		2.2	3	4		47.5	-19	39
LVC112	1	C	2022-12-15	-14.1	2.1	2.7		2.9	3.3	4.5		40.7	-20	38
LVC115	1	A	2021-01-14	-8.1	-0.1	1.7		2.2	2.8	3.5		45.7	-98	20
LVC115	1	B	2021-01-14	-8.1	-1.7	0.9		1.4	2.3	2.9		35.2	-90	19
LVC115	1	C	2021-01-14	-8.1	-1.3	0.9		1.9	2.7	3.2		60	-85	19
LVC115	1	A	2021-02-10	-12.2	-4.7	-0.3		0.2	0.2	0.3		8.1	-98	21
LVC115	1	B	2021-02-10	-12.2	-4.9	-0.3		1.2	1.5	1.6		7.7	-98	26
LVC115	1	C	2021-02-10	-12.2	-4.3	-0.1		1.9	2.1	2.2		14.5	-87	20
LVC115	1	A	2021-03-11	-1.6	0.6	-0.1		0	0.7	1.5		18.7	-84	15
LVC115	1	B	2021-03-11	-1.6	0.6	-0.1		0	0.6	1.4		7	-83	20
LVC115	1	C	2021-03-11	-1.6	0.9	-0.1		0.2	0.9	1.7		4.2	-78	20
LVC115	1	A	2021-04-12	15.9		4		4.3	2.6	2.6		50.7	-64	0
LVC115	1	B	2021-04-12	15.9		3.1		3.4	2.1	2.2		50.1	-63	0
LVC115	1	C	2021-04-12	15.9		4.2		5.2	2.4	2.4		58.2	-54	0
LVC115	1	A	2021-05-14	9.8		9.8		9.1	7.8	7.1		52.3	-62	0
LVC115	1	B	2021-05-14	9.8		9.2		8.3	7.2	7		56.7	-64	0
LVC115	1	C	2021-05-14	9.8		10		9.3	7.9	7.7		49.1	-55	0
LVC115	1	A	2021-06-14	18.6		13.3		13.2	12.2	11.6		38	-80	0
LVC115	1	B	2021-06-14	18.6		13		12.8	11.6	11		55.3	-90	0
LVC115	1	C	2021-06-14	18.6		14.1		13.2	11.9	11.1		42	-72	0
LVC115	1	A	2021-07-15	25.5		19.2		18.4	16.9	15.9		11.4	-131	0
LVC115	1	B	2021-07-15	25.5		19		17.8	16.5	15.6		20.3	-135	0
LVC115	1	C	2021-07-15	25.5		19.4		18	16.4	15.8		32.7	-119	0
LVC115	1	A	2021-08-16	19.4		15.7		16.2	15.7	15.4		30.8	-140	0
LVC115	1	B	2021-08-16	19.4		15.4		15.6	15.2	14.8		22.3	-138	0
LVC115	1	C	2021-08-16	19.4		15.8		15.5	15.1	14.8		42.3	-142	0
LVC115	1	A	2021-09-14	10.3		12.8		13.9	13.6	13.6		34.2	-140	0
LVC115	1	B	2021-09-14	10.3		12.3		13.4	13.1	13		42.8	-140	0
LVC115	1	C	2021-09-14	10.3		12.5		13.4	13.2	13.2		47	-127	0
LVC115	1	A	2021-10-13	6		7		8.3	8.4	9.2		25.6	-145	0
LVC115	1	B	2021-10-13	6		6.2		7.4	7.6	8.5		51	-140	0
LVC115	1	C	2021-10-13	6		6.9		8	8.2	8.9		44.4	-126	0
LVC115	1	A	2021-11-11	6.3		5		5.7	6	6.7		44.6	-96	0
LVC115	1	B	2021-11-11	6.3		4.6		5.3	5.6	6.4		47.4	-72	0
LVC115	1	C	2021-11-11	6.3		5.2		5.9	6.1	7.1		55.4	-81	0
LVC115	1	A	2021-12-08	-14.1		1.5		2.6	2.6	3.9		40.5	-86	21
LVC115	1	B	2021-12-08	-14.1		1.5		2.5	2.8	3.7		32.9	-73	23
LVC115	1	C	2021-12-08	-14.1		1.9		2.7	3.2	4.2		44.3	-73	18
LVC115	1	A	2022-01-12	-8		-0.2		0.5	0.9	2			-67	10
LVC115	1	B	2022-01-12	-8		0.1		0.5	0.9	1.7			-78	12
LVC115	1	C	2022-01-12	-8		-0.1		0.8	1.3	2.2			-63	11
LVC115	1	A	2022-02-15	1.7									-38	22
LVC115	1	B	2022-02-15	1.7									-65	22
LVC115	1	C	2022-02-15	1.7									-47	16
LVC115	1	A	2022-03-14	9									-61	20
LVC115	1	B	2022-03-14	9									-72	25
LVC115	1	C	2022-03-14	9									-53	18
LVC115	1	A	2022-04-13	10.9	0.7	1.2		3.3	1.1	1.4		68.3	-44	0
LVC115	1	B	2022-04-13	10.9	-1	0.1		0.6	0.4	1.1		35.6	-49	0
LVC115	1	C	2022-04-13	10.9	2.3	1.9		3.8	1.6	1.8		90.3	-26	0
LVC115	1	A	2022-05-17	11.4	7.2	7.7		8	7.2	6.7		34.2	-65	0
LVC115	1	B	2022-05-17	11.4	6.2	6.5		6.9	6.1	5.6		85.3	-67	0
LVC115	1	C	2022-05-17	11.4	7.3	7.8		7.9	7.4	6.8		70.2	-50	0
LVC115	1	A	2022-06-09	18.2	14.5	13.9		14.9	11.6	10.2		47.5	-66	0
LVC115	1	B	2022-06-09	18.2	13.3	12.9		13.1	10.7	9.1		77.2	-69	0
LVC115	1	C	2022-06-09	18.2	14.1	13.5		14	11.1	9.9		37.1	-48	0
LVC115	1	A	2022-07-11	19	13.9	14.6		15	14.4	13.9		31.6	-100	0
LVC115	1	B	2022-07-11	19	13.7	14.4		14.5	13.8	13.1		34.1	-111	0
LVC115	1	C	2022-07-11	19	14	14.4		14.6	14.2	13.6		33	-81	0
LVC115	1	A	2022-08-10	19.9	13.8	14.7		15	14.5	14		33.3	-124	0
LVC115	1	B	2022-08-10	19.9	14	14.3		14.7	14.3	13.7		32.1	-134	0
LVC115	1	C	2022-08-10	19.9	14.3	14.5		14.7	14.4	13.8		33.5	-100	0
LVC115	1	A	2022-09-12	10.2	9.5	10.8		11.5	11.7	12		10.7	-137	0
LVC115	1	B	2022-09-12	10.2	9.1	10.4		10.9	11.2	11.6		12.4	-141	0
LVC115	1	C	2022-09-12	10.2	9.3	10.6		11.2	11.5	11.8		30.8	-128	0
LVC115	1	A	2022-10-12	6.2	7.3	8.3		8.9	9.5	9.8		35.8	-143	0
LVC115	1	B	2022-10-12	6.2	6.9	7.7		8.4	9	9.5		75.1	-141	0
LVC115	1	C	2022-10-12	6.2	7.1	8		8.8	9.3	9.7		60.3	-143	0
LVC115	1	A	2022-11-14	0.4	6.2	6.9		7.9	8.6	8.8		72.1	-142	0
LVC115	1	B	2022-11-14	0.4	5.1	5.7		7.4	8.3	8.5		88	-136	0
LVC115	1	C	2022-11-14	0.4	5.7	6.9		8	8.7	8.7		87.3	-119	0
LVC115	1	A	2022-12-08	-0.9	1.2	2.2		2.9	4	4.5		39	-143	27
LVC115	1	B	2022-12-08	-0.9	0	1.6		2.2	3	3.8		54.1	-142	27
LVC115	1	C	2022-12-08	-0.9	0.7	2.1		3	3.7	4.6		53.4	-108	25
LVC116	1	A	2021-01-20	-10.2	-2	-0.3		1.7	2.8	3.4		18.5	-6	8
LVC116	1	B	2021-01-20	-10.2	-4.2	-0.2		1.5	2.2	3.5		17.3	-5	6
LVC116	1	C	2021-01-20	-10.2	-5.2	-0.6		1.9	2.8	3.5		12.8	-7	7
LVC116	1	A	2021-02-22	3.3	2.3	-0.1		0	1.5	2.3		11.8	-40	16
LVC116	1	B	2021-02-22	3.3	1.2	-0.2		-0.1	1.2	2		14.8	-48	17
LVC116	1	C	2021-02-22	3.3	0.7	-0.1		0.1	1.4	2		8.9	-39	16
LVC116	1	A	2021-03-19	-2.7	0.2	0		0.6	1.9	2.2		16.7	-27	7
LVC116	1	B	2021-03-19	-2.7	-0.2	-0.1		0.3	1.7	2		4.3	-34	7
LVC116	1	C	2021-03-19	-2.7	-0.3	-0.1		0.4	1.5	1.8		15.6	-37	7
LVC116	1	0	2021-04-22	7.5									-84
LVC116	1	A	2021-04-22	7.5		4.5		4.4	3.9	3.9		24.1	-33	0
LVC116	1	B	2021-04-22	7.5		4.5		4.4	3.8	3.8		12.2	-39	0
LVC116	1	C	2021-04-22	7.5		4.6		4.5	3.9	3.9		24.5	-30	0
LVC116	1	0	2021-05-21	10.2									-28
LVC116	1	A	2021-05-21	10.2		7.8		7.7	6.4	6.2		47.7	-31	0
LVC116	1	B	2021-05-21	10.2		7.8		7.4	6.6	6.5		21.8	-40	0
LVC116	1	C	2021-05-21	10.2		7.7		7	6.3	6.3		30.8	-25	0
LVC116	1	0	2021-06-19	26.2									-32
LVC116	1	A	2021-06-19	26.2		14.5		12	10	9.5		22.4	-38	0
LVC116	1	B	2021-06-19	26.2		16		12.3	10.1	9.5		11	-44	0
LVC116	1	C	2021-06-19	26.2		15.2		11.5	9.9	9.2		15.1	-35	0
LVC116	1	0	2021-07-22	19.5									-31
LVC116	1	A	2021-07-22	19.5		14.3		14.2	13.7	13.1		19.5	-40	0
LVC116	1	B	2021-07-22	19.5		15		14.2	13.5	13.2		4.6	-47	0
LVC116	1	C	2021-07-22	19.5		15		14.5	13.5	13		11.9	-34	0
LVC116	1	0	2021-08-24	13.1									-27
LVC116	1	A	2021-08-24	13.1		11.6		11.8	11.6	11.6		21.7	-35	0
LVC116	1	B	2021-08-24	13.1		11.4		11.6	11.6	11.7		20.4	-42	0
LVC116	1	C	2021-08-24	13.1		11.7		12.3	12.1	12.2		19	-33	0
LVC116	1	0	2021-09-27	11.5									-28
LVC116	1	A	2021-09-27	11.5		7.7		9.1	9.1	9.4		35.7	-30	0
LVC116	1	B	2021-09-27	11.5		7.3		9	9.2	9.4		23.7	-37	0
LVC116	1	C	2021-09-27	11.5		7.8		9.4	9.4	9.8		29.8	-33	0
LVC116	1	0	2021-10-20	9.2									-32
LVC116	1	A	2021-10-20	9.2		5.3		6.5	7.5	7.5		39	-38	0
LVC116	1	B	2021-10-20	9.2		5.4		6.5	7.4	7.4		19.4	-41	0
LVC116	1	C	2021-10-20	9.2		5.6		7	7.5	8.1		35.5	-37	0
LVC116	1	A	2021-11-23	-2		1.1		4.4	4.7	5.8		37.3	-28	2
LVC116	1	B	2021-11-23	-2		1.5		3.5	4.6	5.7		19.4	-34	1
LVC116	1	C	2021-11-23	-2		2.2		5.2	5.4	6.4		30.2	-30	1.5
LVC116	1	A	2021-12-17	0.8		1.2		2.6	3.2	4.1		53.6	-22	12
LVC116	1	B	2021-12-17	0.8		0.4		2.2	2.7	3.9		30	-24	9
LVC116	1	C	2021-12-17	0.8		1.6		2.7	3.1	3.9		38.1	-28	10
LVC116	1	B	2022-01-27	0.7		1.7		2.2	2.4	3.1			-21	24
LVC116	1	C	2022-01-27	0.7		0.2		1.1	1.9	2.6			-28	26
LVC116	1	A	2022-01-27	0.7		0.4		1.1	1.9	2.6			-20	25
LVC116	1	A	2022-02-22	1.5		1.6		1	2	2.5			-7	47
LVC116	1	B	2022-02-22	1.5		1.7		1.2	2	2.7			-10	45
LVC116	1	C	2022-02-22	1.5		1.2		0.7	1.6	2.1			-3	49
LVC116	1	A	2022-03-23	10.2		0.9		1.1	1.5	2.1			-15	36
LVC116	1	B	2022-03-23	10.2		0		0	0.9	1.5			-22	37
LVC116	1	C	2022-03-23	10.2		-0.1		0.5	0.7	1.6			-7	31
LVC116	1	A	2022-04-26	11.3	6.7	5.3		7.2	4.4	3.9		99.9	-4	0
LVC116	1	B	2022-04-26	11.3	6.4	5.2		7	4.3	3.9		91.9	-10	0
LVC116	1	C	2022-04-26	11.3	7.8	6		6.3	5.3	4.9		87.5	-2	0
LVC116	1	A	2022-05-27	11.3	10.6	11		11.2	9	8.2		96.7	-2	0
LVC116	1	B	2022-05-27	11.3	9.7	10.3		10.5	8.7	7.8		94.8	-6	0
LVC116	1	C	2022-05-27	11.3	10	10.6		10.8	9.2	8.4		95.7	-2	0
LVC116	1	A	2022-06-28	31.3	19.6	19.1		17.1	14.9	13.8		95.6	-7	0
LVC116	1	B	2022-06-28	31.3	20.8	19.7		17.9	16.1	14.7		87.7	-11	0
LVC116	1	C	2022-06-28	31.3	21.3	19.4		17.6	15.9	14.4		86.3	-3	0
LVC116	1	A	2022-07-25	24.7	18.7	17.8		16.8	15.5	14.6		96.1	-6	0
LVC116	1	B	2022-07-25	24.7	18.9	17.8		17.3	16.4	15.9		72.1	-10	0
LVC116	1	C	2022-07-25	24.7	19.4	18		17.3	16.4	15.7		66.6	-3	0
LVC116	1	A	2022-08-25	20.9	18.3	18.5		17.5	16.3	15.1		41.3	-16	0
LVC116	1	B	2022-08-25	20.9	18.7	19.1		18.1	17.1	16		51.3	-20	0
LVC116	1	C	2022-08-25	20.9	18.6	18.9		18.3	17.3	16.2		44.6	-10	0
LVC116	1	A	2022-09-21	10.5	9.3	10.5		10.9	11	10		91.1	-11	0
LVC116	1	B	2022-09-21	10.5	9.3	10.5		11.2	11.3	10.4		53.4	-15	0
LVC116	1	C	2022-09-21	10.5	10	11.2		11.7	11.8	10.9		63.7	-9	0
LVC116	1	A	2022-10-24	6.3	4.7	5.4		6.3	6.9	7.2		96.4	-5	0
LVC116	1	B	2022-10-24	6.3	4.9	5.7		6.2	6.7	7.1		65.5	-12	0
LVC116	1	C	2022-10-24	6.3	5.5	6.2		6.6	7	7.3		96.6	-5	0
LVC116	1	A	2022-11-23	-4	0.9	2.8		3.4	4.2	5.1		98.1	-7	17
LVC116	1	B	2022-11-23	-4	0.5	2.7		3.6	4.3	4.8		92.4	0	18
LVC116	1	C	2022-11-23	-4	1.2	2.4		3.2	4.1	4.6		96.1	-4	18
LVC116	1	A	2022-12-21	0.9	0.2	1.8		1.7	2.5	3.2		97.7	-6	33
LVC116	1	B	2022-12-21	0.9	0.1	2.1		2.2	3.2	3.5		95.1	-9	34
LVC116	1	C	2022-12-21	0.9	0.9	2.4		2.8	3.2	3.7		99.9	-5	33
LVC308	1	A	2021-01-21	-4.7	3	0		1.5	2.4	3.1		17.1	-17	14
LVC308	1	B	2021-01-21	-4.7	-0.2	-0.1		1	2.2	3		11.4	-3	10
LVC308	1	C	2021-01-21	-4.7	-1	0.2		1.3	2.1	2.7		14.9	-5	13
LVC308	1	A	2021-02-16	-3.3	-1.3	-0.1		0.4	1.4	2.2		11	-54	15
LVC308	1	B	2021-02-16	-3.3	-1.8	-1.1		-0.5	0.8	1.5		8.4	-69	15
LVC308	1	C	2021-02-16	-3.3	-1.5	-0.2		0.4	1.6	2.1		9.5	-59	21
LVC308	1	A	2021-03-17	-2.1	2	0		0.3	1.3	1.9		15.9	-31	4
LVC308	1	B	2021-03-17	-2.1	0.5	-0.1		0.1	1	1.5		20.9	-45	4
LVC308	1	C	2021-03-17	-2.1	0.2	-0.1		0.3	1.2	1.8		15.4	-41	11
LVC308	1	A	2021-04-16	7		2.8		2.8	2.1	2.2		42.7	-23	0
LVC308	1	B	2021-04-16	7		1.5		1.1	1.4	1.6		34.9	-42	0
LVC308	1	C	2021-04-16	7		3.3		3.3	2.4	2.4		53.5	-32	0
LVC308	1	A	2021-05-19	10.3		9		7.6	6.3	6.2		38.8	-28	0
LVC308	1	B	2021-05-19	10.3		9.7		8.4	6.9	6.4		35.5	-43	0
LVC308	1	C	2021-05-19	10.3		9.2		7.8	6.3	5.9		49.6	-35	0
LVC308	1	A	2021-06-15	19.9		13		10.9	9.5	9		39.4	-36	0
LVC308	1	B	2021-06-15	19.9		12.9		11.4	9.8	9.3		29.7	-50	0
LVC308	1	C	2021-06-15	19.9		12.6		10.8	9.5	9		51.4	-42	0
LVC308	1	A	2021-07-19	19.9		16.5		16.4	15.2	14.6		31.6	-75	0
LVC308	1	B	2021-07-19	19.9		16.3		16.1	15	14.7		17.8	-90	0
LVC308	1	C	2021-07-19	19.9		16.7		16.6	15.2	14.8		37.8	-83	0
LVC308	1	A	2021-08-20	15.8		14		14	13.6	13.3		40.8	-82	0
LVC308	1	B	2021-08-20	15.8		13.9		14	13.4	13.2		31.1	-104	0
LVC308	1	C	2021-08-20	15.8		14.1		14.2	13.9	13.6		52	-60	0
LVC308	1	A	2021-09-22	7.6		8.1		9.3	9.5	10.1		28.4	-85	0
LVC308	1	B	2021-09-22	7.6		7.5		8.9	9.3	9.9		26.7	-87	0
LVC308	1	C	2021-09-22	7.6		8.2		9.1	9.4	9.9		37.6	-77	0
LVC308	1	A	2021-10-25	5.7		5.9		7.1	7.3	8		31.2	-97	0
LVC308	1	B	2021-10-25	5.7		5.3		6.5	7.1	7.7		36.9	-107	0
LVC308	1	C	2021-10-25	5.7		5.6		6.5	6.8	7.5		46.2	-73	0
LVC308	1	A	2021-11-22	-2.1		2.6		4.9	5.3	6		38.9	-47	0
LVC308	1	B	2021-11-22	-2.1		2		4.5	5.1	5.9		25.5	-57	0
LVC308	1	C	2021-11-22	-2.1		2.6		4.5	5.1	5.7		41.3	-49	0
LVC308	1	A	2021-12-15	0.8		1.7		2.6	2.9	3.8		38.5	-43	18
LVC308	1	B	2021-12-15	0.8		1		2.2	2.5	3.7		32.6	-56	18
LVC308	1	C	2021-12-15	0.8		1.5		2.4	2.2	3.5		50.6	-49	18
LVC308	1	A	2022-01-25	0.7		-0.1		0.5	1.1	1.9			-38	7
LVC308	1	B	2022-01-25	0.7		0.4		1.2	1.7	2.2			-50	8
LVC308	1	C	2022-01-25	0.7		1.2		1.7	2	2.6			-38	17
LVC308	1	A	2022-02-21	0.3		0.3		0	1.6	2.2			-21
LVC308	1	B	2022-02-21	0.3		0.3		0	1.3	2			-34	22
LVC308	1	C	2022-02-21	0.3		1.1		0.6	1.9	2.4			-25	32
LVC308	1	A	2022-03-22	6.8									-27	8
LVC308	1	B	2022-03-22	6.8		0		0	0.8	1.4			-42	5
LVC308	1	C	2022-03-22	6.8		0.5		0	1.3	2.1			-31	24
LVC308	1	A	2022-04-25	7.4	4.5	4		4.5	3.1	3		94.6	-10	0
LVC308	1	B	2022-04-25	7.4	5.7	4.8		5.6	3	3		34.2	-26	0
LVC308	1	C	2022-04-25	7.4	5.5	4.4		5.1	2.7	2.7		95.4	-16	0
LVC308	1	A	2022-05-24	15.2	7.2	7.3		7.8	6.4	6		73.1	-17	0
LVC308	1	B	2022-05-24	15.2	7.6	8		8.3	6.6	5.8		35.7	-31	0
LVC308	1	C	2022-05-24	15.2	6.8	6.9		7.4	5.7	5.3		88.3	-23	0
LVC308	1	A	2022-06-20	15.7	10.9	11.3		11.5	10.1	9.8		88.5	-18	0
LVC308	1	B	2022-06-20	15.7	12.1	11.9		12.7	10.2	9.5		34	-32	0
LVC308	1	C	2022-06-20	15.7	11.4	11		11.6	9.3	9		74.1	-24	0
LVC308	1	A	2022-07-19	19.5	14.7	14		13.1	12.7	12.3		66.4	-21	0
LVC308	1	B	2022-07-19	19.5	15.7	14.9		13.6	12.8	12.3		37.2	-35	0
LVC308	1	C	2022-07-19	19.5	15.7	14.1		12.8	11.9	11.7		88.8	-28	0
LVC308	1	A	2022-08-22	22.6	17.6	16.6		15.6	14.7	13.8		7.8	-43	0
LVC308	1	B	2022-08-22	22.6	18.4	17.7		16.3	15.4	14.4		5.7	-55	0
LVC308	1	C	2022-08-22	22.6	18	17		15.8	14.7	13.4		77.2	-47	0
LVC308	1	A	2022-09-19	12.3	10.4	11.1		11.2	11.3	10.9		41.5	-35	0
LVC308	1	B	2022-09-19	12.3	10.6	11.2		11.5	11.5	11.1		32.9	-48	0
LVC308	1	C	2022-09-19	12.3	10.7	11.1		11	11	10.6		86.5	-38	0
LVC308	1	A	2022-10-20	3.5	5.4	7.3		8.5	9.1	9.2		57.9	-28	0
LVC308	1	B	2022-10-20	3.5	4.4	6.1		8	9.1	9.3		30.6	-41	0
LVC308	1	C	2022-10-20	3.5	4.2	6.9		8.1	8.8	9		86	-34	0
LVC308	1	A	2022-11-25	-3.3	1.7	3.6		4.6	5.7	6.2		70.2	-28	10
LVC308	1	B	2022-11-25	-3.3	1.2	2.5		4	5.3	6		80.4	-44	12
LVC308	1	C	2022-11-25	-3.3	1.6	3.2		4.4	5.4	6.4		85.8	-33	10
LVC308	1	A	2022-12-15	-10	0.5	1.9		2.6	3.7	4.3		48	-34	30
LVC308	1	B	2022-12-15	-10	-1	0.2		2.1	2.7	3.8		52	-48	30
LVC308	1	C	2022-12-15	-10	0.6	1.8		2.4	3.3	4.2		48	-40	32
LVC309	1	A	2021-01-20	-8	-2	0		0.7	1.6	2.2		8.2	-63	9
LVC309	1	B	2021-01-20	-8	-2.6	0.1		1.1	1.8	2.2		15.1	-100	10
LVC309	1	C	2021-01-20	-8	-3.9	-0.2		0.3	0.9	1.4		8.9	-96	9
LVC309	1	A	2021-02-15	-8.9	-3.5	-0.3		-0.3	0.3	0.9		8	-19	18
LVC309	1	B	2021-02-15	-8.9	-4.3	-0.1		0.2	0.8	1.3		7.7	-20	17
LVC309	1	C	2021-02-15	-8.9	-3.1	-0.4		-0.2	0.4	0.7		8.4	-25	19
LVC309	1	A	2021-03-16	2.8	1.5	-0.1		-0.1	0.2	0.6		10.5	-5	7
LVC309	1	B	2021-03-16	2.8	0.6	0		0.1	0.6	0.9		65.2	-7	0
LVC309	1	C	2021-03-16	2.8	0.4	0.3		0.4	0.7	1		73.7	-7	0
LVC309	1	A	2021-04-15	7.8		0.4		0.3	0.8	1.1		78.2	-6	0
LVC309	1	B	2021-04-15	7.8		1.1		1.2	1	1.2		78.4	-9	0
LVC309	1	C	2021-04-15	7.8		1.3		1.4	2.1	2.2		76.1	0	0
LVC309	1	A	2021-05-17	14.2		9.5		8.2	6.7	6.3		77.2	-3	0
LVC309	1	B	2021-05-17	14.2		8.4		8.3	5.7	5.3		76.6	-8	0
LVC309	1	C	2021-05-17	14.2		10.2		8.2	7	6.5		76.1	-5	0
LVC309	1	A	2021-06-16	17.2		11.3		11.1	10.2	9.8		74.4	-10	0
LVC309	1	B	2021-06-16	17.2		11.2		10.8	9.5	9.3		74.6	-16	0
LVC309	1	C	2021-06-16	17.2		12.1		11.6	10.7	10.4		74.3	-12	0
LVC309	1	A	2021-07-16	29.2		20		17.9	16.4	15.1		62.5	-45	0
LVC309	1	B	2021-07-16	29.2		19.4		16.9	15	14.1		30.3	-53	0
LVC309	1	C	2021-07-16	29.2		19.4		17.4	15.7	14.5		62.7	-48	0
LVC309	1	A	2021-08-18	15.2		13.8		14.1	13.7	13.4		75.5	-6	0
LVC309	1	B	2021-08-18	15.2		14		14.2	13.9	13.6		56.1	-10	0
LVC309	1	C	2021-08-18	15.2		14.2		14.4	13.9	13.6		74.5	-7	0
LVC309	1	A	2021-09-22	6.7		7		7.7	8.3	9.2		58.7	-14	0
LVC309	1	B	2021-09-22	6.7		8.2		9.3	9.5	10.1		62	-21	0
LVC309	1	C	2021-09-22	6.7		7.7		8.7	9.1	9.1		74.2	-12	0
LVC309	1	A	2021-10-25	6.5		4.4		5.4	5.9	6.7		77.6	-5	0
LVC309	1	B	2021-10-25	6.5		6.2		7	7	7.6		66.4	-10	0
LVC309	1	C	2021-10-25	6.5		5.1		5.9	6.2	6.8		77.3	-7	0
LVC309	1	A	2021-11-22	-1.7		2.4		3.7	4.1	5		78.2	-3	0
LVC309	1	B	2021-11-22	-1.7		3.7		5	5.2	5.8		77.6	-8	0
LVC309	1	C	2021-11-22	-1.7		2.6		3.7	4.2	4.8		77.9	-3	0
LVC309	1	A	2021-12-15	1.2		1		1.6	1.6	2.7		66.3	-2	16
LVC309	1	B	2021-12-15	1.2		1.5		2.3	2.2	3.1		76.4	-6	19
LVC309	1	C	2021-12-15	1.2		0.6		1.1	1.1	2.2		59.5	-3	21
LVC309	1	A	2022-01-25	0.7		-0.1		0.4	0.5	1.2			-8	10
LVC309	1	B	2022-01-25	0.7		0		0.4	0.7	1.1			-7	10
LVC309	1	C	2022-01-25	0.7		-0.1		0.3	0.3	0.9			-10	13
LVC309	1	A	2022-02-21	-0.1									-4	32
LVC309	1	B	2022-02-21	-0.1		0.1		0	0.3	0.8			-5	38
LVC309	1	C	2022-02-21	-0.1		0		-0.1	0.3	0.8			-2	39
LVC309	1	A	2022-03-22	10.5		0.6		0.6	0.7	1.2			-8	28
LVC309	1	B	2022-03-22	10.5		0.4		1.2	0.6	0.9			-6	30
LVC309	1	C	2022-03-22	10.5									-5	30
LVC309	1	A	2022-04-25	8	7.5	6.9		8	5.8	5.1		99.9	0	0
LVC309	1	B	2022-04-25	8	5.4	4.3		5.9	3.5	3.3		99.9	-5	0
LVC309	1	C	2022-04-25	8		6.1		7.2	5.1	5			3	0
LVC309	1	A	2022-05-23	18.1	17	11.9		14.9	8.7	7.9		99.2	-1	0
LVC309	1	B	2022-05-23	18.1	10.9	8.7		11	7.2	6.7		99.7	-4	0
LVC309	1	C	2022-05-23	18.1	15.4	9.9		11.7	8.1	7.5		99.9	0	0
LVC309	1	A	2022-06-22	20.8	18.3	16.5		19.2	14.4	13.3		98.7	-2	0
LVC309	1	B	2022-06-22	20.8	17.6	14.6		16.1	12.9			98.2	-6	0
LVC309	1	C	2022-06-22	20.8	18.7	15.9		18.7	14.3	13.1		96.2	-1	0
LVC309	1	A	2022-07-19	17.6	17.6	16.5		15.9	15.4	14.9		98.4	-4	0
LVC309	1	B	2022-07-19	17.6	17.5	16.3		15.1	14.9	14.3		99.9	-4	0
LVC309	1	C	2022-07-19	17.6	18.5	17.2		16.5	15.9	15.4		99.2	-2	0
LVC309	1	A	2022-08-22	21.7	18.1	17.9		17.7	17.1	16.3		97.9	-11	0
LVC309	1	B	2022-08-22	21.7	18.1	17.5		16.9	16.5	15.6		97.7	-11	0
LVC309	1	C	2022-08-22	21.7	18.4	18.3		17.7	17.3	16.5		35.7	-12	0
LVC309	1	A	2022-09-19	13.7	10.9	11.5		11.8	11.9	11.9		92.6	-8	0
LVC309	1	B	2022-09-19	13.7	11.7	11.5		11.6	11.7	11.7		99.9	-7	0
LVC309	1	C	2022-09-19	13.7	11.2	11.4		11.6	11.8	11.7		99.6	-10	0
LVC309	1	A	2022-10-19	3.3	7.7	8.4		8.8	9	9		99.9	1	0
LVC309	1	B	2022-10-19	3.3	8	8.3		8.4	8.7	8.7		99.9	-2	0
LVC309	1	C	2022-10-19	3.3	7.1	7.9		8.2	8.5	8.6		99.2	-8	0
LVC309	1	A	2022-11-22	-5.3	0.2	2.1		3	4.2	5.3		95.6	0	18
LVC309	1	B	2022-11-22	-5.3	1.8	2.2		3.1	4.2	4.8		85.3	-9	19
LVC309	1	C	2022-11-22	-5.3	1.4	2.3		3.1	4	5.2		87.1	-36	18
LVC309	1	A	2022-12-19	-7.7	0.3	1.8		1.6	2.7	2.4		92.6	-5	35
LVC309	1	B	2022-12-19	-7.7	-0.3	1.5		1.6	2.3	2.8		87.6	-24	37
LVC309	1	C	2022-12-19	-7.7	0	1.1		1.2	2.3	2.7		88.3	-61	35
LVC311	1	A	2021-01-20	-7.5	-4.7	0.1		0.6	1.2	1.6		12.5	-36	8
LVC311	1	B	2021-01-20	-7.5	-3.9	0.3		0.6	1.1	1.7		38.7	-48	12
LVC311	1	C	2021-01-20	-7.5	-5	-0.1		0.5	1.3	1.8		11.2	-30	10
LVC311	1	A	2021-02-15	-8.7	-2.9	-0.3		0	0.7	1.2		9.6	-21	20
LVC311	1	B	2021-02-15	-8.7	-2.7	-0.1		0.1	0.9	1.3		9.4	-14	13
LVC311	1	C	2021-02-15	-8.7	-2.2	-0.2		0	0.9	1.3		9.3	-15	20
LVC311	1	A	2021-03-16	2.7	1.7	0		0	0.5	0.8		24.8	-7	5
LVC311	1	B	2021-03-16	2.7	1.3	-0.1		0.1	0.5	0.8		19	-6	8
LVC311	1	C	2021-03-16	2.7		-0.1		-0.1	0.6	0.8			-1	7
LVC311	1	A	2021-04-15	8.5		2.2		2.4	1.5	1.6		74.5	-5	0
LVC311	1	B	2021-04-15	8.5		1.3		1.3	1	1.1		76.3	0	0
LVC311	1	C	2021-04-15	8.5		2.7		2.7	1.9	2		79.1	-1	0
LVC311	1	A	2021-05-17	13.9		9.4		8.1	6.7	6.4		70.1	-7	0
LVC311	1	B	2021-05-17	13.9		9		7.9	6.5	6.3		75.8	1	0
LVC311	1	C	2021-05-17	13.9		9.8		8.7	7.2	7		78.5	1	0
LVC311	1	A	2021-06-16	16.3		11.6		11.4	10.5	9.9		64.1	-14	0
LVC311	1	B	2021-06-16	16.3		11.6		11.6	10.4	10.1		72.5	-10	0
LVC311	1	C	2021-06-16	16.3		12.2		12.1	11.2	10.8		69.4	-7	0
LVC311	1	A	2021-07-16	28.2		19.5		17.6	15.8	15		51.2	-49	0
LVC311	1	B	2021-07-16	28.2		19.2		17.8	16	14.8		56.5	-49	0
LVC311	1	C	2021-07-16	28.2		19.4		17.8	16	15.2		25.8	-48	0
LVC311	1	A	2021-08-18	13.9		14.1		14.6	14.1	13.8		29.1	-18	0
LVC311	1	B	2021-08-18	13.9		14.4		14.7	14.2	13.9		71.6	-6	0
LVC311	1	C	2021-08-18	13.9		14.3		14.6	14.1	14		65.7	-8	0
LVC311	1	A	2021-09-22	6.1		7.8		8.5	8.6	9.5		60	-8	0
LVC311	1	B	2021-09-22	6.1		7.6		8.7	9.1	9.8		70.6	-12	0
LVC311	1	C	2021-09-22	6.1		7.2		8.2	8.9	9.4		79.5	0	0
LVC311	1	A	2021-10-25	5.4		4.7		5.4	6	6.8		73.8	1	0
LVC311	1	B	2021-10-25	5.4		5.5		6.3	6.7	7.2		76	-2	0
LVC311	1	C	2021-10-25	5.4		6.2		6.8	7.1	7.6		78.9	0	0
LVC311	1	A	2021-11-22	-2		1.9		3.7	4	4.9		76.8	0	0
LVC311	1	B	2021-11-22	-2		3		4.4	4.5	5.2		77.5	-3	0
LVC311	1	C	2021-11-22	-2		4.3		4.8	5.1	5.6		79.1	-3	0
LVC311	1	A	2021-12-15	1		0.9		1.4	1.7	2.4		78.4	-1	13
LVC311	1	B	2021-12-15	1		0.9		1.6	1.7	2.4		76.7	-2	16
LVC311	1	C	2021-12-15	1		1.4		1.7	2	2.9		79.3	-2	9
LVC311	1	A	2022-01-25	1		-0.1		0.3	0.3	1			-4	9
LVC311	1	B	2022-01-25	1		-0.1		0.3	0.3	1			-1	10
LVC311	1	C	2022-01-25	1										12
LVC311	1	A	2022-02-21	0										25
LVC311	1	B	2022-02-21	0		-0.1		-0.1	0.3	0.8			-2	28
LVC311	1	C	2022-02-21	0										25
LVC311	1	A	2022-03-22	9.4										17
LVC311	1	B	2022-03-22	9.4		0.1		0.5	0.2	0.8				17
LVC311	1	C	2022-03-22	9.4										7
LVC311	1	A	2022-04-25	7.2	6.3	5.9		6.9	5.1	4.8		9.99	1	0
LVC311	1	B	2022-04-25	7.2	7.4	6.9		7.9	6	5.5		9.99	0	0
LVC311	1	C	2022-04-25	7.2		6.8		8	6	5.6			5	0
LVC311	1	A	2022-05-23	16.5	12.1	9.3		10.6	8.3	7.6		98.4	0	0
LVC311	1	B	2022-05-23	16.5	13.5	9.5		11.6	8.2	8		99.1	0	0
LVC311	1	C	2022-05-23	16.5	14.3	9.8		13.3	8.7	8		96.6	0	0
LVC311	1	A	2022-06-22	21.5	15.8	14.5		15.6	14.2	13.2		91.6	-2	0
LVC311	1	B	2022-06-22	21.5	16.4	14.8		15.6	14.3	13.4		98.1	-1	0
LVC311	1	C	2022-06-22	21.5	15.6	14.7		15.5	13.8	12.7		99.9	0	0
LVC311	1	A	2022-07-19	19.5	16.9	16.5		16.3	15.8	15.2		96.6	-3	0
LVC311	1	B	2022-07-19	19.5	17.9	16.5		16.4	16	15.6		97.6	0	0
LVC311	1	C	2022-07-19	19.5	17.9	15.9		15.3	15	14.7		99.9	6	0
LVC311	1	A	2022-08-22	19.7	17.9	18		18	17.4	16.4		6.1	-24	0
LVC311	1	B	2022-08-22	19.7	18.3	18.5		18.3	17.9	17		93.9	-13	0
LVC311	1	C	2022-08-22	19.7	18	18.4		18.2	18	17.3		8.9	-21	0
LVC311	1	A	2022-09-19	12.5	10.2	11.1		11.7	11.9	11.8		95.2	-18	0
LVC311	1	B	2022-09-19	12.5	10.8	11.6		12.1	12.3	12.4		98.4	-5	0
LVC311	1	C	2022-09-19	12.5	11.2	12.1		12.7	12.9	13.1		93.6	-23	0
LVC311	1	A	2022-10-19	4.8	7.5	8.4		8.7	8.9	8.9		96.1	-11	0
LVC311	1	B	2022-10-19	4.8	7.3	8.3		8.9	9	9.1		99.4	-2	0
LVC311	1	C	2022-10-19	4.8	7.6	9		9.4	9.7	9.8		89.5	-19	0
LVC311	1	A	2022-11-22	-5.4	1.7	2.5		3.3	4.1	5.5		94.4	-32	18
LVC311	1	B	2022-11-22	-5.4	1.7	2.5		2.9	4.5	5		95.2	-15	15
LVC311	1	C	2022-11-22	-5.4	1.8	2.7		3.6	4.9	5.7		92.3	-40	17
LVC311	1	A	2022-12-19	-3.5	0.1	1.4		1.9	2.7	3.2		96.7	-44	39
LVC311	1	B	2022-12-19	-3.5	0.4	1.5		2	3	3.4		94.8	-25	36
LVC311	1	C	2022-12-19	-3.5	0.4	1.6		2.3	3	3.5		92.1	-50	37
LVC312	1	A	2021-01-20	-8.3	-4.1	-0.1		0.5	1.1	1.6		60.6	-70	8
LVC312	1	B	2021-01-20	-8.3	-1.6	0.2		0.9	1.5	2.1		11.5	-66	14
LVC312	1	C	2021-01-20	-8.3	-3.6	0.1		0.8	1.5	2		14.6	-47	10
LVC312	1	A	2021-02-16	-2.6	-0.4	0		0.2	0.8	1.1		33	-15	24
LVC312	1	B	2021-02-16	-2.6	-0.7	-0.1		0.2	0.9	1.5		15.7	-13	21
LVC312	1	C	2021-02-16	-2.6	-1.1	-0.1		0.1	0.9	1.5		11.2	-14	15
LVC312	1	A	2021-03-17	-2.3	0.4	-0.1		-0.1	0.3	0.6		7.4	-9	11
LVC312	1	B	2021-03-17	-2.3	0.3	-0.1		0	0.5	0.8		14.7	-7	10
LVC312	1	C	2021-03-17	-2.3	0.2	-0.1		-0.1	0.5	0.7		14.2	-10	0
LVC312	1	A	2021-04-16	10.3		2.5		2.5	1.7	1.8		76.5	-10	0
LVC312	1	B	2021-04-16	10.3		2.3		2.6	1.3	1.4		74.7	-10	0
LVC312	1	C	2021-04-16	10.3		0.8		1	1.3	1.8		66.8	-10	0
LVC312	1	A	2021-05-19	10.8		10.2		9.6	8.5	8.3		77.4	-8	0
LVC312	1	B	2021-05-19	10.8		9.7		9.2	8	7.6		76.1	2	0
LVC312	1	C	2021-05-19	10.8		9.4		8.6	7.5	7.2		67.9	-9	0
LVC312	1	A	2021-06-16	20.8		13		12.3	11.6	11.1		73.3	-11	0
LVC312	1	B	2021-06-16	20.8		12.8		12.1	11.1	10.7		60	-14	0
LVC312	1	C	2021-06-16	20.8		13		12.2	10.9	10.7		59.4	-17	0
LVC312	1	A	2021-07-19	20.3		17.8		17.3	16.1	15.5		63	-71	0
LVC312	1	B	2021-07-19	20.3		17.9		17.6	16.5	16.3		37.8	-49	0
LVC312	1	C	2021-07-19	20.3		17.9		17.8	16.6	16.4		51.1	-40	0
LVC312	1	A	2021-08-20	15.7		14.3		14.4	14.1	14		64.4	-38	0
LVC312	1	B	2021-08-20	15.7		14.5		14.6	14.3	14.3		30	-31	0
LVC312	1	C	2021-08-20	15.7		14.6		14.7	14.5	14.5		60.9	-15	0
LVC312	1	A	2021-09-23	9.8		8.3		9.1	9.3	10		71.4	-29	0
LVC312	1	B	2021-09-23	9.8		8.7		9.6	9.7	10.3		37.6	-27	0
LVC312	1	C	2021-09-23	9.8		9		9.7	9.7	10.4		67.1	-20	0
LVC312	1	A	2021-10-22	6.2		7.6		7.7	7.5	7.7		77.7	-7	0
LVC312	1	B	2021-10-22	6.2		7.6		8	7.7	7.8		69.2	-8	0
LVC312	1	C	2021-10-22	6.2		7.7		8	7.8	8		64.6	-8	0
LVC312	1	A	2021-11-23	-1.4		2.2		3.5	3.9	4.6		77.6	-2	2
LVC312	1	B	2021-11-23	-1.4		1.8		3.7	3.9	4.8		66.1	-6	1
LVC312	1	C	2021-11-23	-1.4		2.8		4	4.6	5.3		72.9	-9	1.5
LVC312	1	C	2021-12-15	0.9		0.7		1.2	0.8	1.9		78.4	-7	19
LVC312	1	A	2021-12-15	0.9		1.7		2.5	2	3		66.6	-4	15
LVC312	1	B	2021-12-15	0.9		1.6		2.4	2.1	3.2		70.9	-11	17
LVC312	1	A	2022-01-25	0.5		-0.1		0	-0.1	0.4			-5	22
LVC312	1	B	2022-01-25	0.5		0.4		0.9	0.7	1.5			-9	13
LVC312	1	C	2022-01-25	0.5		0.5		0.9	1.1	1.6			-10	14
LVC312	1	A	2022-02-21	0.3		0.2		-0.4	0.4	0.8			-6	33
LVC312	1	B	2022-02-21	0.3		0.3		-0.2	0.6	1.2			-3	21
LVC312	1	C	2022-02-21	0.3		0.5		0	0.7	1.4			-11	25
LVC312	1	A	2022-03-22	10.4									-5	34
LVC312	1	B	2022-03-22	10.4		0		0.1	0.3	0.8			-1	19
LVC312	1	C	2022-03-22	10.4		0		0.4	0.2	0.8			-4
LVC312	1	A	2022-04-25	8.1	8.2	6.8		7.5	5.7	5.7		99.9	-3	0
LVC312	1	B	2022-04-25	8.1	8.5	7.9		8.1	5.9	5.2		96.2	-3	0
LVC312	1	C	2022-04-25	8.1	7.4	6.3		7.3	4.7	4.2		97.1	-12	0
LVC312	1	A	2022-05-24	19.6	11.7	10.6		6.9	9.4	8.3		99.9	-4	0
LVC312	1	B	2022-05-24	19.6	8.7	12.2		13.2	10.1	8.8		99.6	-3	0
LVC312	1	C	2022-05-24	19.6	10.6	9.6		10.3	8.3	7.5		85.5	-11	0
LVC312	1	A	2022-06-20	21.4	18.7	15.7		17.8	14.7	14.4		98.2	-3	0
LVC312	1	B	2022-06-20	21.4	21.8	17.4		20.5	15.7	14.8		98.6	-3	0
LVC312	1	C	2022-06-20	21.4	18.3	15.3		17.6	13.3	12.3		96.1	-9	0
LVC312	1	A	2022-07-20	16.6	15.5	16.2		16.9	16.3	15.9		99.6	-7	0
LVC312	1	B	2022-07-20	16.6	17.4	17.4		17.7	17.3	16.4		99.9	-3	0
LVC312	1	C	2022-07-20	16.6	16.1	16.2		16.5	15.7	15		96.7	-10	0
LVC312	1	A	2022-08-23	23.2	17.8	18.9		18.8	18	17.1		5.8	-36	0
LVC312	1	B	2022-08-23	23.2	18.2	18.9		18.8	17.9	17.1		11	-18	0
LVC312	1	C	2022-08-23	23.2	18.1	18.6		17.7	18.5	16.6		95.9	-20	0
LVC312	1	A	2022-09-22	12.8	11.3	11.7		11.9	12.2	11.2		96.6	-32	0
LVC312	1	B	2022-09-22	12.8	11.8	11.9		12.1	12.4	11.4		93.8	-19	0
LVC312	1	C	2022-09-22	12.8	11.7	11.7		11.8	12	10.9		97.1	-8	0
LVC312	1	A	2022-10-20	7.1	5.7	6.3		7.8	9.1	9.4		98.7	-10	0
LVC312	1	B	2022-10-20	7.1	6.1	6.6		8.1	9.1	9.5		92.4	-7	0
LVC312	1	C	2022-10-20	7.1	6	6.3		7.8	8.6	9		98.9	-6	0
LVC312	1	A	2022-11-22	-5.3	2.1	2.8		3.7	5.1	6		89.5	-19	18
LVC312	1	B	2022-11-22	-5.3	2.9	3.3		3.9	4.2	6		85.3	-7	20
LVC312	1	C	2022-11-22	-5.3	2.9	2.7		3.6	4.9	5.5		82.4	-11	20
LVC312	1	A	2022-12-20	-6.4	0.4	1.9		2.3	2.8	3.4		92.9	-23	39
LVC312	1	B	2022-12-20	-6.4	0.1	1.5		1.9	3	3		97.7	-8	36
LVC312	1	C	2022-12-20	-6.4	0.2	1.6		1.9	2.7	3		96.9	-7	40
LVC313	1	A	2021-02-02	-2.6	0.6	0.6		1.3	2.3	2.8		16.2	-46	13
LVC313	1	B	2021-02-02	-2.6	-0.5	0.3		1.1	2	2.6		19	-58	10
LVC313	1	C	2021-02-02	-2.6	-0.7	0.6		1.8	2.8	3.3		24.4	-132	15
LVC313	1	A	2021-02-22	4.2	1	-0.3		-0.2	0.7	1.8		12.7	-44	18
LVC313	1	B	2021-02-22	4.2	0.6	-0.3		0.1	1	1.6		15	-52	22
LVC313	1	C	2021-02-22	4.2	0.6	-0.1		0.1	1.8	2.4		23.4	-116	20
LVC313	1	A	2021-03-19	-3.1	0.2	-0.1		0.5	1.4	1.7		20.3	-32	7
LVC313	1	B	2021-03-19	-3.1	-0.1	-0.1		0.1	1.1	1.5		12.3	-34	9
LVC313	1	C	2021-03-19	-3.1	0	0.4		0.9	1.9	2.4		7.3	-59	8
LVC313	1	0	2021-04-22	9.3									-84
LVC313	1	A	2021-04-22	9.3		3.9		3.6	2.5	2.7		36.1	-36	0
LVC313	1	B	2021-04-22	9.3		4.4		4.6	3.7	3.7		47	-39	0
LVC313	1	C	2021-04-22	9.3		4.9		4.9	4	4.1		32.4	-55	0
LVC313	1	0	2021-05-21	9.7									-28
LVC313	1	A	2021-05-21	9.7		7.9		7.7	6.7	6.6		45.7	-33	0
LVC313	1	B	2021-05-21	9.7		7.9		7.7	7.2	7		51.6	-37	0
LVC313	1	C	2021-05-21	9.7		7.9		7.7	6.9	6.7		32.9	-53	0
LVC313	1	0	2021-06-19	27.9									-32
LVC313	1	A	2021-06-19	27.9		16.1		12.6	10	9.4		31.3	-42	0
LVC313	1	B	2021-06-19	27.9		14.9		12.5	10.6	10.1		35.9	-44	0
LVC313	1	C	2021-06-19	27.9		12.5		11.6	9.8	9.3		29.6	-62	0
LVC313	1	0	2021-07-22	17.4									-31
LVC313	1	A	2021-07-22	17.4		14.1		14.5	13.9	13.6		16.7	-41	0
LVC313	1	B	2021-07-22	17.4		14.1		14.8	14.5	14.3		35.5	-45	0
LVC313	1	C	2021-07-22	17.4		13.7		14	13.3	12.7		27.1	-66	0
LVC313	1	0	2021-08-24	12.4									-27
LVC313	1	A	2021-08-24	12.4		11.8		12.6	12.5	12.6		36.7	-39	0
LVC313	1	B	2021-08-24	12.4		11.5		12.4	12.3	12.4		40	-42	0
LVC313	1	C	2021-08-24	12.4		11.3		11.8	11.5	11.4		25.2	-66	0
LVC313	1	0	2021-09-27	9.1									-28
LVC313	1	A	2021-09-27	9.1		7.9		9.4	9.5	9.8		36.3	-34	0
LVC313	1	B	2021-09-27	9.1		7.6		9.1	9.1	9.4		49.9	-39	0
LVC313	1	C	2021-09-27	9.1		7.7		8.8	8.8	9.1		41.7	-51	0
LVC313	1	0	2021-10-20	6.2									-32
LVC313	1	A	2021-10-20	6.2		5.3		7	7.2	8		41.1	-44	0
LVC313	1	B	2021-10-20	6.2		5.1		6.3	6.7	7.4		56.3	-49	0
LVC313	1	C	2021-10-20	6.2		5.3		6.5	7.1	7.6		45.8	-70	0
LVC313	1	0	2021-11-23	-2.1									-22
LVC313	1	A	2021-11-23	-2.1		2.1		4.4	5.2	6.3		29.8	-33	2
LVC313	1	B	2021-11-23	-2.1		2.1		4	4.4	5.4		43.2	-38	2
LVC313	1	C	2021-11-23	-2.1		2.7		4.4	5	5.9		32.9	-52	2
LVC313	1	0	2021-12-17
LVC313	1	A	2021-12-17
LVC313	1	B	2021-12-17
LVC313	1	C	2021-12-17
LVC313	1	A	2022-01-27
LVC313	1	B	2022-01-27
LVC313	1	C	2022-01-27
LVC313	1	A	2022-02-22
LVC313	1	B	2022-02-22
LVC313	1	C	2022-02-22
LVC313	1	A	2022-03-23
LVC313	1	B	2022-03-23
LVC313	1	C	2022-03-23
LVC313	1	A	2022-04-26
LVC313	1	B	2022-04-26
LVC313	1	C	2022-04-26
LVC313	1	0	2022-05-27	10.3									-17
LVC313	1	A	2022-05-27	10.3	8.6	9.2		9.6	7.3	6.7		85.8	-31	0
LVC313	1	B	2022-05-27	10.3	9.1	9.4		9.9	8.1	7.5		31	-7	0
LVC313	1	C	2022-05-27	10.3	8.5	8.2		8.6	7.5	7.5		34.9	-20	0
LVC313	1	0	2022-06-28	29									-15
LVC313	1	A	2022-06-28	29	17.6	16.2		14	12.4	11.7		31.5	-38	0
LVC313	1	B	2022-06-28	29	19.3	17.9		16.2	15	13.6		39.4	-11	0
LVC313	1	C	2022-06-28	29	17.3	14.1		13.3	12.6	11.1		28.8	-44	0
LVC313	1	0	2022-07-25	26.6									-14
LVC313	1	A	2022-07-25	26.6	16.6	16		15	14	13.3		29.7	-37	0
LVC313	1	B	2022-07-25	26.6	18.5	17.3		16.5	15.9	15		35	-12	0
LVC313	1	C	2022-07-25	26.6	17.2	15.3		13.9	13.7	13.4		30.5	-49	0
LVC313	1	0	2022-08-25	22.1									-19
LVC313	1	A	2022-08-25	22.1	17.8	17.3		16.2	15.1	14		27.1	-40	0
LVC313	1	B	2022-08-25	22.1	19.1	19.1		18.4	17	15.8		36.9	-19	0
LVC313	1	C	2022-08-25	22.1	17.1	16		15.3	15	14.7		20.4	-66	0
LVC313	1	0	2022-09-21	9.4									-18
LVC313	1	A	2022-09-21	9.4	9.3	10.7		11.2	11.3	10.5		38.2	-37	0
LVC313	1	B	2022-09-21	9.4	9.6	10.6		11.1	11.2	10.3		43.5	-14	0
LVC313	1	C	2022-09-21	9.4	9.6	10.8		11.1	11.2	10.3		26.5	-67	0
LVC313	1	0	2022-10-24	7.4									-12
LVC313	1	A	2022-10-24	7.4	6	6.7		7.3	8	8.4		85.5	-34	0
LVC313	1	B	2022-10-24	7.4	5.9	6.5		6.8	7.3	7.7		93.9	-8	0
LVC313	1	C	2022-10-24	7.4	7.2	8		8.1	8.3	8.5		37.2	-42	0
LVC313	1	0	2022-11-23	-4.1									-13
LVC313	1	A	2022-11-23	-4.1	0.8	3.1		4.2	5.4	6.1		95.2	-35	20
LVC313	1	B	2022-11-23	-4.1	1.1	2.8		3.7	4.8	5.3		97.4	-10	16
LVC313	1	C	2022-11-23	-4.1	3.2	5		5.4	5.6	6		86.3	-59	16
LVC313	1	0	2022-12-20	-4.6									-16
LVC313	1	A	2022-12-20	-4.6	1	1.9		2	3.2	3.8		32.2	-27	34
LVC313	1	B	2022-12-20	-4.6	0.1	1.6		1.8	2.7	3.4		90	-13	34
LVC313	1	C	2022-12-20	-4.6	1.7	3		3.3	3.6	3.9		35	-34	33
EEC108	1	A	2021-01-14	-11	-5.2	1.8	2.7		3.4	3.9		25.5	-25	9
EEC108	1	B	2021-01-14	-11	-4.3	1.2	2.3		3.2	3.8		27.9	-24	9
EEC108	1	C	2021-01-14	-11	-3.8	2.1	3.8		3.7	4.2		37.8		9
EEC106	1	A	2021-01-14	-8.5	-0.7	1.4	2.6		3.4	3.9		44	-41	15
EEC106	1	B	2021-01-14	-8.5	-1.7	0.9	1.9		2.8	3.4		39	-41.5	16
EEC106	1	C	2021-01-14	-8.5	-2.3	0.8	1.7		2.6	3.5		34.3	-40	20
EEC105	1	A	2021-01-14	-11	-1.6	0.6	2.2		3.4	3.8		15.4	-80	8
EEC105	1	B	2021-01-14	-11	-3.3	0	1.7		2.8	3.4		25.5	-69	12
EEC105	1	C	2021-01-14	-11	-3.5	0.4	1.6		2.4	3.1		18	-68.5	13
EEC104	1	A	2021-01-14	-9	-2.5	1	2.9		3.7	4.5		18.9	-52	9
EEC104	1	B	2021-01-14	-9	-3.5	1.1	2.1		3	3.9		13.2	-50	7
EEC104	1	C	2021-01-14	-9	-3.5	1.5	2.8		3.6	4.5		27.4	-47	7
EEC109	1	A	2021-01-13	-2	0.5	1.5	2.7		3.7	4.5		41.2	-72	12
EEC109	1	B	2021-01-13	-2	0	1.7	3.1		4.1	4.6		38	-55	11
EEC109	1	C	2021-01-13	-2	0.7	1.4	2		2.8	3.4		61.4	-20.5	10
EEC108	1	A	2021-01-26	2	0.5	1.2	2.1		2.8	3.3		33.9	-22	5
EEC108	1	B	2021-01-26	2	1.2	1.6	2.3		2.8	3.1		46.5	-24	6
EEC108	1	C	2021-01-26	2	2.5	1.1	2.4		3.1	3.5		43.4		6
EEC106	1	A	2021-01-26	2.5	0.9	0.8	1.5		2.5	3.2		25.4	-43	13
EEC106	1	B	2021-01-26	2.5	0.8	0.2	1.2		2.3	3		29.6	-44	16
EEC106	1	C	2021-01-26	2.5	0.7	0.5	1.3		2.6	3.1		39	-43.5	17
EEC105	1	A	2021-01-26	0.9	0.3	0.4	1.4		2.8	3.1		29.3	-72	4
EEC105	1	B	2021-01-26	0.9	0.5	0	1		2	2.7		24.6	-72	7
EEC105	1	C	2021-01-26	0.9	0.9	1	1.4		2.1	2.8		24.6	-70	8
EEC104	1	A	2021-01-26	2	0.3	1.5	1.9		2.9	3.9		27.4	-54	7
EEC104	1	B	2021-01-26	2	1.6	1.5	1.2		2.2	2.9		26.6	-55	6
EEC104	1	C	2021-01-26	2	0.7	1.5	1.9		2.8	3.6		28.2	-52	8
EEC109	1	A	2021-01-28	1	0.3	0.5	1.6		2.9	3.6		23.1	-75.5
EEC109	1	B	2021-01-28	1	0.5	0.8	1.8		3	3.6		40.6	-48
EEC109	1	C	2021-01-28	1	0.9	0.5	1.1		2	2.4		51.8	-25
EEC108	1	A	2021-02-12	-10	-3.1	0.3	1.4		2.4	2.7		9	-26	13
EEC108	1	B	2021-02-12	-10	-5.5	0.3	1.5		2.4	2.6		13.2	-24	14
EEC108	1	C	2021-02-12	-10	-5.5	0.3	1.5		2.4	3		13.3		13
EEC106	1	A	2021-02-12	-8		-0.3	0.1		1.8	2.2		0	-46	15
EEC106	1	B	2021-02-12	-8	-5	-0.3	0.9		1.7	2.3		0	-45	21
EEC106	1	C	2021-02-12	-8		-0.2	0.6		1.7	2.2		0	-44	20
EEC105	1	A	2021-02-12	-11		-0.9	0.6		1.8	2.7		0	-72	9
EEC105	1	B	2021-02-12	-11		-1.1	0.1		1.3	2		0	-72	9
EEC105	1	C	2021-02-12	-11	-7	-0.6	0.3		1.4	2		0	-70	13
EEC104	1	A	2021-02-12	-10	-7.1	-1	0.4		1.9	2.7		6.5	-55	12
EEC104	1	B	2021-02-12	-10	-6.3	-0.5	0.6		1.7	2		3.5	-45.6	11
EEC104	1	C	2021-02-12	-10	-4.5	-0.4	0.8		2	2.5		7.3	-53	12
EEC109	1	A	2021-02-14	-3	-0.2	0.5	1.4		2.6	3.1		17.4	-75	6
EEC109	1	B	2021-02-14	-3	-0.9	0.8	1.9		2.8	3.1		30.1	-59.5	4
EEC109	1	C	2021-02-14	-3	-0.3	0.2	0.7		1.5	1.9		0	-26	8
EEC108	1	A	2021-02-23	-7	-2	-0.3	0.6		1.7	2.1		6.5	-26	7
EEC108	1	B	2021-02-23	-7	-2.6	-0.2	0.7		1.7	2.1		12.9	-23.5	9
EEC108	1	C	2021-02-23	-7	-3.3	-0.4	0.7		2	2.4		15.2	-30	8
EEC106	1	A	2021-02-24	2	0.9	0	0.9		2	2.3		27.7	-48	15
EEC106	1	B	2021-02-24	2	1	0	0.1		1.1	1.7		18.1	-49	16
EEC106	1	C	2021-02-24	2	1.8	-0.1	0		1	1.6		15.4	-48.7	17
EEC105	1	A	2021-02-23	-6		-0.6	0		1.3	2		0	-74	5
EEC105	1	B	2021-02-23	-6		-1	-0.3		0.8	1.5		0	-75	8
EEC105	1	C	2021-02-23	-6		-1.1	-0.3		0.8	1.4		0	-77	10
EEC104	1	A	2021-02-24	2.5	0.5	0	0.6		1.8	2.5		18.1	-57	6
EEC104	1	B	2021-02-24	2.5	0.9	0	0.1		0.9	1.4		17.1	-58	6
EEC104	1	C	2021-02-24	2.5	0.5	-0.1	0		1	1.7		16.3	-57.5	9
EEC109	1	A	2021-02-28	7.1	6.7	0.2	1		1.9	2.5		29.2	-68
EEC109	1	B	2021-02-28	7.1	4.3	0.2	1.1		2	2.4		43.8	-43
EEC109	1	C	2021-02-28	7.1	2.5	0.7	1.1		1.7	1.9		46.6	-24
EEC108	1	A	2021-03-11	0.5	1.2	0.5	1.3		1.9	2.2		7.3	-16.7	4
EEC108	1	B	2021-03-11	0.5	-0.2	0.8	1.4		1.9	2.1		44	-19	3
EEC108	1	C	2021-03-11	0.5	0	0.5	1.6		2.1	2.4		3.1	-21	4
EEC106	1	A	2021-03-11	-1.2	-0.5	0	0.8		1.8	2.5		6	-34.3	7
EEC106	1	B	2021-03-11	-1.2	-0.8	0	0.7		1.5	2		7.3	-35	6
EEC106	1	C	2021-03-11	-1.2	0.3	-0.1	0.6		1.5	2		7	-32.2	5
EEC105	1	A	2021-03-09	-8	-2.8	-0.1	0.7		1.5	2.1		0	-66.7	3
EEC105	1	B	2021-03-09	-8		-0.1	0.3		1.3	1.7		0	-65.2	8
EEC105	1	C	2021-03-09	-8		-0.1	0.3		1.1	1.6		0	-65.6	8
EEC104	1	A	2021-03-11	1	1.4	0	0.8		1.8	2.3		0	-39	5
EEC104	1	B	2021-03-11	1	-0.9	-0.1	0.2		1	1.4		0	-38.3	4
EEC104	1	C	2021-03-11	1	0.4	0	0.8		1.6	2		0	-36	5
EEC109	1	A	2021-03-14	3.4		0.1	1		2	2.6		0	-69	5
EEC109	1	B	2021-03-14	3.4		0.1	1		1.9	2.3		0	-39	4
EEC109	1	C	2021-03-14	3.4		0.1	1		1.9	2.3		0	-6	5
EEC108	1	A	2021-03-25	7.5	5.7	1.3	1.6		2	2.1		59.7	-5
EEC108	1	B	2021-03-25	7.5	3.6	0.9	1.4		1.9	2		58.1	-6
EEC108	1	C	2021-03-25	7.5	4.3	1	1.7		2.2	2.3		60.2	-7.5
EEC106	1	A	2021-03-25	6.5	3	0.1	0.6		1.9	2.3		24.5	-29.4
EEC106	1	B	2021-03-25	6.5	2.5	0.1	0.8		1.6	1.9		23.9	-31.5
EEC106	1	C	2021-03-25	6.5	2.5	0.1	0.7		1.6	2		17.8	-34.4
EEC105	1	A	2021-03-25	7	3.5	0.1	0.6		1.6	2		20.8	-64
EEC105	1	B	2021-03-25	7	3	0.2	0.5		1.3	1.6		23.5	-65
EEC105	1	C	2021-03-25	7	2.7	0.2	0.5		1.3	1.8		27	-60.2
EEC104	1	A	2021-03-25	5	2.6	0.5	1.6		2.3	2.7		27.6	-37.2
EEC104	1	B	2021-03-25	5	2.5	0.1	0.6		1.2	1.5		25	-34.5
EEC104	1	C	2021-03-25	5	3.2	0.2	0.9		1.6	2		21	-28.5
EEC109	1	A	2021-03-24	3.1	1.2	0.9	1.8		2.3	2.6		43.8	-69
EEC109	1	B	2021-03-24	3.1	1	0.3	1.1		1.9	2.3		42.8	-40.5
EEC109	1	C	2021-03-24	3.1	1.1	0.3	0.7		1.3	1.7		50.3	-2
EEC108	1	A	2021-04-15	12.7	8.7	6.1	5		4.7	4.6		61.1	-10.5
EEC108	1	B	2021-04-15	12.7	8.4	6.2	5.1		4.8	4.7		53.6	-7
EEC108	1	C	2021-04-15	12.7	9	6.2	5		4.7	4.6		59.3	-14
EEC106	1	A	2021-04-15	11.8	12.6	5.1	5		4.5	4.2		55.7	-32
EEC106	1	B	2021-04-15	11.8	11.7	4.8	4.6		4.3	4		38.6	-35.3
EEC106	1	C	2021-04-15	11.8	13	4.6	4.5		4.1	3.9		42.5	-33
EEC105	1	A	2021-04-15	10.1	8	3	2.9		2.8	3		54.5	-63
EEC105	1	B	2021-04-15	10.1	6.3	0.3	0.9		1.5	1.9		38.4	-64
EEC105	1	C	2021-04-15	10.1	4	1.9	1.6		1.9	2.1		50.8	-70
EEC104	1	A	2021-04-15	11.2	8.6	5.6	4.7		4.4	4.4		31.1	-42.5
EEC104	1	B	2021-04-15	11.2	7.5	3.7	3.2		3	3.2		46.5	-37
EEC104	1	C	2021-04-15	11.2	8.4	3.7	3.2		3	3.2		45.5	-27
EEC109	1	A	2021-04-13	7.5	7.9	6.5	5.5		4.8	4.5		49.5	-71
EEC109	1	B	2021-04-13	7.5	7.5	5	4.4		4.1	3.8		48	-40.5
EEC109	1	C	2021-04-13	7.5	7	5	4.2		3.5	3.4		69.5	-7
EEC108	1	A	2021-04-30	11.2	1.6	6.7	5.8		5.6	5.6		62.2	-20
EEC108	1	B	2021-04-30	11.2	12	6.1	5.4		5.4	5.3		52.7	-23
EEC108	1	C	2021-04-30	11.2	11.3	6.4	5.6		5.4	5.3		31.8	-24
EEC106	1	A	2021-04-30	11.5	12.1	6.6	6		5.7	5.5		46.6	-35.5
EEC106	1	B	2021-04-30	11.5	11.2	6.3	5.7		5.4	5.2		32.5	-41.5
EEC106	1	C	2021-04-30	11.5	11.7	6.1	5.6		5.3	5.1		35.1	-46
EEC105	1	A	2021-04-30	6.2	8.1	5.7	5.4		5	5		47.3	-70
EEC105	1	B	2021-04-30	6.2	9	5.2	4.6		4.4	4.2		28.2	-70.5
EEC105	1	C	2021-04-30	6.2	8.1	5.5	5		4.7	4.6		48.8	-73
EEC104	1	A	2021-04-30	10.8	11	6	5.5		5.4	5.3		33.3	-55.5
EEC104	1	B	2021-04-30	10.8	11.6	4.9	4.4		4.3	4.2		25.8	-50.5
EEC104	1	C	2021-04-30	10.8	10.4	5.4	4.5		4.4	4.3		43.2	-42
EEC109	1	A	2021-04-29	6.2	9	5.7	6.1		6.3	6.1		35.9	-65
EEC109	1	B	2021-04-29	6.3	9.8	5.4	5.5		5.6	5.5		53.7	-45
EEC109	1	C	2021-04-29	6.5	7.2	5	5.3		5.3	5.2		69	-11
EEC108	1	A	2021-05-10	23.4	21.8	11.5	7.8		6.9	6.4		59.5	-16
EEC108	1	B	2021-05-10	23	18.2	9	7.6		6.5	6.2		51	-23.4
EEC108	1	C	2021-05-10	22.9	21.4	10.3	7.9		6.4	6.1		55.8	-25
EEC106	1	A	2021-05-16	21.1	18.5	15.1	11.1		9.5	8.7		36.1	-41.5
EEC106	1	B	2021-05-16	19.8	16.6	13.4	10.9		8.8	8.6		51.5	-38.5
EEC106	1	C	2021-05-16	16.8	15.7	12.9	10		8.7	7.9		36.4	-39.5
EEC105	1	A	2021-05-17	21.1	17.1	13.7	11.5		9.2	8.2		42.8	-69.1
EEC105	1	B	2021-05-17	19.2	16.4	12.9	10		8.2	7.8		43.7	-68.8
EEC105	1	C	2021-05-17	18.6	17.4	12.8	10.4		8.8	8		43.6	-68.5
EEC104	1	A	2021-05-16	24	18	10.8	9.3		7.9	7.4		26.9	-56
EEC104	1	B	2021-05-16	20.8	18	11.1	9		7.6	7.1		41.3	-54.5
EEC104	1	C	2021-05-16	22.8	16.1	10.8	8.9		7.4	7		46.6	-47
EEC109	1	A	2021-05-17	15	15.4	15.5	13.1		11.7	10.7		46	-72
EEC109	1	B	2021-05-17	15.2	15.2	13.9	11.7		9.9	9		37.9	-30.5
EEC109	1	C	2021-05-17	14.5	15.3	13.4	11.8		9.7	9		42	0.5
EEC108	1	A	2021-05-31	11.6	12.6	11.2	10.1		9.2	9.5		54.3	-18
EEC108	1	B	2021-05-31	11.9	11.6	11.9	10.6		9.4	9.9		56.5	-18
EEC108	1	C	2021-05-31	11	11.3	11	10.1		8.9	9.2		58	-21
EEC106	1	A	2021-05-30	17	14.5	12.4	10.4		9.5	9.1		46.5	-30
EEC106	1	B	2021-05-30	15.4	14.7	11.9	10.3		9.6	9.4		46.9	-30.5
EEC106	1	C	2021-05-30	15	14	11.3	9.9		9.2	8.8		43.2	-33
EEC105	1	A	2021-05-30	17.4	15	12	9.9		9.2	8.9		43.4	-65
EEC105	1	B	2021-05-30	17	14.6	11.8	9.9		9.4	9		58	-78.5
EEC105	1	C	2021-05-30	16.2	14.7	11.2	9.8		9.3	8.9		49.1	-62.5
EEC104	1	A	2021-05-31	14.5	13.3	11.2	10.1		9.2	8.9		44.2	-35.5
EEC104	1	B	2021-05-31	13.5	13.1	11.9	9.7		8.9	10.5		34.8	-38
EEC104	1	C	2021-05-31	12.1	11.8	10.4	8.8		8.1	9.1		50.1	-47
EEC109	1	A	2021-05-28	16.4	15.1	15.2	12.1		10.7	10.4		49.5	-71
EEC109	1	B	2021-05-28	14.8	15.5	13.6	11.5		10.3	9.9		54.7	-22
EEC109	1	C	2021-05-28	14.4	14.3	12.7	11.1		9.9	9.6		21.5	0.5
EEC108	1	A	2021-06-15	21.3	18.4	13.6	12.8		12.5	11.6		28.1	-23
EEC108	1	B	2021-06-15	21.3	17.7	13.3	12.4		11.9	11.1		23.9	-24
EEC108	1	C	2021-06-15	21.3	16.9	13	12.2		11.5	10.8		52	-28
EEC106	1	A	2021-06-15	24.2	23.8	13.6	13.2		12.2	10.9		16.1	-101
EEC106	1	B	2021-06-15	24.2	21.1	14.5	13.1		12.2	10.7		20	-106
EEC106	1	C	2021-06-15	24.2	20.8	13.9	12.9		11.9	10.4		25.1	-113
EEC105	1	A	2021-06-15	21.4	20	13	12.3		11.2	9.9		22.7	-90
EEC105	1	B	2021-06-15	21.4	18.8	14.3	12.9		11.9	10.5		25.5	-78
EEC105	1	C	2021-06-15	21.4	18	14.5	13		12	10.6		40.9	-93
EEC104	1	A	2021-06-15	25.1	19.9	12.9	12.3		11	10.4		28.2	-65
EEC104	1	B	2021-06-15	25.1	21.1	13.6	12.5		11.5	10.6		35.5	-62.5
EEC104	1	C	2021-06-15	25.1	19	12.4	12		11.1	10		30.2	-57
EEC109	1	A	2021-06-18	29	29.7	20.2	16.6		14.2	12.7		25.4
EEC109	1	B	2021-06-18	29	28.5	18.4	15.6		14.4	12.8		17	-74
EEC109	1	C	2021-06-18	29	26.1	18.8	15.8		13.6	13.1		69	-31
EEC108	1	A	2021-07-02	25.6	23.2	17	15.7		15	14.3		26.4	-27
EEC108	1	B	2021-07-02	23.8	22.2	17	15.4		15	14.4		29	-25
EEC108	1	C	2021-07-02	23	21.3	16.8	15.1		13.3	12.8		20.8	-27
EEC106	1	A	2021-06-29	21.3	25.3	17.8	16.8		15.7	14		11.6	-66
EEC106	1	B	2021-06-29	21.3	23.6	18	17		15.7	14.1		13	-86
EEC106	1	C	2021-06-29	21.3	21.5	17.1	15.9		14.7	13.2		20.8	-93
EEC105	1	A	2021-06-29	20.8	21.6	16.6	15.6		14.2	13		10.1	-87
EEC105	1	B	2021-06-29	20.8	20.8	17.3	16.4		15.9	13.8		23.4	-82
EEC105	1	C	2021-06-29	20.8	21.1	17.6	16.3		15.2	13.7		40	-91
EEC104	1	A	2021-06-29	23.3	26	17.5	15.4		14.1	13		22.5	-55
EEC104	1	B	2021-06-29	23.3	23.3	16.9	16		14.5	12.9		32.8	-65
EEC104	1	C	2021-06-29	23.3	22.1	16	14.5		13	12.5		20.5	-62
EEC109	1	A	2021-06-30	23.6	22.5	18.4	18		17.3	16		13.8	-71
EEC109	1	B	2021-06-30	23.6	24.3	17.7	17.3		16.1	15		14.8	-66
EEC109	1	C	2021-06-30	23.6	23	17.6	17.1		16.4	15		43.8	-42
EEC108	1	A	2021-07-15	30.5	30.9	18.7	17.6		16.4	15.6		21.5	-27
EEC108	1	B	2021-07-15	30.5	28.1	19.1	16.9		16.2	14.6		21.5	-23.5
EEC108	1	C	2021-07-15	28.6	26.3	18.9	16.2		15.2	14.3		25	-26
EEC106	1	A	2021-07-16	30.3	29.3	22	18.6		16.8	15.2		8.4	-82
EEC106	1	B	2021-07-16	28.2	28.6	21.8	18.6		16.7	15		6.6	-97
EEC106	1	C	2021-07-16	28	23.1	21.5	18.5		16.5	14.7		10.1	-119
EEC105	1	A	2021-07-16	30.2	29.3	22.6	19.7		17.6	15.6		10.4	-90
EEC105	1	B	2021-07-16	30.2	31.4	22.5	19.5		17.4	15.6		17.9	-91
EEC105	1	C	2021-07-16	30.2	30.5	22.1	19.1		16.8	15.3		9.9	-97
EEC104	1	A	2021-07-16	28.2	29.2	22.6	19.1		16.3	14.4		5.1	-93
EEC104	1	B	2021-07-16	27.3	27.5	21.9	18.4		16.3	15.4		12.5	-90
EEC104	1	C	2021-07-16	27	26.4	21.2	17.8		16.2	14.5		6.2	-94
EEC109	1	A	2021-07-17	28.8	24.1	22.5	20.3		18.2	16.5		9.5	-71.5
EEC109	1	B	2021-07-17	24.9	23.8	22.3	20.1		18.6	17.2		10.8	-74
EEC109	1	C	2021-07-17	23.9	22.8	22.1	20.1		19.2	16.6		47.5	-68
EEC108	1	A	2021-07-28	30.4	24.5	18.5	16.1		15.1	14.6		24.7	-26
EEC108	1	B	2021-07-28	25.5	23.3	18	15.8		15	14.5		21.1	-24.5
EEC108	1	C	2021-07-28	25.2	23.9	17.9	15.6		14.5	14		19.9	-26
EEC106	1	A	2021-07-27	28.7	32.2	20.1	17.1		15.1	14.1		15	-81
EEC106	1	B	2021-07-27	27.4	27.6	19.7	16.8		15.3	14		8.6	-95.5
EEC106	1	C	2021-07-27	26.7	26.7	20.1	16.3		15	14.1		15.3	-115.3
EEC105	1	A	2021-07-27	30.2	31.6	21.1	16.8		15.3	14		8.7	-88
EEC105	1	B	2021-07-27	30.9	31.1	19.4	17.2		15.9	14.9		15.2	-89
EEC105	1	C	2021-07-27	31.4	30.4	19.2	16		14.8	13.9		17.2	-95.5
EEC104	1	A	2021-07-27	29.5	27.8	18.6	16.1		15.7	13.3		13.5	-92.5
EEC104	1	B	2021-07-27	31.5	30.5	18.6	16		14.6	13.6		8.1	-87.5
EEC104	1	C	2021-07-27	32.1	32.2	17.2	14.8		14	13		10.1	-95.5
EEC109	1	A	2021-07-28	26	24.6	20.7	19.2		17.6	16.2		14.1	-71.3
EEC109	1	B	2021-07-28	28.1	24	19.6	17.6		16.4	15.2		16	-73.2
EEC109	1	C	2021-07-28	28	23.9	19.5	17.9		16.8	15.7		42.3	-79.3
EEC108	1	A	2021-08-13	22.6	20.1	17.2	15		14.5	14.2		45.1	-25
EEC108	1	B	2021-08-13	20.8	19.3	16.1	14.7		14.3	14		31.3	-24
EEC108	1	C	2021-08-13	20.4	19.2	16.6	14.5		14	13.6		44.5	-25
EEC106	1	A	2021-08-14	20	19.6	18.4	16.3		15.6	15.4		25.9	-84
EEC106	1	B	2021-08-14	19	19.3	17.8	15.9		15.1	14		22.9	-96
EEC106	1	C	2021-08-14	18	19.3	17.6	15.8		15	13.9		20.4	-113
EEC105	1	A	2021-08-14	18	18.3	17.5	15.9		14.9	14		16.5	-84
EEC105	1	B	2021-08-14	16.9	18.7	17.4	15.8		15.2	14.2		54.6	-84
EEC105	1	C	2021-08-14	16	17.5	17.4	15.7		14.8	14		40.7	-96
EEC104	1	A	2021-08-14	24.2	22.4	19	15.7		15.1	13.6		24.6	-75
EEC104	1	B	2021-08-14	21.6	20.1	17.7	15.9		15.2	13.9		29.3	-80
EEC104	1	C	2021-08-14	20.3	19.9	16.5	14.9		14.2	13.3		41.9	-93
EEC109	1	A	2021-08-12	19.7	20.3	18.7	17.2		17	16.3		24.2	-71
EEC109	1	B	2021-08-12	19.3	19.8	18.7	16.9		16.3	15.7		23.2	-69
EEC109	1	C	2021-08-12	19	19.8	17.3	16.4		16.1	15.3		61.4	-75
EEC108	1	A	2021-08-28	24.4	20.5	15.7	13.5		13.2	12.9		48	-27
EEC108	1	B	2021-08-28	21	19.1	15.6	13.6		13.2	12.9		37.4	-27
EEC108	1	C	2021-08-28	21.1	19.1	15.3	13.3		13	12.7		50.9	-29
EEC106	1	A	2021-08-28	20.3	19	17.7	14.3		13.8	13.4		39.6	-114
EEC106	1	B	2021-08-28	19.6	18.9	16.7	14.2		13.9	13.6		22	-116
EEC106	1	C	2021-08-28	19.1	18.6	16.2	13.8		13.4	12.8		24.5	-122
EEC105	1	A	2021-08-28	22.7	20.3	17.2	14.4		13.7	13.2		46.1	-91
EEC105	1	B	2021-08-28	20.3	19.4	16.4	14.2		13.8	13.5		55.3	-91.5
EEC105	1	C	2021-08-28	20.4	18.9	16.8	14.1		13.8	13.2		43.7	-100
EEC104	1	A	2021-08-28	18.9	18.4	17.5	14		13.4	12.7		38.5	-99.5
EEC104	1	B	2021-08-28	18.6	18.3	15.8	14.1		13.6	12.9		29.4	-93
EEC104	1	C	2021-08-28	17.9	17.6	16.5	14.1		13.8	13.1		23.3	-104
EEC109	1	A	2021-08-27	14.5	14.8	14.7	15.2		15.3	15.3		50.4	-72
EEC109	1	B	2021-08-27	14.2	14.8	15	15.3		15.4	15.2		38.6	-78
EEC109	1	C	2021-08-27	14	14.5	14.4	14.5		14.6	14.5		43.9	-55
EEC108	1	A	2021-09-20	10.3	9.1	9.1	10.4		10.7	11		48.2	-32.5
EEC108	1	B	2021-09-20	9.8	9.8	9.2	10.5		10.9	11.2		31.1	-29
EEC108	1	C	2021-09-20	9.8	9.7	9.1	10.4		10.8	11		48	-29
EEC106	1	A	2021-09-19	19.2	13.5	10.4	11.2		11.8	11.9		38.2	-116
EEC106	1	B	2021-09-19	13.6	10.9	10.1	10.8		11.3	11.6		30.4	-118
EEC106	1	C	2021-09-19	10.6	10.4	9.5	10.9		11.4	11.5		25.7	-123.5
EEC105	1	A	2021-09-14	13.3	14.5	13.4	13.6		13.8	13.3		24.2	-91
EEC105	1	B	2021-09-14	13.4	13.4	12.8	13.5		13.4	12.9		23.1	-91
EEC105	1	C	2021-09-14	13.4	13.4	12.7	13.4		13.3	12.7		48.8	-103.5
EEC104	1	A	2021-09-19	9.4	9.7	10.8	10.8		11.2	11.5		25.2	-98
EEC104	1	B	2021-09-19	9.3	8.9	9.8	10.6		11.4	11.5		31	-94
EEC104	1	C	2021-09-19	8.9	8.5	9.5	10.9		11.7	11.8		10.6	-105.5
EEC109	1	A	2021-09-19	12.2	9.8	12.2	12.9		13.3	13.1		18	-74
EEC109	1	B	2021-09-19	12	10.7	9.4	12.1		13.1	13.8		17.6	-78
EEC109	1	C	2021-09-19	11.8	10.6	9.6	11.3		12.1	12.7		61.8	-51
EEC108	1	A	2021-09-29	9.9	10	9.6	10		10.1	10.2		52.7	-29
EEC108	1	B	2021-09-29	9.7	9.6	9.7	10		10.2	10.2		46.4	-27
EEC108	1	C	2021-09-29	9.6	9.8	9.7	9.9		10.1	10.1		27.8	-28
EEC106	1	A	2021-09-28	10.6	12.3	9.9	10		10.3	10.7		20.7	-113
EEC106	1	B	2021-09-28	10.6	12.4	9.4	9.6		10.1	10.4		28.9	-115
EEC106	1	C	2021-09-28	10.6	12.5	9.3	9.4		9.9	10.1		22.2	-118
EEC105	1	A	2021-09-28	10.2	11	9.1	9.9		10.3	10.7		22.7	-88
EEC105	1	B	2021-09-28	10.2	10.3	8.7	9.4		10.1	10.4		28.1	-91
EEC105	1	C	2021-09-28	10.2	10.7	8.7	9.2		9.8	10.3		47.8	-101.5
EEC104	1	A	2021-09-29	11.9	11.5	10	10.1		10.2	10.3		37.6	-97
EEC104	1	B	2021-09-29	11.8	11.6	9.8	9.8		10	10.2		34.3	-93
EEC104	1	C	2021-09-29	11.8	11	9.7	9.9		9.8	10.1		46.4	-102.5
EEC109	1	A	2021-09-30	10.9	11.2	10	11.3		11.9	12.3		25.4	-75
EEC109	1	B	2021-09-30	11	11	10.6	11.3		11.9	12.4		23.8	-77
EEC109	1	C	2021-09-30	11.5	10.6	9.7	10.4		10.7	11.1		51	-50
EEC108	1	A	2021-10-11	11.2	16.1	9.4	9.3		9.5	9.7		28.8	-24
EEC108	1	B	2021-10-11	10.9	10.5	9.3	9.2		9.4	9.6		25.4	-22
EEC108	1	C	2021-10-11	10.7	9.5	9.3	9.1		9.4	9.4		26.2	-25
EEC106	1	A	2021-10-12	9.2	9.1	8	9		9.4	9.8		23.6	-111
EEC106	1	B	2021-10-12	9.6	9.7	8.1	8.7		9.2	9.6		24.8	-115
EEC106	1	C	2021-10-12	9.8	10.3	8.2	8.7		9.1	9.5		21.8	-120
EEC105	1	A	2021-10-12	10	12.7	10.5	9.2		9.7	10		11.1	-91
EEC105	1	B	2021-10-12	10.6	11.2	8.7	8.7		9.3	9.8		22	-94
EEC105	1	C	2021-10-12	10.5	11.5	8.8	8.8		9.2	9.6		29.3	-100
EEC104	1	A	2021-10-12	6.3	9.5	7.4	9.1		9.4	9.7		26	-99
EEC104	1	B	2021-10-12	6.8	7.5	7.1	8.7		9.1	9.4		25.5	-97
EEC104	1	C	2021-10-12	7.1	7.8	8.3	9.1		9.5	9.6		23.3	-106
EEC109	1	A	2021-10-15	9.9	10.4	8.7	9.7		10.6	11.6		29	-74
EEC109	1	B	2021-10-15	9.9	10.5	9.5	10.6		11.3	11.9		27.7	-77.5
EEC109	1	C	2021-10-15	10	10.5	8.8	9.2		9.7	10.3		55.1	-62
EEC108	1	A	2021-10-25	7.3	6.9	6.5	7.5		7.7	8.2		33.6	-28
EEC108	1	B	2021-10-25	7.5	7	6.7	7.6		8	8.4		34.1	-25
EEC108	1	C	2021-10-25	7.7	7.1	6.7	7.8		8.1	8.6		43.5	-27
EEC106	1	A	2021-10-26	9	7.6	6.4	7.2		7.7	8.4		37.5	-101
EEC106	1	B	2021-10-26	8.8	7	6.1	6.7		7.2	8		26.1	-90
EEC106	1	C	2021-10-26	8.7	6.8	6.4	6.8		7.2	8		38.3	-118
EEC105	1	A	2021-10-26	8.3	7	6.2	7.3		7.7	8.5		24.9	-90
EEC105	1	B	2021-10-26	8.5	7.2	6.4	7		7.7	8.4		22.9	-93
EEC105	1	C	2021-10-26	8.8	7.2	6	6.7		7.3	8.1		48.8	-103
EEC104	1	A	2021-10-26	7.6	6.1	6.4	7.5		8.1	8.5		25.5	-92
EEC104	1	B	2021-10-26	7.8	6.2	6	7.2		7.7	8.2		37.2	-93
EEC104	1	C	2021-10-26	7.5	6.9	8	7.6		8	8.5		33.3	-103
EEC109	1	A	2021-10-29	12.9	10.7	10.1	9.6		9.8	10.4		50.1	-74
EEC109	1	B	2021-10-29	12.5	10.4	10.2	9.7		9.7	10.1		46.1	-78.5
EEC109	1	C	2021-10-29	12.1	10.6	9.4	8.6		8.6	8.8		57.5	-39.5
EEC108	1	A	2021-11-11	7	10.2	6.2	6.5		6.7	7.1		53.8	-25
EEC108	1	B	2021-11-11	7.3	8	6.4	6.6		6.8	7.2		37.9	-27
EEC108	1	C	2021-11-11	7.5	7.9	6.3	6.9		7.2	7.5		45.1	-30
EEC106	1	A	2021-11-10	5.4	3.5	3.4	5.6		6.4	7.6		33.7	-51
EEC106	1	B	2021-11-10	5.3	4.3	2.9	5.2		6.1	7.3		49.9	-52.5
EEC106	1	C	2021-11-10	5.3	4.4	3.7	5.5		6.2	7.2		45.8	-55
EEC105	1	A	2021-11-10	4.2	4.4	2.7	5.1		6.2	7.8		42.2	-92
EEC105	1	B	2021-11-10	4.3	4	3.1	5.5		6	7.4		49.4	-93
EEC105	1	C	2021-11-10	4.3	3.3	2.9	5		5.9	7.1		50.4	-101
EEC104	1	A	2021-11-10	6.6	4.6	3.4	5.8		6.3	7.7		44.1	-64
EEC104	1	B	2021-11-10	6.8	4.8	4.5	5.9		6.7	7.9		35.3	-71.5
EEC104	1	C	2021-11-10	6.9	5.3	4.5	6.3		7	7.8		42.8	-71
EEC109	1	A	2021-11-11	4.4	4.9	5.3	6.5		7.3	9.1		46.4	-74
EEC109	1	B	2021-11-11	4.8	4.3	6	7.6		8.1	9.4		36.5	-55
EEC109	1	C	2021-11-11	5.3	4.9	5.3	6.2		6.8	7.9		58.7	-34
EEC108	1	A	2021-11-22	0.8	-0.2	1.7	4.4		5.3	6.1		40	-28
EEC108	1	B	2021-11-22	0.6	-0.5	2.2	4.8		5.3	6		44.6	-27
EEC108	1	C	2021-11-22	0.3	-0.7	2.6	5.6		6.1	6.7		29.3	-27
EEC106	1	A	2021-11-23	0.7	0.3	0.9	3.5		4.7	6		33.6	-53
EEC106	1	B	2021-11-23	0.9	0.3	0.6	3.7		4.4	5.8		26.6	-54
EEC106	1	C	2021-11-23	1	0.3	1.6	4.2		4.8	6.2		25.3	-52
EEC105	1	A	2021-11-23	1.3	0.7	1.8	4.2		5.4	6.6		20.9	-94
EEC105	1	B	2021-11-23	1.3	0.6	1.3	3.9		4.9	6.2		29.2	-93
EEC105	1	C	2021-11-23	1.4	0.2	1.3	4.3		4.9	6.2		36	-104
EEC104	1	A	2021-11-23	-0.2	0.1	1.3	4.8		5.6	6.6		19.1	-64
EEC104	1	B	2021-11-23	0	0	1.6	4.2		5.1	6.3		27	-62
EEC104	1	C	2021-11-23	0.2	0.2	2.4	5		5.8	6.7		33.4	-63.5
EEC109	1	A	2021-11-25	6	5.5	3.2	4.1		5.3	7.2		46.2	-73
EEC109	1	B	2021-11-25	5.8	6	4.5	5.4		6.2	7.6		44.9	-62.5
EEC109	1	C	2021-11-25	5.8	6.4	4.1	4.3		5	6.2		51.9	-28.6
EEC108	1	A	2021-12-17	3.5	0.6	1.7	3.1		3.6	4.1		56	-28	1
EEC108	1	B	2021-12-17	3.5	0.8	2	3.6		4	4.6		46.5	-25	1
EEC108	1	C	2021-12-17	3.5	0.7	1.9	3.6		4.2	4.6		51.6	-30	2
EEC106	1	A	2021-12-16	4.4	0.6	1.3	2.6		3.3	4.5		44.4	-54	4
EEC106	1	B	2021-12-16	4.4	1.6	1.1	2.5		3.2	4.3		49.3	-54	5
EEC106	1	C	2021-12-16	4.4	1.6	1.3	2.9		3.6	4.7		31	-52	4
EEC105	1	A	2021-12-16	4.2	0.6	0.7	2.4		3.1	4.3		54.8	-95	2
EEC105	1	B	2021-12-16	4.2	0.9	0.5	2		2.9	4.2		39.2	-95	3
EEC105	1	C	2021-12-16	4.2	0.8	0.6	2.2		3	4.1		36.8	-101	5
EEC104	1	A	2021-12-16	4.3	0.9	1.6	2.9		3.6	4.9		49.2	-53	4
EEC104	1	B	2021-12-16	4.3	0.5	1	2.3		2.7	4.1		51.6	-59	3
EEC104	1	C	2021-12-16	4.3	0.6	1.2	2.8		3.5	4.7		49	-39	5
EEC109	1	A	2021-12-15	2.6	0.6	0.7	2.8		4	5.5		46	-73	4
EEC109	1	B	2021-12-15	2.7	1.6	1.5	3.5		4.4	5.7		43.6	-56	6
EEC109	1	C	2021-12-15	2.7	0.8	1.3	2.4		3.1	4.1		63.8	-21	5
EEC108	1	A	2021-12-27	-5	-1.8	0.3	2.3		2.8	3.5		26.2	-27	11
EEC108	1	B	2021-12-27	-5	-2	0.2	2.3		2.8	3.5		34.4	-26	11
EEC108	1	C	2021-12-27	-5	-2.7	0.1	2.2		2.9	3.6		19.5	-28	11
EEC106	1	A	2021-12-27	-8	-3.4	-0.3	1.2		2.5	4		40.8	-48	14
EEC106	1	B	2021-12-27	-8	-3.7	-0.5	1.6		1.9	3.6		20.6	-48	14
EEC106	1	C	2021-12-27	-8	-3.4	-0.2	1.8		2.8	3.8		32.5	-45	14
EEC105	1	A	2021-12-27	-7	-3.2	-0.3	2		2.8	4		39.2	-72	5
EEC105	1	B	2021-12-27	-7	-3.2	-0.3	2		2.6	3.7		32.3	-72	5
EEC105	1	C	2021-12-27	-7	-3.9	-0.6	2		2.3	3.3		19.2	-73	5
EEC104	1	A	2021-12-27	-8	-0.3	-0.3	1.9		2.8	4.1		18.1	-52	10
EEC104	1	B	2021-12-27	-8	-2.4	-0.5	1.2		2	3.4		6.5	-48	6
EEC104	1	C	2021-12-27	-8	-2.7	-0.2	1.7		2.3	3.4		11.2	-47	9
EEC109	1	A	2021-12-29	-7		-0.1	1.8		2.9	3.5		0	-70	10
EEC109	1	B	2021-12-29	-7		-0.1	2.1		3	3.5		0	-55	10
EEC109	1	C	2021-12-29	-7		-0.1	1.4		2	3.5		0	-18.5	7
EEC108	1	A	2022-01-14	2.7	0.9	1.5	2.2		2.6	3.1		56.9	-27	3
EEC108	1	B	2022-01-14	2.7	0.9	1.4	2.2		2.8	3.2		41.8	-26	3
EEC108	1	C	2022-01-14	2.7	0.8	1.7	2.4		3.1	3.5		45.5	-28	3
EEC106	1	A	2022-01-12	-9.5	-5.7	0.6	1.5		2.6	3.5		0	-53	21
EEC106	1	B	2022-01-12	-9.5		-0.2	0.8		1.7	3		0	-53	17
EEC106	1	C	2022-01-12	-9.5	-6	0.2	0.8		1.6	2.8		0	-51	19
EEC105	1	A	2022-01-12	-10	-5.5	-0.5	0.5		1.7	3		0	-75	9
EEC105	1	B	2022-01-12	-10		-0.1	0.6		1.4	2.9		0	-76	9
EEC105	1	C	2022-01-12	-10		-0.1	0.9		1.5	3.1		0	-77	10
EEC104	1	A	2022-01-12	-8		0.9	1.8		2.8	3.8		0	-59	11
EEC104	1	B	2022-01-12	-8		-0.1	0.9		1.9	2.9		0	-57	11
EEC104	1	C	2022-01-12	-8		0.4	1.1		1.8	2.8		0	-55	8
EEC109	1	A	2022-01-14	3.2		0.5	1.6		3	4.2		0	-73	4
EEC109	1	B	2022-01-14	3.2		-0.1	1.5		3	4.1		0	-56	3
EEC109	1	C	2022-01-14	3.2		0.3	1.1		1.8	2.6		0	-20	3
EEC108	1	A	2022-01-24	1	0.6	1	1.7		2.3	2.8		31.7	-30	12
EEC108	1	B	2022-01-24	1	0.9	1.5	2.1		2.7	3		24.5	-28	10
EEC108	1	C	2022-01-24	1	0.5	1.6	2.3		2.9	3.2		30.6	-29	11
EEC106	1	A	2022-01-24	0		0.8	1.5		2.4	3.4		0	-51	19
EEC106	1	B	2022-01-24	0		0.3	1		2.2	3.2		0	-52	21
EEC106	1	C	2022-01-24	0		0.9	1.7		2.4	3.4		0	-50	19
EEC105	1	A	2022-01-24	-1		-0.1	0.6		1.7	2.9		0	-79	6
EEC105	1	B	2022-01-24	-1		-0.1	0.6		1.5	2.5		0	-79	5
EEC105	1	C	2022-01-24	-1		0	1		1.8	2.7		0	-75	12
EEC104	1	A	2022-01-24	0.5		0.2	1.2		2.1	3		0	-57	7
EEC104	1	B	2022-01-24	0.5		0.6	1.4		2.1	2.6		0	-55	6
EEC104	1	C	2022-01-24	0.5		0.1	0.8		1.7	2.4		0	-53	14
EEC109	1	A	2022-01-26	-5.3		0.1	1.3		2.4	3.6		0	-73	5
EEC109	1	B	2022-01-26	-5.3		-0.2	0.9		1.8	3.3		0	-54	6
EEC109	1	C	2022-01-26	-5.3		0.5	1		1.7	2.3		0	-20	4
EEC108	1	A	2022-02-09	1.3	1.2	1.5	2.1		2.5	2.8		55.4	-25	15
EEC108	1	B	2022-02-09	1.3	1	1.6	2.1		2.5	2.8		52.8	-24	16
EEC108	1	C	2022-02-09	1.3	0.9	1.7	2.2		2.8	3.1		49.6	-27	14
EEC106	1	A	2022-02-11	0.8		0.5	1		2.1	2.9		0	-44	22
EEC106	1	B	2022-02-11	0.8		0.1	0.8		1.9	2.8		0	-46	20
EEC106	1	C	2022-02-11	0.8		0.2	0.9		1.8	2.6		0	-43.5	21
EEC105	1	A	2022-02-11	0.8		-0.1	0.6		1.5	2.4		0	-68	12
EEC105	1	B	2022-02-11	0.8		-0.1	0.7		1.4	2.2		0	-69	15
EEC105	1	C	2022-02-11	0.8		-0.1	0.7		1.5	2.3		0	-70	15
EEC104	1	A	2022-02-11	0.8		0	0.7		1.9	2.7		0	-49	9
EEC104	1	B	2022-02-11	0.8		0.9	1.5		2	2.6		0	-46	15
EEC104	1	C	2022-02-11	0.8		0.9	1.6		2.4	3		0	-40	10
EEC109	1	A	2022-02-10	0.6		0.4	1.1		2.1	3.3		0	-72	18
EEC109	1	B	2022-02-10	0.6		0.2	1		1.9	2.7		0	-45	17
EEC109	1	C	2022-02-10	0.6		0.4	1		1.5	2.1		0	-10	16
EEC108	1	A	2022-02-23	2	0.8	1.1	1.8		2.3	2.5		61.8	-5	3
EEC108	1	B	2022-02-23	2	0.7	1.4	1.9		2.3	2.5		58.7	-6	6
EEC108	1	C	2022-02-23	2	0.8	1.7	2.1		2.7	2.9		63.4	-8	6
EEC106	1	A	2022-02-23	-0.5		0.8	1.4		2.5	3.2		0	-22	12
EEC106	1	B	2022-02-23	-0.5		0.4	1.2		2.3	3.1		0	-34	14
EEC106	1	C	2022-02-23	-0.5		0.5	1.2		2.1	2.8		0	-34	16
EEC105	1	A	2022-02-23	-2.5		0.2	0.7		1.6	2.2		0	-59	5
EEC105	1	B	2022-02-23	-2.5		0.1	0.5		1.2	1.9		0	-59	5
EEC105	1	C	2022-02-23	-2.1		0.3	0.8		1.6	2.3		0	-58	5
EEC104	1	A	2022-02-23	0.5	0.9	0.8	1.4		2.2	2.8		20.8	-32	4
EEC104	1	B	2022-02-23	0.5		0.3	0.9		1.7	2.3		0	-30	4
EEC104	1	C	2022-02-23	0.5	0.6	1.2	1.8		2.3	2.8		45.4	-26	4
EEC109	1	A	2022-02-21	0.9		0.3	1		1.9	2.7		0	-68	9
EEC109	1	B	2022-02-21	0.9		0.1	0.9		1.7	2.6		0	-37	11
EEC109	1	C	2022-02-21	0.9		0.4	0.8		1.4	1.8		0	0	10
EEC108	1	A	2022-03-11	0.2		0.5	1		1.8	1.9		0	-20
EEC108	1	B	2022-03-11	0.2		0.5	1.1		1.6	1.9		0	-22
EEC108	1	C	2022-03-11	0.2		0.5	1		1.6	1.9		0	-26
EEC106	1	A	2022-03-08	-4		0.1	1.1		2.2	3		0	-37	6
EEC106	1	B	2022-03-08	-4	-0.3	0.9	1.5		2.3	3		40.8	-38	9
EEC106	1	C	2022-03-08	-4	-0.4	1.2	1.4		2.3	2.9		49.1	-46.5	9
EEC105	1	A	2022-03-08	-4		0.5	1.1		1.9	2.5		0	-68
EEC105	1	B	2022-03-08	-4		0.1	0.8		1.7	2.3		0	-68
EEC105	1	C	2022-03-08	-4		0.4	1		1.7	2.3		0	-66
EEC104	1	A	2022-03-08	-4		0.3	1.1		2.1	2.8		0	-39
EEC104	1	B	2022-03-08	-4		0.2	1.5		2	2.8		0	-36
EEC104	1	C	2022-03-08	-4		0.6	1.3		2.1	2.6		0	-32.5
EEC109	1	A	2022-03-09	-1		-0.1	0.7		1.9	2.6		0	-72
EEC109	1	B	2022-03-09	-1		0.2	0.8		1.8	2.2		0	-46.5
EEC109	1	C	2022-03-09	-1		0.4	1		1.6	1.9		0	-13
EEC108	1	A	2022-03-24	4.2	3.7	1.4	1.7		1.9	2.1		62	-17
EEC108	1	B	2022-03-24	4.2	5.9	1.1	1.5		1.8	2		44.3	-17
EEC108	1	C	2022-03-24	4.2	6.6	1	1.5		1.9	2.1		52	-23
EEC106	1	A	2022-03-22	10.7		-0.1	0.6		1.7	2.4		0	-40
EEC106	1	B	2022-03-22	10.7		0	0.9		1.7	2.5		0	-41
EEC106	1	C	2022-03-22	10.7		-0.1	0.5		1.4	2.2		0	-39
EEC105	1	A	2022-03-22	8.4	5.3	0.4	1		1.6	2.2		51.7	-71
EEC105	1	B	2022-03-22	8.4		-0.1	0.4		1.1	1.7		0	-70
EEC105	1	C	2022-03-22	8.4		-0.1	0.3		1	1.6		0	-72
EEC104	1	A	2022-03-22	3.1	0.3	0.5	1.1		1.8	2.5		28.9	-47
EEC104	1	B	2022-03-22	3.1		-0.1	0.3		0.9	1.5		0	-47
EEC104	1	C	2022-03-22	3.1		0.1	0.9		1.7	2.3		0	-42
EEC109	1	A	2022-03-25	8.5	8.1	0.4	0.7		1.5	1.9		50.5	-72
EEC109	1	B	2022-03-25	8.5	8.3	0	0.6		1.4	2.1		52.5	-44.5
EEC109	1	C	2022-03-25	8.5	4.2	0.1	0.6		1.1	1.5		47.1	-3
EEC108	1	A	2022-04-10	6.3	8.4	3	3		3	3		62.4	-5
EEC108	1	B	2022-04-10	6.3	7.7	2.9	2.9		2.8	2.9		59.4	-5
EEC108	1	C	2022-04-10	6.3	6.4	2.6	2.7		2.7	2.7		64	-5.5
EEC106	1	A	2022-04-10	8.1	12.4	1.5	1.7		2.2	2.4		53.5	-29
EEC106	1	B	2022-04-10	8.1	8.5	0.9	1.3		2.1	2.4		57.5	-29
EEC106	1	C	2022-04-10	8.1	8.3	1.1	1.6		2	2.3		56.4	-29
EEC105	1	A	2022-04-10	4.1	5.2	0.3	0.8		1.5	2.2		59.4	-65.5
EEC105	1	B	2022-04-10	4.1		-0.1	0.4		1	1.5		0	-64
EEC105	1	C	2022-04-10	4.1		-0.1	0.3		0.9	1.8		0	-63
EEC104	1	A	2022-04-10	6.2	6.3	1.1	1.7		2.2	2.5		41.6	-37
EEC104	1	B	2022-04-10	6.2	6.3	0.1	0.6		1.2	1.5		58	-34
EEC104	1	C	2022-04-10	6.2		0	0.9		1.5	1.9		0	-25
EEC109	1	A	2022-04-11	9.7	14.8	4.5	4.4		4.1	4		31.9	-70
EEC109	1	B	2022-04-11	9.7	13.4	1.4	1.8		1.9	2.2		54.9	-38
EEC109	1	C	2022-04-11	9.7	10.4	0.7	1.3		1.8	2.1		65.3	-1
EEC108	1	A	2022-04-30	12	10	6	6		5	5		100	16
EEC108	1	B	2022-04-30	12	10	6	6		5	5		100	14
EEC108	1	C	2022-04-30	13	10	6	6		5	5		100	14
EEC106	1	A	2022-04-27	11.2	10.7	5.5	6.3		5.6	5.4		41.2	-30.5
EEC106	1	B	2022-04-27	11.2	10.1	5.2	5.5		5.2	5.2		45	-32.5
EEC106	1	C	2022-04-27	11.2	10.1	5.3	5.6		5.4	5.3		47.7	-30.5
EEC105	1	A	2022-04-27	11.2	19.1	5.8	5.7		5.4	5.3		28.5	-65
EEC105	1	B	2022-04-27	11.2	10.5	4.8	5.2		5	5		48	-65
EEC105	1	C	2022-04-27	11.2	11.3	4.8	5		4.7	4.8		54.4	-62
EEC104	1	A	2022-04-27	5.2	5.5	5.6	5.7		5.5	5.4		32.1	-30
EEC104	1	B	2022-04-27	5.1	4.8	3.7	4		3.5	3.5		42	-27
EEC104	1	C	2022-04-27	5	4.4	3	3.3		3.1	3.1		50.7	-24.5
EEC109	1	A	2022-04-29	12	11.8	6.6	6.5		6.4	6.2		49	-71
EEC109	1	B	2022-04-29	12	10.1	6.4	5.8		5.5	5.5		56.6	-40.5
EEC109	1	C	2022-04-29	12	10.8	6.5	5.8		5.7	5.6		63.9	-7.5
EEC108	1	A	2022-05-13	16	18.3	8.4	8.1		8	8		62.7	-2
EEC108	1	B	2022-05-13	16	16	8.1	7.9		7.8	7.9		61.7	-2
EEC108	1	C	2022-05-13	16	12.9	8.3	7.9		7.6	7.8		65.8	0
EEC106	1	A	2022-05-12		10.9	7.6	7.5		6.9	6.9		45.9
EEC106	1	B	2022-05-12		10.7	7.5	7.3		7	7		49.2	-46
EEC106	1	C	2022-05-12		10.7	7.4	7.3		6.7	6.7		50.9	-43
EEC105	1	A	2022-05-12		11.1	8	7.8		7.1	7		51.7	-70.5
EEC105	1	B	2022-05-12		10.6	7.6	7.3		6.7	6.6		53.7	-70.5
EEC105	1	C	2022-05-12		10.6	7.1	7.1		6.4	6.4		46.5	-70
EEC104	1	A	2022-05-12			7	6.9		7.7	7.5		0	-51
EEC104	1	B	2022-05-12			6.9	6.6		6.1	6		0	-47
EEC104	1	C	2022-05-12			6.3	6		5.5	5.3		0	-44
EEC109	1	A	2022-05-12									0
EEC109	1	B	2022-05-12									0
EEC109	1	C	2022-05-12									0
EEC108	1	A	2022-05-24	19.9	22.9	10.1	10		9.3	8.6		59.3	-21.5
EEC108	1	B	2022-05-24	19.9	21.3	10.6	9.9		9.1	8.4		51.2	-23
EEC108	1	C	2022-05-24	19.9	20.8	9.7	9.2		8.7	7.9		51.1	-27.5
EEC106	1	A	2022-05-24	22.8	23.7	9.2	9.3		8.9	7.6		42.8	-47.5
EEC106	1	B	2022-05-24	22.8	20	9	9.1		8.7	7.6		42.6	-50.5
EEC106	1	C	2022-05-24	22.8	23.5	8.8	9.3		9.2	7.5		26.7	-48.5
EEC105	1	A	2022-05-24	16	26.3	9.6	9.7		9.3	7.5		33.4	-71.5
EEC105	1	B	2022-05-24	16	27.3	9.5	9.6		9.3	7.4		56.5	-78
EEC105	1	C	2022-05-24	16	22.4	8.2	8.1		7.7	6.8		25.7	-74.5
EEC104	1	A	2022-05-24	24	24.1	9.1	9.5		9.2	7.5		27.1	-57.5
EEC104	1	B	2022-05-24	24	22.9	8.8	8.6		8.3	6.9		22.1	-57.5
EEC104	1	C	2022-05-24	24	22.6	7.8	8		7.6	6.3		23.2	-54
EEC109	1	A	2022-05-28	15.3	14.4	10.6	10.8		10.6	9.3		37.7	-72
EEC109	1	B	2022-05-28	15.8	15.5	10.3	10.4		10.2	8.5		48.4	-60
EEC109	1	C	2022-05-28	16	16.6	10.2	10.3		10.2	8.4		65.6	-25
EEC108	1	A	2022-06-09	17	17.3	13.1	12.7		12.1	11		55	-26
EEC108	1	B	2022-06-09	17	17.2	12.8	12.6		12	11.1		57.1	-24
EEC108	1	C	2022-06-09	17	17.7	12.4	11.8		11.1	10		45.2	-27
EEC106	1	A	2022-06-08	21	21.2	13.4	12.7		12	10.1		25.8	-54
EEC106	1	B	2022-06-08	21	19	12.8	12.4		11.5	9.7		43.4	-56.3
EEC106	1	C	2022-06-08	21	19.3	12.5	12.1		11.3	9.2		31.5	-54
EEC105	1	A	2022-06-08	16	21.9	12.5	12		11.5	9.2		22	-84.5
EEC105	1	B	2022-06-08	16	19.6	13.2	12.3		11.5	9.3		41.1	-80
EEC105	1	C	2022-06-08	16	20	12.3	12.3		11.3	9.1		47	-79
EEC104	1	A	2022-06-08	19	19.2	13.3	12.7		11.9	9.7		46.6	-57.5
EEC104	1	B	2022-06-08	19	18.6	13	11.9		11.2	9		48.1	-56.5
EEC104	1	C	2022-06-08	19	18.8	12.3	11.6		11.2	9.1		37.5	-54
EEC109	1	A	2022-06-10	23	21.9	14.7	14.3		13.7	11.1		47.9	-71
EEC109	1	B	2022-06-10	23	21.6	14.3	13.9		13.2	10.6		43.5	-61
EEC109	1	C	2022-06-10	23	20	12.7	12.6		11.9	10.2		57.6	-25.5
EEC108	1	A	2022-06-21	16	16.1	12.8	12.9		12.6	12		40.6	-25.5
EEC108	1	B	2022-06-21	16	15.5	12.6	12.5		12.3	11.5		51	-23
EEC108	1	C	2022-06-21	16	16.1	12.4	12.2		11.9	11.2		39.1	-27
EEC106	1	A	2022-06-21	20.9	27.8	13.4	13.4		12.7	11.4		25.2	-60.5
EEC106	1	B	2022-06-21	20.9	21.5	13.3	13.4		12.9	11.2		47	-100
EEC106	1	C	2022-06-21	20.9	21.1	13.1	12.8		12.1	10.5		27.1	-64
EEC105	1	A	2022-06-21	19.7	22.8	13.8	13.3		12.8	11.1		25.1	-82
EEC105	1	B	2022-06-21	19.7	21.6	13.8	13.8		13.1	11.4		43.1	-82
EEC105	1	C	2022-06-21	19.7	20.6	13.2	12.8		12.5	10.7		30.3	-85
EEC104	1	A	2022-06-21	16.8	20.5	13.1	13.1		12.5	11.1		33.3	-62
EEC104	1	B	2022-06-21	16.8	20.9	12.9	12.6		12.3	10.6		23.4	-59
EEC104	1	C	2022-06-21	16.8	18.8	12	12		11.4	9.9		46.6	-56
EEC109	1	A	2022-06-22	19.8	24	14.2	14.5		14.3	12.6		24.3	-72
EEC109	1	B	2022-06-22	19.8	23.8	14	14.5		14.2	12.5		43.8	-66
EEC109	1	C	2022-06-22	19.8	24.4	13.2	13.5		13.2	11.5		69.2	-27.5
EEC108	1	A	2022-07-11		21.3	15.2	14.8		14.2	13.9		36.3	-28.5
EEC108	1	B	2022-07-11		21.1	14.7	14.4		14.1	13.6		21.1	-26
EEC108	1	C	2022-07-11		20.4	14.5	14.1		13.7	13.1		29.2	-27
EEC106	1	A	2022-07-11	20	20.9	15.1	15.1		14.2	13.4		17.3	-69
EEC106	1	B	2022-07-11	20	20.4	15.2	15.1		14.3	13.1		21.4	-76
EEC106	1	C	2022-07-11	20	20.2	15.4	15		14.2	13		15.9	-71.5
EEC105	1	A	2022-07-11	20	22	15.4	15.4		14.5	13.3		22.1	-92
EEC105	1	B	2022-07-11	20	21.7	15.4	15.4		14.6	13.3		35.7	-93
EEC105	1	C	2022-07-11	20	20.5	14.8	14.9		14.2	13.3		19.2	-101
EEC104	1	A	2022-07-11		22.5	15.4	15.4		14.4	13.5		15	-61
EEC104	1	B	2022-07-11		22.4	15.8	15.3		14.6	13.7		19.5	-62
EEC104	1	C	2022-07-11		21.2	14.5	14.4		13.7	12.6		13.8	-58
EEC109	1	A	2022-07-14	19.6	19.7	17	17.3		17.2	15.4		16.3	-71
EEC109	1	B	2022-07-14	19.6	19.7	16.6	16.4		16.4	14.4		20.3	-71
EEC109	1	C	2022-07-14	19.6	19.5	16.2	16		15.2	14		51.2	-55
EEC108	1	A	2022-07-27	21.2	21.3	16.6	16.1		14.9	14.6		47.7	-30.4
EEC108	1	B	2022-07-27	21.2	19.9	16.2	15.9		15.1	14.7		46.6	-29
EEC108	1	C	2022-07-27	21.2	19.7	14.4	13.9		15.9	15.7		41.1	-28.5
EEC106	1	A	2022-07-26	24.3	27.1	17.3	16.8		15.4	14.2		18	-63.5
EEC106	1	B	2022-07-26	24.3	25.2	17.4	17		15.3	14.4		32.3	-67
EEC106	1	C	2022-07-26	24.3	25.1	16.9	16.5		15.2	14.4		20.6	-68.5
EEC105	1	A	2022-07-26	24	26.3	17.8	16.9		16.2	14.2		23.2	-91
EEC105	1	B	2022-07-26	24	24.5	17.4	16.6		15.3	14.4		23.9	-89
EEC105	1	C	2022-07-26	24	25.2	17.5	16.6		14.9	14.1		23.8	-97
EEC104	1	A	2022-07-26	24	23.8	17.3	17		15.2	14.3		31.4	-57
EEC104	1	B	2022-07-26	24	23.8	17.3	17.5		16.2	14.6		25.1	-55
EEC104	1	C	2022-07-26	24	24.5	16.5	15.1		13.8	13		22.1	-55
EEC109	1	A	2022-07-26									0
EEC109	1	B	2022-07-26									0
EEC109	1	C	2022-07-26									0
EEC108	1	A	2022-08-13	27	24.8	16.2	15.7		14.9	14.3		32.1	-28
EEC108	1	B	2022-08-13	27	23.5	15.7	15.2		14.4	14		26.5	-26
EEC108	1	C	2022-08-13	26	23.4	15.6	15.1		14.3	13.8		30.9	-27
EEC106	1	A	2022-08-10	18	18.5	15.1	15.5		14.8	14.3		23.9	-112.5
EEC106	1	B	2022-08-10	18.5	18.8	14.8	15.1		14.4	13.9		18.7	-118
EEC106	1	C	2022-08-10	19	19	14.6	14.8		14.3	14.5		20	-121
EEC105	1	A	2022-08-10	26.7	27.6	15.2	15.8		14.8	14.4		18.2	-91
EEC105	1	B	2022-08-10	24	24.3	15.1	15.3		14.8	14.3		28	-91.5
EEC105	1	C	2022-08-10	23.7	23.1	14.7	14.9		14.4	13.9		29.2	-100
EEC104	1	A	2022-08-10	16	15.1	14.8	15		14.4	14		18.4	-98
EEC104	1	B	2022-08-10	16	15	15.3	15.5		14.8	14.4		19	-93
EEC104	1	C	2022-08-10	16	14.4	14.6	14.7		14.1	13.6		23.6	-95
EEC109	1	A	2022-08-11	25	23.7	17.3	16.8		16	15.4		20.5	-72
EEC109	1	B	2022-08-11	24	24.1	17	16.5		15.6	15.1		17.7	-74
EEC109	1	C	2022-08-11	24	24	15.8	15.9		15.1	14.1		32	-81
EEC108	1	A	2022-08-27	20	26.4	16.5	16.3		15.7	15.5		29.6	-29
EEC108	1	B	2022-08-27	20	25.1	17	16.5		15.8	15.7		26.7	-26
EEC108	1	C	2022-08-27	20	24.8	16.3	16.2		15.3	15		25.3	-27
EEC106	1	A	2022-08-27	18	23	16.9	16.8		15.9	15.2		22	-107.5
EEC106	1	B	2022-08-27	18	21.8	16.9	16.9		16	14.9		12	-109.5
EEC106	1	C	2022-08-27	18	22	16.8	16.9		15.9	15.1		17.2	-116.5
EEC105	1	A	2022-08-27	16	21.1	16.7	16.9		16.1	15.2		20	-89.5
EEC105	1	B	2022-08-27	16	20.8	16.9	17.1		16.3	15.7		23.6	-88.5
EEC105	1	C	2022-08-27	16	20	16.8	16.9		16.3	15.6		19.2	-99
EEC104	1	A	2022-08-27	20	26.7	18.2	17.8		16.9	15.9		23.3	-97.5
EEC104	1	B	2022-08-27	20	26.1	17.3	17.2		16.3	15.6		16.4	-75
EEC104	1	C	2022-08-27	20	24	16.2	15.9		15.1	14.3		21.5	-74
EEC109	1	A	2022-08-29	27	26.5	18.8	18.9		17.8	17.6		17	-72
EEC109	1	B	2022-08-29	27	26.6	18.6	18.1		17.2	17.2		28.1	-74
EEC109	1	C	2022-08-29	27	24.8	18	17.8		16.9	16.3		23.4	-93.5
EEC108	1	A	2022-09-13	14	12.7	10.9	11.2		11.3	11.4		26.4	-28
EEC108	1	B	2022-09-13	13	12.3	11	11.1		11.2	11.4		37.6	-26
EEC108	1	C	2022-09-13	13	12	10.9	11.2		11.3	11.4		22.8	-27
EEC106	1	A	2022-09-13	12.5	12.5	11	11.4		11.7	11.9		28.1	-114.5
EEC106	1	B	2022-09-13	12.5	12.6	10.4	11		11.3	11.5		21.3	-118
EEC106	1	C	2022-09-13	12.5	13	10.5	10.9		11.3	11.5		21.4	-123
EEC105	1	A	2022-09-13	14	13.8	11.2	11.7		12.1	12.2		16	-92
EEC105	1	B	2022-09-13	13	13.3	10.7	11.1		11.5	11.6		21	-92
EEC105	1	C	2022-09-13	13	13.1	10.6	11		11.4	11.6		23.2	-100
EEC104	1	A	2022-09-13	12	12.6	11.3	11.6		11.9	12		35.7	-98
EEC104	1	B	2022-09-13	12	12.3	11.3	11.6		11.8	11.9		26	-94
EEC104	1	C	2022-09-13	12	12.1	10.5	10.9		11.2	11.3		22.3	-98
EEC109	1	A	2022-09-14	14	13.5	12.1	12.5		13	13.2		11.9	-73
EEC109	1	B	2022-09-14	14	14	12.5	12.9		13.2	13.5		15.2	-73
EEC109	1	C	2022-09-14	14	14.4	12	12.2		12.4	12.6		16.2	-97
EEC108	1	A	2022-09-28	8	8.6	9.3	9.7		10.2	10.3		28.1	-28
EEC108	1	B	2022-09-28	8	8.7	9	9.7		10.3	10.4		30.4	-26
EEC108	1	C	2022-09-28	8	9.2	9.4	9.9		10.3	10.4		28.9	-27
EEC106	1	A	2022-09-27	11.5	10.7	9.1	9.9		10.6	10.9		20.6	-114.5
EEC106	1	B	2022-09-27	12	12	8.7	9.5		10.2	10.6		18.5	-118
EEC106	1	C	2022-09-27	12	12.3	8.8	9.2		10	10.5		14.6	-122
EEC105	1	A	2022-09-27	16	15.8	9.4	10.2		10.7	11.1		12.5	-90
EEC105	1	B	2022-09-27	15	14.1	8.9	9.6		10.3	10.8		25.6	-89
EEC105	1	C	2022-09-27	15	13.5	8.9	9.6		10.2	10.6		23.8	-99
EEC104	1	A	2022-09-27	7.5	7.6	9.3	9.7		10.5	10.9		34.6	-98
EEC104	1	B	2022-09-27	7.5	7.7	8.8	9.6		10.2	10.7		31	-89
EEC104	1	C	2022-09-27	7.5	7.7	9	9.6		10.1	10.4		28.5	-98
EEC109	1	A	2022-09-29	9.5	9.6	9.9	10.8		11.6	12		18.6	-72
EEC109	1	B	2022-09-29	10	10.6	10.5	11.2		11.7	12.2		15.8	-73
EEC109	1	C	2022-09-29	10	10.3	9.9	10.5		11	11.2		33.4	-96
EEC108	1	A	2022-10-11	7	8.5	9.1	9.5		9.9	10.1		35.5	-28
EEC108	1	B	2022-10-11	7	8.4	9.1	9.5		9.9	10.1		36.8	-27
EEC108	1	C	2022-10-11	7	8.5	9.2	9.6		10	10.2		38.7	-28
EEC106	1	A	2022-10-11	6	7.7	8.4	8.7		9.8	10		30.8	-114.5
EEC106	1	B	2022-10-11	6	7.3	8.4	9		9.8	10.2		30	-117.5
EEC106	1	C	2022-10-11	6	7.2	8.5	8.8		9.7	10		35.2	-115.5
EEC105	1	A	2022-10-11	6	6.2	8.6	9.4		10.1	10.4		43.7	-91
EEC105	1	B	2022-10-11	6	6.9	8.5	9.3		9.9	10.2		32.1	-89
EEC105	1	C	2022-10-11	6	6.7	8.4	9.1		9.8	10.1		21.6	-100
EEC104	1	A	2022-10-11	6	7.4	8.5	9.2		9.9	10.3		37.8	-98
EEC104	1	B	2022-10-11	6	7.8	8.4	9.1		9.9	10.3		37.8	-91
EEC104	1	C	2022-10-11	6	8.5	8.7	9		9.7	9.9		32.8	-100
EEC109	1	A	2022-10-12	14	12.7	8.5	9.6		11.2	12		33.9	-72
EEC109	1	B	2022-10-12	14	12.2	9.2	10.5		11.3	12		26.8	-75
EEC109	1	C	2022-10-12	14	12.8	8.5	9.3		10.2	10.7		44.6	-96
EEC108	1	A	2022-10-24	10	7	7.3	8.3		8.3	8.5		38.6	-30
EEC108	1	B	2022-10-24	10	6.9	6.9	8.1		8.1	8.3		40.7	-28
EEC108	1	C	2022-10-24	9	6.2	6.6	8.2		8.2	8.5		49	-29
EEC106	1	A	2022-10-24	4	2.6	6.2	6.9		8	8.7		34.4	-114
EEC106	1	B	2022-10-24	4	2.3	6.2	6.7		7.8	8.5		40.6	-115
EEC106	1	C	2022-10-24	4	2.9	5.8	6.9		8.1	8.6		44.3	-115.5
EEC105	1	A	2022-10-24	2	3.4	6.9	7.6		8.6	9.1		24.7	-90
EEC105	1	B	2022-10-24	2	2.8	6.6	7.4		8.2	8.9		32.6	-89
EEC105	1	C	2022-10-24	2	2.9	6.2	6.9		7.8	8.7		42.3	-100
EEC104	1	A	2022-10-24	10	8.1	6.6	7.5		8.4	8.9		48.2	-98
EEC104	1	B	2022-10-24	10	7.5	6.1	7.2		8.2	8.8		35	-91
EEC104	1	C	2022-10-24	10	4.7	6.5	7.5		8.1	8.7		36.8	-100
EEC109	1	A	2022-10-30	7.4	7.6	8.8	9.6		10.1	10.5		12.6	-73
EEC109	1	B	2022-10-30	7.5	7.2	9.3	10		10.5	10.6		36.2	-74
EEC109	1	C	2022-10-30	7.7	7.7	9.2	9.5		9.4	9.5		35.7	-100
EEC108	1	A	2022-11-10	10	10.6	8.7	8.4		8.2	8.3		48.1	-27
EEC108	1	B	2022-11-10	10	10	8.6	8.4		8	8.1		48.3	-26
EEC108	1	C	2022-11-10	10	10.2	8.8	8.6		8.2	8.3		44.2	-27
EEC106	1	A	2022-11-08	9	8.6	7	7.4		7.4	7.9		47.1	-112.5
EEC106	1	B	2022-11-08	9	9	7.2	7.1		7.3	7.9		43.5	-116
EEC106	1	C	2022-11-08	9.5	9.3	8	7.2		7.5	7.8		44.3	-120
EEC105	1	A	2022-11-08	9	8.5	7.3	7.4		7.7	8.3		36.6	-89
EEC105	1	B	2022-11-08	9	9.1	7.5	7.4		7.5	8.2		35.6	-89
EEC105	1	C	2022-11-08	8.5	9	7.5	7.4		7.5	8		37	-99
EEC104	1	A	2022-11-08	9	8.9	7.4	7.7		7.9	8.3		35.9	-96
EEC104	1	B	2022-11-08	9	9	7.2	7.5		7.7	8.2		41.1	-91
EEC104	1	C	2022-11-08	9	9	7.3	7.5		7.5	8		40	-100
EEC109	1	A	2022-11-11	10	9	10	9.4		9.4	9.9		35.9	-72
EEC109	1	B	2022-11-11	10	9.4	9.3	9.7		9.8	9.8		33.7	-76
EEC109	1	C	2022-11-11	9.5	9.4	9.5	8.7		8.5	8.7		47.6	-89
EEC108	1	A	2022-11-25	-2	-0.1	2.5	3.3		4.6	5.3		43	-27	3
EEC108	1	B	2022-11-25	-2	0.1	2.7	3.6		4.5	5.1		45.1	-26	4
EEC108	1	C	2022-11-25	-2	0.1	2.6	3.7		4.3	5.1		39.8	-27	4
EEC106	1	A	2022-11-22	-3	-0.1	2.4	3.8		5.1	6.3		35.2	-75.5	15
EEC106	1	B	2022-11-22	-3	-0.1	2	3.3		5	6.1		46.5	-82	16
EEC106	1	C	2022-11-22	-3	-0.1	2.7	3.9		5.4	6.3		40.6	-81.5	12
EEC105	1	A	2022-11-25	-4.5	-0.4	2	3.5		4.8	6.1		27.8	-90	6
EEC105	1	B	2022-11-25	-4	-0.5	1.7	3.1		4.8	5.9		15.6	-89	8
EEC105	1	C	2022-11-25	-4	-0.4	1.6	2.8		4.5	5.7		29.5	-99	7
EEC104	1	A	2022-11-22	-4	-0.1	2.9	4.4		5.6	6.8		41.9	-90	14
EEC104	1	B	2022-11-22	-4	-0.3	2	3.2		5.5	6.4		34.3	-89.5	20
EEC104	1	C	2022-11-22	-4	-0.1	2.7	4		5.1	6.4		38.7	-99	12
EEC109	1	A	2022-11-24	-3	0.1	2.1	4.1		6.2	7.8		38.2	-72	6
EEC109	1	B	2022-11-24	-3	0.2	3	5.1		6.5	7.7		35.4	-75	10
EEC109	1	C	2022-11-24	-3	0	3.3	4.7		5.8	6.9		41	-73	12
EEC108	1	A	2022-12-07	-3	0.2	2	3.3		3.8	4.3		45.2	-27	11
EEC108	1	B	2022-12-07	-3	-0.3	1.8	2.7		3.4	3.8		38.7	-26	13
EEC108	1	C	2022-12-07	-4	-0.6	1.9	3.3		4	4.3		44.5	-28	14
EEC106	1	A	2022-12-08	0.1	0.2	1.5	2.8		3.8	4.7		38.2	-99.5	24
EEC106	1	B	2022-12-08	0.1	0.3	1.9	2.7		4.1	4.8		31.4	-88	25
EEC106	1	C	2022-12-08	0.1	0.2	1.4	2.4		3.7	4.6		27.4	-95	24
EEC105	1	A	2022-12-10	-10	-0.8	1.2	2.2		3.4	4.3		34.7	-90	19
EEC105	1	B	2022-12-10	-10	-1	0.6	2.1		2.8	4.5		30.6	-90	20
EEC105	1	C	2022-12-10	-10	-1.3	1.3	2.3		3.3	4.3		39.3	-98	19
EEC104	1	A	2022-12-08	-1.2	0.2	1.1	2.4		3.6	4.5		32.2	-97	24
EEC104	1	B	2022-12-08	-0.9	0.6	0.6	1.9		3.2	4.3		16.7	-93	16
EEC104	1	C	2022-12-08	-0.6	0.1	1	2.3		3.5	4.3		30.3	-100	16
EEC109	1	A	2022-12-07	-3	-0.1	1.4	2.7		4.9	6		39.4	-73	14
EEC109	1	B	2022-12-07	-3	-0.3	1.3	2.8		4.5	5.5		29.7	-74	15
EEC109	1	C	2022-12-07	-3	-0.3	1.8	2.8		3.8	5		34.5	-70	14
EEC108	1	A	2022-12-20	-4.5	-0.4	0.9	2.2		3.3	3.7		62	-28	15
EEC108	1	B	2022-12-20	-4.2	-0.5	0.7	2.3		3.3	3.3		61.5	-27	13
EEC108	1	C	2022-12-20	-4.1	-0.9	0.3	1.9		3.5	3.7		61.4	-28	14
EEC106	1	A	2022-12-28	-1	0.1	0.9	1.9		2.6	3.3		45	-62.5	12
EEC106	1	B	2022-12-28	-1	-0.1	0.7	1.4		2.3	3		48.8	-68	7
EEC106	1	C	2022-12-28	-1	0.1	1	1.9		2.7	3.5		42.4	-55	6
EEC105	1	A	2022-12-28	-1	1	0.8	2.1		2.9	3.1		55	-91	10
EEC105	1	B	2022-12-28	-1	1	0.1	1.4		2.3	3.1		50	-91	12
EEC105	1	C	2022-12-28	-1	1	0.9	1.8		2.5	3.2		50	-99	12
EEC104	1	A	2022-12-28	-1	0.9	0.9	1.8		2.9	3.5		34.5	-95	11
EEC104	1	B	2022-12-28	-1	0.4	1.3	1.9		2.6	3.2		52.4	-91	11
EEC104	1	C	2022-12-28	-1	0.5	1.1	2.7		3.2	3.7		37.5	-95	11
EEC109	1	A	2022-12-22	2	0.8	0.8	2.8		3.9	5.4		55.3	-71	14
EEC109	1	B	2022-12-22	2	0.8	1.1	2.9		4.1	5		52.2	-74	13
EEC109	1	C	2022-12-22	2	0.7	1.3	2.6		3.4	4.1		53.1	-62	13
LTC104	1	B	2021-09-27	12	11.3	10			11.4	11.4			-89.3333
LTC105	1	B	2021-10-04	15.5	13.3	11.2			11.4	11.5
LTC106	1	B	2021-10-06	18	14.3	11.1			11.8	11.9			-96.6667
LTC104	1	B	2021-10-20	11	12.6	9.8			9.2	8.9			-99.6667
LTC105	1	B	2021-10-25	15	13.7	9.2			9.1	9.2
LTC106	1	B	2021-11-01	12	8.4	7.8			9.4	9.6			-82.3333
LTC108	1	B	2021-11-12	9.8	6.9	6.2			7.5	8			-22
LTC109	1	B	2021-11-12	11	7.3	6.3			7.4	8.2			-28.3333
LTC104	1	B	2021-11-29	0.5	0	0.8			3.3	5.1			-89.3333	1
LTC105	1	B	2021-11-30	-6.2	-2.7	0.8			3.7	4.9				6
LTC106	1	B	2021-12-09	-5.3	-2.7	0.7			1.9	2.6			-54.3333	6
LTC108	1	B	2022-01-05
LTC109	1	B	2022-01-05
LTC104	1	B	2021-07-21	27	18.7	17.4			17.2	16.9			-97.6667
LTC105	1	B	2021-08-04	23	21.3	20.4			19.7	18.8
LTC106	1	B	2021-07-19	30	20.4	18.5			16.7	16.3			-111.333
LTC108	1	B	2021-07-12	28	27.4	21.3			18.3	17.3			-27.6667
LTC109	1	B	2021-07-12	28	27	21.7			18.4	17.7			-38.6667
LTC104	1	B	2022-01-04	4	2	21.7			18.4	17.7			-56.6667	0
LTC105	1	B	2022-01-10	0	-0.1	0.1			2.9	3.8				1
LTC106	1	B	2022-01-11	-4.6	-3	0			1.4	2			-50
[truncated: 84 more rows]

## Sheet: fine_litterfall
site	plot	subplot	replicate_id	year	flf_annual
LTC104	1	B	1	2021	9.8
LTC104	1	B	2	2021	8.8
LTC104	1	B	3	2021	6.8
LTC104	1	B	4	2021	7.3
LTC104	1	B	5	2021	10.3
LTC105	1	B	1	2021	2.81
LTC105	1	B	2	2021	3.03
LTC105	1	B	3	2021	2.91
LTC105	1	B	4	2021	3.59
LTC105	1	B	5	2021	3.61
LTC106	1	B	1	2021	4.29
LTC106	1	B	2	2021	4.06
LTC106	1	B	3	2021	4.03
LTC106	1	B	4	2021	4.25
LTC106	1	B	5	2021	4.1
LTC108	1	B	1	2021	4.5398
LTC108	1	B	2	2021	4.6412
LTC108	1	B	3	2021	4.595
LTC108	1	B	4	2021	4.137
LTC108	1	B	5	2021	3.9169
LTC109	1	B	1	2021	2.16
LTC109	1	B	2	2021	2.1
LTC109	1	B	3	2021	2.15
LTC109	1	B	4	2021	4.06
LTC109	1	B	5	2021	0.52
EEC104	1	A	1	2021	6.596
EEC104	1	B	1	2021	9.004
EEC104	1	C	1	2021	5.636
EEC105	1	A	1	2021	9.668
EEC105	1	B	1	2021	9.004
EEC105	1	C	1	2021	8.26
EEC106	1	A	1	2021	6.664
EEC106	1	B	1	2021	6.988
EEC106	1	C	1	2021	6.88
EEC108	1	A	1	2021	9.25468
EEC108	1	B	1	2021	8.32464
EEC108	1	C	1	2021	8.00488
EEC109	1	A	1	2021	3.09992
EEC109	1	B	1	2021	4.35924
EEC109	1	C	1	2021	5.6792
EEC104	1	A	1	2022	2.976
EEC104	1	A	2	2022	3.384
EEC104	1	B	1	2022	7.292
EEC104	1	B	2	2022	4.736
EEC104	1	C	1	2022	2.632
EEC104	1	C	2	2022	1.78
EEC105	1	A	1	2022	3.4
EEC105	1	A	2	2022	3.24
EEC105	1	B	1	2022	2.688
EEC105	1	B	2	2022	3.46
EEC105	1	C	1	2022	3.728
EEC105	1	C	2	2022	3.328
EEC106	1	A	1	2022	3.24
EEC106	1	A	2	2022	3.188
EEC106	1	B	1	2022	3.648
EEC106	1	B	2	2022	4.084
EEC106	1	C	1	2022	3.984
EEC106	1	C	2	2022	3.608
EEC108	1	A	1	2022	4.352
EEC108	1	A	2	2022	2.232
EEC108	1	B	1	2022	4.844
EEC108	1	B	2	2022	5.364
EEC108	1	C	1	2022	5.01
EEC108	1	C	2	2022	4.848
EEC109	1	A	1	2022	2.096
EEC109	1	A	2	2022	2.268
EEC109	1	B	1	2022	3.352
EEC109	1	B	2	2022	3.008
EEC109	1	C	1	2022	4.316
EEC109	1	C	2	2022	3.684
LVC104	1	B	1	2022	4.37963
LVC104	1	B	2	2022	4.01797
LVC104	1	B	3	2022	5.28711
LVC104	1	B	4	2022	3.65603
LVC104	1	B	5	2022	1.54403
LVC105	1	B	1	2022	3.22911
LVC105	1	B	2	2022	4.26554
LVC105	1	B	3	2022	3.56197
LVC105	1	B	4	2022	5.18225
LVC105	1	B	5	2022	2.35209
LVC106	1	B	1	2022	2.76812
LVC106	1	B	2	2022	2.7036
LVC106	1	B	3	2022	2.07295
LVC106	1	B	4	2022	2.71523
LVC106	1	B	5	2022	2.48262
LVC107	1	B	1	2022	3.49218
LVC107	1	B	2	2022	3.25855
LVC107	1	B	3	2022	4.25889
LVC107	1	B	4	2022	3.64403
LVC107	1	B	5	2022	3.73172
LVC108	1	B	1	2022	1.94271
LVC108	1	B	2	2022	2.66114
LVC108	1	B	3	2022	2.40462
LVC108	1	B	4	2022	2.69658
LVC108	1	B	5	2022	2.63298
LVC109	1	B	1	2022	2.91582
LVC109	1	B	2	2022	4.01003
LVC109	1	B	3	2022	3.00138
LVC109	1	B	4	2022	2.72262
LVC109	1	B	5	2022	2.72732
LVC110	1	B	1	2022	3.81683
LVC110	1	B	2	2022	4.36052
LVC110	1	B	3	2022	3.73708
LVC110	1	B	4	2022	3.23308
LVC110	1	B	5	2022	3.30766
LVC111	1	B	1	2022	3.01698
LVC111	1	B	2	2022	2.91637
LVC111	1	B	3	2022	2.8332
LVC111	1	B	4	2022	2.83745
LVC111	1	B	5	2022	2.72806
LVC112	1	B	1	2022	2.5288
LVC112	1	B	2	2022	3.678
LVC112	1	B	3	2022	3.4798
LVC112	1	B	4	2022	2.986
LVC112	1	B	5	2022	2.5652
LVC115	1	B	1	2022	2.36926
LVC115	1	B	2	2022	2.37074
LVC115	1	B	3	2022	2.4264
LVC115	1	B	4	2022	2.36105
LVC115	1	B	5	2022	2.35422
LVC116	1	B	1	2022	2.5182
LVC116	1	B	2	2022	3.4008
LVC116	1	B	3	2022	2.8386
LVC116	1	B	4	2022	2.5102
LVC116	1	B	5	2022	2.942
LVC308	1	B	1	2022	2.85563
LVC308	1	B	2	2022	3.30406
LVC308	1	B	3	2022	3.23206
LVC308	1	B	4	2022	3.35188
LVC308	1	B	5	2022	4.35434
LVC309	1	B	1	2022	3.6772
LVC309	1	B	2	2022	4.1124
LVC309	1	B	3	2022	4.6852
LVC309	1	B	4	2022	4.0028
LVC309	1	B	5	2022	4.4426
LVC311	1	B	1	2022	3.1714
LVC311	1	B	2	2022	3.0312
LVC311	1	B	3	2022	3.6374
LVC311	1	B	4	2022	3.5384
LVC311	1	B	5	2022	3.4004
LVC312	1	B	1	2022	1.8456
LVC312	1	B	2	2022	2.574
LVC312	1	B	3	2022	1.6796
LVC312	1	B	4	2022	1.1652
LVC312	1	B	5	2022	2.1786
LVC313	1	B	1	2022	2.8632
LVC313	1	B	2	2022	2.7024
LVC313	1	B	3	2022	4.152
LVC313	1	B	4	2022	5.20453
LVC313	1	B	5	2022	4.80053

## Sheet: fine_root_production
site	plot	subplot	replicate_id	installation_date	sampling_date	seasons	frp
LVC104	1	A	1	2021-05-03	2022-08-16	2	1.10382
LVC104	1	A	2	2021-05-03	2022-08-16	2	0.302459
LVC104	1	A	3	2021-05-03	2022-08-16	2	0.408625
LVC104	1	A	4	2021-05-03	2022-08-16	2	0.641742
LVC104	1	A	5	2021-05-03	2022-08-16	2	1.63197
LVC104	1	B	1	2021-05-03	2022-08-16	2	0.826455
LVC104	1	B	2	2021-05-03	2022-08-16	2	1.23299
LVC104	1	B	3	2021-05-03	2022-08-16	2	0.800668
LVC104	1	B	4	2021-05-03	2022-08-16	2	0.60232
LVC104	1	B	5	2021-05-03	2022-08-16	2	1.00189
LVC104	1	C	1	2021-05-03	2022-08-16	2	1.18125
LVC104	1	C	2	2021-05-03	2022-08-16	2	1.05145
LVC104	1	C	3	2021-05-03	2022-08-16	2	1.64615
LVC104	1	C	4	2021-05-03	2022-08-16	2	0.983698
LVC104	1	C	5	2021-05-03	2022-08-16	2	2.34224
LVC105	1	A	1	2020-11-11	2022-08-17	2	1.23755
LVC105	1	A	2	2020-11-11	2022-08-17	2	1.03522
LVC105	1	A	3	2020-11-11	2022-08-17	2	0.729774
LVC105	1	A	4	2020-11-11	2022-08-17	2	1.12705
LVC105	1	A	5	2020-11-11	2022-08-17	2	0.95359
LVC105	1	B	1	2020-11-11	2022-08-17	2	1.17828
LVC105	1	B	2	2020-11-11	2022-08-17	2	0.689628
LVC105	1	B	3	2020-11-11	2022-08-17	2	0.490587
LVC105	1	B	4	2020-11-11	2022-08-17	2	0.528062
LVC105	1	B	5	2020-11-11	2022-08-17	2	1.13552
LVC105	1	C	1	2020-11-11	2022-08-17	2	0.149671
LVC105	1	C	2	2020-11-11	2022-08-17	2	0.399641
LVC105	1	C	3	2020-11-11	2022-08-17	2	0.198175
LVC105	1	C	4	2020-11-11	2022-08-17	2	0.288601
LVC105	1	C	5	2020-11-11	2022-08-17	2	0.336066
LVC106	1	A	1	2020-11-12	2022-08-17	2	2.18278
LVC106	1	A	2	2020-11-12	2022-08-17	2	1.90709
LVC106	1	A	3	2020-11-12	2022-08-17	2	2.31483
LVC106	1	A	4	2020-11-12	2022-08-17	2	2.93122
LVC106	1	A	5	2020-11-12	2022-08-17	2	2.73986
LVC106	1	B	1	2020-11-12	2022-08-17	2	0.924008
LVC106	1	B	2	2020-11-12	2022-08-17	2	0.663644
LVC106	1	B	3	2020-11-12	2022-08-17	2	0.184317
LVC106	1	B	4	2020-11-12	2022-08-17	2	0.463563
LVC106	1	B	5	2020-11-12	2022-08-17	2	1.74281
LVC106	1	C	1	2020-11-12	2022-08-17	2	1.71446
LVC106	1	C	2	2020-11-12	2022-08-17	2	0.760306
LVC106	1	C	3	2020-11-12	2022-08-17	2	1.35041
LVC106	1	C	4	2020-11-12	2022-08-17	2	1.23236
LVC106	1	C	5	2020-11-12	2022-08-17	2	1.05733
LVC107	1	A	1	2021-04-30	2022-08-08	2	2.8077
LVC107	1	A	2	2021-04-30	2022-08-08	2	2.9113
LVC107	1	A	3	2021-04-30	2022-08-08	2	2.21492
LVC107	1	A	4	2021-04-30	2022-08-08	2	3.22987
LVC107	1	A	5	2021-04-30	2022-08-08	2	4.54573
LVC107	1	B	1	2021-04-30	2022-08-08	2	2.55964
LVC107	1	B	2	2021-04-30	2022-08-08	2	3.09822
LVC107	1	B	3	2021-04-30	2022-08-08	2	2.46043
LVC107	1	B	4	2021-04-30	2022-08-08	2	2.22204
LVC107	1	B	5	2021-04-30	2022-08-08	2	3.10451
LVC107	1	C	1	2021-04-30	2022-08-08	2	3.96276
LVC107	1	C	2	2021-04-30	2022-08-08	2	1.69237
LVC107	1	C	3	2021-04-30	2022-08-08	2	2.46333
LVC107	1	C	4	2021-04-30	2022-08-08	2	1.74957
LVC107	1	C	5	2021-04-30	2022-08-08	2	2.7517
LVC108	1	A	1	2020-11-04	2022-08-10	2	0.683219
LVC108	1	A	2	2020-11-04	2022-08-10	2	0.834622
LVC108	1	A	3	2020-11-04	2022-08-10	2	0.712148
LVC108	1	A	4	2020-11-04	2022-08-10	2	0.483757
LVC108	1	A	5	2020-11-04	2022-08-10	2	0.148871
LVC108	1	B	1	2020-11-04	2022-08-10	2	0.429783
LVC108	1	B	2	2020-11-04	2022-08-10	2	0.701345
LVC108	1	B	3	2020-11-04	2022-08-10	2	0.346384
LVC108	1	B	4	2020-11-04	2022-08-10	2	0.277572
LVC108	1	C	1	2020-11-04	2022-08-10	2	0.324806
LVC108	1	C	2	2020-11-04	2022-08-10	2	0.210041
LVC108	1	C	3	2020-11-04	2022-08-10	2	0.132001
LVC108	1	C	4	2020-11-04	2022-08-10	2	0.767062
LVC108	1	C	5	2020-11-04	2022-08-10	2	0.558518
LVC109	1	A	1	2021-04-22	2022-08-16	2	1.0874
LVC109	1	A	2	2021-04-22	2022-08-16	2	1.02821
LVC109	1	A	3	2021-04-22	2022-08-16	2	0.558972
LVC109	1	A	4	2021-04-22	2022-08-16	2	0.705219
LVC109	1	A	5	2021-04-22	2022-08-16	2	0.75944
LVC109	1	B	1	2021-04-22	2022-08-16	2	0.0545674
LVC109	1	B	2	2021-04-22	2022-08-16	2	0.0161104
LVC109	1	B	3	2021-04-22	2022-08-16	2	0.00207876
LVC109	1	B	4	2021-04-22	2022-08-16	2	0.051672
LVC109	1	B	5	2021-04-22	2022-08-16	2	0.00259845
LVC109	1	C	1	2021-04-22	2022-08-16	2	0.130789
LVC109	1	C	2	2021-04-22	2022-08-16	2	0.102379
LVC109	1	C	3	2021-04-22	2022-08-16	2	0.175929
LVC109	1	C	4	2021-04-22	2022-08-16	2	0.0763944
LVC109	1	C	5	2021-04-22	2022-08-16	2	0.0639218
LVC110	1	A	1	2021-04-14	2022-08-11	2	1.62403
LVC110	1	A	2	2021-04-14	2022-08-11	2	1.06632
LVC110	1	A	3	2021-04-14	2022-08-11	2	1.35938
LVC110	1	A	4	2021-04-14	2022-08-11	2	0.98728
LVC110	1	A	5	2021-04-14	2022-08-11	2	0.718805
LVC110	1	B	1	2021-04-14	2022-08-11	2	1.74928
LVC110	1	B	2	2021-04-14	2022-08-11	2	1.65276
LVC110	1	B	3	2021-04-14	2022-08-11	2	1.30589
LVC110	1	B	4	2021-04-14	2022-08-11	2	1.15046
LVC110	1	B	5	2021-04-14	2022-08-11	2	0.972488
LVC110	1	C	1	2021-04-14	2022-08-11	2	1.70458
LVC110	1	C	2	2021-04-14	2022-08-11	2	2.99913
LVC110	1	C	3	2021-04-14	2022-08-11	2	1.69632
LVC110	1	C	4	2021-04-14	2022-08-11	2	1.20614
LVC110	1	C	5	2021-04-14	2022-08-11	2	1.47609
LVC111	1	A	1	2020-11-05	2022-08-09	2	1.04614
LVC111	1	A	2	2020-11-05	2022-08-09	2	0.690548
LVC111	1	A	3	2020-11-05	2022-08-09	2	0.612194
LVC111	1	A	4	2020-11-05	2022-08-09	2	1.1305
LVC111	1	A	5	2020-11-05	2022-08-09	2	1.42863
LVC111	1	B	2	2020-11-05	2022-08-09	2	0.664312
LVC111	1	B	3	2020-11-05	2022-08-09	2	0.352709
LVC111	1	B	4	2020-11-05	2022-08-09	2	0.645108
LVC111	1	B	5	2020-11-05	2022-08-09	2	0.946726
LVC111	1	C	1	2020-11-05	2022-08-09	2	0.613522
LVC111	1	C	2	2020-11-05	2022-08-09	2	0.516918
LVC111	1	C	3	2020-11-05	2022-08-09	2	0.695939
LVC111	1	C	4	2020-11-05	2022-08-09	2	0.568887
LVC111	1	C	5	2020-11-05	2022-08-09	2	0.643706
LVC115	1	A	1	2020-11-09	2022-08-15	2	1.04977
LVC115	1	A	2	2020-11-09	2022-08-15	2	0.360145
LVC115	1	A	3	2020-11-09	2022-08-15	2	0.2104
LVC115	1	A	4	2020-11-09	2022-08-15	2	0.832023
LVC115	1	A	5	2020-11-09	2022-08-15	2	0.547753
LVC115	1	B	1	2020-11-09	2022-08-15	2	1.24538
LVC115	1	B	2	2020-11-09	2022-08-15	2	0.610036
LVC115	1	B	3	2020-11-09	2022-08-15	2	0.60193
LVC115	1	B	4	2020-11-09	2022-08-15	2	3.01992
LVC115	1	B	5	2020-11-09	2022-08-15	2	0.856795
LVC115	1	C	1	2020-11-09	2022-08-15	2	0.842937
LVC115	1	C	2	2020-11-09	2022-08-15	2	1.02252
LVC115	1	C	3	2020-11-09	2022-08-15	2	1.96391
LVC115	1	C	4	2020-11-09	2022-08-15	2	0.773938
LVC115	1	C	5	2020-11-09	2022-08-15	2	0.458326
LTC104	1	B	1			1	3.99744
LTC104	1	B	2			1	4.52258
LTC104	1	B	3			1	4.55434
LTC104	1	B	4			1	6.01845
LTC104	1	B	5			1	5.91227
LTC105	1	B	1			1	1.47662
LTC105	1	B	2			1	1.02879
LTC105	1	B	3			1	1.02558
LTC105	1	B	4			1	1.38327
LTC105	1	B	5			1	1.53373
LTC106	1	B	1			1	1.49587
LTC106	1	B	2			1	2.17981
LTC106	1	B	3			1	1.63125
LTC106	1	B	4			1	0.659557
LTC106	1	B	5			1	0.278451

## Sheet: total_respiation
site	plot	subplot	date	replicate_id	co2_rtot
LVC104	1	A	2021-01-11	A1	2.20541
LVC104	1	A	2021-01-11	A2	33.5723
LVC104	1	B	2021-01-11	B3	37.6842
LVC104	1	C	2021-01-11	C4	23.2558
LVC104	1	C	2021-01-11	C5	12.1808
LVC105	1	A	2021-01-12	A1	20.5967
LVC105	1	A	2021-01-12	A2	23.246
LVC105	1	B	2021-01-12	B3	21.7763
LVC105	1	C	2021-01-12	C4	5.91193
LVC105	1	C	2021-01-12	C5	15.2165
LVC106	1	A	2021-01-12	A1	22.9792
LVC106	1	A	2021-01-12	A2	14.3259
LVC106	1	B	2021-01-12	B3	22.3239
LVC106	1	C	2021-01-12	C4	25.2615
LVC106	1	C	2021-01-12	C5	35.0283
LVC107	1	A	2021-01-13	A1	64.5674
LVC107	1	A	2021-01-13	A2	16.4482
LVC107	1	B	2021-01-13	B3	27.9213
LVC107	1	C	2021-01-13	C4	30.5954
LVC107	1	C	2021-01-13	C5	19.5748
LVC108	1	A	2021-01-18	A1	11.6668
LVC108	1	A	2021-01-18	A2	18.3526
LVC108	1	B	2021-01-18	B3	16.174
LVC108	1	C	2021-01-18	C4	19.1602
LVC108	1	C	2021-01-18	C5	21.39
LVC109	1	A	2021-01-11	A1	24.0724
LVC109	1	A	2021-01-11	A2	26.9586
LVC109	1	B	2021-01-11	B3	17.1195
LVC109	1	C	2021-01-11	C4	13.6498
LVC109	1	C	2021-01-11	C5	15.273
LVC110	1	A	2021-01-13	A1	24.2862
LVC110	1	A	2021-01-13	A2	27.6591
LVC110	1	B	2021-01-13	B3	19.0274
LVC110	1	C	2021-01-13	C4	27.3565
LVC110	1	C	2021-01-13	C5	11.6849
LVC111	1	A	2021-01-19	A1	1.59925
LVC111	1	A	2021-01-19	A2	2.57966
LVC111	1	B	2021-01-19	B3	5.05841
LVC111	1	C	2021-01-19	C4	2.6997
LVC111	1	C	2021-01-19	C5	7.75759
LVC112	1	A	2021-01-18	A1	19.0389
LVC112	1	A	2021-01-18	A2	12.7384
LVC112	1	B	2021-01-18	B3	25.0764
LVC112	1	C	2021-01-18	C4	16.5261
LVC112	1	C	2021-01-18	C5	27.6856
LVC115	1	A	2021-01-14	A1	17.3014
LVC115	1	A	2021-01-14	A2	27.3224
LVC115	1	B	2021-01-14	B3	13.7389
LVC115	1	C	2021-01-14	C4	5.98492
LVC115	1	C	2021-01-14	C5	15.474
LVC116	1	A	2021-01-20	A1	8.32716
LVC116	1	A	2021-01-20	A2	18.7087
LVC116	1	B	2021-01-20	B3	4.28244
LVC116	1	C	2021-01-20	C4	7.72982
LVC116	1	C	2021-01-20	C5	3.52885
LVC308	1	A	2021-01-21	A1	10.5034
LVC308	1	A	2021-01-21	A2	9.45305
LVC308	1	B	2021-01-21	B3	18.2581
LVC308	1	C	2021-01-21	C4	2.06111
LVC308	1	C	2021-01-21	C5	11.8377
LVC309	1	A	2021-01-20	A1	0.622679
LVC309	1	A	2021-01-20	A2	2.81618
LVC309	1	B	2021-01-20	B3	25.055
LVC309	1	C	2021-01-20	C4	13.3039
LVC309	1	C	2021-01-20	C5	9.66554
LVC311	1	A	2021-01-20	A1	2.93055
LVC311	1	A	2021-01-20	A2	1.9195
LVC311	1	B	2021-01-20	B3	4.72997
LVC311	1	C	2021-01-20	C4	2.73887
LVC311	1	C	2021-01-20	C5	2.51425
LVC312	1	A	2021-01-20	A1	-0.244306
LVC312	1	A	2021-01-20	A2	1.44287
LVC312	1	B	2021-01-20	B3	13.9168
LVC312	1	C	2021-01-20	C4	16.2484
LVC312	1	C	2021-01-20	C5	10.0485
LVC313	1	A	2021-02-02	A1	12.4318
LVC313	1	A	2021-02-02	A2	12.8642
LVC313	1	B	2021-02-02	B3	11.2112
LVC313	1	C	2021-02-02	C4	11.2077
LVC313	1	C	2021-02-02	C5	5.41892
LVC104	1	A	2021-10-11	A1	67.2902
LVC104	1	A	2021-10-11	A2	73.6641
LVC104	1	B	2021-10-11	B3	86.3432
LVC104	1	C	2021-10-11	C4	67.4016
LVC104	1	C	2021-10-11	C5	75.6886
LVC105	1	A	2021-10-12	A1	54.806
LVC105	1	A	2021-10-12	A2	59.9885
LVC105	1	B	2021-10-12	B3	104.738
LVC105	1	C	2021-10-12	C4	69.5295
LVC105	1	C	2021-10-12	C5	63.4412
LVC106	1	A	2021-10-12	A1	72.1142
LVC106	1	A	2021-10-12	A2	52.2951
LVC106	1	B	2021-10-12	B3	93.9283
LVC106	1	C	2021-10-12	C4	128.962
LVC106	1	C	2021-10-12	C5	102.911
LVC107	1	A	2021-10-08	A1	42.5994
LVC107	1	A	2021-10-08	A2	54.8633
LVC107	1	B	2021-10-08	B3	66.2265
LVC107	1	C	2021-10-08	C4	53.4449
LVC107	1	C	2021-10-08	C5	60.1179
LVC108	1	A	2021-10-21	A1	76.2892
LVC108	1	A	2021-10-21	A2	77.2532
LVC108	1	B	2021-10-21	B3	86.527
LVC108	1	C	2021-10-21	C4	85.5924
LVC108	1	C	2021-10-21	C5	107.891
LVC109	1	A	2021-10-11	A1	67.7361
LVC109	1	A	2021-10-11	A2	43.4365
LVC109	1	B	2021-10-11	B3	64.5795
LVC109	1	C	2021-10-11	C4	73.6415
LVC109	1	C	2021-10-11	C5	69.8237
LVC110	1	A	2021-10-08	A1	81.0066
LVC110	1	A	2021-10-08	A2	64.727
LVC110	1	B	2021-10-08	B3	70.1843
LVC110	1	C	2021-10-08	C4	38.4421
LVC110	1	C	2021-10-08	C5	62.7399
LVC111	1	A	2021-10-22	A1	55.0631
LVC111	1	A	2021-10-22	A2	52.4502
LVC111	1	B	2021-10-22	B3	49.1262
LVC111	1	C	2021-10-22	C4	52.4202
LVC111	1	C	2021-10-22	C5	51.015
LVC112	1	A	2021-10-21	A1	87.599
LVC112	1	A	2021-10-21	A2	113.893
LVC112	1	B	2021-10-21	B3	77.2502
LVC112	1	C	2021-10-21	C4	57.9889
LVC112	1	C	2021-10-21	C5	74.7141
LVC115	1	A	2021-10-13	A1	88.6483
LVC115	1	A	2021-10-13	A2	70.3754
LVC115	1	B	2021-10-13	B3	65.925
LVC115	1	C	2021-10-13	C4	64.3201
LVC115	1	C	2021-10-13	C5	73.4256
LVC116	1	A	2021-10-20	A1	37.575
LVC116	1	A	2021-10-20	A2	64.3714
LVC116	1	B	2021-10-20	B3	44.4877
LVC116	1	C	2021-10-20	C4	31.2666
LVC116	1	C	2021-10-20	C5	34.3859
LVC308	1	A	2021-10-25	A1	108.463
LVC308	1	A	2021-10-25	A2	64.3896
LVC308	1	B	2021-10-25	B3	30.166
LVC308	1	C	2021-10-25	C4	44.685
LVC308	1	C	2021-10-25	C5	32.802
LVC309	1	A	2021-10-25	A1	20.9716
LVC309	1	A	2021-10-25	A2	24.5788
LVC309	1	B	2021-10-25	B3	67.4017
LVC309	1	C	2021-10-25	C4	68.9018
LVC309	1	C	2021-10-25	C5	30.0439
LVC311	1	A	2021-10-25	A1	20.3587
LVC311	1	A	2021-10-25	A2	25.8344
LVC311	1	B	2021-10-25	B3	34.5581
LVC311	1	C	2021-10-25	C4	130.379
LVC311	1	C	2021-10-25	C5	111.387
LVC312	1	A	2021-10-22	A1	51.2889
LVC312	1	A	2021-10-22	A2	26.1422
LVC312	1	B	2021-10-22	B3	59.253
LVC312	1	C	2021-10-22	C4	29.5592
LVC312	1	C	2021-10-22	C5	28.9854
LVC313	1	A	2021-10-20	A1	37.9945
LVC313	1	A	2021-10-20	A2	56.3099
LVC313	1	B	2021-10-20	B3	46.1958
LVC313	1	C	2021-10-20	C4	39.0191
LVC313	1	C	2021-10-20	C5	53.8895
LVC104	1	A	2021-11-08	A1	86.0165
LVC104	1	A	2021-11-08	A2	72.458
LVC104	1	B	2021-11-08	B3	105.057
LVC104	1	C	2021-11-08	C4	61.3505
LVC104	1	C	2021-11-08	C5	97.494
LVC105	1	A	2021-11-10	A1	58.7641
LVC105	1	A	2021-11-10	A2	53.0922
LVC105	1	B	2021-11-10	B3	63.5987
LVC105	1	C	2021-11-10	C4	39.1183
LVC105	1	C	2021-11-10	C5	48.7494
LVC106	1	A	2021-11-10	A1	38.122
LVC106	1	A	2021-11-10	A2	38.3853
LVC106	1	B	2021-11-10	B3	62.3974
LVC106	1	C	2021-11-10	C4	58.5453
LVC106	1	C	2021-11-10	C5	65.8884
LVC107	1	A	2021-11-09	A1	36.1687
LVC107	1	A	2021-11-09	A2	35.3202
LVC107	1	B	2021-11-09	B3	61.1984
LVC107	1	C	2021-11-09	C4	69.5433
LVC107	1	C	2021-11-09	C5	65.7537
LVC108	1	A	2021-11-25	A1	27.3954
LVC108	1	A	2021-11-25	A2	33.6949
LVC108	1	B	2021-11-25	B3	27.5473
LVC108	1	C	2021-11-25	C4	27.8784
LVC108	1	C	2021-11-25	C5	42.767
LVC109	1	A	2021-11-08	A1	69.17
LVC109	1	A	2021-11-08	A2	38.9246
LVC109	1	B	2021-11-08	B3	51.8273
LVC109	1	C	2021-11-08	C4	62.479
LVC109	1	C	2021-11-08	C5	55.59
LVC110	1	A	2021-11-09	A1	52.4223
LVC110	1	A	2021-11-09	A2	70.4929
LVC110	1	B	2021-11-09	B3	45.9613
LVC110	1	C	2021-11-09	C4	41.3323
LVC110	1	C	2021-11-09	C5	51.6444
LVC111	1	A	2021-11-24	A1	17.8046
LVC111	1	A	2021-11-24	A2	15.8449
LVC111	1	B	2021-11-24	B3	17.9712
LVC111	1	C	2021-11-24	C4	8.60398
LVC111	1	C	2021-11-24	C5	19.7806
LVC112	1	A	2021-11-25	A1	45.0598
LVC112	1	A	2021-11-25	A2	46.4185
LVC112	1	B	2021-11-25	B3	26.0854
LVC112	1	C	2021-11-25	C4	29.4949
LVC112	1	C	2021-11-25	C5	34.8501
LVC115	1	A	2021-11-11	A1	62.153
LVC115	1	A	2021-11-11	A2	37.6364
LVC115	1	B	2021-11-11	B3	58.6927
LVC115	1	C	2021-11-11	C4	52.8638
LVC115	1	C	2021-11-11	C5	50.2269
LVC116	1	A	2021-11-23	A1	20.0619
LVC116	1	A	2021-11-23	A2	27.5819
LVC116	1	B	2021-11-23	B3	19.5548
LVC116	1	C	2021-11-23	C4	28.3208
LVC116	1	C	2021-11-23	C5	21.0842
LVC308	1	A	2021-11-22	A1	52.417
LVC308	1	A	2021-11-22	A2	43.779
LVC308	1	B	2021-11-22	B3	40.3128
LVC308	1	C	2021-11-22	C4	34.5218
LVC308	1	C	2021-11-22	C5	56.7551
LVC309	1	A	2021-11-22	A1	20.8539
LVC309	1	A	2021-11-22	A2	12.8748
LVC309	1	B	2021-11-22	B3	37.4728
LVC309	1	C	2021-11-22	C4	18.5714
LVC309	1	C	2021-11-22	C5	10.9567
LVC311	1	A	2021-11-22	A1	3.4217
LVC311	1	A	2021-11-22	A2	8.61673
LVC311	1	B	2021-11-22	B3	33.5056
LVC311	1	C	2021-11-22	C4	103.327
LVC311	1	C	2021-11-22	C5	89.3773
LVC312	1	A	2021-11-23	A1	6.95753
LVC312	1	A	2021-11-23	A2	11.3676
LVC312	1	B	2021-11-23	B3	14.9945
LVC312	1	C	2021-11-23	C4	15.3352
LVC312	1	C	2021-11-23	C5	29.7631
LVC313	1	A	2021-11-23	A1	23.3051
LVC313	1	A	2021-11-23	A2	52.2444
LVC313	1	B	2021-11-23	B3	65.6024
LVC313	1	C	2021-11-23	C4	29.1374
LVC313	1	C	2021-11-23	C5	49.0765
LVC104	1	A	2021-12-06	A1	44.3257
LVC104	1	A	2021-12-06	A2	38.8336
LVC104	1	B	2021-12-06	B3	46.324
LVC104	1	C	2021-12-06	C4	22.3325
LVC104	1	C	2021-12-06	C5	12.3276
LVC105	1	A	2021-12-08	A1	26.854
LVC105	1	A	2021-12-08	A2	22.033
LVC105	1	B	2021-12-08	B3	26.7803
LVC105	1	C	2021-12-08	C4	20.258
LVC105	1	C	2021-12-08	C5	15.7231
LVC106	1	A	2021-12-08	A1	12.1013
LVC106	1	A	2021-12-08	A2	13.1811
LVC106	1	B	2021-12-08	B3	41.4847
LVC106	1	C	2021-12-08	C4	17.1014
LVC106	1	C	2021-12-08	C5	17.0303
LVC107	1	A	2021-12-07	A1	16.5003
LVC107	1	A	2021-12-07	A2	16.6544
LVC107	1	B	2021-12-07	B3	16.7293
LVC107	1	C	2021-12-07	C4	17.5626
LVC107	1	C	2021-12-07	C5	13.6011
LVC108	1	A	2021-12-16	A1	15.9662
LVC108	1	A	2021-12-16	A2	3.53474
LVC108	1	B	2021-12-16	B3	13.8971
LVC108	1	C	2021-12-16	C4	1.67466
LVC108	1	C	2021-12-16	C5	10.7226
LVC109	1	A	2021-12-06	A1	9.70986
LVC109	1	A	2021-12-06	A2	9.42654
LVC109	1	B	2021-12-06	B3	4.48968
LVC109	1	C	2021-12-06	C4	13.3449
LVC109	1	C	2021-12-06	C5	24.6331
LVC110	1	A	2021-12-07	A1	16.1209
LVC110	1	A	2021-12-07	A2	17.3112
LVC110	1	B	2021-12-07	B3	14.5184
LVC110	1	C	2021-12-07	C4	11.8491
LVC110	1	C	2021-12-07	C5	24.15
LVC111	1	A	2021-12-16	A1	27.6427
LVC111	1	A	2021-12-16	A2	5.40647
LVC111	1	B	2021-12-16	B3	7.21773
LVC111	1	C	2021-12-16	C4	0.641688
LVC111	1	C	2021-12-16	C5	6.4409
LVC112	1	A	2021-12-16	A1	1.55893
LVC112	1	A	2021-12-16	A2	13.7873
LVC112	1	B	2021-12-16	B3	9.49044
LVC112	1	C	2021-12-16	C4	12.1327
LVC112	1	C	2021-12-16	C5	7.97497
LVC115	1	A	2021-12-08	A1	31.5461
LVC115	1	A	2021-12-08	A2	28.3343
LVC115	1	B	2021-12-08	B3	4.84616
LVC115	1	C	2021-12-08	C4	15.7245
LVC115	1	C	2021-12-08	C5	15.3655
LVC116	1	A	2021-12-17	A1	5.18613
LVC116	1	A	2021-12-17	A2	12.6792
LVC116	1	B	2021-12-17	B3	44.6484
LVC116	1	C	2021-12-17	C4	40.4363
LVC116	1	C	2021-12-17	C5	33.6964
LVC308	1	A	2021-12-15	A1	24.5209
LVC308	1	A	2021-12-15	A2	20.1253
LVC308	1	B	2021-12-15	B3	23.9495
LVC308	1	C	2021-12-15	C4	11.7094
LVC308	1	C	2021-12-15	C5	12.6776
LVC309	1	A	2021-12-15	A1	0.473206
LVC309	1	A	2021-12-15	A2	5.81092
LVC309	1	B	2021-12-15	B3	6.66689
LVC309	1	C	2021-12-15	C4	0.483071
LVC309	1	C	2021-12-15	C5	9.84638
LVC311	1	A	2021-12-15	A1	33.4827
LVC311	1	A	2021-12-15	A2	26.7278
LVC311	1	B	2021-12-15	B3	12.5158
LVC311	1	C	2021-12-15	C4	25.5436
LVC311	1	C	2021-12-15	C5	10.8579
LVC312	1	A	2021-12-15	A1	4.71911
LVC312	1	A	2021-12-15	A2	9.90509
LVC312	1	B	2021-12-15	B3	10.1867
LVC312	1	C	2021-12-15	C4	16.0349
LVC312	1	C	2021-12-15	C5	5.74208
LVC104	1	A	2021-02-04	A1	8.98986
LVC104	1	A	2021-02-04	A2	14.2875
LVC104	1	B	2021-02-04	B3	15.1155
LVC104	1	C	2021-02-04	C4	26.1047
LVC104	1	C	2021-02-04	C5	14.9728
LVC105	1	A	2021-02-09	A1	24.8025
LVC105	1	A	2021-02-09	A2	16.3658
LVC105	1	B	2021-02-09	B3	17.531
LVC105	1	C	2021-02-09	C4	13.2376
LVC105	1	C	2021-02-09	C5	7.87877
LVC106	1	A	2021-02-09	A1	9.71466
LVC106	1	A	2021-02-09	A2	15.2267
LVC106	1	B	2021-02-09	B3	15.2433
LVC106	1	C	2021-02-09	C4	15.2601
LVC106	1	C	2021-02-09	C5	11.9368
LVC107	1	A	2021-02-08	A1	15.0851
LVC107	1	A	2021-02-08	A2	12.9631
LVC107	1	B	2021-02-08	B3	9.21542
LVC107	1	C	2021-02-08	C4	14.9138
LVC107	1	C	2021-02-08	C5	18.0881
LVC108	1	A	2021-02-17	A1	0.640236
LVC108	1	A	2021-02-17	A2	3.41988
LVC108	1	B	2021-02-17	B3	11.3309
LVC108	1	C	2021-02-17	C4	8.17028
LVC108	1	C	2021-02-17	C5	23.057
LVC109	1	A	2021-02-10	A1	17.0087
LVC109	1	A	2021-02-10	A2	11.1819
LVC109	1	B	2021-02-10	B3	12.1171
LVC109	1	C	2021-02-10	C4	5.00892
LVC109	1	C	2021-02-10	C5	4.08203
LVC110	1	A	2021-02-08	A1	8.4954
LVC110	1	A	2021-02-08	A2	9.8344
LVC110	1	B	2021-02-08	B3	17.7634
LVC110	1	C	2021-02-08	C4	10.1675
LVC110	1	C	2021-02-08	C5	4.12307
LVC111	1	A	2021-02-16	A1	2.61345
LVC111	1	A	2021-02-16	A2	5.75833
LVC111	1	B	2021-02-16	B3	1.42851
LVC111	1	C	2021-02-16	C4	1.94035
LVC111	1	C	2021-02-16	C5	0.557182
LVC112	1	A	2021-02-17	A1	9.0594
LVC112	1	A	2021-02-17	A2	5.56476
LVC112	1	B	2021-02-17	B3	15.1414
LVC112	1	C	2021-02-17	C4	6.94284
LVC112	1	C	2021-02-17	C5	5.73562
LVC115	1	A	2021-02-10	A1	1.53786
LVC115	1	A	2021-02-10	A2	5.87527
LVC115	1	B	2021-02-10	B3	8.30603
LVC115	1	C	2021-02-10	C4	8.22609
LVC115	1	C	2021-02-10	C5	10.1432
LVC116	1	A	2021-02-22	A1	11.611
LVC116	1	A	2021-02-22	A2	1.37709
LVC116	1	B	2021-02-22	B3	11.0246
LVC116	1	C	2021-02-22	C4	12.989
LVC116	1	C	2021-02-22	C5	4.51034
LVC308	1	A	2021-02-16	A1	4.02713
LVC308	1	A	2021-02-16	A2	10.2967
LVC308	1	B	2021-02-16	B3	10.6853
LVC308	1	C	2021-02-16	C4	3.12198
LVC308	1	C	2021-02-16	C5	4.28663
LVC309	1	A	2021-02-15	A1	2.10136
LVC309	1	A	2021-02-15	A2	9.00455
LVC309	1	B	2021-02-15	B3	16.9334
LVC309	1	C	2021-02-15	C4	3.01481
LVC309	1	C	2021-02-15	C5	8.94647
LVC311	1	A	2021-02-15	A1	11.9324
LVC311	1	A	2021-02-15	A2	13.4858
LVC311	1	B	2021-02-15	B3	6.20782
LVC311	1	C	2021-02-15	C4	11.3791
LVC311	1	C	2021-02-15	C5	11.5613
LVC312	1	A	2021-02-16	A1	0.29647
LVC312	1	A	2021-02-16	A2	0.925386
LVC312	1	B	2021-02-16	B3	5.11494
LVC312	1	C	2021-02-16	C4	5.53326
LVC312	1	C	2021-02-16	C5	6.95854
LVC313	1	A	2021-02-22	A1	3.35664
LVC313	1	A	2021-02-22	A2	11.4881
LVC313	1	B	2021-02-22	B3	8.30183
LVC313	1	C	2021-02-22	C4	23.1217
LVC313	1	C	2021-02-22	C5	17.2489
LVC104	1	A	2021-03-08	A1	20.8658
LVC104	1	A	2021-03-08	A2	16.4997
LVC104	1	B	2021-03-08	B3	21.2416
LVC104	1	C	2021-03-08	C4	46.4137
LVC104	1	C	2021-03-08	C5	18.1554
LVC105	1	A	2021-03-10	A1	10.7629
LVC105	1	A	2021-03-10	A2	24.3289
LVC105	1	B	2021-03-10	B3	19.3045
LVC105	1	C	2021-03-10	C4	23.4703
LVC105	1	C	2021-03-10	C5	12.3899
LVC106	1	A	2021-03-10	A1	15.1574
LVC106	1	A	2021-03-10	A2	14.1778
LVC106	1	B	2021-03-10	B3	20.486
LVC106	1	C	2021-03-10	C4	15.527
LVC106	1	C	2021-03-10	C5	22.48
LVC107	1	A	2021-03-09	A1	33.0987
LVC107	1	A	2021-03-09	A2	25.422
LVC107	1	B	2021-03-09	B3	34.6145
LVC107	1	C	2021-03-09	C4	14.775
LVC107	1	C	2021-03-09	C5	19.1016
LVC108	1	A	2021-03-18	A1	9.25746
LVC108	1	A	2021-03-18	A2	7.95455
LVC108	1	B	2021-03-18	B3	16.9234
LVC108	1	C	2021-03-18	C4	16.4975
LVC108	1	C	2021-03-18	C5	14.0125
LVC109	1	A	2021-03-08	A1	0.605045
LVC109	1	A	2021-03-08	A2	2.90562
LVC109	1	B	2021-03-08	B3	13.2924
LVC109	1	C	2021-03-08	C4	6.1433
LVC109	1	C	2021-03-08	C5	9.22686
LVC110	1	A	2021-03-09	A1	26.6039
LVC110	1	A	2021-03-09	A2	22.9448
LVC110	1	B	2021-03-09	B3	16.753
LVC110	1	C	2021-03-09	C4	25.5051
LVC110	1	C	2021-03-09	C5	32.5557
LVC111	1	A	2021-03-16	A1	36.3096
LVC111	1	A	2021-03-16	A2	4.86125
LVC111	1	B	2021-03-16	B3	1.77734
LVC111	1	C	2021-03-16	C4	1.90974
LVC111	1	C	2021-03-16	C5	2.41434
LVC112	1	A	2021-03-18	A1	7.38613
LVC112	1	A	2021-03-18	A2	13.9528
LVC112	1	B	2021-03-18	B3	6.23302
LVC112	1	C	2021-03-18	C4	7.17603
LVC112	1	C	2021-03-18	C5	5.35805
LVC115	1	A	2021-03-11	A1	10.7669
LVC115	1	A	2021-03-11	A2	14.6619
LVC115	1	B	2021-03-11	B3	14.9864
LVC115	1	C	2021-03-11	C4	6.47196
LVC115	1	C	2021-03-11	C5	9.10842
LVC116	1	A	2021-03-19	A1	5.44537
LVC116	1	A	2021-03-19	A2	0.0978499
LVC116	1	B	2021-03-19	B3	2.88379
LVC116	1	C	2021-03-19	C4	16.7294
LVC116	1	C	2021-03-19	C5	12.4654
LVC308	1	A	2021-03-17	A1	29.2629
LVC308	1	A	2021-03-17	A2	29.803
LVC308	1	B	2021-03-17	B3	32.6429
LVC308	1	C	2021-03-17	C4	19.5453
LVC308	1	C	2021-03-17	C5	10.4684
LVC309	1	A	2021-03-16	A1	5.50482
LVC309	1	A	2021-03-16	A2	8.26059
LVC309	1	B	2021-03-16	B3	3.91297
LVC309	1	C	2021-03-16	C4	8.24375
LVC309	1	C	2021-03-16	C5	13.7657
LVC311	1	A	2021-03-16	A1	16.4388
LVC311	1	A	2021-03-16	A2	9.15065
LVC311	1	B	2021-03-16	B3	0.818314
LVC311	1	C	2021-03-16	C4	17.3436
LVC311	1	C	2021-03-16	C5	1.21416
LVC312	1	A	2021-03-17	A1	8.91081
LVC312	1	A	2021-03-17	A2	7.5239
LVC312	1	B	2021-03-17	B3	4.24563
LVC312	1	C	2021-03-17	C4	2.36505
LVC312	1	C	2021-03-17	C5	7.50836
LVC313	1	A	2021-03-19	A1	5.78748
LVC313	1	A	2021-03-19	A2	12.2853
LVC313	1	B	2021-03-19	B3	11.0245
LVC313	1	C	2021-03-19	C4	6.60325
LVC313	1	C	2021-03-19	C5	5.03007
LVC104	1	A	2021-04-07	A1	26.2676
LVC104	1	A	2021-04-07	A2	29.1897
LVC104	1	B	2021-04-07	B3	34.6656
LVC104	1	C	2021-04-07	C4	55.9343
LVC104	1	C	2021-04-07	C5	37.0006
LVC105	1	A	2021-04-09	A1	36.4074
LVC105	1	A	2021-04-09	A2	18.199
LVC105	1	B	2021-04-09	B3	32.7815
LVC105	1	C	2021-04-09	C4	20.7332
LVC105	1	C	2021-04-09	C5	16.5853
LVC106	1	A	2021-04-09	A1	35.5505
LVC106	1	A	2021-04-09	A2	21.6082
LVC106	1	B	2021-04-09	B3	42.7767
LVC106	1	C	2021-04-09	C4	30.0585
LVC106	1	C	2021-04-09	C5	26.9238
LVC107	1	A	2021-04-08	A1	38.6904
LVC107	1	A	2021-04-08	A2	25.1534
LVC107	1	B	2021-04-08	B3	23.2094
LVC107	1	C	2021-04-08	C4	32.1837
LVC107	1	C	2021-04-08	C5	35.4414
LVC108	1	A	2021-04-20	A1	45.0684
LVC108	1	A	2021-04-20	A2	43.7622
LVC108	1	B	2021-04-20	B3	89.6345
LVC108	1	C	2021-04-20	C4	83.5403
LVC108	1	C	2021-04-20	C5	113.959
LVC109	1	A	2021-04-07	A1	20.6171
LVC109	1	A	2021-04-07	A2	19.0652
LVC109	1	B	2021-04-07	B3	20.7663
LVC109	1	C	2021-04-07	C4	19.6337
LVC109	1	C	2021-04-07	C5	24.778
LVC110	1	A	2021-04-08	A1	26.4115
LVC110	1	A	2021-04-08	A2	42.3033
LVC110	1	B	2021-04-08	B3	44.1677
LVC110	1	C	2021-04-08	C4	28.199
LVC110	1	C	2021-04-08	C5	39.8658
LVC111	1	A	2021-04-20	A1	58.8631
LVC111	1	A	2021-04-20	A2	44.7152
LVC111	1	B	2021-04-20	B3	33.7427
LVC111	1	C	2021-04-20	C4	27.9988
LVC111	1	C	2021-04-20	C5	72.9354
LVC112	1	A	2021-04-21	A1	56.2765
LVC112	1	A	2021-04-21	A2	66.4855
LVC112	1	B	2021-04-21	B3	75.323
LVC112	1	C	2021-04-21	C4	57.8741
LVC112	1	C	2021-04-21	C5	32.7602
LVC115	1	A	2021-04-12	A1	36.3555
LVC115	1	A	2021-04-12	A2	29.2017
LVC115	1	B	2021-04-12	B3	39.9543
LVC115	1	C	2021-04-12	C4	52.1369
LVC115	1	C	2021-04-12	C5	37.8254
LVC116	1	A	2021-04-22	A1	26.7251
LVC116	1	A	2021-04-22	A2	37.5723
LVC116	1	B	2021-04-22	B3	18.9521
LVC116	1	C	2021-04-22	C4	28.061
LVC116	1	C	2021-04-22	C5	37.7318
LVC308	1	A	2021-04-16	A1	47.0715
LVC308	1	A	2021-04-16	A2	37.0564
LVC308	1	B	2021-04-16	B3	23.1012
LVC308	1	C	2021-04-16	C4	58.8073
LVC308	1	C	2021-04-16	C5	30.214
LVC309	1	A	2021-04-15	A1	0.506704
LVC309	1	A	2021-04-15	A2	1.64574
LVC309	1	B	2021-04-15	B3	31.8397
LVC309	1	C	2021-04-15	C4	24.4429
LVC309	1	C	2021-04-15	C5	9.60313
LVC311	1	A	2021-04-15	A1	17.4644
LVC311	1	A	2021-04-15	A2	35.5837
LVC311	1	B	2021-04-15	B3	28.3734
LVC311	1	C	2021-04-15	C4	31.0663
LVC311	1	C	2021-04-15	C5	22.093
LVC312	1	A	2021-04-16	A1	30.8683
LVC312	1	A	2021-04-16	A2	17.7875
LVC312	1	B	2021-04-16	B3	24.8579
LVC312	1	C	2021-04-16	C4	32.8918
LVC312	1	C	2021-04-16	C5	19.0308
LVC313	1	A	2021-04-22	A1	36.3144
LVC313	1	A	2021-04-22	A2	28.0704
LVC313	1	B	2021-04-22	B3	33.3373
LVC313	1	C	2021-04-22	C4	25.6874
LVC313	1	C	2021-04-22	C5	44.6798
LVC104	1	A	2021-05-10	A1	79.2624
LVC104	1	A	2021-05-10	A2	54.8153
LVC104	1	B	2021-05-10	B3	46.4281
LVC104	1	C	2021-05-10	C4	33.7556
LVC104	1	C	2021-05-10	C5	62.3563
LVC105	1	A	2021-05-13	A1	110.887
LVC105	1	A	2021-05-13	A2	78.1953
LVC105	1	B	2021-05-13	B3	112.237
LVC105	1	C	2021-05-13	C4	91.79
LVC105	1	C	2021-05-13	C5	90.1114
LVC106	1	A	2021-05-13	A1	90.1076
LVC106	1	A	2021-05-13	A2	79.0144
LVC106	1	B	2021-05-13	B3	119.272
LVC106	1	C	2021-05-13	C4	103.684
LVC106	1	C	2021-05-13	C5	90.3208
LVC107	1	A	2021-05-11	A1	80.4052
LVC107	1	A	2021-05-11	A2	65.1128
LVC107	1	B	2021-05-11	B3	60.856
LVC107	1	C	2021-05-11	C4	59.4982
LVC107	1	C	2021-05-11	C5	59.5706
LVC108	1	A	2021-05-20	A1	35.6497
LVC108	1	A	2021-05-20	A2	25.817
LVC108	1	B	2021-05-20	B3	56.9787
LVC108	1	C	2021-05-20	C4	88.0653
LVC108	1	C	2021-05-20	C5	106.938
LVC109	1	A	2021-05-10	A1	243.934
LVC109	1	A	2021-05-10	A2	146.68
LVC109	1	B	2021-05-10	B3	122.181
LVC109	1	C	2021-05-10	C4	90.193
LVC109	1	C	2021-05-10	C5	139.139
LVC110	1	A	2021-05-11	A1	68.2366
LVC110	1	A	2021-05-11	A2	75.6712
LVC110	1	B	2021-05-11	B3	71.3357
LVC110	1	C	2021-05-11	C4	64.2571
LVC110	1	C	2021-05-11	C5	75.9712
LVC111	1	A	2021-05-19	A1	52.0565
LVC111	1	A	2021-05-19	A2	35.7321
LVC111	1	B	2021-05-19	B3	21.2038
LVC111	1	C	2021-05-19	C4	40.8233
LVC111	1	C	2021-05-19	C5	86.4692
LVC112	1	A	2021-05-20	A1	59.828
LVC112	1	A	2021-05-20	A2	72.6966
LVC112	1	B	2021-05-20	B3	82.6167
LVC112	1	C	2021-05-20	C4	40.1695
LVC112	1	C	2021-05-20	C5	88.9761
LVC115	1	A	2021-05-14	A1	131.24
LVC115	1	A	2021-05-14	A2	147.385
LVC115	1	B	2021-05-14	B3	111.322
LVC115	1	C	2021-05-14	C4	94.0389
LVC115	1	C	2021-05-14	C5	103.924
LVC116	1	A	2021-05-21	A1	80.7578
LVC116	1	A	2021-05-21	A2	23.6061
LVC116	1	B	2021-05-21	B3	65.0017
LVC116	1	C	2021-05-21	C4	44.5029
LVC116	1	C	2021-05-21	C5	54.1741
LVC308	1	A	2021-05-19	A1	96.2393
LVC308	1	A	2021-05-19	A2	106.187
LVC308	1	B	2021-05-19	B3	83.0138
LVC308	1	C	2021-05-19	C4	89.6382
LVC308	1	C	2021-05-19	C5	56.3687
LVC309	1	A	2021-05-17	A1	25.6021
LVC309	1	A	2021-05-17	A2	48.0361
LVC309	1	B	2021-05-17	B3	78.5194
LVC309	1	C	2021-05-17	C4	57.8019
LVC309	1	C	2021-05-17	C5	38.4864
LVC311	1	A	2021-05-17	A1	50.5829
LVC311	1	A	2021-05-17	A2	65.4461
LVC311	1	B	2021-05-17	B3	63.7171
LVC311	1	C	2021-05-17	C4	55.1324
LVC311	1	C	2021-05-17	C5	50.7524
LVC312	1	A	2021-05-19	A1	22.6607
LVC312	1	A	2021-05-19	A2	61.7073
LVC312	1	B	2021-05-19	B3	76.6004
LVC312	1	C	2021-05-19	C4	43.8496
LVC312	1	C	2021-05-19	C5	54.5152
LVC313	1	A	2021-05-21	A1	46.6281
LVC313	1	A	2021-05-21	A2	52.1119
LVC313	1	B	2021-05-21	B3	50.5447
LVC313	1	C	2021-05-21	C4	63.6654
LVC313	1	C	2021-05-21	C5	56.7435
LVC104	1	A	2021-06-07	A1	147.18
LVC104	1	A	2021-06-07	A2	88.4166
LVC104	1	B	2021-06-07	B3	113.327
LVC104	1	C	2021-06-07	C4	95.8982
LVC104	1	C	2021-06-07	C5	129.887
LVC105	1	A	2021-06-09	A1	188.037
LVC105	1	A	2021-06-09	A2	146.981
LVC105	1	B	2021-06-09	B3	198.247
LVC105	1	C	2021-06-09	C4	246.794
LVC105	1	C	2021-06-09	C5	184.406
LVC106	1	A	2021-06-09	A1	184.068
LVC106	1	A	2021-06-09	A2	317.34
LVC106	1	B	2021-06-09	B3	247.378
LVC106	1	C	2021-06-09	C4	183.637
LVC106	1	C	2021-06-09	C5	209.416
LVC107	1	A	2021-06-08	A1	105.103
LVC107	1	A	2021-06-08	A2	72.8729
LVC107	1	B	2021-06-08	B3	84.5035
LVC107	1	C	2021-06-08	C4	88.7609
LVC107	1	C	2021-06-08	C5	76.6803
LVC108	1	A	2021-06-17	A1	315.102
LVC108	1	A	2021-06-17	A2	123.378
LVC108	1	B	2021-06-17	B3	157.242
LVC108	1	C	2021-06-17	C4	298.808
LVC108	1	C	2021-06-17	C5	289.095
LVC109	1	A	2021-06-07	A1	352.673
LVC109	1	A	2021-06-07	A2	222.434
LVC109	1	B	2021-06-07	B3	204.784
LVC109	1	C	2021-06-07	C4	112.571
LVC109	1	C	2021-06-07	C5	206.264
LVC110	1	A	2021-06-08	A1	62.9606
LVC110	1	A	2021-06-08	A2	70.9693
LVC110	1	B	2021-06-08	B3	165.86
LVC110	1	C	2021-06-08	C4	78.3938
LVC110	1	C	2021-06-08	C5	63.8122
LVC111	1	A	2021-06-17	A1	98.5598
LVC111	1	A	2021-06-17	A2	73.2902
LVC111	1	B	2021-06-17	B3	69.96
LVC111	1	C	2021-06-17	C4	118.953
LVC111	1	C	2021-06-17	C5	113.889
LVC112	1	A	2021-06-18	A1	146.362
LVC112	1	A	2021-06-18	A2	180.153
LVC112	1	B	2021-06-18	B3	132.278
LVC112	1	C	2021-06-18	C4	108.968
LVC112	1	C	2021-06-18	C5	125.625
LVC115	1	A	2021-06-14	A1	99.8556
LVC115	1	A	2021-06-14	A2	119.812
LVC115	1	B	2021-06-14	B3	142.225
LVC115	1	C	2021-06-14	C4	132.388
LVC115	1	C	2021-06-14	C5	86.816
LVC116	1	A	2021-06-19	A1	108.705
LVC116	1	A	2021-06-19	A2	103.184
LVC116	1	B	2021-06-19	B3	119.623
LVC116	1	C	2021-06-19	C4	114.488
LVC116	1	C	2021-06-19	C5	139.099
LVC308	1	A	2021-06-15	A1	136.428
LVC308	1	A	2021-06-15	A2	196.707
LVC308	1	B	2021-06-15	B3	91.7469
LVC308	1	C	2021-06-15	C4	95.8781
LVC308	1	C	2021-06-15	C5	62.4948
LVC309	1	A	2021-06-16	A1	82.5024
LVC309	1	A	2021-06-16	A2	50.1907
LVC309	1	B	2021-06-16	B3	98.1085
LVC309	1	C	2021-06-16	C4	118.586
LVC309	1	C	2021-06-16	C5	50.3082
LVC311	1	A	2021-06-16	A1	62.5544
LVC311	1	A	2021-06-16	A2	99.1571
LVC311	1	B	2021-06-16	B3	99.913
LVC311	1	C	2021-06-16	C4	72.3434
LVC311	1	C	2021-06-16	C5	86.6198
LVC312	1	A	2021-06-16	A1	71.0686
LVC312	1	A	2021-06-16	A2	81.1355
LVC312	1	B	2021-06-16	B3	114.696
LVC312	1	C	2021-06-16	C4	100.869
LVC312	1	C	2021-06-16	C5	83.9259
LVC313	1	A	2021-06-19	A1	117.127
LVC313	1	A	2021-06-19	A2	98.8598
LVC313	1	B	2021-06-19	B3	115.032
LVC313	1	C	2021-06-19	C4	90.5168
LVC313	1	C	2021-06-19	C5	112.571
LVC104	1	A	2021-07-08	A1	181.271
LVC104	1	A	2021-07-08	A2	163.523
LVC104	1	B	2021-07-08	B3	126.297
LVC104	1	C	2021-07-08	C4	117.63
LVC104	1	C	2021-07-08	C5	154.302
LVC105	1	A	2021-07-13	A1	197.268
LVC105	1	A	2021-07-13	A2	289.865
LVC105	1	B	2021-07-13	B3	437.089
LVC105	1	C	2021-07-13	C4	257.986
LVC105	1	C	2021-07-13	C5	705.132
LVC106	1	A	2021-07-13	A1	453.908
LVC106	1	A	2021-07-13	A2	297.658
LVC106	1	B	2021-07-13	B3	593.307
LVC106	1	C	2021-07-13	C4	341.633
LVC106	1	C	2021-07-13	C5	226.932
LVC107	1	A	2021-07-09	A1	110.948
LVC107	1	A	2021-07-09	A2	121.044
LVC107	1	B	2021-07-09	B3	76.4088
LVC107	1	C	2021-07-09	C4	105.281
LVC107	1	C	2021-07-09	C5	108.494
LVC108	1	A	2021-07-20	A1	216.192
LVC108	1	A	2021-07-20	A2	91.4054
LVC108	1	B	2021-07-20	B3	129.561
LVC108	1	C	2021-07-20	C4	165.988
LVC108	1	C	2021-07-20	C5	186.686
LVC109	1	A	2021-07-08	A1	215.948
LVC109	1	A	2021-07-08	A2	236.01
LVC109	1	B	2021-07-08	B3	229.693
LVC109	1	C	2021-07-08	C4	199.847
LVC109	1	C	2021-07-08	C5	381.341
LVC110	1	A	2021-07-09	A1	108.499
LVC110	1	A	2021-07-09	A2	133.672
LVC110	1	B	2021-07-09	B3	178.274
LVC110	1	C	2021-07-09	C4	116.152
LVC110	1	C	2021-07-09	C5	149.16
LVC111	1	A	2021-07-20	A1	240.286
LVC111	1	A	2021-07-20	A2	193.435
LVC111	1	B	2021-07-20	B3	204.319
LVC111	1	C	2021-07-20	C4	259.03
LVC111	1	C	2021-07-20	C5	265.644
LVC112	1	A	2021-07-20	A1	146.219
LVC112	1	A	2021-07-20	A2	181.213
LVC112	1	B	2021-07-20	B3	97.7245
LVC112	1	C	2021-07-20	C4	117.92
LVC112	1	C	2021-07-20	C5	215.774
LVC115	1	A	2021-07-15	A1	141.473
LVC115	1	A	2021-07-15	A2	186.447
LVC115	1	B	2021-07-15	B3	155.471
LVC115	1	C	2021-07-15	C4	133.319
LVC115	1	C	2021-07-15	C5	121.138
LVC116	1	A	2021-07-22	A1	93.8019
LVC116	1	A	2021-07-22	A2	120.529
LVC116	1	B	2021-07-22	B3	68.5887
LVC116	1	C	2021-07-22	C4	150.741
LVC116	1	C	2021-07-22	C5	88.0844
LVC308	1	A	2021-07-19	A1	194.686
LVC308	1	A	2021-07-19	A2	181.946
LVC308	1	B	2021-07-19	B3	157.176
LVC308	1	C	2021-07-19	C4	153.014
LVC308	1	C	2021-07-19	C5	143.405
LVC309	1	A	2021-07-16	A1	93.5433
LVC309	1	A	2021-07-16	A2	236.998
LVC309	1	B	2021-07-16	B3	195.183
LVC309	1	C	2021-07-16	C4	157.097
LVC309	1	C	2021-07-16	C5	95.1262
LVC311	1	A	2021-07-16	A1	331.815
LVC311	1	A	2021-07-16	A2	153.248
LVC311	1	B	2021-07-16	B3	147.374
LVC311	1	C	2021-07-16	C4	134.697
LVC311	1	C	2021-07-16	C5	160.401
LVC312	1	A	2021-07-19	A1	236.632
LVC312	1	A	2021-07-19	A2	390.616
LVC312	1	B	2021-07-19	B3	251.18
LVC312	1	C	2021-07-19	C4	189.579
LVC312	1	C	2021-07-19	C5	161.773
LVC313	1	A	2021-07-22	A1	95.1282
LVC313	1	A	2021-07-22	A2	132.906
LVC313	1	B	2021-07-22	B3	56.6538
LVC313	1	C	2021-07-22	C4	70.3047
LVC313	1	C	2021-07-22	C5	107.34
LVC104	1	A	2021-08-09	A1	281.87
LVC104	1	A	2021-08-09	A2	263.579
LVC104	1	B	2021-08-09	B3	163.913
LVC104	1	C	2021-08-09	C4	176.33
LVC104	1	C	2021-08-09	C5	222.505
LVC105	1	A	2021-08-11	A1	144.834
LVC105	1	A	2021-08-11	A2	219.759
LVC105	1	B	2021-08-11	B3	378.074
LVC105	1	C	2021-08-11	C4	443.275
LVC105	1	C	2021-08-11	C5	273.806
LVC106	1	A	2021-08-11	A1	295.986
LVC106	1	A	2021-08-11	A2	294.969
LVC106	1	B	2021-08-11	B3	392.939
LVC106	1	C	2021-08-11	C4	316.689
LVC106	1	C	2021-08-11	C5	493.61
LVC107	1	A	2021-08-10	A1	249.35
LVC107	1	A	2021-08-10	A2	118.726
LVC107	1	B	2021-08-10	B3	130.226
LVC107	1	C	2021-08-10	C4	142.799
LVC107	1	C	2021-08-10	C5	132.358
LVC108	1	A	2021-08-23	A1	146.927
LVC108	1	A	2021-08-23	A2	95.452
LVC108	1	B	2021-08-23	B3	120.904
LVC108	1	C	2021-08-23	C4	205.581
LVC108	1	C	2021-08-23	C5	167.456
LVC109	1	A	2021-08-09	A1	271.291
LVC109	1	A	2021-08-09	A2	275.146
LVC109	1	B	2021-08-09	B3	181.399
LVC109	1	C	2021-08-09	C4	206.885
LVC109	1	C	2021-08-09	C5	173.259
LVC110	1	A	2021-08-10	A1	119.558
LVC110	1	A	2021-08-10	A2	125.041
LVC110	1	B	2021-08-10	B3	161.645
LVC110	1	C	2021-08-10	C4	222.669
LVC110	1	C	2021-08-10	C5	123.015
LVC111	1	A	2021-08-23	A1	171.877
LVC111	1	A	2021-08-23	A2	111.069
LVC111	1	B	2021-08-23	B3	161.729
LVC111	1	C	2021-08-23	C4	112.072
LVC111	1	C	2021-08-23	C5	152.088
LVC112	1	A	2021-08-25	A1	92.8179
LVC112	1	A	2021-08-25	A2	110.788
LVC112	1	B	2021-08-25	B3	76.2205
LVC112	1	C	2021-08-25	C4	146.63
LVC112	1	C	2021-08-25	C5	131.302
LVC115	1	A	2021-08-16	A1	191.817
LVC115	1	A	2021-08-16	A2	237.92
LVC115	1	B	2021-08-16	B3	287.406
LVC115	1	C	2021-08-16	C4	174.401
LVC115	1	C	2021-08-16	C5	194.874
LVC116	1	A	2021-08-24	A1	101.66
LVC116	1	A	2021-08-24	A2	122.853
LVC116	1	B	2021-08-24	B3	94.1601
LVC116	1	C	2021-08-24	C4	112.143
LVC116	1	C	2021-08-24	C5	117.588
LVC308	1	A	2021-08-20	A1	192.591
LVC308	1	A	2021-08-20	A2	171.719
LVC308	1	B	2021-08-20	B3	128.15
LVC308	1	C	2021-08-20	C4	153.339
LVC308	1	C	2021-08-20	C5	122.51
LVC309	1	A	2021-08-18	A1	40.3622
LVC309	1	A	2021-08-18	A2	63.2219
LVC309	1	B	2021-08-18	B3	128.983
LVC309	1	C	2021-08-18	C4	89.6692
LVC309	1	C	2021-08-18	C5	52.3721
LVC311	1	A	2021-08-18	A1	73.3733
LVC311	1	A	2021-08-18	A2	94.8765
LVC311	1	B	2021-08-18	B3	77.6754
LVC311	1	C	2021-08-18	C4	88.2708
LVC311	1	C	2021-08-18	C5	84.2706
LVC312	1	A	2021-08-20	A1	151.326
LVC312	1	A	2021-08-20	A2	164.03
LVC312	1	B	2021-08-20	B3	135.063
LVC312	1	C	2021-08-20	C4	85.4243
LVC312	1	C	2021-08-20	C5	81.3034
LVC313	1	A	2021-08-24	A1	112.04
LVC313	1	A	2021-08-24	A2	118.658
LVC313	1	B	2021-08-24	B3	59.2381
LVC313	1	C	2021-08-24	C4	110.731
LVC313	1	C	2021-08-24	C5	87.9908
LVC104	1	A	2021-09-08	A1	115.05
LVC104	1	A	2021-09-08	A2	119.012
LVC104	1	B	2021-09-08	B3	170.948
LVC104	1	C	2021-09-08	C4	111.137
LVC104	1	C	2021-09-08	C5	98.6672
LVC105	1	A	2021-09-13	A1	123.794
LVC105	1	A	2021-09-13	A2	169.764
LVC105	1	B	2021-09-13	B3	207.166
LVC105	1	C	2021-09-13	C4	174.337
LVC105	1	C	2021-09-13	C5	217.603
LVC106	1	A	2021-09-13	A1	190.057
LVC106	1	A	2021-09-13	A2	188.678
LVC106	1	B	2021-09-13	B3	260.796
LVC106	1	C	2021-09-13	C4	215.775
LVC106	1	C	2021-09-13	C5	214.66
LVC107	1	A	2021-09-09	A1	103.701
LVC107	1	A	2021-09-09	A2	128.662
LVC107	1	B	2021-09-09	B3	109.621
LVC107	1	C	2021-09-09	C4	92.5391
LVC107	1	C	2021-09-09	C5	106.438
LVC108	1	A	2021-09-17	A1	130.41
LVC108	1	A	2021-09-17	A2	90.6524
LVC108	1	B	2021-09-17	B3	119.744
LVC108	1	C	2021-09-17	C4	180.699
LVC108	1	C	2021-09-17	C5	143.972
LVC109	1	A	2021-09-08	A1	114.112
LVC109	1	A	2021-09-08	A2	85.177
LVC109	1	B	2021-09-08	B3	98.99
LVC109	1	C	2021-09-08	C4	125.551
LVC109	1	C	2021-09-08	C5	134.147
LVC110	1	A	2021-09-09	A1	133.856
LVC110	1	A	2021-09-09	A2	175.73
LVC110	1	B	2021-09-09	B3	184.735
LVC110	1	C	2021-09-09	C4	97.7249
LVC110	1	C	2021-09-09	C5	250.995
LVC111	1	A	2021-09-23	A1	96.2728
LVC111	1	A	2021-09-23	A2	92.2779
LVC111	1	B	2021-09-23	B3	88.803
LVC111	1	C	2021-09-23	C4	120.819
LVC111	1	C	2021-09-23	C5	88.1388
LVC112	1	A	2021-09-24	A1	108.017
LVC112	1	A	2021-09-24	A2	76.6408
LVC112	1	B	2021-09-24	B3	90.5147
LVC112	1	C	2021-09-24	C4	85.9128
LVC112	1	C	2021-09-24	C5	66.6101
LVC115	1	A	2021-09-14	A1	138.696
LVC115	1	A	2021-09-14	A2	115.579
LVC115	1	B	2021-09-14	B3	116.775
LVC115	1	C	2021-09-14	C4	113.727
LVC115	1	C	2021-09-14	C5	116.438
LVC116	1	A	2021-09-27	A1	102.444
LVC116	1	A	2021-09-27	A2	102.154
LVC116	1	B	2021-09-27	B3	105.227
LVC116	1	C	2021-09-27	C4	61.9166
LVC116	1	C	2021-09-27	C5	70.6402
LVC308	1	A	2021-09-22	A1	126.801
LVC308	1	A	2021-09-22	A2	80.6281
LVC308	1	B	2021-09-22	B3	97.2799
LVC308	1	C	2021-09-22	C4	71.7088
LVC308	1	C	2021-09-22	C5	61.7444
LVC309	1	A	2021-09-22	A1	24.4946
LVC309	1	A	2021-09-22	A2	36.7863
LVC309	1	B	2021-09-22	B3	96.365
LVC309	1	C	2021-09-22	C4	60.0467
LVC309	1	C	2021-09-22	C5	38.1441
LVC311	1	A	2021-09-22	A1	37.8906
LVC311	1	A	2021-09-22	A2	40.2485
LVC311	1	B	2021-09-22	B3	35.7419
LVC311	1	C	2021-09-22	C4	35.494
LVC311	1	C	2021-09-22	C5	38.0621
LVC312	1	A	2021-09-23	A1	79.9777
LVC312	1	A	2021-09-23	A2	73.4568
LVC312	1	B	2021-09-23	B3	23.6066
LVC312	1	C	2021-09-23	C4	58.791
LVC312	1	C	2021-09-23	C5	41.142
LVC313	1	A	2021-09-27	A1	51.1662
LVC313	1	A	2021-09-27	A2	44.2778
LVC313	1	B	2021-09-27	B3	58.1765
LVC313	1	C	2021-09-27	C4	54.1009
LVC313	1	C	2021-09-27	C5	71.2079
LVC104	1	A	2022-01-10	A1	34.1903
LVC104	1	A	2022-01-10	A2	12.9655
LVC104	1	B	2022-01-10	B3	33.328
LVC104	1	C	2022-01-10	C4	15.5271
LVC104	1	C	2022-01-10	C5	18.8605
LVC105	1	A	2022-01-12	A1	7.11686
LVC105	1	A	2022-01-12	A2	1.25734
LVC105	1	B	2022-01-12	B3	12.4151
LVC105	1	C	2022-01-12	C4	16.3781
LVC105	1	C	2022-01-12	C5	41.2496
LVC106	1	A	2022-01-12	A1	9.97803
LVC106	1	A	2022-01-12	A2	12.5906
LVC106	1	B	2022-01-12	B3	45.0985
LVC106	1	C	2022-01-12	C4	12.3515
LVC106	1	C	2022-01-12	C5	15.3337
LVC107	1	A	2022-01-11	A1	15.693
LVC107	1	A	2022-01-11	A2	10.1109
LVC107	1	B	2022-01-11	B3	12.6579
LVC107	1	C	2022-01-11	C4	11.9148
LVC107	1	C	2022-01-11	C5	7.43431
LVC108	1	A	2022-01-26	A1	4.86178
LVC108	1	A	2022-01-26	A2	9.66643
LVC108	1	B	2022-01-26	B3	9.60468
LVC108	1	C	2022-01-26	C4	11.376
LVC108	1	C	2022-01-26	C5	14.9349
LVC109	1	A	2022-01-10	A1	4.33136
LVC109	1	A	2022-01-10	A2	18.1416
LVC109	1	B	2022-01-10	B3	19.9023
LVC109	1	C	2022-01-10	C4	1.7496
LVC109	1	C	2022-01-10	C5	6.36109
LVC110	1	A	2022-01-11	A1	12.8237
LVC110	1	A	2022-01-11	A2	16.8146
LVC110	1	B	2022-01-11	B3	8.66288
LVC110	1	C	2022-01-11	C4	15.5163
LVC110	1	C	2022-01-11	C5	14.056
LVC111	1	A	2022-01-25	A1	4.18129
LVC111	1	A	2022-01-25	A2	3.11111
LVC111	1	B	2022-01-25	B3	4.19993
LVC111	1	C	2022-01-25	C4	7.01484
LVC111	1	C	2022-01-25	C5	2.05956
LVC112	1	A	2022-01-26	A1	1.88109
LVC112	1	A	2022-01-26	A2	14.2641
LVC112	1	B	2022-01-26	B3	20.4138
LVC112	1	C	2022-01-26	C4	6.84666
LVC112	1	C	2022-01-26	C5	2.48355
LVC115	1	A	2022-01-12	A1	11.0619
LVC115	1	A	2022-01-12	A2	12.0127
LVC115	1	B	2022-01-12	B3	5.78211
LVC115	1	C	2022-01-12	C4	9.08799
LVC115	1	C	2022-01-12	C5	6.74292
LVC116	1	A	2022-01-27	A1	7.32322
LVC116	1	A	2022-01-27	A2	8.33817
LVC116	1	B	2022-01-27	B3	4.70186
LVC116	1	C	2022-01-27	C4	11.3396
LVC116	1	C	2022-01-27	C5	5.58421
LVC308	1	A	2022-01-25	A1	2.95712
LVC308	1	A	2022-01-25	A2	5.68584
LVC308	1	B	2022-01-25	B3	14.7649
LVC308	1	C	2022-01-25	C4	6.23723
LVC308	1	C	2022-01-25	C5	10.2632
LVC309	1	A	2022-01-25	A1	-0.156225
LVC309	1	A	2022-01-25	A2	1.70306
LVC309	1	B	2022-01-25	B3	18.2048
LVC309	1	C	2022-01-25	C4	1.14995
LVC309	1	C	2022-01-25	C5	-2.08919
LVC311	1	A	2022-01-25	A1	-3.2166
LVC311	1	A	2022-01-25	A2	-6.30309
LVC311	1	B	2022-01-25	B3	6.35217
LVC311	1	C	2022-01-25	C4	-2.93992
LVC311	1	C	2022-01-25	C5	-4.15838
LVC312	1	A	2022-01-25	A1	5.13124
LVC312	1	A	2022-01-25	A2	-4.10531
LVC312	1	B	2022-01-25	B3	10.8356
LVC312	1	C	2022-01-25	C4	6.82322
LVC312	1	C	2022-01-25	C5	3.9784
LVC104	1	A	2022-10-10	A1	67.1404
LVC104	1	A	2022-10-10	A2	29.7649
LVC104	1	B	2022-10-10	B3	52.275
LVC104	1	C	2022-10-10	C4	50.1082
LVC104	1	C	2022-10-10	C5	39.7589
LVC105	1	A	2022-10-13	A1	65.1568
LVC105	1	A	2022-10-13	A2	56.7215
LVC105	1	B	2022-10-13	B3	78.3213
LVC105	1	C	2022-10-13	C4	24.7007
LVC105	1	C	2022-10-13	C5	54.742
LVC106	1	A	2022-10-13	A1	22.3901
LVC106	1	A	2022-10-13	A2	43.7557
LVC106	1	B	2022-10-13	B3	55.0295
LVC106	1	C	2022-10-13	C4	77.9298
LVC106	1	C	2022-10-13	C5	61.6242
LVC107	1	A	2022-10-11	A1	21.3777
LVC107	1	A	2022-10-11	A2	25.0805
LVC107	1	B	2022-10-11	B3	29.746
LVC107	1	C	2022-10-11	C4	18.513
LVC107	1	C	2022-10-11	C5	39.9219
LVC108	1	A	2022-10-26	A1	45.3419
LVC108	1	A	2022-10-26	A2	62.9496
LVC108	1	B	2022-10-26	B3	53.0952
LVC108	1	C	2022-10-26	C4	76.8375
LVC108	1	C	2022-10-26	C5	43.819
LVC109	1	A	2022-10-10	A1	20.856
LVC109	1	A	2022-10-10	A2	49.2053
LVC109	1	B	2022-10-10	B3	38.0427
LVC109	1	C	2022-10-10	C4	39.4109
LVC109	1	C	2022-10-10	C5	33.8513
LVC110	1	A	2022-10-11	A1	31.9392
LVC110	1	A	2022-10-11	A2	23.8153
LVC110	1	B	2022-10-11	B3	49.1021
LVC110	1	C	2022-10-11	C4	16.5944
LVC110	1	C	2022-10-11	C5	65.7983
LVC111	1	A	2022-10-20	A1	32.3277
LVC111	1	A	2022-10-20	A2	40.4773
LVC111	1	B	2022-10-20	B3	25.0668
LVC111	1	C	2022-10-20	C4	31.9015
LVC111	1	C	2022-10-20	C5	50.6331
LVC115	1	A	2022-10-12	A1	73.499
LVC115	1	A	2022-10-12	A2	49.9915
LVC115	1	B	2022-10-12	B3	28.9334
LVC115	1	C	2022-10-12	C4	44.2676
LVC115	1	C	2022-10-12	C5	53.4889
LVC309	1	A	2022-10-19	A1	8.80834
LVC309	1	A	2022-10-19	A2	21.6108
LVC309	1	B	2022-10-19	B3	28.4459
LVC309	1	C	2022-10-19	C4	25.8636
LVC309	1	C	2022-10-19	C5	38.5508
LVC104	1	A	2022-11-09	A1	40.9749
LVC104	1	A	2022-11-09	A2	51.155
LVC104	1	B	2022-11-09	B3	51.6346
LVC104	1	C	2022-11-09	C4	86.8306
LVC104	1	C	2022-11-09	C5	72.9072
LVC105	1	A	2022-11-10	A1	43.6571
LVC105	1	A	2022-11-10	A2	32.9349
LVC105	1	B	2022-11-10	B3	53.5468
LVC105	1	C	2022-11-10	C4	71.7049
LVC105	1	C	2022-11-10	C5	71.6142
LVC106	1	A	2022-11-10	A1	105.07
LVC106	1	A	2022-11-10	A2	95.918
LVC106	1	B	2022-11-10	B3	60.018
LVC106	1	C	2022-11-10	C4	70.4346
LVC106	1	C	2022-11-10	C5	92.6426
LVC107	1	A	2022-11-11	A1	29.2202
LVC107	1	A	2022-11-11	A2	42.5645
LVC107	1	B	2022-11-11	B3	61.1649
LVC107	1	C	2022-11-11	C4	74.2749
LVC107	1	C	2022-11-11	C5	32.8702
LVC108	1	A	2022-11-24	A1	28.1668
LVC108	1	A	2022-11-24	A2	36.2129
LVC108	1	B	2022-11-24	B3	36.4382
LVC108	1	C	2022-11-24	C4	34.9021
LVC108	1	C	2022-11-24	C5	34.7772
LVC109	1	A	2022-11-09	A1	52.8881
LVC109	1	A	2022-11-09	A2	23.5217
LVC109	1	B	2022-11-09	B3	14.2379
LVC109	1	C	2022-11-09	C4	45.8422
LVC109	1	C	2022-11-09	C5	48.7572
LVC110	1	A	2022-11-11	A1	18.9041
LVC110	1	A	2022-11-11	A2	50.4127
LVC110	1	B	2022-11-11	B3	33.1492
LVC110	1	C	2022-11-11	C4	7.1179
LVC110	1	C	2022-11-11	C5	10.2305
LVC111	1	A	2022-11-22	A1	24.1952
LVC111	1	A	2022-11-22	A2	32.4187
LVC111	1	B	2022-11-22	B3	16.7305
LVC111	1	C	2022-11-22	C4	16.8899
LVC111	1	C	2022-11-22	C5	29.5925
LVC115	1	A	2022-11-14	A1	52.6645
LVC115	1	A	2022-11-14	A2	88.9009
LVC115	1	B	2022-11-14	B3	38.0444
LVC115	1	C	2022-11-14	C4	66.6438
LVC115	1	C	2022-11-14	C5	44.0072
LVC309	1	A	2022-11-22	A1	23.7971
LVC309	1	A	2022-11-22	A2	23.914
LVC309	1	B	2022-11-22	B3	33.4831
LVC309	1	C	2022-11-22	C4	35.1562
LVC309	1	C	2022-11-22	C5	24.7596
LVC104	1	A	2022-12-06	A1	51.9598
LVC104	1	A	2022-12-06	A2	66.6793
LVC104	1	B	2022-12-06	B3	65.5873
LVC104	1	C	2022-12-06	C4	46.2368
LVC104	1	C	2022-12-06	C5	51.2521
LVC105	1	A	2022-12-08	A1	54.4894
LVC105	1	A	2022-12-08	A2	40.2121
LVC105	1	B	2022-12-08	B3	57.7229
LVC105	1	C	2022-12-08	C4	66.8523
LVC105	1	C	2022-12-08	C5	56.9379
LVC106	1	A	2022-12-08	A1	53.5589
LVC106	1	A	2022-12-08	A2	65.2902
LVC106	1	B	2022-12-08	B3	51.5412
LVC106	1	C	2022-12-08	C4	58.3822
LVC106	1	C	2022-12-08	C5	59.8261
LVC107	1	A	2022-12-07	A1	42.8533
LVC107	1	A	2022-12-07	A2	51.5511
LVC107	1	B	2022-12-07	B3	55.1626
LVC107	1	C	2022-12-07	C4	42.892
LVC107	1	C	2022-12-07	C5	37.1341
LVC108	1	A	2022-12-15	A1	27.7588
LVC108	1	A	2022-12-15	A2	40.203
LVC108	1	B	2022-12-15	B3	51.6704
LVC108	1	C	2022-12-15	C4	50.7699
LVC108	1	C	2022-12-15	C5	52.4474
LVC109	1	A	2022-12-07	A1	32.4402
LVC109	1	A	2022-12-07	A2	33.699
LVC109	1	B	2022-12-07	B3	28.4824
LVC109	1	C	2022-12-07	C4	31.7064
LVC109	1	C	2022-12-07	C5	34.7589
LVC110	1	A	2022-12-07	A1	27.9017
LVC110	1	A	2022-12-07	A2	27.2946
LVC110	1	B	2022-12-07	B3	30.9792
LVC110	1	C	2022-12-07	C4	31.656
LVC110	1	C	2022-12-07	C5	36.0271
LVC111	1	A	2022-12-15	A1	32.8742
LVC111	1	A	2022-12-15	A2	29.2566
LVC111	1	B	2022-12-15	B3	25.8697
LVC111	1	C	2022-12-15	C4	26.3161
LVC111	1	C	2022-12-15	C5	28.9031
LVC115	1	A	2022-12-08	A1	48.0898
LVC115	1	A	2022-12-08	A2	43.8546
LVC115	1	B	2022-12-08	B3	56.7784
LVC115	1	C	2022-12-08	C4	43.6959
LVC115	1	C	2022-12-08	C5	75.3945
LVC309	1	A	2022-12-19	A1	50.4742
LVC309	1	A	2022-12-19	A2	17.4456
LVC309	1	B	2022-12-19	B3	16.0162
LVC309	1	C	2022-12-19	C4	25.0712
LVC309	1	C	2022-12-19	C5	23.53
LVC104	1	A	2022-02-10	A1	23.7494
LVC104	1	A	2022-02-10	A2	8.87388
LVC104	1	B	2022-02-10	B3	154.453
LVC104	1	C	2022-02-10	C4	3.48043
LVC104	1	C	2022-02-10	C5	9.79069
LVC105	1	A	2022-02-15	A1	13.7928
LVC105	1	A	2022-02-15	A2	37.3855
LVC105	1	B	2022-02-15	B3	19.9149
LVC105	1	C	2022-02-15	C4	11.345
LVC105	1	C	2022-02-15	C5	27.3736
LVC106	1	A	2022-02-15	A1	13.3119
LVC106	1	A	2022-02-15	A2	18.2997
LVC106	1	B	2022-02-15	B3	53.3842
LVC106	1	C	2022-02-15	C4	35.3385
LVC106	1	C	2022-02-15	C5	10.6564
LVC107	1	A	2022-02-10	A1	17.5519
LVC107	1	A	2022-02-10	A2	12.0121
LVC107	1	B	2022-02-10	B3	13.3206
LVC107	1	C	2022-02-10	C4	13.9468
LVC107	1	C	2022-02-10	C5	18.5947
LVC108	1	A	2022-02-23	A1	4.24576
LVC108	1	A	2022-02-23	A2	3.31108
LVC108	1	B	2022-02-23	B3	3.84338
LVC108	1	C	2022-02-23	C4	3.55138
LVC108	1	C	2022-02-23	C5	4.29155
LVC109	1	A	2022-02-11	A1	6.41985
LVC109	1	A	2022-02-11	A2	11.8091
LVC109	1	B	2022-02-11	B3	10.8696
LVC109	1	C	2022-02-11	C4	12.0172
LVC109	1	C	2022-02-11	C5	7.66874
LVC110	1	A	2022-02-11	A1	12.5404
LVC110	1	A	2022-02-11	A2	16.0578
LVC110	1	B	2022-02-11	B3	9.11607
LVC110	1	C	2022-02-11	C4	8.58911
LVC110	1	C	2022-02-11	C5	20.9147
LVC111	1	A	2022-02-21	A1	1.58998
LVC111	1	A	2022-02-21	A2	18.5154
LVC111	1	B	2022-02-21	B3	-0.216007
LVC111	1	C	2022-02-21	C4	3.64844
LVC111	1	C	2022-02-21	C5	8.3202
LVC309	1	A	2022-02-21	A1	0.829545
LVC309	1	A	2022-02-21	A2	3.34401
LVC309	1	B	2022-02-21	B3	3.50089
LVC309	1	C	2022-02-21	C4	1.93953
LVC309	1	C	2022-02-21	C5	5.26327
LVC311	1	A	2022-02-21	A1	2.02487
LVC311	1	A	2022-02-21	A2	2.7697
LVC311	1	B	2022-02-21	B3	7.59339
LVC311	1	C	2022-02-21	C4	3.69061
LVC311	1	C	2022-02-21	C5	9.2418
LVC312	1	A	2022-02-21	A1	5.46677
LVC312	1	A	2022-02-21	A2	1.46108
LVC312	1	B	2022-02-21	B3	2.4063
LVC312	1	C	2022-02-21	C4	17.2405
LVC312	1	C	2022-02-21	C5	11.336
LVC104	1	A	2022-03-09	A1	35.4979
LVC104	1	A	2022-03-09	A2	12.3335
LVC104	1	B	2022-03-09	B3	59.2279
LVC104	1	C	2022-03-09	C4	18.6905
LVC104	1	C	2022-03-09	C5	19.085
LVC105	1	A	2022-03-14	A1	38.5762
LVC105	1	A	2022-03-14	A2	22.6035
LVC105	1	B	2022-03-14	B3	33.7107
LVC105	1	C	2022-03-14	C4	30.6017
LVC105	1	C	2022-03-14	C5	23.9952
LVC106	1	A	2022-03-14	A1	54.666
LVC106	1	A	2022-03-14	A2	27.0853
LVC106	1	B	2022-03-14	B3	62.0714
LVC106	1	C	2022-03-14	C4	34.7694
LVC106	1	C	2022-03-14	C5	33.271
LVC107	1	A	2022-03-10	A1	11.2137
LVC107	1	A	2022-03-10	A2	6.39896
LVC107	1	B	2022-03-10	B3	28.4551
LVC107	1	C	2022-03-10	C4	44.5991
LVC107	1	C	2022-03-10	C5	10.8698
LVC108	1	A	2022-03-23	A1	3.20939
LVC108	1	A	2022-03-23	A2	3.80263
LVC108	1	B	2022-03-23	B3	3.26924
LVC108	1	C	2022-03-23	C4	3.90164
LVC108	1	C	2022-03-23	C5	4.32836
LVC109	1	A	2022-03-09	A1	1.91439
LVC109	1	A	2022-03-09	A2	5.00304
LVC109	1	B	2022-03-09	B3	2.45032
LVC109	1	C	2022-03-09	C4	3.52603
LVC109	1	C	2022-03-09	C5	3.32311
LVC110	1	A	2022-03-10	A1	12.9743
LVC110	1	A	2022-03-10	A2	13.0297
LVC110	1	B	2022-03-10	B3	6.53015
LVC110	1	C	2022-03-10	C4	8.20587
LVC110	1	C	2022-03-10	C5	0.747077
LVC111	1	A	2022-03-23	A1	1.67313
LVC111	1	A	2022-03-23	A2	2.75703
LVC111	1	B	2022-03-23	B3	3.16971
LVC111	1	C	2022-03-23	C4	2.75135
LVC111	1	C	2022-03-23	C5	2.83836
LVC115	1	A	2022-03-14	A1	21.9858
LVC115	1	A	2022-03-14	A2	3.9697
LVC115	1	B	2022-03-14	B3	4.77571
LVC115	1	C	2022-03-14	C4	20.0525
LVC115	1	C	2022-03-14	C5	6.87416
LVC309	1	A	2022-03-22	A1	10.3591
LVC309	1	A	2022-03-22	A2	0.701251
LVC309	1	B	2022-03-22	B3	2.7233
LVC309	1	C	2022-03-22	C4	0.390551
LVC309	1	C	2022-03-22	C5	2.12309
LVC312	1	A	2022-03-22	A1	2.63377
LVC312	1	A	2022-03-22	A2	1.78138
LVC312	1	B	2022-03-22	B3	4.54717
LVC312	1	C	2022-03-22	C4	2.37878
LVC312	1	C	2022-03-22	C5	2.1394
LVC104	1	A	2022-04-11	A1	45.6409
LVC104	1	A	2022-04-11	A2	55.5937
LVC104	1	B	2022-04-11	B3	73.732
LVC104	1	C	2022-04-11	C4	34.7794
LVC104	1	C	2022-04-11	C5	50.7319
LVC105	1	A	2022-04-13	A1	30.4467
LVC105	1	A	2022-04-13	A2	26.7629
LVC105	1	B	2022-04-13	B3	34.0012
LVC105	1	C	2022-04-13	C4	28.5318
LVC105	1	C	2022-04-13	C5	35.5344
LVC106	1	A	2022-04-13	A1	25.607
LVC106	1	A	2022-04-13	A2	43.5759
LVC106	1	B	2022-04-13	B3	44.3657
LVC106	1	C	2022-04-13	C4	46.5111
LVC106	1	C	2022-04-13	C5	37.8362
LVC107	1	A	2022-04-12	A1	36.1448
LVC107	1	A	2022-04-12	A2	27.0021
LVC107	1	B	2022-04-12	B3	59.8213
LVC107	1	C	2022-04-12	C4	37.5141
LVC107	1	C	2022-04-12	C5	28.2089
LVC108	1	A	2022-04-27	A1	17.056
LVC108	1	A	2022-04-27	A2	27.6681
LVC108	1	B	2022-04-27	B3	35.3191
LVC108	1	C	2022-04-27	C4	40.1413
LVC108	1	C	2022-04-27	C5	48.6673
LVC109	1	A	2022-04-11	A1	54.9727
LVC109	1	A	2022-04-11	A2	40.807
LVC109	1	B	2022-04-11	B3	106.482
LVC109	1	C	2022-04-11	C4	47.5069
LVC109	1	C	2022-04-11	C5	56.1545
LVC110	1	A	2022-04-12	A1	1.58171
LVC110	1	A	2022-04-12	A2	35.8334
LVC110	1	B	2022-04-12	B3	35.7458
LVC110	1	C	2022-04-12	C4	67.0838
LVC110	1	C	2022-04-12	C5	55.139
LVC111	1	A	2022-04-26	A1	62.1994
LVC111	1	A	2022-04-26	A2	65.6252
LVC111	1	B	2022-04-26	B3	21.7477
LVC111	1	C	2022-04-26	C4	27.8523
LVC111	1	C	2022-04-26	C5	42.268
LVC115	1	A	2022-04-13	A1	24.8456
LVC115	1	A	2022-04-13	A2	43.3867
LVC115	1	B	2022-04-13	B3	13.9674
LVC115	1	C	2022-04-13	C4	27.913
LVC115	1	C	2022-04-13	C5	24.4597
LVC309	1	A	2022-04-25	A1	12.3247
LVC309	1	A	2022-04-25	A2	37.1241
LVC309	1	B	2022-04-25	B3	67.4108
LVC309	1	C	2022-04-25	C4	19.1449
LVC309	1	C	2022-04-25	C5	8.54185
LVC312	1	A	2022-04-25	A1	19.5411
LVC312	1	A	2022-04-25	A2	23.6774
LVC312	1	B	2022-04-25	B3	44.0503
LVC312	1	C	2022-04-25	C4	33.727
LVC312	1	C	2022-04-25	C5	36.919
LVC104	1	A	2022-05-10	A1	36.939
LVC104	1	A	2022-05-10	A2	47.377
LVC104	1	B	2022-05-10	B3	26.8064
LVC104	1	C	2022-05-10	C4	35.3642
LVC104	1	C	2022-05-10	C5	51.7611
LVC105	1	A	2022-05-13	A1	96.5979
LVC105	1	A	2022-05-13	A2	71.1984
LVC105	1	B	2022-05-13	B3	80.8348
LVC105	1	C	2022-05-13	C4	78.2497
LVC105	1	C	2022-05-13	C5	97.944
LVC106	1	A	2022-05-13	A1	135.332
LVC106	1	A	2022-05-13	A2	98.5428
LVC106	1	B	2022-05-13	B3	105.984
LVC106	1	C	2022-05-13	C4	100.416
LVC106	1	C	2022-05-13	C5	98.4669
LVC107	1	A	2022-05-11	A1	31.9441
LVC107	1	A	2022-05-11	A2	31.9601
LVC107	1	B	2022-05-11	B3	32.7082
LVC107	1	C	2022-05-11	C4	36.3851
LVC107	1	C	2022-05-11	C5	40.3209
LVC108	1	A	2022-05-26	A1	115.27
LVC108	1	A	2022-05-26	A2	84.1571
LVC108	1	B	2022-05-26	B3	109.294
LVC108	1	C	2022-05-26	C4	143.579
LVC108	1	C	2022-05-26	C5	215.158
LVC109	1	A	2022-05-10	A1	138.526
LVC109	1	A	2022-05-10	A2	97.3391
LVC109	1	B	2022-05-10	B3	103.291
LVC109	1	C	2022-05-10	C4	58.0749
LVC109	1	C	2022-05-10	C5	80.198
LVC110	1	A	2022-05-11	A1	33.0069
LVC110	1	A	2022-05-11	A2	85.8302
LVC110	1	B	2022-05-11	B3	62.6592
LVC110	1	C	2022-05-11	C4	33.7668
LVC110	1	C	2022-05-11	C5	38.0185
LVC111	1	A	2022-05-24	A1	71.8036
LVC111	1	A	2022-05-24	A2	53.9773
LVC111	1	B	2022-05-24	B3	58.2346
LVC111	1	C	2022-05-24	C4	65.6872
LVC111	1	C	2022-05-24	C5	102.487
LVC115	1	A	2022-05-17	A1	49.149
LVC115	1	A	2022-05-17	A2	45.4693
LVC115	1	B	2022-05-17	B3	28.4215
LVC115	1	C	2022-05-17	C4	43.6285
LVC115	1	C	2022-05-17	C5	41.237
LVC309	1	A	2022-05-23	A1	48.0164
LVC309	1	A	2022-05-23	A2	126.191
LVC309	1	B	2022-05-23	B3	146.092
LVC309	1	C	2022-05-23	C4	50.1046
LVC309	1	C	2022-05-23	C5	16.4462
LVC104	1	A	2022-06-06	A1	151.232
LVC104	1	A	2022-06-06	A2	113.81
LVC104	1	B	2022-06-06	B3	116.798
LVC104	1	C	2022-06-06	C4	104.515
LVC104	1	C	2022-06-06	C5	155.894
LVC105	1	A	2022-06-08	A1	131.186
LVC105	1	A	2022-06-08	A2	153.072
LVC105	1	B	2022-06-08	B3	214.082
LVC105	1	C	2022-06-08	C4	197.119
LVC105	1	C	2022-06-08	C5	305.716
LVC106	1	A	2022-06-08	A1	349.992
LVC106	1	A	2022-06-08	A2	287.57
LVC106	1	B	2022-06-08	B3	372.477
LVC106	1	C	2022-06-08	C4	418.521
LVC106	1	C	2022-06-08	C5	339.761
LVC107	1	A	2022-06-07	A1	110.828
LVC107	1	A	2022-06-07	A2	95.15
LVC107	1	B	2022-06-07	B3	92.3054
LVC107	1	C	2022-06-07	C4	111.392
LVC107	1	C	2022-06-07	C5	103.012
LVC108	1	A	2022-06-27	A1	272.623
LVC108	1	A	2022-06-27	A2	206.23
LVC108	1	B	2022-06-27	B3	254.261
LVC108	1	C	2022-06-27	C4	335.009
LVC108	1	C	2022-06-27	C5	348.491
LVC109	1	A	2022-06-06	A1	156.585
LVC109	1	A	2022-06-06	A2	146.873
LVC109	1	B	2022-06-06	B3	183.344
LVC109	1	C	2022-06-06	C4	130.56
LVC109	1	C	2022-06-06	C5	190.099
LVC110	1	A	2022-06-07	A1	92.784
LVC110	1	A	2022-06-07	A2	115.057
LVC110	1	B	2022-06-07	B3	113.795
LVC110	1	C	2022-06-07	C4	116.865
LVC110	1	C	2022-06-07	C5	98.8189
LVC111	1	A	2022-06-20	A1	68.9091
LVC111	1	A	2022-06-20	A2	52.3368
LVC111	1	B	2022-06-20	B3	75.0763
LVC111	1	C	2022-06-20	C4	96.8947
LVC111	1	C	2022-06-20	C5	109.835
LVC115	1	A	2022-06-09	A1	147.612
LVC115	1	A	2022-06-09	A2	191.327
LVC115	1	B	2022-06-09	B3	142.595
LVC115	1	C	2022-06-09	C4	208.429
LVC115	1	C	2022-06-09	C5	168.693
LVC309	1	A	2022-06-22	A1	139.678
LVC309	1	A	2022-06-22	A2	210.94
LVC309	1	B	2022-06-22	B3	267.45
LVC309	1	C	2022-06-22	C4	119.85
LVC309	1	C	2022-06-22	C5	63.3208
LVC104	1	A	2022-07-07	A1	127.904
LVC104	1	A	2022-07-07	A2	107.523
LVC104	1	B	2022-07-07	B3	135.981
LVC104	1	C	2022-07-07	C4	105.475
LVC104	1	C	2022-07-07	C5	128.273
LVC105	1	A	2022-07-08	A1	245.223
LVC105	1	A	2022-07-08	A2	153.099
LVC105	1	B	2022-07-08	B3	145.216
LVC105	1	C	2022-07-08	C4	228.294
LVC105	1	C	2022-07-08	C5	232.177
LVC106	1	A	2022-07-08	A1	173.412
LVC106	1	A	2022-07-08	A2	199.748
LVC106	1	B	2022-07-08	B3	221.783
LVC106	1	C	2022-07-08	C4	210.119
LVC106	1	C	2022-07-08	C5	199.849
LVC107	1	A	2022-07-13	A1	160.31
LVC107	1	A	2022-07-13	A2	221.772
LVC107	1	B	2022-07-13	B3	328.029
LVC107	1	C	2022-07-13	C4	225.876
LVC107	1	C	2022-07-13	C5	200.975
LVC108	1	A	2022-07-21	A1	153.191
LVC108	1	A	2022-07-21	A2	155.247
LVC108	1	B	2022-07-21	B3	152.394
LVC108	1	C	2022-07-21	C4	172.447
LVC108	1	C	2022-07-21	C5	211.697
LVC109	1	A	2022-07-07	A1	151.943
LVC109	1	A	2022-07-07	A2	147.86
LVC109	1	B	2022-07-07	B3	136.648
LVC109	1	C	2022-07-07	C4	126.689
LVC109	1	C	2022-07-07	C5	163.364
LVC110	1	A	2022-07-13	A1	172.59
LVC110	1	A	2022-07-13	A2	139.134
LVC110	1	B	2022-07-13	B3	137.678
LVC110	1	C	2022-07-13	C4	134.905
LVC110	1	C	2022-07-13	C5	148.776
LVC111	1	A	2022-07-20	A1	117.703
LVC111	1	A	2022-07-20	A2	77.3864
LVC111	1	B	2022-07-20	B3	63.9372
LVC111	1	C	2022-07-20	C4	71.3244
LVC111	1	C	2022-07-20	C5	103.942
LVC115	1	A	2022-07-11	A1	202.293
LVC115	1	A	2022-07-11	A2	231.126
LVC115	1	B	2022-07-11	B3	224.798
LVC115	1	C	2022-07-11	C4	143.811
LVC115	1	C	2022-07-11	C5	115.896
LVC309	1	A	2022-07-19	A1	85.6108
LVC309	1	A	2022-07-19	A2	142.695
LVC309	1	B	2022-07-19	B3	142.787
LVC309	1	C	2022-07-19	C4	87.2034
LVC309	1	C	2022-07-19	C5	17.0403
LVC104	1	A	2022-08-08	A1	291.658
LVC104	1	A	2022-08-08	A2	155.558
LVC104	1	B	2022-08-08	B3	176.207
LVC104	1	C	2022-08-08	C4	173.669
LVC104	1	C	2022-08-08	C5	261.788
LVC105	1	A	2022-08-11	A1	243.875
LVC105	1	A	2022-08-11	A2	195.472
LVC105	1	B	2022-08-11	B3	238.734
LVC105	1	C	2022-08-11	C4	282.034
LVC105	1	C	2022-08-11	C5	307.481
LVC106	1	A	2022-08-11	A1	277.977
LVC106	1	A	2022-08-11	A2	218.943
LVC106	1	B	2022-08-11	B3	375.282
LVC106	1	C	2022-08-11	C4	253.983
LVC106	1	C	2022-08-11	C5	276.12
LVC107	1	A	2022-08-09	A1	106.582
LVC107	1	A	2022-08-09	A2	111.379
LVC107	1	B	2022-08-09	B3	96.4185
LVC107	1	C	2022-08-09	C4	99.2015
LVC107	1	C	2022-08-09	C5	106.502
LVC108	1	A	2022-08-23	A1	248.825
LVC108	1	A	2022-08-23	A2	226.001
LVC108	1	B	2022-08-23	B3	220.767
LVC108	1	C	2022-08-23	C4	238.291
LVC108	1	C	2022-08-23	C5	197.15
LVC109	1	A	2022-08-08	A1	86.7776
LVC109	1	A	2022-08-08	A2	60.9161
LVC109	1	B	2022-08-08	B3	73.6675
LVC109	1	C	2022-08-08	C4	75.5264
LVC109	1	C	2022-08-08	C5	97.4707
LVC110	1	A	2022-08-09	A1	114.928
LVC110	1	A	2022-08-09	A2	142.771
LVC110	1	B	2022-08-09	B3	161.769
LVC110	1	C	2022-08-09	C4	112.163
LVC110	1	C	2022-08-09	C5	193.992
LVC111	1	A	2022-08-23	A1	245.213
LVC111	1	A	2022-08-23	A2	296.261
LVC111	1	B	2022-08-23	B3	150.428
LVC111	1	C	2022-08-23	C4	209.013
LVC111	1	C	2022-08-23	C5	267.122
LVC115	1	A	2022-08-10	A1	126.764
LVC115	1	A	2022-08-10	A2	118.319
LVC115	1	B	2022-08-10	B3	184.694
LVC115	1	C	2022-08-10	C4	135.45
LVC115	1	C	2022-08-10	C5	149.788
LVC309	1	A	2022-08-22	A1	179.857
LVC309	1	A	2022-08-22	A2	246.439
LVC309	1	B	2022-08-22	B3	225.731
LVC309	1	C	2022-08-22	C4	183.411
LVC309	1	C	2022-08-22	C5	121.485
LVC104	1	A	2022-09-09	A1	120.353
LVC104	1	A	2022-09-09	A2	91.3836
LVC104	1	B	2022-09-09	B3	79.9621
LVC104	1	C	2022-09-09	C4	57.4217
LVC104	1	C	2022-09-09	C5	79.9513
LVC105	1	A	2022-09-13	A1	337.205
LVC105	1	A	2022-09-13	A2	159.216
LVC105	1	B	2022-09-13	B3	243.672
LVC105	1	C	2022-09-13	C4	316.603
LVC105	1	C	2022-09-13	C5	200.988
LVC106	1	A	2022-09-13	A1	191.836
LVC106	1	A	2022-09-13	A2	148.936
LVC106	1	B	2022-09-13	B3	209.305
LVC106	1	C	2022-09-13	C4	198.021
LVC106	1	C	2022-09-13	C5	280.488
LVC107	1	A	2022-09-08	A1	116.172
LVC107	1	A	2022-09-08	A2	132.126
LVC107	1	B	2022-09-08	B3	115.516
LVC107	1	C	2022-09-08	C4	103.346
LVC107	1	C	2022-09-08	C5	73.0696
LVC108	1	A	2022-09-23	A1	191.81
LVC108	1	A	2022-09-23	A2	81.1998
LVC108	1	B	2022-09-23	B3	112.558
LVC108	1	C	2022-09-23	C4	114.381
LVC108	1	C	2022-09-23	C5	108.953
LVC109	1	A	2022-09-09	A1	110.984
LVC109	1	A	2022-09-09	A2	91.0166
LVC109	1	B	2022-09-09	B3	90.8743
LVC109	1	C	2022-09-09	C4	98.0536
LVC109	1	C	2022-09-09	C5	91.4249
LVC110	1	A	2022-09-08	A1	69.3277
LVC110	1	A	2022-09-08	A2	87.7034
LVC110	1	B	2022-09-08	B3	99.7773
LVC110	1	C	2022-09-08	C4	48.7697
LVC110	1	C	2022-09-08	C5	67.9433
LVC111	1	A	2022-09-20	A1	116.952
LVC111	1	A	2022-09-20	A2	121.916
LVC111	1	B	2022-09-20	B3	102.725
LVC111	1	C	2022-09-20	C4	99.4842
LVC111	1	C	2022-09-20	C5	126.696
LVC115	1	A	2022-09-12	A1	159.441
LVC115	1	A	2022-09-12	A2	192.567
LVC115	1	B	2022-09-12	B3	219.922
LVC115	1	C	2022-09-12	C4	101.898
LVC115	1	C	2022-09-12	C5	101.11
LVC309	1	A	2022-09-19	A1	66.2958
LVC309	1	A	2022-09-19	A2	105.452
LVC309	1	B	2022-09-19	B3	103.291
LVC309	1	C	2022-09-19	C4	183.033
LVC309	1	C	2022-09-19	C5	70.8493
LVC108	2	1	2021-03-16	1	24.5081
LVC108	2	1	2021-04-21	1	13.9203
LVC108	2	1	2021-06-03	1	87.953
LVC108	2	1	2021-07-07	1	205.927
LVC108	2	1	2021-07-27	1	84.6985
LVC108	2	1	2021-09-02	1	25.061
LVC108	2	1	2021-09-29	1	63.1125
LVC108	2	1	2021-10-26	1	50.9673
LVC108	2	1	2021-11-24	1	18.9563
LVC108	2	1	2021-03-16	2	42.9315
LVC108	2	1	2021-04-21	2	7.44551
LVC108	2	1	2021-06-03	2	127.577
LVC108	2	1	2021-07-07	2	235.561
LVC108	2	1	2021-07-27	2	129.534
LVC108	2	1	2021-09-02	2	28.4336
LVC108	2	1	2021-09-29	2	60.135
LVC108	2	1	2021-10-26	2	34.4111
LVC108	2	1	2021-11-24	2	19.7681
LVC108	2	1	2021-03-16	3	19.1103
LVC108	2	1	2021-04-21	3	18.3766
LVC108	2	1	2021-06-03	3	154.777
LVC108	2	1	2021-07-07	3	163.601
LVC108	2	1	2021-07-27	3	154.575
LVC108	2	1	2021-09-02	3	58.366
LVC108	2	1	2021-09-29	3	69.5595
LVC108	2	1	2021-10-26	3	45.5045
LVC108	2	1	2021-11-24	3	27.2564
LVC313	2	1	2021-04-07	1	0.0154333
LVC313	2	1	2021-05-11	1	12.4534
LVC313	2	1	2021-06-09	1	151.92
LVC313	2	1	2021-07-14	1	211.573
LVC313	2	1	2021-08-11	1	136.224
LVC313	2	1	2021-09-16	1	21.2405
LVC313	2	1	2021-10-13	1	47.4435
LVC313	2	1	2021-11-12	1	11.6921
LVC313	2	1	2021-04-07	2	3.87197
LVC313	2	1	2021-05-11	2	40.2156
LVC313	2	1	2021-06-09	2	122.803
LVC313	2	1	2021-07-14	2	137.544
LVC313	2	1	2021-08-11	2	94.9972
LVC313	2	1	2021-09-16	2	14.687
LVC313	2	1	2021-10-13	2	18.5028
LVC313	2	1	2021-11-12	2	10.7064
LVC313	2	1	2021-04-07	3	2.29425
LVC313	2	1	2021-05-11	3	8.19071
LVC313	2	1	2021-06-09	3	114.933
LVC313	2	1	2021-07-14	3	205.87
LVC313	2	1	2021-08-11	3	44.0259
LVC313	2	1	2021-09-16	3	16.2533
LVC313	2	1	2021-10-13	3	30.5764
LVC313	2	1	2021-11-12	3	18.4807
LVC313	2	1	2021-12-16	1	14.0571
LVC313	2	1	2021-12-16	2	5.13353
LVC313	2	1	2021-12-16	3	3.92607
LVC108	2	1	2021-12-16	1	1.67123
LVC108	2	1	2021-12-16	2	3.66512
LVC108	2	1	2021-12-16	3	9.36089
EEC108	1	A	2021-01-14	1	7.745
EEC108	1	A	2021-01-14	2	1.82
EEC108	1	B	2021-01-14	3	1.744
EEC108	1	B	2021-01-14	4	8.184
EEC108	1	C	2021-01-14	5	11.385
EEC108	1	C	2021-01-14	6
EEC106	1	A	2021-01-14	1	30.155
EEC106	1	A	2021-01-14	2	21.068
EEC106	1	B	2021-01-14	3	26.244
EEC106	1	B	2021-01-14	4	22.603
EEC106	1	C	2021-01-14	5	24.303
EEC106	1	C	2021-01-14	6	16.661
EEC105	1	A	2021-01-14	1	15.568
EEC105	1	A	2021-01-14	2	13.17
EEC105	1	B	2021-01-14	3	21.014
EEC105	1	B	2021-01-14	4	21.598
EEC105	1	C	2021-01-14	5	11.553
EEC105	1	C	2021-01-14	6	16.887
EEC104	1	A	2021-01-14	1	19.371
EEC104	1	A	2021-01-14	2	19.416
EEC104	1	B	2021-01-14	3	11.839
EEC104	1	B	2021-01-14	4	6.226
EEC104	1	C	2021-01-14	5	16.52
EEC104	1	C	2021-01-14	6	10.967
EEC109	1	A	2021-01-13	1	32.139
EEC109	1	A	2021-01-13	2	16.985
EEC109	1	B	2021-01-13	3	37.242
EEC109	1	B	2021-01-13	4	25.68
EEC109	1	C	2021-01-13	5	8.739
EEC109	1	C	2021-01-13	6	8.715
EEC108	1	A	2021-01-26	1	16.627
EEC108	1	A	2021-01-26	2	7.053
EEC108	1	B	2021-01-26	3	17.063
EEC108	1	B	2021-01-26	4	15.936
EEC108	1	C	2021-01-26	5	9.972
EEC108	1	C	2021-01-26	6	11.813
EEC106	1	A	2021-01-26	1	28.441
EEC106	1	A	2021-01-26	2	22.215
EEC106	1	B	2021-01-26	3	25.277
EEC106	1	B	2021-01-26	4	21.584
EEC106	1	C	2021-01-26	5	19.387
EEC106	1	C	2021-01-26	6	18.625
EEC105	1	A	2021-01-26	1	20.811
EEC105	1	A	2021-01-26	2	16.344
EEC105	1	B	2021-01-26	3	25.791
EEC105	1	B	2021-01-26	4	25.806
EEC105	1	C	2021-01-26	5	18.399
EEC105	1	C	2021-01-26	6	15.744
EEC104	1	A	2021-01-26	1	24.061
EEC104	1	A	2021-01-26	2	28.484
EEC104	1	B	2021-01-26	3	12.544
EEC104	1	B	2021-01-26	4	19.175
EEC104	1	C	2021-01-26	5	18.831
EEC104	1	C	2021-01-26	6	18.132
EEC109	1	A	2021-01-28	1	47.651
EEC109	1	A	2021-01-28	2	51.834
EEC109	1	B	2021-01-28	3	39.535
EEC109	1	B	2021-01-28	4	36.379
EEC109	1	C	2021-01-28	5	12.812
EEC109	1	C	2021-01-28	6	16.238
EEC108	1	A	2021-02-12	1	11.108
EEC108	1	A	2021-02-12	2	11.039
EEC108	1	B	2021-02-12	3	11.91
EEC108	1	B	2021-02-12	4	13.52
EEC108	1	C	2021-02-12	5	12.303
EEC108	1	C	2021-02-12	6	9.653
EEC106	1	A	2021-02-12	1	29.094
EEC106	1	A	2021-02-12	2	16.433
EEC106	1	B	2021-02-12	3	23.764
EEC106	1	B	2021-02-12	4	9.211
EEC106	1	C	2021-02-12	5	9.371
EEC106	1	C	2021-02-12	6	7.644
EEC105	1	A	2021-02-12	1	14.236
EEC105	1	A	2021-02-12	2	10.107
EEC105	1	B	2021-02-12	3	11.978
EEC105	1	B	2021-02-12	4	16.745
EEC105	1	C	2021-02-12	5	5.721
EEC105	1	C	2021-02-12	6	9.291
EEC104	1	A	2021-02-12	1	17.258
EEC104	1	A	2021-02-12	2	16.954
EEC104	1	B	2021-02-12	3	16.056
EEC104	1	B	2021-02-12	4	13.109
EEC104	1	C	2021-02-12	5	13.514
EEC104	1	C	2021-02-12	6	16.611
EEC109	1	A	2021-02-14	1	47.804
EEC109	1	A	2021-02-14	2	46.462
EEC109	1	B	2021-02-14	3	33.817
EEC109	1	B	2021-02-14	4	37.02
EEC109	1	C	2021-02-14	5	12.419
EEC109	1	C	2021-02-14	6	10.324
EEC108	1	A	2021-02-23	1	8.816
EEC108	1	A	2021-02-23	2	0.364
EEC108	1	B	2021-02-23	3	4.011
EEC108	1	B	2021-02-23	4
EEC108	1	C	2021-02-23	5	4.996
EEC108	1	C	2021-02-23	6
EEC106	1	A	2021-02-24	1	24.073
EEC106	1	A	2021-02-24	2	18.749
EEC106	1	B	2021-02-24	3	20.928
EEC106	1	B	2021-02-24	4	15.763
EEC106	1	C	2021-02-24	5	13.369
EEC106	1	C	2021-02-24	6	12.904
EEC105	1	A	2021-02-23	1	14.415
EEC105	1	A	2021-02-23	2	13.825
EEC105	1	B	2021-02-23	3	13.32
EEC105	1	B	2021-02-23	4	10.33
EEC105	1	C	2021-02-23	5	14.495
EEC105	1	C	2021-02-23	6	10.703
EEC104	1	A	2021-02-24	1
EEC104	1	A	2021-02-24	2	12.704
EEC104	1	B	2021-02-24	3	15.041
EEC104	1	B	2021-02-24	4	15.996
EEC104	1	C	2021-02-24	5	18.588
EEC104	1	C	2021-02-24	6	18.615
EEC109	1	A	2021-02-28	1	40.485
EEC109	1	A	2021-02-28	2	52.991
EEC109	1	B	2021-02-28	3	28.716
EEC109	1	B	2021-02-28	4	23.561
EEC109	1	C	2021-02-28	5	9.063
EEC109	1	C	2021-02-28	6	11.859
EEC108	1	A	2021-03-11	1	5.998
EEC108	1	A	2021-03-11	2	2.543
EEC108	1	B	2021-03-11	3
EEC108	1	B	2021-03-11	4	2.685
EEC108	1	C	2021-03-11	5	9.463
EEC108	1	C	2021-03-11	6	5.151
EEC106	1	A	2021-03-11	1	7.929
EEC106	1	A	2021-03-11	2	12.818
EEC106	1	B	2021-03-11	3	7.803
EEC106	1	B	2021-03-11	4	9.848
EEC106	1	C	2021-03-11	5	16.005
EEC106	1	C	2021-03-11	6	11.415
EEC105	1	A	2021-03-09	1	13.138
EEC105	1	A	2021-03-09	2	12.586
EEC105	1	B	2021-03-09	3	19.517
EEC105	1	B	2021-03-09	4	12.449
EEC105	1	C	2021-03-09	5	10.855
EEC105	1	C	2021-03-09	6	12.417
EEC104	1	A	2021-03-11	1	12.476
EEC104	1	A	2021-03-11	2	17.5
EEC104	1	B	2021-03-11	3	14.131
EEC104	1	B	2021-03-11	4	11.025
EEC104	1	C	2021-03-11	5	14.443
EEC104	1	C	2021-03-11	6	13.026
EEC109	1	A	2021-03-14	1	2.355
EEC109	1	A	2021-03-14	2	28.02
EEC109	1	B	2021-03-14	3	26.744
EEC109	1	B	2021-03-14	4	27.456
EEC109	1	C	2021-03-14	5	11.341
EEC109	1	C	2021-03-14	6	8.771
EEC108	1	A	2021-03-25	1	5.368
EEC108	1	A	2021-03-25	2	10.941
EEC108	1	B	2021-03-25	3	13.2
EEC108	1	B	2021-03-25	4	14.187
EEC108	1	C	2021-03-25	5	11.917
EEC108	1	C	2021-03-25	6	11.987
EEC106	1	A	2021-03-25	1	39.765
EEC106	1	A	2021-03-25	2	11.136
EEC106	1	B	2021-03-25	3	16.945
EEC106	1	B	2021-03-25	4	16.826
EEC106	1	C	2021-03-25	5	14.71
EEC106	1	C	2021-03-25	6	15.088
EEC105	1	A	2021-03-25	1	26.262
EEC105	1	A	2021-03-25	2	20.087
EEC105	1	B	2021-03-25	3	14.072
EEC105	1	B	2021-03-25	4	4.739
EEC105	1	C	2021-03-25	5	4.254
EEC105	1	C	2021-03-25	6	14.996
EEC104	1	A	2021-03-25	1	21.956
EEC104	1	A	2021-03-25	2	0.921
EEC104	1	B	2021-03-25	3	16.754
EEC104	1	B	2021-03-25	4	15.153
EEC104	1	C	2021-03-25	5	13.383
EEC104	1	C	2021-03-25	6	15.306
EEC109	1	A	2021-03-24	1	8.603
EEC109	1	A	2021-03-24	2	49.676
EEC109	1	B	2021-03-24	3	3.168
EEC109	1	B	2021-03-24	4	15.803
EEC109	1	C	2021-03-24	5	7.786
EEC109	1	C	2021-03-24	6	11.315
EEC108	1	A	2021-04-15	1	51.103
EEC108	1	A	2021-04-15	2	29.336
EEC108	1	B	2021-04-15	3	31.23
EEC108	1	B	2021-04-15	4	29.866
EEC108	1	C	2021-04-15	5	41.874
EEC108	1	C	2021-04-15	6	26.511
EEC106	1	A	2021-04-15	1	49.397
EEC106	1	A	2021-04-15	2	49.779
EEC106	1	B	2021-04-15	3	41.71
EEC106	1	B	2021-04-15	4	40.05
EEC106	1	C	2021-04-15	5	31.371
EEC106	1	C	2021-04-15	6	30.371
EEC105	1	A	2021-04-15	1	29.041
EEC105	1	A	2021-04-15	2	26.091
EEC105	1	B	2021-04-15	3	24.274
EEC105	1	B	2021-04-15	4	36.674
EEC105	1	C	2021-04-15	5	23.372
EEC105	1	C	2021-04-15	6	22.197
EEC104	1	A	2021-04-15	1	34.727
EEC104	1	A	2021-04-15	2	46.519
EEC104	1	B	2021-04-15	3	29.864
EEC104	1	B	2021-04-15	4	29.135
EEC104	1	C	2021-04-15	5	32.724
EEC104	1	C	2021-04-15	6	23.33
EEC109	1	A	2021-04-13	1	47.88
EEC109	1	A	2021-04-13	2	61.623
EEC109	1	B	2021-04-13	3	42.001
EEC109	1	B	2021-04-13	4	46.98
EEC109	1	C	2021-04-13	5	18.014
EEC109	1	C	2021-04-13	6	21.633
EEC108	1	A	2021-04-30	1	48.86
EEC108	1	A	2021-04-30	2	38.845
EEC108	1	B	2021-04-30	3	23.913
EEC108	1	B	2021-04-30	4	48.101
EEC108	1	C	2021-04-30	5	43.245
EEC108	1	C	2021-04-30	6	39.744
EEC106	1	A	2021-04-30	1	64.694
EEC106	1	A	2021-04-30	2	64.089
EEC106	1	B	2021-04-30	3	53.721
EEC106	1	B	2021-04-30	4	48.889
EEC106	1	C	2021-04-30	5	36.204
EEC106	1	C	2021-04-30	6	4.975
EEC105	1	A	2021-04-30	1	38.132
EEC105	1	A	2021-04-30	2	37.777
EEC105	1	B	2021-04-30	3	38.016
EEC105	1	B	2021-04-30	4	47.324
EEC105	1	C	2021-04-30	5	33.474
EEC105	1	C	2021-04-30	6	32.277
EEC104	1	A	2021-04-30	1	47.595
EEC104	1	A	2021-04-30	2	19.526
EEC104	1	B	2021-04-30	3	41.814
EEC104	1	B	2021-04-30	4	41.099
EEC104	1	C	2021-04-30	5	42.746
EEC104	1	C	2021-04-30	6	31.476
EEC109	1	A	2021-04-29	1	64.9
EEC109	1	A	2021-04-29	2	71.742
EEC109	1	B	2021-04-29	3	54.858
EEC109	1	B	2021-04-29	4	54.231
EEC109	1	C	2021-04-29	5	27.005
EEC109	1	C	2021-04-29	6	33.513
EEC108	1	A	2021-05-10	1	76.119
EEC108	1	A	2021-05-10	2	70.515
EEC108	1	B	2021-05-10	3	65.266
EEC108	1	B	2021-05-10	4	75.087
EEC108	1	C	2021-05-10	5	79.239
EEC108	1	C	2021-05-10	6	67.881
EEC106	1	A	2021-05-16	1	119.041
EEC106	1	A	2021-05-16	2	126.447
EEC106	1	B	2021-05-16	3	109.718
EEC106	1	B	2021-05-16	4	112.851
EEC106	1	C	2021-05-16	5	94.423
EEC106	1	C	2021-05-16	6	97.72
EEC105	1	A	2021-05-17	1	114.057
EEC105	1	A	2021-05-17	2	101.725
EEC105	1	B	2021-05-17	3	106.757
EEC105	1	B	2021-05-17	4	116.3
EEC105	1	C	2021-05-17	5	101.448
EEC105	1	C	2021-05-17	6	104.961
EEC104	1	A	2021-05-16	1	79.32
EEC104	1	A	2021-05-16	2	88.434
EEC104	1	B	2021-05-16	3	97.931
EEC104	1	B	2021-05-16	4	91.155
EEC104	1	C	2021-05-16	5	88.742
EEC104	1	C	2021-05-16	6	53.751
EEC109	1	A	2021-05-17	1	141.605
EEC109	1	A	2021-05-17	2	160.38
EEC109	1	B	2021-05-17	3	147.568
EEC109	1	B	2021-05-17	4	133.614
EEC109	1	C	2021-05-17	5	78.455
EEC109	1	C	2021-05-17	6	81.135
EEC108	1	A	2021-05-31	1	83.341
EEC108	1	A	2021-05-31	2	86.678
EEC108	1	B	2021-05-31	3	60.813
EEC108	1	B	2021-05-31	4	70.926
EEC108	1	C	2021-05-31	5	79.571
EEC108	1	C	2021-05-31	6	64.496
EEC106	1	A	2021-05-30	1	130.491
EEC106	1	A	2021-05-30	2	109.87
EEC106	1	B	2021-05-30	3	112.704
EEC106	1	B	2021-05-30	4	102.272
EEC106	1	C	2021-05-30	5	98.853
EEC106	1	C	2021-05-30	6	99.233
EEC105	1	A	2021-05-30	1	79.652
EEC105	1	A	2021-05-30	2	75.151
EEC105	1	B	2021-05-30	3	79.368
EEC105	1	B	2021-05-30	4	94.821
EEC105	1	C	2021-05-30	5	71.382
EEC105	1	C	2021-05-30	6	74.582
EEC104	1	A	2021-05-31	1	89.644
EEC104	1	A	2021-05-31	2	75.845
EEC104	1	B	2021-05-31	3	76.563
EEC104	1	B	2021-05-31	4	84.349
EEC104	1	C	2021-05-31	5	75.3
EEC104	1	C	2021-05-31	6	83.765
EEC109	1	A	2021-05-28	1	148.261
EEC109	1	A	2021-05-28	2	148.853
EEC109	1	B	2021-05-28	3	117.145
EEC109	1	B	2021-05-28	4	106.017
EEC109	1	C	2021-05-28	5	73.529
EEC109	1	C	2021-05-28	6	69.914
EEC108	1	A	2021-06-15	1	91.388
EEC108	1	A	2021-06-15	2	126.533
EEC108	1	B	2021-06-15	3	129.717
EEC108	1	B	2021-06-15	4	133.641
EEC108	1	C	2021-06-15	5	109.011
EEC108	1	C	2021-06-15	6	102.659
EEC106	1	A	2021-06-15	1	173.411
EEC106	1	A	2021-06-15	2	179.212
EEC106	1	B	2021-06-15	3	141.812
EEC106	1	B	2021-06-15	4	146.769
EEC106	1	C	2021-06-15	5	121.263
EEC106	1	C	2021-06-15	6	57.079
EEC105	1	A	2021-06-15	1	49.899
EEC105	1	A	2021-06-15	2	33.059
EEC105	1	B	2021-06-15	3	56.343
EEC105	1	B	2021-06-15	4	88.734
EEC105	1	C	2021-06-15	5	20.354
EEC105	1	C	2021-06-15	6	45.872
EEC104	1	A	2021-06-15	1	14.891
EEC104	1	A	2021-06-15	2	20.693
EEC104	1	B	2021-06-15	3	57.603
EEC104	1	B	2021-06-15	4	44.899
EEC104	1	C	2021-06-15	5	54.019
EEC104	1	C	2021-06-15	6	83.484
EEC109	1	A	2021-06-18	1	158.438
EEC109	1	A	2021-06-18	2	77.793
EEC109	1	B	2021-06-18	3	164.005
EEC109	1	B	2021-06-18	4	120.831
EEC109	1	C	2021-06-18	5	89.562
EEC109	1	C	2021-06-18	6	36.753
EEC108	1	A	2021-07-02	1	134.873
EEC108	1	A	2021-07-02	2	130.137
EEC108	1	B	2021-07-02	3	148.257
EEC108	1	B	2021-07-02	4	149.654
EEC108	1	C	2021-07-02	5	149.867
EEC108	1	C	2021-07-02	6	119.562
EEC106	1	A	2021-06-29	1	248.628
EEC106	1	A	2021-06-29	2	207.479
EEC106	1	B	2021-06-29	3	162.279
EEC106	1	B	2021-06-29	4	198.728
EEC106	1	C	2021-06-29	5	142.261
EEC106	1	C	2021-06-29	6	117.326
EEC105	1	A	2021-06-29	1	121.179
EEC105	1	A	2021-06-29	2	116.769
EEC105	1	B	2021-06-29	3	122.374
EEC105	1	B	2021-06-29	4	157.277
EEC105	1	C	2021-06-29	5	104.89
[truncated: 1,653 more rows]

## Sheet: ground_vegetation
site	plot	subplot	replicate_id	sampling_date	agv	bgv
LVC116	1	A	1	2021-06-17	2.5808	5.6416
LVC116	1	A	2	2021-06-17	3.1616	7.2416
LVC116	1	A	3	2021-06-17	3.0304	4.6016
LVC116	1	A	4	2021-06-17	1.7296	6.7136
LVC116	1	B	1	2021-06-17	2.9664	5.6112
LVC116	1	B	2	2021-06-17	3.696	6.7312
LVC116	1	B	3	2021-06-17	5.8624	9.3568
LVC116	1	B	4	2021-06-17	2.4864	3.4432
LVC116	1	C	1	2021-06-17	3.7456	7.44
LVC116	1	C	2	2021-06-17	1.0752	6.3872
LVC116	1	C	3	2021-06-17	3.6704	3.4496
LVC116	1	C	4	2021-06-17	4.4672	6.9952
LVC104	1	A	1	2021-06-18	2.04	1.304
LVC104	1	A	2	2021-06-18	0.2704	0.4672
LVC104	1	A	3	2021-06-18	2.0656	1.0064
LVC104	1	A	4	2021-06-18	0.3744	0.4048
LVC104	1	B	1	2021-06-18	5.5056	0.9888
LVC104	1	B	2	2021-06-18	10.9264	2.4432
LVC104	1	B	3	2021-06-18	0.2672	0.2096
LVC104	1	B	4	2021-06-18	0.2864	0.328
LVC104	1	C	1	2021-06-18	3.1856	0.84
LVC104	1	C	2	2021-06-18	0.1568	0.0064
LVC104	1	C	3	2021-06-18	1.8464	0.0864
LVC104	1	C	4	2021-06-18	4.2352	0.616
LVC111	1	A	1	2021-06-19	0.5664	0.5984
LVC111	1	A	2	2021-06-19	0.4272	1.4176
LVC111	1	A	3	2021-06-19	0.6992	2.088
LVC111	1	A	4	2021-06-19	0.5808	1.8784
LVC111	1	B	1	2021-06-19	1.0048	0.9328
LVC111	1	B	2	2021-06-19	1.4192	1.0384
LVC111	1	B	3	2021-06-19	0.416	1.3024
LVC111	1	B	4	2021-06-19	0.7584	0.6064
LVC111	1	C	1	2021-06-19	0.6448	5.9616
LVC111	1	C	2	2021-06-19	1.7824	3.0152
LVC111	1	C	3	2021-06-19	0.704	4.536
LVC111	1	C	4	2021-06-19	0.8272	5.3008
LVC308	1	A	1	2021-06-30	3.3344	1.2656
LVC308	1	A	2	2021-06-30	1.968	1.4384
LVC308	1	A	3	2021-06-30	1.9552	0.944
LVC308	1	A	4	2021-06-30	3.2464	1.936
LVC308	1	B	1	2021-06-30	1.1376	1.096
LVC308	1	B	2	2021-06-30	4.4832	2.32
LVC308	1	B	3	2021-06-30	3.2336	1.0432
LVC308	1	B	4	2021-06-30	3.7264	1.2576
LVC308	1	C	1	2021-06-30	3.5216	1.4144
LVC308	1	C	2	2021-06-30	3.1296	2.9616
LVC308	1	C	3	2021-06-30	5.08	0.3808
LVC308	1	C	4	2021-06-30	3.0768	0.3216
LVC312	1	A	1	2021-06-30	0.6848	0.39248
LVC312	1	A	2	2021-06-30	0.2704	0.3392
LVC312	1	A	3	2021-06-30	2.512	2.136
LVC312	1	A	4	2021-06-30	0.5632	1.6576
LVC312	1	B	1	2021-06-30	3.8624	4.0336
LVC312	1	B	2	2021-06-30	2.6896	1.064
LVC312	1	B	3	2021-06-30	3.8864	2.2736
LVC312	1	B	4	2021-06-30	3.0976	1.256
LVC312	1	C	1	2021-06-30	1.6576	1.8848
LVC312	1	C	2	2021-06-30	1.6704	1.4352
LVC312	1	C	3	2021-06-30	4.1552	2.1248
LVC312	1	C	4	2021-06-30	0.4304	0.8128
LVC112	1	C	1	2021-07-08	0.5952	0.1488
LVC112	1	C	2	2021-07-08	0.632	0.32
LVC112	1	C	3	2021-07-08	4.1776	2.5568
LVC112	1	C	4	2021-07-08	2.0016	1.6144
LVC112	1	B	1	2021-07-08	1.3856	3.8752
LVC112	1	B	2	2021-07-08	4.9264	3.5712
LVC112	1	B	3	2021-07-08	1.7696	6.4416
LVC112	1	B	4	2021-07-08	1.6336	4.7184
LVC112	1	A	1	2021-07-08	0.4864	4.6528
LVC112	1	A	2	2021-07-08	0.848	3.1264
LVC112	1	A	3	2021-07-08	0.8192	3.2336
LVC112	1	A	4	2021-07-08	0.8352	3.1424
LVC107	1	B	1	2021-07-08	2.4432	2.2112
LVC107	1	B	2	2021-07-08	2.1232	3.3776
LVC107	1	B	3	2021-07-08	1.6976	1.4064
LVC107	1	B	4	2021-07-08	1.0544	1.7408
LVC107	1	C	1	2021-07-08	0.4304	2.6416
LVC107	1	C	2	2021-07-08	0.8288	2.4928
LVC107	1	C	3	2021-07-08	0.4736	3.288
LVC107	1	C	4	2021-07-08	0.9232	2.152
LVC107	1	A	1	2021-07-08	0.3632	8.2768
LVC107	1	A	2	2021-07-08	2.504	4.3296
LVC107	1	A	3	2021-07-08	2.1904	2.6848
LVC107	1	A	4	2021-07-08	2.9232	1.6064
LVC110	1	A	1	2021-07-08	2.752	0.5008
LVC110	1	A	2	2021-07-08	1.1264	2.9984
LVC110	1	A	3	2021-07-08	1.4384	2.736
LVC110	1	A	4	2021-07-08	2.0272	3.792
LVC110	1	B	1	2021-07-08	0.4	0.5424
LVC110	1	B	2	2021-07-08	0.9664	1.272
LVC110	1	B	3	2021-07-08	1.0752	0.8576
LVC110	1	B	4	2021-07-08	0.2384	2.7536
LVC110	1	C	1	2021-07-08	1.7472	2.104
LVC110	1	C	2	2021-07-08	0.3968	4.264
LVC110	1	C	3	2021-07-08	0.8432	2.2096
LVC110	1	C	4	2021-07-08	0.5008	5.016
LVC109	1	A	1	2021-07-20	0.4	3.6
LVC109	1	A	2	2021-07-20	0.4624	1.5616
LVC109	1	A	3	2021-07-20	0.3984	1.5296
LVC109	1	A	4	2021-07-20	1.8832	0.96
LVC109	1	B	1	2021-07-20	1.2304	1.128
LVC109	1	B	2	2021-07-20	0.3424	0.2528
LVC109	1	B	3	2021-07-20	2.7712	1.416
LVC109	1	B	4	2021-07-20	1.6144	2.6096
LVC109	1	C	1	2021-07-20	1.2544	1.5792
LVC109	1	C	2	2021-07-20	1.0928	0.8928
LVC109	1	C	3	2021-07-20	0.944	0.192
LVC109	1	C	4	2021-07-20	0.9792	0.5408
LVC309	1	A	1	2021-07-21	2.7776	2.032
LVC309	1	A	2	2021-07-21	4.0224	3.3344
LVC309	1	A	3	2021-07-21	1.7904	8.1424
LVC309	1	A	4	2021-07-21	2.12	5.8208
LVC309	1	B	1	2021-07-21	2.4928	4.9904
LVC309	1	B	2	2021-07-21	1.4752	3.3136
LVC309	1	B	3	2021-07-21	1.7424	1.6864
LVC309	1	B	4	2021-07-21	0.816	2.552
LVC309	1	C	1	2021-07-21	0.6288	1.68
LVC309	1	C	2	2021-07-21	0.2528	1.08
LVC309	1	C	3	2021-07-21	0.5104	1.352
LVC309	1	C	4	2021-07-21	0.688	3.4912
LVC108	1	A	1	2021-07-21	1.8272	1.2784
LVC108	1	A	2	2021-07-21	0.6864	0.7056
LVC108	1	A	3	2021-07-21	3.0848	3.7456
LVC108	1	A	4	2021-07-21	1.6704	0.7408
LVC108	1	B	1	2021-07-21	0.832	1.3872
LVC108	1	B	2	2021-07-21		4.384
LVC108	1	B	3	2021-07-21	1.2992	0.7648
LVC108	1	B	4	2021-07-21	1.568	0.6
LVC108	1	C	1	2021-07-21	2.9024	2.6512
LVC108	1	C	2	2021-07-21	2.5344	2.792
LVC108	1	C	3	2021-07-21	1.8032	4.7504
LVC108	1	C	4	2021-07-21		2.4448
LVC311	1	A	1	2021-07-21	1.6752	7.9488
LVC311	1	A	2	2021-07-21	1.8112	4.9056
LVC311	1	A	3	2021-07-21	1.5792	1.264
LVC311	1	A	4	2021-07-21	1.6848	7.7808
LVC311	1	B	1	2021-07-21	3.2048	8.792
LVC311	1	B	2	2021-07-21	2.1168	6.024
LVC311	1	B	3	2021-07-21	1.2192	0.4384
LVC311	1	B	4	2021-07-21	0.1344	0.9664
LVC311	1	C	1	2021-07-21	0.8736
LVC311	1	C	2	2021-07-21	0.6896	0.4224
LVC311	1	C	3	2021-07-21	2.0304	1.3632
LVC311	1	C	4	2021-07-21	1.1408	0.744
LVC115	1	B	1	2021-07-20	1.552	2.4368
LVC115	1	B	2	2021-07-20	4.1152	0.8288
LVC115	1	B	3	2021-07-20	3.7312	2.1376
LVC115	1	B	4	2021-07-20	1.0224	0.856
LVC106	1	B	1	2021-07-20	5.0768	2.2496
LVC106	1	B	2	2021-07-20	2.9712	0.8816
LVC106	1	B	3	2021-07-20	3.1232	1.4016
LVC106	1	B	4	2021-07-20	3.2256	1.192
LVC105	1	A	1	2021-07-20	3.92	0.3744
LVC105	1	A	2	2021-07-20	4.5104	0.1232
LVC105	1	A	3	2021-07-20	2.2208	0.3936
LVC105	1	A	4	2021-07-20	2.2512	0.392
LVC106	1	C	1	2021-07-20	3.4512	2.4368
LVC106	1	C	2	2021-07-20	1.752	2.4208
LVC106	1	C	3	2021-07-20	4.5568	1.152
LVC106	1	C	4	2021-07-20	1.4032	1.4528
LVC115	1	C	1	2021-07-20	1.816	1.368
LVC115	1	C	2	2021-07-20	0.8624	3.7808
LVC115	1	C	3	2021-07-20	0.7744	0.2224
LVC115	1	C	4	2021-07-20	0.072	0.5648
LVC105	1	C	1	2021-07-20	1.2976	2.1056
LVC105	1	C	2	2021-07-20	0.8672	2.4576
LVC105	1	C	3	2021-07-20	2.16	3.5328
LVC105	1	C	4	2021-07-20	4.7008	0.8128
LVC115	1	A	1	2021-07-20	0.1536	1.288
LVC115	1	A	2	2021-07-20	0.2224	3.8848
LVC115	1	A	3	2021-07-20	2.9216	3.4848
LVC115	1	A	4	2021-07-20	0.0416	8.7792
LVC105	1	B	1	2021-07-20	1.2304	2.0368
LVC105	1	B	2	2021-07-20	2.488	1.3232
LVC105	1	B	3	2021-07-20	1.7056	2.6368
LVC105	1	B	4	2021-07-20	2.208	1.1072
LVC106	1	A	1	2021-07-20	3.176	2.2288
LVC106	1	A	2	2021-07-20	4.6288	1.5504
LVC106	1	A	3	2021-07-20	1.9168	1.0864
LVC106	1	A	4	2021-07-20	3.3936	3.8992
LVC313	1	A	1	2021-07-29	5.7536	4.368
LVC313	1	A	2	2021-07-29	2.4912	1.8736
LVC313	1	A	3	2021-07-29	3.1936	1.624
LVC313	1	A	4	2021-07-29	5.6896	1.6672
LVC313	1	B	1	2021-07-29	4.5168	1.8416
LVC313	1	B	2	2021-07-29	2.0304	3.7408
LVC313	1	B	3	2021-07-29	4.5344	3.5152
LVC313	1	B	4	2021-07-29	3.0672	4.3472
LVC313	1	C	1	2021-07-29	5.8864	2.992
LVC313	1	C	2	2021-07-29	6.1328	4.1888
LVC313	1	C	3	2021-07-29	2.1424	2.4976
LVC313	1	C	4	2021-07-29	2.4016	4.44
LTC105	1	A	1	2022-08-09	2.1392
LTC105	1	A	2	2022-08-09	2.464
LTC105	1	B	1	2022-08-09	2.8336
LTC105	1	B	2	2022-08-09	3.0096
LTC105	1	C	1	2022-08-09	0.6752
LTC105	1	C	2	2022-08-09	2.032
LTC106	1	A	1	2022-08-09	0.704
LTC106	1	B	1	2022-08-09	0.8
LTC106	1	B	2	2022-08-09	0.96
LTC106	1	C	1	2022-08-09	1.12
LTC106	1	C	2	2022-08-09	0.96
LTC108	1	A	1	2022-08-09	4.6992
LTC108	1	A	2	2022-08-09	4.6832
LTC108	1	B	1	2022-08-09	4.4976
LTC108	1	B	2	2022-08-09	3.6976
LTC108	1	C	1	2022-08-09	3.2
LTC108	1	C	2	2022-08-09	3.512
LTC109	1	A	1	2022-08-09	6.64615
LTC109	1	A	2	2022-08-09	7.06923
LTC109	1	B	1	2022-08-09	13.1692
LTC109	1	B	2	2022-08-09	5.4
LTC109	1	C	1	2022-08-09	3.5964
LTC109	1	C	2	2022-08-09	3.7413
LTC106	1	A	1	2022-08-09	0.12
LTC106	1	A	2	2022-08-09	0.175625
LTC106	1	B	2	2022-08-09	0.088125
LTC106	1	C	1	2022-08-09	0.02125
LTC106	1	C	2	2022-08-09	0.020625
LTC108	1	A	1	2022-08-09	0.96875
LTC108	1	A	2	2022-08-09	5.14562
LTC108	1	B	1	2022-08-09	5.68179
LTC108	1	B	2	2022-08-09	1.81137
LTC108	1	C	1	2022-08-09	3.58541
LTC108	1	C	2	2022-08-09	0.428839
LTC109	1	A	1	2022-08-09	5.98923
LTC109	1	A	2	2022-08-09	1.81168
LTC109	1	B	1	2022-08-09	12.4586
LTC109	1	B	2	2022-08-09	0.988147
LTC109	1	C	1	2022-08-09	5.4431
LTC109	1	C	2	2022-08-09	3.0412

## Sheet: Rhet
site	plot	subplot	replicate_id	co2_rhet	date	start_time	end_time	t05	t10	t15	t20	t30	t40	moisture	wtl
LVC104	1	A	1	63.4097	2022-05-10	10:13:45	10:16:15		6		6	6	6	27	-77
LVC104	1	A	2	75.3986	2022-05-10	10:16:55	10:19:25		6		6	6	6	27	-77
LVC104	1	A	3	62.0196	2022-05-10	10:20:14	10:22:44		6		6	6	6	27	-77
LVC104	1	B	1	82.7109	2022-05-10	10:23:42	10:26:13		5		5	6	6	30	-85
LVC104	1	B	2	45.4014	2022-05-10	10:26:53	10:29:23		5		5	6	6	30	-85
LVC104	1	B	3	91.4015	2022-05-10	10:30:10	10:32:40		5		5	6	6	30	-85
LVC104	1	C	1	72.7892	2022-05-10	10:33:40	10:36:10		6		6	6	6	33	-90
LVC104	1	C	2	55.3934	2022-05-10	10:36:52	10:39:23		6		6	6	6	33	-90
LVC104	1	C	3	95.6666	2022-05-10	10:40:09	10:42:39		6		6	6	6	33	-90
LVC104	1	A	1	161.98	2022-06-06	09:46:19	09:48:50	12	12		13	10	9	45	-65
LVC104	1	A	2	182.338	2022-06-06	09:49:35	09:52:06	12	12		13	10	9	45	-65
LVC104	1	A	3	118.196	2022-06-06	09:52:47	09:55:17	12	12		13	10	9	45	-65
LVC104	1	B	1	222.198	2022-06-06	09:56:18	09:58:48	11	11		12	10	9	67	-72
LVC104	1	B	2	103.126	2022-06-06	09:59:27	10:01:58	11	11		12	10	9	67	-72
LVC104	1	B	3	139.061	2022-06-06	10:02:38	10:05:09	11	11		12	10	9	67	-72
LVC104	1	C	1	208.517	2022-06-06	10:06:06	10:08:36	11	11		12	9	8	37	-73
LVC104	1	C	2	143.312	2022-06-06	10:09:17	10:11:47	11	11		12	9	8	37	-73
LVC104	1	C	3	218.538	2022-06-06	10:12:28	10:14:59	11	11		12	9	8	37	-73
LVC104	1	A	1	98.1228	2021-05-10	10:28:49	10:31:19		7		7	6	5	39	-56
LVC104	1	A	2	78.9206	2021-05-10	10:32:09	10:34:39		7		7	6	5	39	-56
LVC104	1	A	3	59.5611	2021-05-10	10:35:36	10:38:06		7		7	6	5	39	-56
LVC104	1	B	1	99.0933	2021-05-10	10:41:51	10:44:21		7		7	6	6	52	-66
LVC104	1	B	2	94.8796	2021-05-10	10:44:59	10:47:29		7		7	6	6	52	-66
LVC104	1	B	3	106.774	2021-05-10	10:48:04	10:50:34		7		7	6	6	52	-66
LVC104	1	C	1	154.116	2021-05-10	10:55:26	10:57:56		7		7	6	6	34	-64
LVC104	1	C	2	135.826	2021-05-10	10:58:41	11:01:11		7		7	6	6	34	-64
LVC104	1	C	3	212.577	2021-05-10	11:01:56	11:04:26		7		7	6	6	34	-64
LVC104	1	A	1	311.805	2021-06-07	11:15:27	11:17:56		13		12	10	10	23	-75
LVC104	1	A	2	175.842	2021-06-07	11:18:24	11:20:54		13		12	10	10	23	-75
LVC104	1	A	3	173.417	2021-06-07	11:21:26	11:23:56		13		12	10	10	23	-75
LVC104	1	B	1	148.975	2021-06-07	11:25:26	11:27:56		13		11	10	9	43	-85
LVC104	1	B	2	151.181	2021-06-07	11:28:22	11:30:52		13		11	10	9	43	-85
LVC104	1	B	3	199.394	2021-06-07	11:31:21	11:33:51		13		11	10	9	43	-85
LVC104	1	C	1	313.125	2021-06-07	11:35:17	11:37:47		13		11	9	9	30	-87
LVC104	1	C	2	281.954	2021-06-07	11:38:25	11:40:55		13		11	9	9	30	-87
LVC104	1	C	3	415.019	2021-06-07	11:41:34	11:44:04		13		11	9	9	30	-87
LVC104	1	A	1	552.693	2021-07-08	10:10:25	10:12:55		19		18	15	14	13	-88
LVC104	1	A	2	337.724	2021-07-08	10:13:42	10:16:12		19		18	15	14	13	-88
LVC104	1	A	3	290.726	2021-07-08	10:17:00	10:19:30		19		18	15	14	13	-88
LVC104	1	B	1	270.393	2021-07-08	10:20:52	10:23:22		18		16	14	13	14	-109
LVC104	1	B	2	224.083	2021-07-08	10:24:23	10:26:53		18		16	14	13	14	-109
LVC104	1	B	3	236.76	2021-07-08	10:27:46	10:30:16		18		16	14	13	14	-109
LVC104	1	C	1	567.459	2021-07-08	10:32:00	10:34:29		19		16	13	12	24	-127
LVC104	1	C	2	376.83	2021-07-08	10:34:59	10:37:29		19		16	13	12	24	-127
LVC104	1	C	3	745.042	2021-07-08	10:38:12	10:40:42		19		16	13	12	24	-127
LVC104	1	A	1	414.466	2021-08-09	10:08:52	10:11:22		16		16	15	15	22	-88
LVC104	1	A	2	367.345	2021-08-09	10:11:59	10:14:29		16		16	15	15	22	-88
LVC104	1	A	3	193.248	2021-08-09	10:15:15	10:17:45		16		16	15	15	22	-88
LVC104	1	B	1	253.314	2021-08-09	10:18:54	10:21:23		16		15	14	13	18	-102
LVC104	1	B	2	178.014	2021-08-09	10:22:13	10:24:43		16		15	14	13	18	-102
LVC104	1	B	3	194.899	2021-08-09	10:25:23	10:27:53		16		15	14	13	18	-102
LVC104	1	C	1	399.535	2021-08-09	10:29:19	10:31:49		16		15	14	12	31	-116
LVC104	1	C	2	308.045	2021-08-09	10:32:29	10:34:59		16		15	14	12	31	-116
LVC104	1	C	3	512.755	2021-08-09	10:35:45	10:38:15		16		15	14	12	31	-116
LVC104	1	A	1	234.186	2021-09-08	09:57:49	10:00:18		16		16	15	15	22	-88
LVC104	1	A	2	160.218	2021-09-08	10:00:57	10:03:26		16		16	15	15	22	-88
LVC104	1	A	3	118.705	2021-09-08	10:04:09	10:06:39		16		16	15	15	22	-88
LVC104	1	B	1	194.71	2021-09-08	10:08:02	10:10:32		16		15	14	13	18	-102
LVC104	1	B	2	153.881	2021-09-08	10:11:18	10:13:47		16		15	14	13	18	-102
LVC104	1	B	3	128.142	2021-09-08	10:14:24	10:16:53		16		15	14	13	18	-102
LVC104	1	C	1	323.815	2021-09-08	10:18:35	10:21:05		16		15	14	12	18	-116
LVC104	1	C	2	209.735	2021-09-08	10:21:53	10:24:23		16		15	14	12	18	-116
LVC104	1	C	3	371.154	2021-09-08	10:25:03	10:27:32		16		15	14	12	18	-116
LVC104	1	A	1	104.157	2021-10-11	10:03:11	10:05:40		7		9	9	10	13	-88
LVC104	1	A	2	88.0452	2021-10-11	10:06:30	10:09:00		7		9	9	10	13	-88
LVC104	1	A	3	63.4329	2021-10-11	10:10:07	10:12:36		7		9	9	10	13	-88
LVC104	1	B	1	142.675	2021-10-11	10:13:26	10:15:56		7		8	9	9	29	-94
LVC104	1	B	2	86.5579	2021-10-11	10:16:47	10:19:16		7		8	9	9	29	-94
LVC104	1	B	3	87.5539	2021-10-11	10:19:57	10:22:26		7		8	9	9	29	-94
LVC104	1	C	1	186.007	2021-10-11	10:23:16	10:25:46		7		8	9	9	29	-107
LVC104	1	C	2	104.263	2021-10-11	10:26:28	10:28:57		7		8	9	9	29	-107
LVC104	1	C	3	210.26	2021-10-11	10:29:36	10:32:06		7		8	9	9	29	-107
LVC104	1	A	1	98.3608	2021-04-07	10:38:20	10:40:50		2		2	3	3		-65
LVC104	1	A	2	73.3787	2021-04-07	10:42:14	10:44:44		2		2	3	3		-65
LVC104	1	A	3	55.4911	2021-04-07	10:46:04	10:48:34		2		2	3	3		-65
LVC104	1	B	1	53.2527	2021-04-07	10:53:04	10:55:34		2		2	3	4		-73
LVC104	1	B	2	105.122	2021-04-07	10:56:23	10:58:53		2		2	3	4		-73
LVC104	1	B	3	108.789	2021-04-07	10:59:47	11:02:17		2		2	3	4		-73
LVC104	1	C	1	168.338	2021-04-07	11:05:51	11:08:21		2		2	4	4		-68
LVC104	1	C	2	84.7774	2021-04-07	11:09:36	11:12:05		2		2	4	4		-68
LVC104	1	C	3	80.3242	2021-04-07	11:13:22	11:17:14		2		2	4	4		-68
LVC104	1	A	1	257.66	2022-07-07	09:26:20	09:28:50	15	16		16	15	14	24	24
LVC104	1	A	2	453.43	2022-07-07	09:29:28	09:31:59	15	16		16	15	14	24	24
LVC104	1	A	3	229.97	2022-07-07	09:32:50	09:35:21	15	16		16	15	14	24	0
LVC104	1	B	1	281.07	2022-07-07	09:36:23	09:38:53	14	15		15	13	12	28	0
LVC104	1	B	2	173.976	2022-07-07	09:39:41	09:42:11	14	15		15	13	12	28	0
LVC104	1	B	3	220.725	2022-07-07	09:42:50	09:45:21	14	15		15	13	12	28	0
LVC104	1	C	1	622.001	2022-07-07	09:46:12	09:48:42	14	14		14	12	11	30	0
LVC104	1	C	2	339.802	2022-07-07	09:49:32	09:52:02	14	14		14	12	11	30	0
LVC104	1	C	3	507.979	2022-07-07	09:52:43	09:55:13	14	14		14	12	11	30	0
LVC104	1	A	1	297.608	2022-08-08	15:07:14	15:09:44	16	16		16	15	14	27	0
LVC104	1	A	2	314.529	2022-08-08	15:10:39	15:13:10	16	16		16	15	14	27	0
LVC104	1	A	3	220.295	2022-08-08	15:14:11	15:16:42	16	16		16	15	14	27	0
LVC104	1	B	1	231.819	2022-08-08	15:17:41	15:20:11	15	15		14	13	13	36	0
LVC104	1	B	2	146.925	2022-08-08	15:20:56	15:23:26	15	15		14	13	13	36	0
LVC104	1	B	3	182.799	2022-08-08	15:24:05	15:26:36	15	15		14	13	13	36	0
LVC104	1	C	1	971.111	2022-08-08	15:27:43	15:30:14	15	15		14	13	12	36	0
LVC104	1	C	2	306.907	2022-08-08	15:31:08	15:33:39	15	15		14	13	12	36	0
LVC104	1	C	3	506.304	2022-08-08	15:35:07	15:37:38	15	15		14	13	12	36	0
LVC104	1	A	1	242.044	2022-09-09	13:08:32	13:11:02	9	10		12	12	13	21	0
LVC104	1	A	2	229.136	2022-09-09	13:11:49	13:14:19	9	10		12	12	13	21	0
LVC104	1	A	3	115.995	2022-09-09	13:14:54	13:17:25	9	10		12	12	13	21	0
LVC104	1	B	1	196.157	2022-09-09	13:18:13	13:20:43	8	9		11	11	11	23	0
LVC104	1	B	2	133.087	2022-09-09	13:21:24	13:23:54	8	9		11	11	11	23	0
LVC104	1	B	3	123.166	2022-09-09	13:24:44	13:27:15	8	9		11	11	11	23	0
LVC104	1	C	1	172.975	2022-09-09	13:28:11	13:30:41	9	9		10	11	11	31	0
LVC104	1	C	2	214.51	2022-09-09	13:31:22	13:33:52	9	9		10	11	11	31	0
LVC104	1	C	3	371.298	2022-09-09	13:34:29	13:37:00	9	9		10	11	11	31	0
LVC104	1	A	1	179.183	2022-10-10	09:16:56	09:19:26	7	9		10	9	11	23	0
LVC104	1	A	2	229.92	2022-10-10	09:20:22	09:22:52	7	9		10	9	11	23	0
LVC104	1	A	3	130.056	2022-10-10	09:23:37	09:26:07	7	9		10	9	11	23	0
LVC104	1	B	1	134.352	2022-10-10	09:27:02	09:29:32	7	9		9	9	10	39	0
LVC104	1	B	2	134.581	2022-10-10	09:30:24	09:32:54	7	9		9	9	10	39	0
LVC104	1	B	3	104.738	2022-10-10	09:33:53	09:36:23	7	9		9	9	10	39	0
LVC104	1	C	1	175.976	2022-10-10	09:37:19	09:39:49	8	9		10	9	10	35	0
LVC104	1	C	2	362.112	2022-10-10	09:40:40	09:43:10	8	9		10	9	10	35	0
LVC104	1	C	3	254.793	2022-10-10	09:43:59	09:46:29	8	9		10	9	10	35	0
LVC104	1	A	1	173.667	2022-11-09	09:47:20	09:49:51	9	9		9	9	9	33	0
LVC104	1	A	2	137.985	2022-11-09	09:50:39	09:53:09	9	9		9	9	9	33	0
LVC104	1	A	3	105.099	2022-11-09	09:53:56	09:56:26	9	9		9	9	9	33	0
LVC104	1	B	1	116.255	2022-11-09	09:57:22	09:59:53	8	9		8	8	9	56	0
LVC104	1	B	2	82.804	2022-11-09	10:00:43	10:03:13	8	9		8	8	9	56	0
LVC104	1	B	3	72.5964	2022-11-09	10:04:00	10:06:30	8	9		8	8	9	56	0
LVC104	1	C	1	258.953	2022-11-09	10:08:00	10:10:30	8	9		8	8	9	58	0
LVC104	1	C	2	234.734	2022-11-09	10:11:14	10:13:45	8	9		8	8	9	58	0
LVC104	1	C	3	224.715	2022-11-09	10:14:43	10:17:13	8	9		8	8	9	58	0
LVC105	1	A	1	147.243	2022-05-13	09:54:14	09:57:11	8	7		8	6	6	28	-29
LVC105	1	A	2	179.908	2022-05-13	09:57:59	10:00:30	8	7		8	6	6	28	-29
LVC105	1	A	3	141.687	2022-05-13	10:01:22	10:03:52	8	7		8	6	6	28	-29
LVC105	1	B	1	204.488	2022-05-13	10:05:07	10:07:37	8	8		8	6	5	32	-37
LVC105	1	B	2	117.172	2022-05-13	10:08:29	10:10:59	8	8		8	6	5	32	-37
LVC105	1	B	3	144.25	2022-05-13	10:11:51	10:14:21	8	8		8	6	5	32	-37
LVC105	1	C	1	112.52	2022-05-13	10:15:43	10:18:13	7	7		8	6	5	95	-18
LVC105	1	C	2	172.123	2022-05-13	10:19:03	10:21:34	7	7		8	6	5	95	-18
LVC105	1	C	3	84.6133	2022-05-13	10:22:20	10:24:50	7	7		8	6	5	95	-18
LVC105	1	A	1	177.224	2022-06-08	10:49:11	10:51:41	14	12		14	10	9	33	-25
LVC105	1	A	2	178.771	2022-06-08	10:52:29	10:54:59	14	12		14	10	9	33	-25
LVC105	1	A	3	125.251	2022-06-08	10:55:46	10:58:17	14	12		14	10	9	33	-25
LVC105	1	B	1	316.195	2022-06-08	10:59:31	11:02:01	13	12		13	9	8	34	-32
LVC105	1	B	2	183.39	2022-06-08	11:02:47	11:05:18	13	12		13	9	8	34	-32
LVC105	1	B	3	253.55	2022-06-08	11:06:01	11:08:32	13	12		13	9	8	34	-32
LVC105	1	C	1	228.526	2022-06-08	11:09:56	11:12:27	13	12		13	10	9	96	-17
LVC105	1	C	2	240.255	2022-06-08	11:13:20	11:15:51	13	12		13	10	9	96	-17
LVC105	1	C	3	168.757	2022-06-08	11:16:50	11:19:21	13	12		13	10	9	96	-17
LVC105	1	A	1	185.927	2021-05-13	11:20:14	11:22:44		9		7	6	6	27	-26
LVC105	1	A	2	130.556	2021-05-13	11:23:22	11:25:52		9		7	6	6	27	-26
LVC105	1	A	3	90.2899	2021-05-13	11:26:34	11:29:04		9		7	6	6	27	-26
LVC105	1	B	1	204.596	2021-05-13	11:31:50	11:34:20		9		7	6	6	32	-33
LVC105	1	B	2	153.922	2021-05-13	11:34:55	11:37:25		9		7	6	6	32	-33
LVC105	1	B	3	203.763	2021-05-13	11:38:00	11:40:30		9		7	6	6	32	-33
LVC105	1	C	1	255.279	2021-05-13	11:44:09	11:46:39		9		8	7	7	46	-12
LVC105	1	C	2	327.16	2021-05-13	11:47:14	11:49:44		9		8	7	7	46	-12
LVC105	1	C	3	133.975	2021-05-13	11:50:21	11:52:51		9		8	7	7	46	-12
LVC105	1	A	1	105.492	2021-06-09	10:53:18	10:55:48		13		12	10	10	22	-27
LVC105	1	A	2	36.5718	2021-06-09	10:56:21	10:58:51		13		12	10	10	22	-27
LVC105	1	A	3	96.8013	2021-06-09	10:59:17	11:01:47		13		12	10	10	22	-27
LVC105	1	B	1	74.4174	2021-06-09	11:03:43	11:06:12		14		12	10	10	32	-36
LVC105	1	B	2	120.23	2021-06-09	11:06:35	11:09:05		14		12	10	10	32	-36
LVC105	1	B	3	37.4882	2021-06-09	11:09:45	11:12:15		14		12	10	10	32	-36
LVC105	1	C	1	142.342	2021-06-09	11:13:58	11:16:28		13		12	11	10	61	-13
LVC105	1	C	2	44.4452	2021-06-09	11:17:00	11:19:30		13		12	11	10	61	-13
LVC105	1	C	3	78.9593	2021-06-09	11:19:54	11:22:23		13		12	11	10	61	-13
LVC105	1	A	1	424.301	2021-07-13	11:30:04	11:32:34		20		18	16	15	31	-58
LVC105	1	A	2	349.567	2021-07-13	11:33:08	11:35:38		20		18	16	15	31	-58
LVC105	1	A	3	284.75	2021-07-13	11:37:00	11:39:30		20		18	16	15	31	-58
LVC105	1	B	1	804.978	2021-07-13	11:40:54	11:43:24		19		17	15	14	23	-65
LVC105	1	B	2	493.676	2021-07-13	11:44:01	11:46:31		19		17	15	14	23	-65
LVC105	1	B	3	755.804	2021-07-13	11:47:21	11:49:51		19		17	15	14	23	-65
LVC105	1	C	1	786.254	2021-07-13	11:51:11	11:53:41		19		18	16	15	34	-47
LVC105	1	C	2	664.932	2021-07-13	11:54:28	11:56:58		19		18	16	15	34	-47
LVC105	1	C	3	422.587	2021-07-13	11:57:39	12:00:09		19		18	16	15	34	-47
LVC105	1	A	1	412.959	2021-08-11	10:45:54	10:48:23		16		16	15	15	25	-55
LVC105	1	A	2	260.173	2021-08-11	10:49:18	10:51:48		16		16	15	15	25	-55
LVC105	1	A	3	238.083	2021-08-11	10:52:30	10:55:00		16		16	15	15	25	-55
LVC105	1	B	1	668.569	2021-08-11	10:57:04	10:59:34		16		16	15	14	23	-59
LVC105	1	B	2	469.044	2021-08-11	11:00:34	11:03:03		16		16	15	14	23	-59
LVC105	1	B	3	556.588	2021-08-11	11:03:51	11:06:21		16		16	15	14	23	-59
LVC105	1	C	1	609.201	2021-08-11	11:08:52	11:11:22		17		17	16	16	42	-25
LVC105	1	C	2	635.385	2021-08-11	11:12:04	11:14:33		17		17	16	16	42	-25
LVC105	1	C	3	363.811	2021-08-11	11:15:23	11:17:53		17		17	16	16	42	-25
LVC105	1	A	1	348.306	2021-09-13	11:07:33	11:10:02		16		16	15	15	25	-55
LVC105	1	A	2	220.522	2021-09-13	11:10:45	11:13:14		16		16	15	15	25	-55
LVC105	1	A	3	218.22	2021-09-13	11:13:49	11:16:19		16		16	15	15	25	-55
LVC105	1	B	1	587.417	2021-09-13	11:17:55	11:20:25		16		16	15	15	23	-59
LVC105	1	B	2	327.481	2021-09-13	11:21:30	11:23:59		16		16	15	15	23	-59
LVC105	1	B	3	466.84	2021-09-13	11:24:47	11:27:16		16		16	15	15	23	-59
LVC105	1	C	1	443.365	2021-09-13	11:28:13	11:30:43		17		17	16	16	42	-25
LVC105	1	C	2	428.57	2021-09-13	11:31:23	11:33:53		17		17	16	16	42	-25
LVC105	1	C	3	319.905	2021-09-13	11:34:34	11:37:03		17		17	16	16	42	-25
LVC105	1	A	1	161.199	2021-10-12	11:21:43	11:24:12		7		8	9	10	14	-61
LVC105	1	A	2	88.9089	2021-10-12	11:24:54	11:27:24		7		8	9	10	14	-61
LVC105	1	A	3	74.5602	2021-10-12	11:28:07	11:30:36		7		8	9	10	14	-61
LVC105	1	B	1	172.919	2021-10-12	11:31:30	11:34:00		6		9	9	10	22	-60
LVC105	1	B	2	148.388	2021-10-12	11:34:47	11:37:17		6		9	9	10	22	-60
LVC105	1	B	3	217.146	2021-10-12	11:37:55	11:40:24		6		9	9	10	22	-60
LVC105	1	C	1	180.659	2021-10-12	11:41:20	11:43:50		7		9	9	10	46	-45
LVC105	1	C	2	190.272	2021-10-12	11:44:47	11:47:16		7		9	9	10	46	-45
LVC105	1	C	3	126.602	2021-10-12	11:48:25	11:50:54		7		9	9	10	46	-45
LVC105	1	A	1	106.564	2021-04-09	11:30:35	11:33:05		2		2	2	2		-16
LVC105	1	A	2	75.9984	2021-04-09	11:33:55	11:36:24		2		2	2	2		-16
LVC105	1	A	3	65.9356	2021-04-09	11:37:02	11:39:31		2		2	2	2		-16
LVC105	1	B	1	100.135	2021-04-09	11:43:51	11:46:21		2		2	3	3		-25
LVC105	1	B	2	64.9952	2021-04-09	11:48:08	11:50:37		2		2	3	3		-25
LVC105	1	B	3	90.3634	2021-04-09	11:51:48	11:54:18		2		2	3	3		-25
LVC105	1	C	1	164.924	2021-04-09	11:58:39	12:01:09		2		2	2	3		-9
LVC105	1	C	2	132.131	2021-04-09	12:02:12	12:04:41		2		2	2	3		-9
LVC105	1	C	3	70.0904	2021-04-09	12:05:44	12:08:39		1		2	2	3		-9
LVC105	1	A	1	536.975	2022-07-08	09:40:34	09:43:04	14	15		14	14	13	36	0
LVC105	1	A	2	278.263	2022-07-08	09:43:53	09:46:23	14	15		14	14	13	36	0
LVC105	1	A	3	222.255	2022-07-08	09:47:07	09:49:38	14	15		14	14	13	36	0
LVC105	1	B	1	552.919	2022-07-08	09:50:47	09:53:36	14	14		14	13	13	34	0
LVC105	1	B	2	826.511	2022-07-08	09:54:15	09:56:45	14	14		14	13	13	34	0
LVC105	1	B	3	509.269	2022-07-08	09:57:39	10:00:09	14	14		14	13	13	34	0
LVC105	1	C	1	454.454	2022-07-08	10:01:32	10:04:02	15	15		15	14	13	94	0
LVC105	1	C	2	568.42	2022-07-08	10:05:24	10:07:54	15	15		15	14	13	94	0
LVC105	1	C	3	326.652	2022-07-08	10:08:46	10:11:16	15	15		15	14	13	94	0
LVC105	1	A	1	616.769	2022-08-11	11:10:35	11:13:06	15	15		15	14	13	29	0
LVC105	1	A	2	340.175	2022-08-11	11:14:05	11:16:36	15	15		15	14	13	29	0
LVC105	1	A	3	250.626	2022-08-11	11:17:19	11:19:49	15	15		15	14	13	29	0
LVC105	1	B	1	640.975	2022-08-11	11:20:52	11:23:22	14	15		15	14	14	9	0
LVC105	1	B	2	526.813	2022-08-11	11:24:07	11:26:37	14	15		15	14	14	9	0
LVC105	1	B	3	684.991	2022-08-11	11:27:23	11:29:54	14	15		15	14	14	9	0
LVC105	1	C	1	502.665	2022-08-11	11:31:09	11:33:40	15	15		15	15	14	92	0
LVC105	1	C	2	343.02	2022-08-11	11:34:38	11:37:09	15	15		15	15	14	92	0
LVC105	1	C	3	409.871	2022-08-11	11:37:59	11:40:29	15	15		15	15	14	92	0
LVC105	1	A	1	442.363	2022-09-13	09:36:18	09:38:49	11	12		12	12	12	21	0
LVC105	1	A	2	0	2022-09-13	09:38:33	09:42:03	11	12		12	12	12	21	0
LVC105	1	A	3	162.534	2022-09-13	09:42:50	09:45:30	11	12		12	12	12	21	0
LVC105	1	B	1	424.953	2022-09-13	09:46:25	09:48:55	10	12		12	12	12	20	0
LVC105	1	B	2	328.246	2022-09-13	09:50:08	09:52:39	10	12		12	12	12	20	0
LVC105	1	B	3	423.169	2022-09-13	09:53:25	09:55:55	10	12		12	12	12	20	0
LVC105	1	C	1	346.608	2022-09-13	09:57:15	09:59:45	11	12		12	13	13	74	0
LVC105	1	C	2	363.04	2022-09-13	10:01:02	10:03:32	11	12		12	13	13	74	0
LVC105	1	C	3	264.129	2022-09-13	10:04:19	10:06:49	11	12		12	13	13	74	0
LVC105	1	A	1	289.244	2022-10-13	12:11:10	12:13:41	7	8		10	10	10	34	0
LVC105	1	A	2	135.94	2022-10-13	12:14:28	12:16:58	7	8		10	10	10	34	0
LVC105	1	A	3	114.802	2022-10-13	12:17:42	12:20:12	7	8		10	10	10	34	0
LVC105	1	B	1	250.646	2022-10-13	12:21:25	12:23:55	6	8		10	10	11	26	0
LVC105	1	B	2	234.741	2022-10-13	12:24:44	12:27:14	6	8		10	10	11	26	0
LVC105	1	B	3	247.469	2022-10-13	12:28:12	12:30:42	6	8		10	10	11	26	0
LVC105	1	C	1	223.236	2022-10-13	12:32:02	12:34:32	7	8		9	10	11	15	0
LVC105	1	C	2	197.385	2022-10-13	12:35:39	12:38:09	7	8		9	10	11	15	0
LVC105	1	C	3	197.725	2022-10-13	12:39:04	12:41:35	7	8		9	10	11	15	0
LVC105	1	A	1	243.429	2022-11-10	09:49:22	09:51:52	8	9		9	9	9	37	0
LVC105	1	A	2	123.381	2022-11-10	09:52:36	09:55:07	8	9		9	9	9	37	0
LVC105	1	A	3	94.5475	2022-11-10	09:56:02	09:58:32	8	9		9	9	9	37	0
LVC105	1	B	1	286.524	2022-11-10	10:00:20	10:02:50	8	9		9	9	10	78	0
LVC105	1	B	2	226.907	2022-11-10	10:04:09	10:06:39	8	9		9	9	10	78	0
LVC105	1	B	3	180.906	2022-11-10	10:07:43	10:10:13	8	9		9	9	10	78	0
LVC105	1	C	1	147.43	2022-11-10	10:12:26	10:14:56	8	9		9	9	9	95	0
LVC105	1	C	2	160.947	2022-11-10	10:15:58	10:18:28	8	9		9	9	9	95	0
LVC105	1	C	3	191.639	2022-11-10	10:19:14	10:21:44	8	9		9	9	9	95	0
LVC106	1	A	1	190.468	2022-05-13	12:09:45	12:12:16	8	8		9	7	6	86	-34
LVC106	1	A	2	194.909	2022-05-13	12:12:59	12:15:29	8	8		9	7	6	86	-34
LVC106	1	A	3	105.95	2022-05-13	12:16:11	12:18:41	8	8		9	7	6	86	-34
LVC106	1	B	1	148.793	2022-05-13	12:19:34	12:22:04	8	8		9	6	6	29	-40
LVC106	1	B	2	138.205	2022-05-13	12:22:44	12:25:14	8	8		9	6	6	29	-40
LVC106	1	B	3	126.336	2022-05-13	12:26:02	12:28:32	8	8		9	6	6	29	-40
LVC106	1	C	1	144.494	2022-05-13	12:29:43	12:32:13	8	8		9	6	5	37	-42
LVC106	1	C	2	172.27	2022-05-13	12:32:52	12:35:23	8	8		9	6	5	37	-42
LVC106	1	C	3	83.6391	2022-05-13	12:36:07	12:38:37	8	8		9	6	5	37	-42
LVC106	1	A	1	380.726	2022-06-08	13:22:55	13:25:25	14	13		14	10	9	72	-29
LVC106	1	A	2	389.051	2022-06-08	13:26:20	13:28:50	14	13		14	10	9	72	-29
LVC106	1	A	3	207.594	2022-06-08	13:29:51	13:32:21	14	13		14	10	9	72	-29
LVC106	1	B	1	333.993	2022-06-08	13:34:42	13:37:13	13	12		13	9	9	65	-33
LVC106	1	B	2	279.408	2022-06-08	13:37:58	13:40:29	13	12		13	9	9	65	-33
LVC106	1	B	3	273.327	2022-06-08	13:41:19	13:43:49	13	12		13	9	9	65	-33
LVC106	1	C	1	274.145	2022-06-08	13:45:07	13:47:38	15	13		14	10	9	35	-33
LVC106	1	C	2	296.737	2022-06-08	13:48:18	13:50:48	15	13		14	10	9	35	-33
LVC106	1	C	3	208.619	2022-06-08	13:51:31	13:54:01	15	13		14	10	9	35	-33
LVC106	1	A	1	512.529	2022-07-08	12:39:23	12:41:56	15	15		15	14	13	79	-34
LVC106	1	A	2	483.557	2022-07-08	12:42:46	12:45:17	15	15		15	14	13	79	-34
LVC106	1	A	3	268.069	2022-07-08	12:46:12	12:48:43	15	15		15	14	13	79	-34
LVC106	1	B	1	452.318	2022-07-08	12:49:46	12:52:17	16	15		15	15	14	24	-48
LVC106	1	B	2	365.278	2022-07-08	12:52:46	12:55:16	16	15		15	15	14	24	-48
LVC106	1	B	3	325.994	2022-07-08	12:56:06	12:58:36	16	15		15	15	14	24	-48
LVC106	1	C	1	498.311	2022-07-08	12:59:40	13:02:10	15	15		14	14	13	34	-48
LVC106	1	C	2	300.095	2022-07-08	13:02:56	13:05:27	15	15		14	14	13	34	-48
LVC106	1	C	3	304.858	2022-07-08	13:06:18	13:08:49	15	15		14	14	13	34	-48
LVC106	1	A	1	695.632	2022-08-11	14:28:01	14:30:31	16	16		15	14	14	9	-45
LVC106	1	A	2	487.08	2022-08-11	14:31:20	14:33:50	16	16		15	14	14	9	-45
LVC106	1	A	3	273.329	2022-08-11	14:34:53	14:37:23	16	16		15	14	14	9	-45
LVC106	1	B	1	455.481	2022-08-11	14:38:33	14:41:03	17	16		15	15	14	5	-53
LVC106	1	B	2	404.139	2022-08-11	14:41:53	14:44:23	17	16		15	15	14	5	-53
LVC106	1	B	3	317.74	2022-08-11	14:45:06	14:47:37	17	16		15	15	14	5	-53
LVC106	1	C	1	549.304	2022-08-11	14:48:44	14:51:15	17	16		15	15	14	11	-53
LVC106	1	C	2	612.173	2022-08-11	14:52:00	14:54:31	17	16		15	15	14	11	-53
LVC106	1	C	3	320.324	2022-08-11	14:55:12	14:57:42	17	16		15	15	14	11	-53
LVC106	1	A	1	476.794	2022-09-13	12:10:37	12:13:07	11	12		12	12	13	66	-79
LVC106	1	A	2	363.225	2022-09-13	12:13:51	12:16:22	11	12		12	12	13	66	-79
LVC106	1	A	3	205.798	2022-09-13	12:17:00	12:19:30	11	12		12	12	13	66	-79
LVC106	1	B	1	302.079	2022-09-13	12:20:36	12:23:06	12	12		13	13	13	14	-87
LVC106	1	B	2	226.501	2022-09-13	12:24:03	12:26:33	12	12		13	13	13	14	-87
LVC106	1	B	3	185.619	2022-09-13	12:27:16	12:29:46	12	12		13	13	13	14	-87
LVC106	1	C	1	314.113	2022-09-13	12:30:53	12:33:23	11	12		12	12	13	17	-88
LVC106	1	C	2	241.75	2022-09-13	12:34:18	12:36:48	11	12		12	12	13	17	-88
LVC106	1	C	3	192.245	2022-09-13	12:37:34	12:40:05	11	12		12	12	13	17	-88
LVC106	1	A	1	173.156	2022-10-13	09:47:38	09:50:08	6	8		9	10	10	38	-64
LVC106	1	A	2	328.726	2022-10-13	09:51:00	09:53:30	6	8		9	10	10	38	-64
LVC106	1	A	3	275.818	2022-10-13	09:54:20	09:56:50	6	8		9	10	10	38	-64
LVC106	1	B	1	147.007	2022-10-13	09:57:55	10:00:25	6	8		10	11	11	33	-73
LVC106	1	B	2	143.242	2022-10-13	10:01:09	10:03:39	6	8		10	11	11	33	-73
LVC106	1	B	3	86.8354	2022-10-13	10:04:19	10:06:49	6	8		10	11	11	33	-73
LVC106	1	C	1	242.8	2022-10-13	10:08:05	10:10:35	5	8		9	10	11	29	-64
LVC106	1	C	2	120.545	2022-10-13	10:11:23	10:13:53	5	8		9	10	11	29	-64
LVC106	1	C	3	121.699	2022-10-13	10:14:35	10:17:06	5	8		9	10	11	29	-64
LVC106	1	A	1	267.765	2022-11-10	10:56:00	10:58:30	8	9		9	9	9	87	-50
LVC106	1	A	2	288.819	2022-11-10	10:59:29	11:01:59	8	9		9	9	9	87	-50
LVC106	1	A	3	178.924	2022-11-10	11:02:49	11:05:20	8	9		9	9	9	87	-50
LVC106	1	B	1	154.219	2022-11-10	11:06:20	11:08:50	9	9		9	10	10	47	-54
LVC106	1	B	2	130.923	2022-11-10	11:10:18	11:12:48	9	9		9	10	10	47	-54
LVC106	1	B	3	95.5857	2022-11-10	11:13:35	11:16:05	9	9		9	10	10	47	-54
LVC106	1	C	1	146.102	2022-11-10	11:17:24	11:19:54	9	9		9	9	10	42	-50
LVC106	1	C	2	104.766	2022-11-10	11:20:42	11:23:12	9	9		9	9	10	42	-50
LVC106	1	C	3	110.978	2022-11-10	11:23:57	11:26:27	9	9		9	9	10	42	-50
LVC106	1	A	1	226.069	2021-05-13	13:30:08	13:32:38		11		9	7	7		-28
LVC106	1	A	2	200.305	2021-05-13	13:33:37	13:36:07		11		9	7	7		-28
LVC106	1	A	3	126.173	2021-05-13	13:36:54	13:39:24		11		9	7	7		-28
LVC106	1	B	1	167.048	2021-05-13	13:42:08	13:44:38		10		8	7	7		-32
LVC106	1	B	2	187.161	2021-05-13	13:45:26	13:47:56		10		8	7	7		-32
LVC106	1	B	3	156.912	2021-05-13	13:48:28	13:50:58		10		8	7	7		-32
LVC106	1	C	1	175.999	2021-05-13	13:53:36	13:56:06		10		8	7	6		-36
LVC106	1	C	2	224.914	2021-05-13	13:56:44	13:59:14		10		8	7	6		-36
LVC106	1	C	3	217.925	2021-05-13	14:00:04	14:02:34		10		8	7	6		-36
LVC106	1	A	1	1207.63	2021-06-09	13:30:30	13:33:00		14		13	11	10	42	-32
LVC106	1	A	2	387.575	2021-06-09	13:33:38	13:36:08		14		13	11	10	42	-32
LVC106	1	A	3	338.947	2021-06-09	13:36:45	13:39:15		14		13	11	10	42	-32
LVC106	1	B	1	345.428	2021-06-09	13:41:01	13:43:30		14		12	11	10	31	-37
LVC106	1	B	2	366.776	2021-06-09	13:44:14	13:46:44		14		12	11	10	31	-37
LVC106	1	B	3	255.691	2021-06-09	13:47:23	13:49:53		14		12	11	10	31	-37
LVC106	1	C	1	415.654	2021-06-09	13:51:52	13:54:21		15		12	11	10	31	-36
LVC106	1	C	2	444.539	2021-06-09	13:54:54	13:57:24		15		12	11	10	31	-36
LVC106	1	C	3	266.308	2021-06-09	13:58:04	14:00:34		15		12	11	10	31	-36
LVC106	1	A	1	730.986	2021-07-13	13:57:03	13:59:33		20		18	16	15	35	-69
LVC106	1	A	2	454.481	2021-07-13	14:00:19	14:02:49		20		18	16	15	35	-69
LVC106	1	A	3	437.104	2021-07-13	14:03:33	14:06:03		20		18	16	15	35	-69
LVC106	1	B	1	570.341	2021-07-13	14:08:43	14:11:13		20		18	16	15	11	-73
LVC106	1	B	2	597.72	2021-07-13	14:12:23	14:14:52		20		18	16	15	11	-73
LVC106	1	B	3	406.178	2021-07-13	14:15:45	14:18:15		20		18	16	15	11	-73
LVC106	1	C	1	576.53	2021-07-13	14:20:09	14:22:39		20		17	15	14	18	-82
LVC106	1	C	2	811.255	2021-07-13	14:23:20	14:25:50		20		17	15	14	18	-82
LVC106	1	C	3	561.065	2021-07-13	14:26:34	14:29:04		20		17	15	14	18	-82
LVC106	1	A	1	622.011	2021-08-11	12:59:52	13:02:22		17		16	16	15	35	-54
LVC106	1	A	2	397.517	2021-08-11	13:03:08	13:05:38		17		16	16	15	35	-54
LVC106	1	A	3	440.779	2021-08-11	13:06:37	13:09:07		17		16	16	15	35	-54
LVC106	1	B	1	580.068	2021-08-11	13:10:59	13:13:28		17		17	16	16	15	-62
LVC106	1	B	2	406.436	2021-08-11	13:13:52	13:16:21		17		17	16	16	15	-62
LVC106	1	B	3	414.088	2021-08-11	13:17:09	13:19:39		17		17	16	16	15	-62
LVC106	1	C	1	746.581	2021-08-11	13:21:29	13:23:59		17		16	16	15	23	-60
LVC106	1	C	2	567.328	2021-08-11	13:24:44	13:27:14		17		16	16	15	23	-60
LVC106	1	C	3	542.695	2021-08-11	13:27:57	13:30:27		17		16	16	15	23	-60
LVC106	1	A	1	774.558	2021-09-13	13:23:58	13:26:27		17		16	16	15	35	-54
LVC106	1	A	2	356.488	2021-09-13	13:27:07	13:29:37		17		16	16	15	35	-54
LVC106	1	A	3	386.132	2021-09-13	13:30:30	13:33:00		17		16	16	15	35	-54
LVC106	1	B	1	409.304	2021-09-13	13:35:33	13:38:03		17		17	16	16	15	-62
LVC106	1	B	2	320.496	2021-09-13	13:39:30	13:42:00		17		17	16	16	15	-62
LVC106	1	B	3	369.078	2021-09-13	13:42:56	13:45:25		17		17	16	16	15	-62
LVC106	1	C	1	453.278	2021-09-13	13:47:33	13:50:02		17		16	16	15	23	-60
LVC106	1	C	2	592.899	2021-09-13	13:51:02	13:53:31		17		16	16	15	23	-60
LVC106	1	C	3	334.716	2021-09-13	13:54:16	13:56:46		17		16	16	15	23	-60
LVC106	1	A	1	286.768	2021-10-12	13:38:06	13:40:36		7		9	9	10	30	-56
LVC106	1	A	2	169.303	2021-10-12	13:41:16	13:43:45		7		9	9	10	30	-56
LVC106	1	A	3	160.89	2021-10-12	13:44:19	13:46:49		7		9	9	10	30	-56
LVC106	1	B	1	161.815	2021-10-12	13:47:49	13:50:19		8		9	10	11	11	-66
LVC106	1	B	2	140.13	2021-10-12	13:50:59	13:53:28		8		9	10	11	11	-66
LVC106	1	B	3	154.874	2021-10-12	13:54:05	13:56:35		8		9	10	11	11	-66
LVC106	1	C	1	322.661	2021-10-12	13:57:43	14:00:13		7		9	10	10	13	-65
LVC106	1	C	2	270.833	2021-10-12	14:01:05	14:03:34		7		9	10	10	13	-65
LVC106	1	C	3	156.504	2021-10-12	14:04:13	14:06:43		7		9	10	10	13	-65
LVC106	1	A	1	123.033	2021-04-09	13:43:16	13:45:46		3		3	3	3		-23
LVC106	1	A	2	99.4531	2021-04-09	13:46:36	13:49:06		3		3	3	3		-23
LVC106	1	A	3	71.3384	2021-04-09	13:49:51	13:52:21		3		3	3	3		-23
LVC106	1	B	1	67.8689	2021-04-09	13:58:38	14:01:08		2		2	3	3		-24
LVC106	1	B	2	81.5243	2021-04-09	14:02:00	14:04:30		2		2	3	3		-24
LVC106	1	B	3	70.2744	2021-04-09	14:05:27	14:07:57		2		2	3	3		-24
LVC106	1	C	1	101.259	2021-04-09	14:15:54	14:18:24		2		2	3	3		-24
LVC106	1	C	2	115.142	2021-04-09	14:19:08	14:21:37		2		2	3	3		-24
LVC106	1	C	3	114.107	2021-04-09	14:24:10	14:27:30		2		2	3	3		-24
LVC107	1	A	1	97.8798	2022-05-11	08:11:26	08:13:56	7	7		8	6	6	26	-115
LVC107	1	A	2	81.4277	2022-05-11	08:14:52	08:17:22	7	7		8	6	6	26	-115
LVC107	1	A	3	63.4141	2022-05-11	08:18:15	08:20:46	7	7		8	6	6	26	-115
LVC107	1	B	1	56.2738	2022-05-11	08:21:44	08:24:15	7	6		7	6	6	31	-88
LVC107	1	B	2	28.0379	2022-05-11	08:25:10	08:27:40	7	6		7	6	6	31	-88
LVC107	1	B	3	24.0814	2022-05-11	08:28:29	08:30:59	7	6		7	6	6	31	-88
LVC107	1	C	1	46.7647	2022-05-11	08:32:16	08:34:46	7	7		7	6	6	29	-92
LVC107	1	C	2	52.7027	2022-05-11	08:35:32	08:38:03	7	7		7	6	6	29	-92
LVC107	1	C	3	32.0577	2022-05-11	08:38:53	08:41:23	7	7		7	6	6	29	-92
LVC107	1	A	1	123.408	2022-06-07	08:28:29	08:30:59	11	11		14	9	8	36	-108
LVC107	1	A	2	183.563	2022-06-07	08:32:09	08:34:39	11	11		14	9	8	36	-108
LVC107	1	A	3	92.4893	2022-06-07	08:35:39	08:38:09	11	11		14	9	8	36	-108
LVC107	1	B	1	68.3194	2022-06-07	08:39:11	08:41:41	10	10		11	8	8	27	-74
LVC107	1	B	2	49.8394	2022-06-07	08:42:37	08:45:07	10	10		11	8	8	27	-74
LVC107	1	B	3	56.1906	2022-06-07	08:46:06	08:48:37	10	10		11	8	8	27	-74
LVC107	1	C	1	90.7259	2022-06-07	08:49:39	08:52:10	11	11		11	9	8	34	56
LVC107	1	C	2	81.9946	2022-06-07	08:53:00	08:55:30	11	11		11	9	8	34	56
LVC107	1	C	3	79.2565	2022-06-07	08:56:10	08:58:40	11	11		11	9	8	34	56
LVC107	1	A	1	299.066	2022-07-13	13:58:06	14:00:36	16	15		13	12	11	34	-111
LVC107	1	A	2	295.74	2022-07-13	14:01:30	14:04:00	16	15		13	12	11	34	-111
LVC107	1	A	3	204.951	2022-07-13	14:04:51	14:07:21	16	15		13	12	11	34	-111
LVC107	1	B	1	98.6024	2022-07-13	14:08:27	14:10:57	15	14		13	12	12	34	-75
LVC107	1	B	2	79.8025	2022-07-13	14:11:38	14:14:09	15	14		13	12	12	34	-75
LVC107	1	B	3	94.5241	2022-07-13	14:14:52	14:17:22	15	14		13	12	12	34	-75
LVC107	1	C	1	205.381	2022-07-13	14:18:17	14:20:47	16	15		13	12	12	35	-82
LVC107	1	C	2	132.67	2022-07-13	14:21:36	14:24:06	16	15		13	12	12	35	-82
LVC107	1	C	3	115.189	2022-07-13	14:24:52	14:27:23	16	15		13	12	12	35	-82
LVC107	1	A	1	274.12	2022-08-09	09:41:56	09:44:27	13	14		13	12	12	26	-136
LVC107	1	A	2	274.409	2022-08-09	09:45:50	09:48:21	13	14		13	12	12	26	-136
LVC107	1	A	3	213.489	2022-08-09	09:49:12	09:51:42	13	14		13	12	12	26	-136
LVC107	1	B	1	103.641	2022-08-09	09:53:19	09:55:49	13	13		12	12	12	18	-131
LVC107	1	B	2	78.5934	2022-08-09	09:56:37	09:59:07	13	13		12	12	12	18	-131
LVC107	1	B	3	74.0687	2022-08-09	09:59:47	10:02:18	13	13		12	12	12	18	-131
LVC107	1	C	1	188.124	2022-08-09	10:03:25	10:05:56	14	13		13	12	12	20	-135
LVC107	1	C	2	145.663	2022-08-09	10:06:45	10:09:15	14	13		13	12	12	20	-135
LVC107	1	C	3	110.801	2022-08-09	10:10:04	10:12:34	14	13		13	12	12	20	-135
LVC107	1	A	1	180.058	2022-09-08	08:15:51	08:18:21	9	10		11	11	11	30	-136
LVC107	1	A	2	292.311	2022-09-08	08:19:07	08:21:37	9	10		11	11	11	30	-136
LVC107	1	A	3	162.544	2022-09-08	08:22:17	08:24:47	9	10		11	11	11	30	-136
LVC107	1	B	1	97.2774	2022-09-08	08:26:12	08:28:42	9	10		11	11	11	24	-135
LVC107	1	B	2	93.9559	2022-09-08	08:29:34	08:32:05	9	10		11	11	11	24	-135
LVC107	1	B	3	72.0307	2022-09-08	08:32:46	08:35:16	9	10		11	11	11	24	-135
LVC107	1	C	1	161.625	2022-09-08	08:36:15	08:38:45	9	10		12	11	11	19	-137
LVC107	1	C	2	116.29	2022-09-08	08:39:25	08:41:55	9	10		12	11	11	19	-137
LVC107	1	C	3	68.4121	2022-09-08	08:42:40	08:45:10	9	10		12	11	11	19	-137
LVC107	1	A	1	121.697	2022-10-11	08:31:02	08:33:32	8	9		10	10	10	19	-138
LVC107	1	A	2	171.129	2022-10-11	08:34:22	08:36:52	8	9		10	10	10	19	-138
LVC107	1	A	3	115.886	2022-10-11	08:38:02	08:40:33	8	9		10	10	10	19	-138
LVC107	1	B	1	48.7544	2022-10-11	08:41:28	08:43:58	8	9		10	10	10	17	-137
LVC107	1	B	2	46.8673	2022-10-11	08:45:25	08:47:55	8	9		10	10	10	17	-137
LVC107	1	B	3	44.4767	2022-10-11	08:49:10	08:51:40	8	9		10	10	10	17	-137
LVC107	1	C	1	106.127	2022-10-11	08:52:37	08:55:07	8	9		10	10	10	13	-146
LVC107	1	C	2	82.7507	2022-10-11	08:55:54	08:58:24	8	9		10	10	10	13	-146
LVC107	1	C	3	55.1672	2022-10-11	08:59:08	09:01:39	8	9		10	10	10	13	-146
LVC107	1	A	1	93.9102	2022-11-11	08:33:05	08:35:35	9	9		9	9	9	12	-137
LVC107	1	A	2	178.206	2022-11-11	08:36:21	08:38:51	9	9		9	9	9	12	-137
LVC107	1	A	3	100.065	2022-11-11	08:39:50	08:42:20	9	9		9	9	9	12	-137
LVC107	1	B	1	59.1528	2022-11-11	08:43:49	08:46:19	9	9		9	9	9	35	-139
LVC107	1	B	2	61.0034	2022-11-11	08:47:01	08:49:31	9	9		9	9	9	35	-139
LVC107	1	B	3	53.1165	2022-11-11	08:50:19	08:52:49	9	9		9	9	9	35	-139
LVC107	1	C	1	85.705	2022-11-11	08:53:42	08:56:12	9	9		9	10	9	30	-137
LVC107	1	C	2	62.4832	2022-11-11	08:56:54	08:59:25	9	9		9	10	9	30	-137
LVC107	1	C	3	47.4909	2022-11-11	09:00:08	09:02:38	9	9		9	10	9	30	-137
LVC107	1	A	1	118.56	2021-05-11	10:36:59	10:39:29		10		10	6	6	30	-114
LVC107	1	A	2	182.521	2021-05-11	10:40:08	10:42:38		10		10	6	6	30	-114
LVC107	1	A	3	95.6246	2021-05-11	10:43:39	10:46:09		10		10	6	6	30	-114
LVC107	1	B	1	123.817	2021-05-11	10:48:32	10:51:02		9		9	6	6	41	-85
LVC107	1	B	2	73.6992	2021-05-11	10:51:57	10:54:26		9		9	6	6	41	-85
LVC107	1	B	3	74.8865	2021-05-11	10:55:06	10:57:36		9		9	6	6	41	-85
LVC107	1	C	1	102.268	2021-05-11	11:00:18	11:02:48		11		11	6	6	18	-90
LVC107	1	C	2	84.1334	2021-05-11	11:03:43	11:06:13		11		11	6	6	18	-90
LVC107	1	C	3	64.4084	2021-05-11	11:07:43	11:10:13		11		11	6	6	18	-90
LVC107	1	A	1	163.435	2021-06-08	09:58:42	10:01:12		13		11	9	9	21	-129
LVC107	1	A	2	231.799	2021-06-08	10:02:11	10:04:41		13		11	9	9	21	-129
LVC107	1	A	3	127.124	2021-06-08	10:05:21	10:07:51		13		11	9	9	21	-129
LVC107	1	B	1	110.058	2021-06-08	10:09:50	10:12:19		12		10	9	9	23	-101
LVC107	1	B	2	89.6826	2021-06-08	10:12:51	10:15:21		12		10	9	9	23	-101
LVC107	1	B	3	75.2799	2021-06-08	10:15:43	10:18:13		12		10	9	9	23	-101
LVC107	1	C	1	124.784	2021-06-08	10:19:49	10:22:19		13		10	9	9	12	-105
LVC107	1	C	2	93.4106	2021-06-08	10:22:40	10:25:10		13		10	9	9	12	-105
LVC107	1	C	3	87.6066	2021-06-08	10:25:39	10:28:09		13		10	9	9	12	-105
LVC107	1	A	1	249.033	2021-07-09	10:07:01	10:09:31		18		15	13	12	20	-132
LVC107	1	A	2	300.029	2021-07-09	10:10:34	10:13:04		18		15	13	12	20	-132
LVC107	1	A	3	190.338	2021-07-09	10:13:48	10:16:18		18		15	13	12	20	-132
LVC107	1	B	1	170.953	2021-07-09	10:17:19	10:19:48		17		13	12	12	12	-135
LVC107	1	B	2	154.807	2021-07-09	10:20:29	10:22:59		17		13	12	12	12	-135
LVC107	1	B	3	115.771	2021-07-09	10:23:54	10:26:24		17		13	12	12	12	-135
LVC107	1	C	1	176.034	2021-07-09	10:27:19	10:29:49		18		14	13	13	11	-133
LVC107	1	C	2	173.677	2021-07-09	10:32:15	10:34:45		18		14	13	13	11	-133
LVC107	1	C	3	148.003	2021-07-09	10:35:29	10:37:59		18		14	13	13	11	-133
LVC107	1	A	1	257.442	2021-08-10	09:30:18	09:32:48		14		13	13	12	30	-132
LVC107	1	A	2	286.846	2021-08-10	09:33:48	09:36:18		14		13	13	12	30	-132
LVC107	1	A	3	210.616	2021-08-10	09:37:15	09:39:45		14		13	13	12	30	-132
LVC107	1	B	1	251.379	2021-08-10	09:41:47	09:44:17		13		13	12	12	27	-135
LVC107	1	B	2	127.154	2021-08-10	09:45:05	09:47:35		13		13	12	12	27	-135
LVC107	1	B	3	117.743	2021-08-10	09:48:31	09:51:00		13		13	12	12	27	-135
LVC107	1	C	1	300.32	2021-08-10	09:52:48	09:55:18		14		13	13	12	34	-135
LVC107	1	C	2	202.095	2021-08-10	09:56:10	09:58:40		14		13	13	12	34	-135
LVC107	1	C	3	176.452	2021-08-10	09:59:37	10:02:06		14		13	13	12	34	-135
LVC107	1	A	1	237.908	2021-09-09	09:04:10	09:06:39		14		13	13	12	30	-132
LVC107	1	A	2	253.043	2021-09-09	09:07:40	09:10:10		14		13	13	12	30	-132
LVC107	1	A	3	151.912	2021-09-09	09:10:59	09:13:29		14		13	13	12	30	-132
LVC107	1	B	1	118.338	2021-09-09	09:15:03	09:17:33		13		13	12	12	27	-135
LVC107	1	B	2	77.5552	2021-09-09	09:18:33	09:21:02		13		13	12	12	27	-135
LVC107	1	B	3	87.2872	2021-09-09	09:21:41	09:24:11		13		13	12	12	27	-135
LVC107	1	C	1	173.936	2021-09-09	09:26:01	09:28:31		14		13	13	12	34	-135
LVC107	1	C	2	151.117	2021-09-09	09:29:32	09:32:02		14		13	13	12	34	-135
LVC107	1	C	3	113.949	2021-09-09	09:32:59	09:35:29		14		13	13	12	34	-135
LVC107	1	A	1	114.223	2021-10-08	09:13:41	09:16:11		9		10	10	10	34	-137
LVC107	1	A	2	137.723	2021-10-08	09:17:11	09:19:40		9		10	10	10	34	-137
LVC107	1	A	3	76.673	2021-10-08	09:20:25	09:22:55		9		10	10	10	34	-137
LVC107	1	B	1	46.2332	2021-10-08	09:23:47	09:26:16		9		9	10	10	22	-137
LVC107	1	B	2	30.1236	2021-10-08	09:27:05	09:29:34		9		9	10	10	22	-137
LVC107	1	B	3	42.0911	2021-10-08	09:30:24	09:32:54		9		9	10	10	22	-137
LVC107	1	C	1	68.9788	2021-10-08	09:33:57	09:36:26		8		10	10	10	22	-137
LVC107	1	C	2	67.2401	2021-10-08	09:37:12	09:39:42		8		10	10	10	22	-137
LVC107	1	C	3	45.5062	2021-10-08	09:40:18	09:42:47		8		10	10	10	22	-137
LVC107	1	A	1	63.0043	2021-04-08	10:37:36	10:40:06		4		3	5	5		-107
LVC107	1	A	2	102.674	2021-04-08	10:41:21	10:43:51		4		3	5	5		-107
LVC107	1	A	3	78.0952	2021-04-08	10:45:11	10:47:41		4		3	5	5		-107
LVC107	1	B	1	106.274	2021-04-08	10:55:39	10:58:09		3		3	4	4		-76
LVC107	1	B	2	90.5239	2021-04-08	11:01:22	11:03:52		3		3	4	4		-76
LVC107	1	B	3	55.1356	2021-04-08	11:05:05	11:07:34		3		3	4	4		-76
LVC107	1	C	1	74.8751	2021-04-08	11:12:39	11:15:09		3		3	4	4		-83
LVC107	1	C	2	56.1703	2021-04-08	11:16:02	11:18:32		3		3	4	4		-83
LVC107	1	C	3	47.6813	2021-04-08	11:19:33	11:22:48		3		3	4	4		-83
LVC107	1	A	1	183.73	2022-07-13	10:32:37	10:35:07	16	15		13	12	11	34	0
LVC107	1	A	2	218.887	2022-07-13	10:35:49	10:38:19	16	15		13	12	11	34	0
LVC107	1	A	3	166.344	2022-07-13	10:39:13	10:41:43	16	15		13	12	11	34	0
LVC107	1	B	1	192.049	2022-07-13	10:42:39	10:45:10	15	14		13	12	12	34	0
LVC107	1	B	2	206.546	2022-07-13	10:45:52	10:48:23	15	14		13	12	12	34	0
LVC107	1	B	3	66.9629	2022-07-13	10:49:02	10:51:32	15	14		13	12	12	34	0
LVC107	1	C	1	361.529	2022-07-13	10:52:51	10:55:21	16	15		13	12	12	35	0
LVC107	1	C	2	310.114	2022-07-13	10:56:21	10:58:51	16	15		13	12	12	35	0
LVC107	1	C	3	214.94	2022-07-13	10:59:38	11:02:08	16	15		13	12	12	35	0
LVC108	1	A	1	126.132	2021-10-21	13:44:16	13:46:46		8		7	7	7	69	-5
LVC108	1	A	2	94.3092	2021-10-21	13:47:35	13:50:04		8		7	7	7	69	-5
LVC108	1	A	3	82.6035	2021-10-21	13:50:40	13:53:10		8		7	7	7	69	-5
LVC108	1	B	1	92.3638	2021-10-21	13:54:22	13:56:52		8		7	7	7	74	-30
LVC108	1	B	2	94.7878	2021-10-21	13:57:30	13:59:59		8		7	7	7	74	-30
LVC108	1	B	3	98.6425	2021-10-21	14:00:47	14:03:17		8		7	7	7	74	-30
LVC108	1	C	1	136.431	2021-10-21	14:04:17	14:06:47		6		8	8	8	59	-55
LVC108	1	C	2	122.185	2021-10-21	14:07:22	14:09:51		6		8	8	8	59	-55
LVC108	1	C	3	99.6341	2021-10-21	14:10:32	14:13:02		6		8	8	8	59	-55
LVC108	1	A	1	134.784	2022-05-26	14:24:32	14:27:03	12	11		10	10	8	98	0
LVC108	1	A	2	118.537	2022-05-26	14:27:51	14:30:21	12	11		10	10	8	98	0
LVC108	1	A	3	141.791	2022-05-26	14:31:02	14:33:32	12	11		10	10	8	98	0
LVC108	1	B	1	56.032	2022-05-26	14:34:46	14:37:16	12	11		12	10	8	99	0
LVC108	1	B	2	83.9657	2022-05-26	14:37:55	14:40:25	12	11		12	10	8	99	0
LVC108	1	B	3	86.3543	2022-05-26	14:41:12	14:43:43	12	11		12	10	8	99	0
LVC108	1	C	1	109.845	2022-05-26	14:44:48	14:47:19	9	9		9	8	8	96	-18
LVC108	1	C	2	112.814	2022-05-26	14:48:02	14:50:32	9	9		9	8	8	96	-18
LVC108	1	C	3	92.0284	2022-05-26	14:51:22	14:53:52	9	9		9	8	8	96	-18
LVC108	1	A	1	626.052	2022-06-27	13:45:03	13:47:33	18	19		16	14	12	96	-21
LVC108	1	A	2	1502.09	2022-06-27	13:49:00	13:51:30	18	19		16	14	12	96	-21
LVC108	1	A	3	748.496	2022-06-27	13:52:43	13:55:13	18	19		16	14	12	96	-21
LVC108	1	B	1	849.408	2022-06-27	13:57:41	14:00:11	18	17		15	13	11	96	-20
LVC108	1	B	2	1950.35	2022-06-27	14:01:43	14:04:13	18	17		15	13	11	96	-20
LVC108	1	B	3	1227.27	2022-06-27	14:05:20	14:07:50	18	17		15	13	11	96	-20
LVC108	1	C	1	402.516	2022-06-27	14:09:30	14:12:01	19	16		14	12	11	87	-46
LVC108	1	C	2	569.335	2022-06-27	14:13:40	14:16:25	19	16		14	12	11	87	-46
LVC108	1	C	3	404.023	2022-06-27	14:17:25	14:19:55	19	16		14	12	11	87	-46
LVC108	1	A	1	96.2217	2021-05-20	11:40:15	11:42:45		11		11	10	10	74	-1
LVC108	1	A	2	92.7838	2021-05-20	11:44:02	11:46:32		11		11	10	10	74	-1
LVC108	1	A	3	93.9454	2021-05-20	11:47:04	11:49:34		11		11	10	10	74	-1
LVC108	1	B	1	50.8941	2021-05-20	11:52:29	11:54:59		10		11	10	10	74	0
LVC108	1	B	2	69.216	2021-05-20	11:55:32	11:58:02		10		11	10	10	74	0
LVC108	1	B	3	55.4183	2021-05-20	11:58:41	12:01:11		10		11	10	10	74	0
LVC108	1	C	1	181.47	2021-05-20	12:04:01	12:06:31		9		9	8	8	71	-17
LVC108	1	C	2	190.267	2021-05-20	12:07:19	12:09:49		9		9	8	8	71	-17
LVC108	1	C	3	90.1249	2021-05-20	12:10:36	12:13:06		9		9	8	8	71	-17
LVC108	1	A	1	402.382	2021-07-20	13:38:56	13:41:26		18		18	17	17	61	-61
LVC108	1	A	2	420.323	2021-07-20	13:42:50	13:45:19		18		18	17	17	61	-61
LVC108	1	A	3	579.113	2021-07-20	13:46:10	13:48:40		18		18	17	17	61	-61
LVC108	1	B	1	328.808	2021-07-20	13:51:42	13:54:12		17		18	18	17	70	-59
LVC108	1	B	2	639.306	2021-07-20	13:55:12	13:57:42		17		18	18	17	70	-59
LVC108	1	B	3	375.196	2021-07-20	13:58:39	14:01:09		17		18	18	17	70	-59
LVC108	1	C	1	385.246	2021-07-20	14:04:19	14:06:49		17		17	16	17	36	-101
LVC108	1	C	2	283.769	2021-07-20	14:07:53	14:10:23		17		17	16	17	36	-101
LVC108	1	C	3	303.648	2021-07-20	14:11:31	14:14:01		17		17	16	17	36	-101
LVC108	1	A	1	264.521	2021-08-23	14:09:49	14:12:19		14		14	14	14	65	-50
LVC108	1	A	2	251.769	2021-08-23	14:13:03	14:15:32		14		14	14	14	65	-50
LVC108	1	A	3	270.419	2021-08-23	14:16:18	14:18:47		14		14	14	14	65	-50
LVC108	1	B	1	238.171	2021-08-23	14:20:40	14:23:09		14		14	14	14	70	-56
LVC108	1	B	2	402.882	2021-08-23	14:23:51	14:26:21		14		14	14	14	70	-56
LVC108	1	B	3	216.07	2021-08-23	14:27:06	14:29:36		14		14	14	14	70	-56
LVC108	1	C	1	229.895	2021-08-23	14:31:18	14:33:48		14		14	14	13	35	-92
LVC108	1	C	2	248.573	2021-08-23	14:34:33	14:37:03		14		14	14	13	35	-92
LVC108	1	C	3	203.336	2021-08-23	14:37:50	14:40:19		14		14	14	13	35	-92
LVC108	1	A	1	245.914	2021-09-17	10:35:55	10:38:24		9		11	12	12	36	-54
LVC108	1	A	2	187.605	2021-09-17	10:39:13	10:41:42		9		11	12	12	36	-54
LVC108	1	A	3	118.597	2021-09-17	10:42:28	10:44:58		9		11	12	12	36	-54
LVC108	1	B	1	104.056	2021-09-17	10:48:30	10:50:59		10		11	11	12	69	-57
LVC108	1	B	2	210.553	2021-09-17	10:52:03	10:54:33		10		11	11	12	69	-57
LVC108	1	B	3	181.686	2021-09-17	10:55:23	10:57:52		10		11	11	12	69	-57
LVC108	1	C	1	155.055	2021-09-17	10:59:33	11:02:02		10		11	11	12	35	-90
LVC108	1	C	2	188.874	2021-09-17	11:02:41	11:05:11		10		11	11	12	35	-90
LVC108	1	C	3	147.067	2021-09-17	11:06:00	11:08:30		10		11	11	12	35	-90
LVC108	1	A	1	261.559	2021-04-20	15:57:33	16:00:03		7		8	5	5	74	-2
LVC108	1	A	2	133.17	2021-04-20	16:00:58	16:03:28		7		8	5	5	74	-2
LVC108	1	A	3	117.961	2021-04-20	16:04:25	16:06:55		7		8	5	5	74	-2
LVC108	1	B	1	119.392	2021-04-20	16:10:15	16:12:45		7		7	5	5	75	-1
LVC108	1	B	2	128.627	2021-04-20	16:13:23	16:15:53		7		7	5	5	75	-1
LVC108	1	B	3	152.371	2021-04-20	16:16:25	16:18:54		7		7	5	5	75	-1
LVC108	1	C	1	485.977	2021-04-20	16:21:20	16:23:50		7		7	4	4	70	-21
LVC108	1	C	2	476.895	2021-04-20	16:24:58	16:27:28		7		7	4	4	70	-21
LVC108	1	C	3	0	2021-04-20	16:28:07	16:33:38		7		7	4	4	70	-21
LVC108	1	A	1	502.446	2022-07-21	16:01:53	16:04:23	18	16		15	14	13	92	0
LVC108	1	A	2	948.506	2022-07-21	16:05:33	16:08:03	18	16		15	14	13	92	0
LVC108	1	A	3	1147.37	2022-07-21	16:09:20	16:11:51	18	16		15	14	13	92	0
LVC108	1	B	1	1195.78	2022-07-21	16:13:43	16:16:13	17	16		14	13	13	95	0
LVC108	1	B	2	1315.71	2022-07-21	16:17:14	16:19:44	17	16		14	13	13	95	0
LVC108	1	B	3	1459.49	2022-07-21	16:20:38	16:23:08	17	16		14	13	13	95	0
LVC108	1	C	1	366.372	2022-07-21	16:25:12	16:27:43	17	16		14	13	12	55	0
LVC108	1	C	2	411.968	2022-07-21	16:28:34	16:31:04	17	16		14	13	12	55	0
LVC108	1	C	3	397.731	2022-07-21	16:31:47	16:34:17	17	16		14	13	12	55	0
LVC108	1	A	1	590.684	2022-08-23	14:50:00	14:52:30	19	18		17	16	15	11	0
LVC108	1	A	2	953.568	2022-08-23	14:53:15	14:55:59	19	18		17	16	15	11	0
LVC108	1	A	3	1541.23	2022-08-23	14:56:35	14:59:05	19	18		17	16	15	11	0
LVC108	1	B	1	566.472	2022-08-23	15:00:12	15:02:52	19	18		17	16	14	88	0
LVC108	1	B	2	1272.89	2022-08-23	15:03:38	15:06:08	19	18		17	16	14	88	0
LVC108	1	B	3	1380.72	2022-08-23	15:07:03	15:09:33	19	18		17	16	14	88	0
LVC108	1	C	1	408.361	2022-08-23	15:10:48	15:13:18	19	17		16	15	14	23	0
LVC108	1	C	2	522.817	2022-08-23	15:15:05	15:17:35	19	17		16	15	14	23	0
LVC108	1	C	3	373.362	2022-08-23	15:18:24	15:20:54	19	17		16	15	14	23	0
LVC108	1	A	1	223.181	2022-09-23	09:10:17	09:12:47	9	10		11	11	10	91	0
LVC108	1	A	2	264.235	2022-09-23	09:13:37	09:16:07	9	10		11	11	10	91	0
LVC108	1	A	3	293.715	2022-09-23	09:17:04	09:19:35	9	10		11	11	10	91	0
LVC108	1	B	1	164.959	2022-09-23	09:20:41	09:23:11	9	10		11	11	10	94	0
LVC108	1	B	2	317.549	2022-09-23	09:24:03	09:26:33	9	10		11	11	10	94	0
LVC108	1	B	3	331.178	2022-09-23	09:27:30	09:30:01	9	10		11	11	10	94	0
LVC108	1	C	1	107.069	2022-09-23	09:31:15	09:33:45	9	10		11	11	10	45	0
LVC108	1	C	2	172.168	2022-09-23	09:34:34	09:37:04	9	10		11	11	10	45	0
LVC108	1	C	3	127.159	2022-09-23	09:37:57	09:40:27	9	10		11	11	10	45	0
LVC108	1	A	1	116.082	2022-10-26	12:50:50	12:53:20	8	8		8	8	8	97	0
LVC108	1	A	2	150.446	2022-10-26	12:54:08	12:56:38	8	8		8	8	8	97	0
LVC108	1	A	3	94.5452	2022-10-26	12:57:24	12:59:55	8	8		8	8	8	97	0
LVC108	1	B	1	132.441	2022-10-26	13:00:59	13:03:30	8	8		8	8	8	96	0
LVC108	1	B	2	186.806	2022-10-26	13:04:09	13:06:39	8	8		8	8	8	96	0
LVC108	1	B	3	246.691	2022-10-26	13:07:19	13:09:50	8	8		8	8	8	96	0
LVC108	1	C	1	118.616	2022-10-26	13:10:56	13:13:27	8	8		8	9	9	85	0
LVC108	1	C	2	176.006	2022-10-26	13:14:10	13:16:40	8	8		8	9	9	85	0
LVC108	1	C	3	112.479	2022-10-26	13:17:18	13:19:49	8	8		8	9	9	85	0
LVC109	1	A	1	156.286	2022-05-10	14:20:56	14:23:26		9		12	8	7	100	0
LVC109	1	A	2	134.942	2022-05-10	14:24:29	14:26:59		9		12	8	7	100	0
LVC109	1	A	3	107.535	2022-05-10	14:27:51	14:30:21		9		12	8	7	100	0
LVC109	1	B	1	170.674	2022-05-10	14:32:51	14:35:21		9		11	8	8	99	0
LVC109	1	B	2	112.576	2022-05-10	14:36:15	14:38:45		9		11	8	8	99	0
LVC109	1	B	3	105.388	2022-05-10	14:39:42	14:42:12		9		11	8	8	99	0
LVC109	1	C	1	101.432	2022-05-10	14:43:35	14:46:05		8		10	7	7	98	0
LVC109	1	C	2	120.264	2022-05-10	14:46:58	14:49:28		8		10	7	7	98	0
LVC109	1	C	3	113.38	2022-05-10	14:50:21	14:52:51		8		10	7	7	98	0
LVC109	1	A	1	118.494	2022-06-06	13:35:57	13:38:27	17	13		17	11	11	99	0
LVC109	1	A	2	100.984	2022-06-06	13:39:20	13:41:50	17	13		17	11	11	99	0
LVC109	1	A	3	65.0187	2022-06-06	13:42:50	13:45:20	17	13		17	11	11	99	0
LVC109	1	B	1	141.096	2022-06-06	13:46:25	13:48:55	15	14		15	12	11	99	-1
LVC109	1	B	2	128.1	2022-06-06	13:49:42	13:52:12	15	14		15	12	11	99	-1
LVC109	1	B	3	132.937	2022-06-06	13:53:02	13:55:32	15	14		15	12	11	99	-1
LVC109	1	C	1	104.66	2022-06-06	13:56:38	13:59:08	12	13		14	11	10	99	-1
LVC109	1	C	2	213.76	2022-06-06	14:00:00	14:02:30	12	13		14	11	10	99	-1
LVC109	1	C	3	134.432	2022-06-06	14:03:17	14:05:44	12	13		14	11	10	99	-1
LVC109	1	A	1	98.9774	2021-05-10	14:38:48	14:41:18		11		12	7	7	78	1
LVC109	1	A	2	85.1937	2021-05-10	14:42:10	14:44:40		11		12	7	7	78	1
LVC109	1	A	3	72.4411	2021-05-10	14:45:32	14:48:02		11		12	7	7	78	1
LVC109	1	B	1	406.544	2021-05-10	14:53:21	14:55:51		10		11	7	7	76	1
LVC109	1	B	2	195.237	2021-05-10	14:56:47	14:59:17		10		11	7	7	76	1
LVC109	1	B	3	190.576	2021-05-10	15:00:45	15:03:15		10		11	7	7	76	1
LVC109	1	C	1	87.3242	2021-05-10	15:07:12	15:09:42		10		12	7	7	75	1
LVC109	1	C	2	246.099	2021-05-10	15:10:26	15:12:56		10		12	7	7	75	1
LVC109	1	C	3	91.3515	2021-05-10	15:13:42	15:16:12		10		12	7	7	75	1
LVC109	1	A	1	299.319	2021-06-07	15:38:00	15:40:30		14		12	10	10	75	-1
LVC109	1	A	2	294.792	2021-06-07	15:41:05	15:43:35		14		12	10	10	75	-1
LVC109	1	A	3	150.226	2021-06-07	15:44:40	15:47:10		14		12	10	10	75	-1
LVC109	1	B	1	469.116	2021-06-07	15:50:26	15:52:55		15		13	12	11	76	-2
LVC109	1	B	2	274.587	2021-06-07	15:53:23	15:55:53		15		13	12	11	76	-2
LVC109	1	B	3	206.741	2021-06-07	15:56:34	15:59:04		15		13	12	11	76	-2
LVC109	1	C	1	226.455	2021-06-07	16:02:20	16:04:50		15		13	12	11	74	-5
LVC109	1	C	2	464.561	2021-06-07	16:05:22	16:07:52		15		13	12	11	74	-5
LVC109	1	C	3	288.106	2021-06-07	16:08:30	16:11:00		15		13	12	11	74	-5
LVC109	1	A	1	1238.41	2021-07-08	14:17:45	14:20:15		21		18	16	15	62	-50
LVC109	1	A	2	944.848	2021-07-08	14:21:01	14:23:31		21		18	16	15	62	-50
LVC109	1	A	3	895.212	2021-07-08	14:24:14	14:26:44		21		18	16	15	62	-50
LVC109	1	B	1	846.559	2021-07-08	14:28:56	14:31:26		20		18	15	15	64	-47
LVC109	1	B	2	345.633	2021-07-08	14:32:27	14:34:57		20		18	15	15	64	-47
LVC109	1	B	3	775.341	2021-07-08	14:36:12	14:38:42		20		18	15	15	64	-47
LVC109	1	C	1	1277.71	2021-07-08	14:42:47	14:45:16		20		17	15	14	72	-51
LVC109	1	C	2	2203.58	2021-07-08	14:46:53	14:49:23		20		17	15	14	72	-51
LVC109	1	A	1	687.887	2021-08-09	14:12:54	14:15:23		17		16	15	15	67	-47
LVC109	1	A	2	441.761	2021-08-09	14:16:27	14:18:57		17		16	15	15	67	-47
LVC109	1	A	3	553.925	2021-08-09	14:19:53	14:22:23		17		16	15	15	67	-47
LVC109	1	B	1	500.269	2021-08-09	14:23:59	14:26:28		16		16	15	15	58	-46
LVC109	1	B	2	673.819	2021-08-09	14:27:22	14:29:52		16		16	15	15	58	-46
LVC109	1	B	3	515.571	2021-08-09	14:30:44	14:33:14		16		16	15	15	58	-46
LVC109	1	C	1	644.792	2021-08-09	14:35:01	14:37:30		17		16	15	15	61	-51
LVC109	1	C	2	833.437	2021-08-09	14:38:23	14:40:53		17		16	15	15	61	-51
LVC109	1	C	3	1613.88	2021-08-09	14:41:39	14:44:09		17		16	15	15	61	-51
LVC109	1	A	1	747.784	2021-09-08	14:06:49	14:09:18		17		16	15	15	67	-47
LVC109	1	A	2	309.158	2021-09-08	14:10:02	14:12:32		17		16	15	15	67	-47
LVC109	1	A	3	267.08	2021-09-08	14:13:24	14:15:54		17		16	15	15	67	-47
LVC109	1	B	1	292.855	2021-09-08	14:17:37	14:20:07		16		16	15	15	58	-46
LVC109	1	B	2	186.132	2021-09-08	14:20:59	14:23:29		16		16	15	15	58	-46
LVC109	1	B	3	177.212	2021-09-08	14:24:10	14:26:39		16		16	15	15	58	-46
LVC109	1	C	1	178.155	2021-09-08	14:28:37	14:31:06		17		16	15	15	61	-51
LVC109	1	C	2	476.475	2021-09-08	14:31:54	14:34:24		17		16	15	15	61	-51
LVC109	1	C	3	585.047	2021-09-08	14:35:11	14:37:41		17		16	15	15	61	-51
LVC109	1	A	1	223.719	2021-10-11	14:08:27	14:10:57		8		10	10	10	78	-10
LVC109	1	A	2	112.662	2021-10-11	14:11:33	14:14:02		8		10	10	10	78	-10
LVC109	1	A	3	84.1	2021-10-11	14:14:36	14:17:06		8		10	10	10	78	-10
LVC109	1	B	1	118.396	2021-10-11	14:18:05	14:20:35		7		9	9	9	77	-11
LVC109	1	B	2	43.8282	2021-10-11	14:21:15	14:23:44		7		9	9	9	77	-11
LVC109	1	B	3	41.9052	2021-10-11	14:24:18	14:26:48		7		9	9	9	77	-11
LVC109	1	C	1	99.3183	2021-10-11	14:27:41	14:30:10		8		9	9	10	75	-19
LVC109	1	C	2	180.201	2021-10-11	14:30:47	14:33:16		8		9	9	10	75	-19
LVC109	1	C	3	281.812	2021-10-11	14:33:54	14:36:24		8		9	9	10	75	-19
LVC109	1	A	1	66.8893	2021-04-07	14:50:54	14:53:24		3		3	4	4		2
LVC109	1	A	2	22.0824	2021-04-07	14:54:31	14:57:01		3		3	4	4		2
LVC109	1	A	3	28.7399	2021-04-07	14:57:54	15:00:24		3		3	4	4		2
LVC109	1	B	1	237.362	2021-04-07	15:05:44	15:08:14		3		3	4	4		2
LVC109	1	B	2	58.5818	2021-04-07	15:09:24	15:11:54		3		3	4	4		2
LVC109	1	B	3	60.7025	2021-04-07	15:13:22	15:15:52		3		3	4	4		2
LVC109	1	C	1	163.119	2021-04-07	15:24:50	15:27:20		3		3	4	4		3
LVC109	1	C	2	154.543	2021-04-07	15:28:56	15:31:25		3		3	4	4		3
LVC109	1	C	3	0	2021-04-07	15:32:33	15:38:18		3		3	4	4		3
LVC109	1	A	1	1020.41	2022-07-07	13:17:18	13:19:48	16	16		15	15	14	86	0
LVC109	1	A	2	831.781	2022-07-07	13:20:40	13:23:10	16	16		15	15	14	86	0
LVC109	1	A	3	587.095	2022-07-07	13:24:10	13:26:40	16	16		15	15	14	86	0
LVC109	1	B	1	349.129	2022-07-07	13:27:56	13:30:26	16	16		16	15	15	97	0
LVC109	1	B	2	263.804	2022-07-07	13:31:30	13:34:01	16	16		16	15	15	97	0
LVC109	1	B	3	267.18	2022-07-07	13:35:15	13:37:46	16	16		16	15	15	97	0
LVC109	1	C	1	334.251	2022-07-07	13:39:22	13:41:52	16	16		15	15	14	97	0
LVC109	1	C	2	807.197	2022-07-07	13:42:37	13:45:08	16	16		15	15	14	97	0
LVC109	1	C	3	807.224	2022-07-07	13:45:59	13:48:29	16	16		15	15	14	97	0
LVC109	1	A	1	99.2836	2022-08-08	10:27:54	10:30:24	14	15		15	14	14	100	0
LVC109	1	A	2	81.5284	2022-08-08	10:31:11	10:33:42	14	15		15	14	14	100	0
LVC109	1	A	3	88.1795	2022-08-08	10:35:44	10:38:14	14	15		15	14	14	100	0
LVC109	1	B	1	67.0178	2022-08-08	10:39:31	10:42:01	15	15		15	14	14	100	0
LVC109	1	B	2	85.7943	2022-08-08	10:43:10	10:45:40	15	15		15	14	14	100	0
LVC109	1	B	3	71.4735	2022-08-08	10:47:29	10:49:59	15	15		15	14	14	100	0
LVC109	1	C	1	126.587	2022-08-08	10:51:56	10:54:27	15	15		15	14	14	94	0
LVC109	1	C	2	319.792	2022-08-08	10:55:17	10:57:47	15	15		15	14	14	94	0
LVC109	1	C	3	160.737	2022-08-08	10:59:01	11:01:31	15	15		15	14	14	94	0
LVC109	1	A	1	161.369	2022-09-09	09:07:53	09:10:23	9	10		11	12	12	93	0
LVC109	1	A	2	284.276	2022-09-09	09:11:26	09:13:56	9	10		11	12	12	93	0
LVC109	1	A	3	476.605	2022-09-09	09:15:01	09:17:31	9	10		11	12	12	93	0
LVC109	1	B	1	120.685	2022-09-09	09:18:18	09:20:49	9	10		11	12	12	89	0
LVC109	1	B	2	41.069	2022-09-09	09:21:28	09:23:58	9	10		11	12	12	89	0
LVC109	1	B	3	79.6408	2022-09-09	09:24:39	09:27:09	9	10		11	12	12	89	0
LVC109	1	C	1	456.748	2022-09-09	09:28:05	09:30:35	9	11		12	12	12	93	0
LVC109	1	C	2	920.244	2022-09-09	09:31:29	09:33:59	9	11		12	12	12	93	0
LVC109	1	C	3	667.887	2022-09-09	09:34:42	09:37:13	9	11		12	12	12	93	0
LVC109	1	A	1	147.713	2022-10-10	13:15:31	13:18:02	8	10		10	10	10	99	0
LVC109	1	A	2	123.991	2022-10-10	13:18:46	13:21:16	8	10		10	10	10	99	0
LVC109	1	A	3	80.2306	2022-10-10	13:22:03	13:24:33	8	10		10	10	10	99	0
LVC109	1	B	1	54.5601	2022-10-10	13:25:35	13:28:05	8	9		9	9	10	98	0
LVC109	1	B	2	61.9984	2022-10-10	13:28:44	13:31:14	8	9		9	9	10	98	0
LVC109	1	B	3	73.2455	2022-10-10	13:32:01	13:34:31	8	9		9	9	10	98	0
LVC109	1	C	1	202.982	2022-10-10	13:35:38	13:38:08	8	9		10	10	10	95	0
LVC109	1	C	2	158.687	2022-10-10	13:38:50	13:41:21	8	9		10	10	10	95	0
LVC109	1	C	3	114.63	2022-10-10	13:42:05	13:44:35	8	9		10	10	10	95	0
LVC109	1	A	1	53.0039	2022-11-09	12:27:45	12:30:15	8	9		9	9	9	100	0
LVC109	1	A	2	48.7653	2022-11-09	12:31:13	12:33:43	8	9		9	9	9	100	0
LVC109	1	A	3	58.901	2022-11-09	12:34:29	12:37:00	8	9		9	9	9	100	0
LVC109	1	B	1	72.602	2022-11-09	12:38:01	12:40:31	8	8		8	8	8	98	0
LVC109	1	B	2	61.9702	2022-11-09	12:41:33	12:44:03	8	8		8	8	8	98	0
LVC109	1	B	3	84.0975	2022-11-09	12:45:04	12:47:35	8	8		8	8	8	98	0
LVC109	1	C	1	59.4058	2022-11-09	12:48:59	12:51:30	8	9		9	9	9	97	0
LVC109	1	C	2	80.3357	2022-11-09	12:52:11	12:54:41	8	9		9	9	9	97	0
LVC109	1	C	3	49.2981	2022-11-09	12:55:23	12:57:53	8	9		9	9	9	97	0
LVC110	1	A	1	59.5728	2022-05-11	11:19:16	11:21:46	7	7		8	6	6	32	-73
LVC110	1	A	2	124.027	2022-05-11	11:22:29	11:25:00	7	7		8	6	6	32	-73
LVC110	1	A	3	103.638	2022-05-11	11:25:44	11:28:14	7	7		8	6	6	32	-73
LVC110	1	B	1	103.212	2022-05-11	11:29:23	11:31:53	7	7		8	6	6	36	-35
LVC110	1	B	2	209.68	2022-05-11	11:32:50	11:35:20	7	7		8	6	6	36	-35
LVC110	1	B	3	72.3681	2022-05-11	11:36:21	11:38:52	7	7		8	6	6	36	-35
LVC110	1	C	1	75.627	2022-05-11	11:40:05	11:42:36	8	7		8	6	6	19	-51
LVC110	1	C	2	106.003	2022-05-11	11:43:19	11:45:49	8	7		8	6	6	19	-51
LVC110	1	C	3	63.9711	2022-05-11	11:46:28	11:48:58	8	7		8	6	6	19	-51
LVC110	1	A	1	149.262	2022-06-07	11:42:44	11:45:14	12	10		12	9	9	31	-50
LVC110	1	A	2	191.722	2022-06-07	11:45:58	11:48:28	12	10		12	9	9	31	-50
LVC110	1	A	3	223.709	2022-06-07	11:49:14	11:51:45	12	10		12	9	9	31	-50
LVC110	1	B	1	112.204	2022-06-07	11:52:46	11:55:17	12	12		13	10	9	91	-17
LVC110	1	B	2	296.097	2022-06-07	11:56:07	11:58:38	12	12		13	10	9	91	-17
LVC110	1	B	3	127.786	2022-06-07	11:59:18	12:01:49	12	12		13	10	9	91	-17
LVC110	1	C	1	188.587	2022-06-07	12:03:00	12:05:31	12	11		12	9	9	28	-43
LVC110	1	C	2	158.78	2022-06-07	12:06:11	12:08:41	12	11		12	9	9	28	-43
LVC110	1	C	3	119.57	2022-06-07	12:09:27	12:11:57	12	11		12	9	9	28	-43
LVC110	1	A	1	195.863	2021-05-11	13:37:15	13:39:45		10		9	6	6	24	-67
LVC110	1	A	2	161.056	2021-05-11	13:40:40	13:43:10		10		9	6	6	24	-67
LVC110	1	A	3	179.484	2021-05-11	13:43:57	13:46:27		10		9	6	6	24	-67
LVC110	1	B	1	150.528	2021-05-11	13:49:50	13:52:20		11		11	7	6	58	-18
LVC110	1	B	2	304.974	2021-05-11	13:53:07	13:55:37		11		11	7	6	58	-18
LVC110	1	B	3	132.098	2021-05-11	13:56:20	13:58:50		11		11	7	6	58	-18
LVC110	1	C	1	196.491	2021-05-11	14:03:01	14:05:31		11		10	6	6	31	-39
LVC110	1	C	2	192.947	2021-05-11	14:06:14	14:08:44		11		10	6	6	31	-39
LVC110	1	C	3	116.814	2021-05-11	14:09:25	14:11:55		11		10	6	6	31	-39
LVC110	1	A	1	192.767	2021-06-08	12:58:22	13:00:52		14		10	9	9	23	-61
LVC110	1	A	2	205.336	2021-06-08	13:01:24	13:03:53		14		10	9	9	23	-61
LVC110	1	A	3	224.51	2021-06-08	13:04:33	13:07:03		14		10	9	9	23	-61
LVC110	1	B	1	291.443	2021-06-08	13:09:31	13:12:01		14		12	11	10	60	-18
LVC110	1	B	2	457.29	2021-06-08	13:12:44	13:15:14		14		12	11	10	60	-18
LVC110	1	B	3	215.062	2021-06-08	13:16:05	13:18:35		14		12	11	10	60	-18
LVC110	1	C	1	282.651	2021-06-08	13:21:39	13:24:09		14		11	10	10	14	-33
LVC110	1	C	2	262.012	2021-06-08	13:24:38	13:27:08		14		11	10	10	14	-33
LVC110	1	C	3	117.167	2021-06-08	13:27:43	13:30:13		14		11	10	10	14	-33
LVC110	1	A	1	322.849	2021-07-09	12:57:08	12:59:38		18		15	13	12	18	-128
LVC110	1	A	2	331.693	2021-07-09	13:00:19	13:02:49		18		15	13	12	18	-128
LVC110	1	A	3	273.943	2021-07-09	13:03:38	13:06:07		18		15	13	12	18	-128
LVC110	1	B	1	427.786	2021-07-09	13:08:01	13:10:31		17		16	14	13	31	-106
LVC110	1	B	2	651.123	2021-07-09	13:11:17	13:13:47		17		16	14	13	31	-106
LVC110	1	B	3	536.569	2021-07-09	13:14:32	13:17:02		17		16	14	13	31	-106
LVC110	1	C	1	481.915	2021-07-09	13:19:03	13:21:33		18		15	13	13	13	-106
LVC110	1	C	2	436.987	2021-07-09	13:22:34	13:25:03		18		15	13	13	13	-106
LVC110	1	C	3	206.341	2021-07-09	13:25:42	13:28:12		18		15	13	13	13	-106
LVC110	1	A	1	248.373	2021-08-10	12:05:27	12:07:57		14		13	13	13	31	-128
LVC110	1	A	2	256.616	2021-08-10	12:08:48	12:11:18		14		13	13	13	31	-128
LVC110	1	A	3	253.985	2021-08-10	12:12:17	12:14:47		14		13	13	13	31	-128
LVC110	1	B	1	254.867	2021-08-10	12:16:19	12:18:49		15		14	14	13	37	-131
LVC110	1	B	2	419.76	2021-08-10	12:20:01	12:22:31		15		14	14	13	37	-131
LVC110	1	B	3	179.261	2021-08-10	12:23:30	12:26:00		15		14	14	13	37	-131
LVC110	1	C	1	341.733	2021-08-10	12:28:06	12:30:36		14		14	13	13	21	-132
LVC110	1	C	2	298.971	2021-08-10	12:31:42	12:34:12		14		14	13	13	21	-132
LVC110	1	C	3	259.471	2021-08-10	12:35:24	12:37:53		14		14	13	13	21	-132
LVC110	1	A	1	219.565	2021-09-09	12:15:45	12:18:14		14		13	13	13	31	-128
LVC110	1	A	2	268.321	2021-09-09	12:19:04	12:21:33		14		13	13	13	31	-128
LVC110	1	A	3	246.611	2021-09-09	12:22:12	12:24:42		14		13	13	13	31	-128
LVC110	1	B	1	252.322	2021-09-09	12:26:26	12:28:56		15		14	14	13	37	-131
LVC110	1	B	2	390.603	2021-09-09	12:30:00	12:32:30		15		14	14	13	37	-131
LVC110	1	B	3	224.733	2021-09-09	12:33:11	12:35:40		15		14	14	13	37	-131
LVC110	1	C	1	417.999	2021-09-09	12:37:17	12:39:46		14		14	13	13	21	-132
LVC110	1	C	2	323.162	2021-09-09	12:40:55	12:43:24		14		14	13	13	21	-132
LVC110	1	C	3	184.534	2021-09-09	12:44:07	12:46:37		14		14	13	13	21	-132
LVC110	1	A	1	148.801	2021-10-08	11:59:13	12:01:43		8		10	10	10	33	-131
LVC110	1	A	2	149.082	2021-10-08	12:02:35	12:05:04		8		10	10	10	33	-131
LVC110	1	A	3	127.951	2021-10-08	12:05:54	12:08:24		8		10	10	10	33	-131
LVC110	1	B	1	119.588	2021-10-08	12:09:22	12:11:52		9		10	10	11	34	-129
LVC110	1	B	2	229.56	2021-10-08	12:12:45	12:15:14		9		10	10	11	34	-129
LVC110	1	B	3	122.72	2021-10-08	12:15:57	12:18:27		9		10	10	11	34	-129
LVC110	1	C	1	213.094	2021-10-08	12:19:33	12:22:02		8		10	10	11	17	-131
LVC110	1	C	2	196.371	2021-10-08	12:22:53	12:25:22		8		10	10	11	17	-131
LVC110	1	C	3	158.873	2021-10-08	12:26:10	12:28:40		8		10	10	11	17	-131
LVC110	1	A	1	282.074	2022-08-09	14:42:58	14:45:29	14	14		13	13	13	32	0
LVC110	1	A	2	510.607	2022-08-09	14:47:02	14:49:33	14	14		13	13	13	32	0
LVC110	1	A	3	347.416	2022-08-09	14:51:29	14:53:59	14	14		13	13	13	32	0
LVC110	1	B	1	287.709	2022-08-09	14:58:15	15:00:46	15	15		14	14	13	85	0
LVC110	1	B	2	582.537	2022-08-09	15:01:57	15:04:28	15	15		14	14	13	85	0
LVC110	1	B	3	236.416	2022-08-09	15:05:54	15:08:25	15	15		14	14	13	85	0
LVC110	1	C	1	650.509	2022-08-09	15:09:56	15:12:26	16	15		13	13	13	14	0
LVC110	1	C	2	436.811	2022-08-09	15:15:36	15:18:06	16	15		13	13	13	14	0
LVC110	1	C	3	207.118	2022-08-09	15:19:30	15:22:00	16	15		13	13	13	14	0
LVC110	1	A	1	141.643	2022-09-08	11:09:25	11:11:55	10	11		12	12	12	13	0
LVC110	1	A	2	223.349	2022-09-08	11:12:35	11:15:05	10	11		12	12	12	13	0
LVC110	1	A	3	211.265	2022-09-08	11:15:46	11:18:17	10	11		12	12	12	13	0
LVC110	1	B	1	151.554	2022-09-08	11:19:19	11:21:49	9	11		12	12	12	69	0
LVC110	1	B	2	341.716	2022-09-08	11:22:32	11:25:02	9	11		12	12	12	69	0
LVC110	1	B	3	155.831	2022-09-08	11:25:46	11:28:17	9	11		12	12	12	69	0
LVC110	1	C	1	448.857	2022-09-08	11:29:19	11:31:50	9	11		12	12	12	23	0
LVC110	1	C	2	15.325	2022-09-08	11:23:35	11:35:05	9	11		12	12	12	23	0
LVC110	1	C	3	187.136	2022-09-08	11:35:55	11:38:25	9	11		12	12	12	23	0
LVC110	1	A	1	218.74	2022-10-11	11:27:48	11:30:18	9	10		10	10	10	16	0
LVC110	1	A	2	304.545	2022-10-11	11:31:11	11:33:41	9	10		10	10	10	16	0
LVC110	1	A	3	123.98	2022-10-11	11:34:47	11:37:17	9	10		10	10	10	16	0
LVC110	1	B	1	145.44	2022-10-11	11:38:22	11:40:52	9	9		10	10	10	53	0
LVC110	1	B	2	335.466	2022-10-11	11:41:35	11:44:06	9	9		10	10	10	53	0
LVC110	1	B	3	101.181	2022-10-11	11:44:54	11:47:24	9	9		10	10	10	53	0
LVC110	1	C	1	468.613	2022-10-11	11:48:32	11:51:02	8	9		10	10	10	20	0
LVC110	1	C	2	344.119	2022-10-11	11:52:34	11:55:04	8	9		10	10	10	20	0
LVC110	1	C	3	178.565	2022-10-11	11:55:46	11:58:17	8	9		10	10	10	20	0
LVC110	1	A	1	130.772	2022-11-11	10:24:25	10:26:55	9	9		9	10	9	33	0
LVC110	1	A	2	198.588	2022-11-11	10:27:36	10:30:07	9	9		9	10	9	33	0
LVC110	1	A	3	116.941	2022-11-11	10:30:52	10:33:22	9	9		9	10	9	33	0
LVC110	1	B	1	163.692	2022-11-11	10:34:30	10:37:00	8	9		9	9	9	90	0
LVC110	1	B	2	219.68	2022-11-11	10:37:41	10:40:12	8	9		9	9	9	90	0
LVC110	1	B	3	74.0456	2022-11-11	10:41:01	10:43:31	8	9		9	9	9	90	0
LVC110	1	C	1	151.622	2022-11-11	10:44:26	10:46:56	9	10		10	10	10	31	0
LVC110	1	C	2	23.299	2022-11-11	10:48:41	10:51:11	9	10		10	10	10	31	0
LVC110	1	C	3	100.886	2022-11-11	10:51:55	10:54:26	9	10		10	10	10	31	0
LVC111	1	A	1	97.786	2021-10-22	09:45:32	09:48:02		8		8	8	8	76	-7
LVC111	1	A	2	151.889	2021-10-22	09:48:43	09:51:12		8		8	8	8	76	-7
LVC111	1	A	3	83.2799	2021-10-22	09:51:51	09:54:21		8		8	8	8	76	-7
LVC111	1	B	1	83.2694	2021-10-22	09:55:18	09:57:48		8		8	7	8	76	-3
LVC111	1	B	2	149.921	2021-10-22	09:58:26	10:00:55		8		8	7	8	76	-3
LVC111	1	B	3	176.742	2021-10-22	10:01:47	10:04:17		8		8	7	8	76	-3
LVC111	1	C	1	52.3947	2021-10-22	10:05:28	10:07:57		8		8	8	8	79	-2
LVC111	1	C	2	42.2801	2021-10-22	10:08:32	10:11:02		8		8	8	8	79	-2
LVC111	1	C	3	75.9413	2021-10-22	10:11:38	10:14:07		8		8	8	8	79	-2
LVC111	1	A	1	88.4591	2022-05-24	14:51:37	14:54:08		11		12	10	10	100	-2
LVC111	1	A	2	274.319	2022-05-24	14:55:11	14:57:42		11		12	10	10	100	-2
LVC111	1	A	3	93.5971	2022-05-24	14:58:42	15:01:13		11		12	10	10	100	-2
LVC111	1	B	1	95.8727	2022-05-24	15:02:38	15:05:09		10		6	8	8	100	-2
LVC111	1	B	2	107.879	2022-05-24	15:06:01	15:08:32		10		6	8	8	100	-2
LVC111	1	B	3	110.159	2022-05-24	15:09:36	15:12:07		10		6	8	8	100	-2
LVC111	1	C	1	101.513	2022-05-24	15:13:37	15:16:08		10		10	8	8	100	-2
LVC111	1	C	2	64.1116	2022-05-24	15:17:09	15:19:40		10		10	8	8	100	-2
LVC111	1	C	3	89.1061	2022-05-24	15:20:22	15:22:52		10		10	8	8	100	-2
LVC111	1	A	1	11.8534	2022-06-20	15:56:21	15:56:42	15	14		15	13	13	100	0
LVC111	1	A	2	56.3649	2022-06-20	15:58:01	16:00:32	15	14		15	13	13	100	0
LVC111	1	A	3	61.1751	2022-06-20	16:02:22	16:04:52	15	14		15	13	13	100	0
LVC111	1	B	1	159.322	2022-06-20	16:06:23	16:08:53	15	14		13	13	12	97	0
LVC111	1	B	2	249.666	2022-06-20	16:09:57	16:12:27	15	14		13	13	12	97	0
LVC111	1	B	3	272.678	2022-06-20	16:13:44	16:16:14	15	14		13	13	12	97	0
LVC111	1	C	1	49.1333	2022-06-20	16:17:58	16:20:28	14	14		14	12	12	94	-2
LVC111	1	C	2	38.1369	2022-06-20	16:21:36	16:24:06	14	14		14	12	12	94	-2
LVC111	1	C	3	84.7167	2022-06-20	16:26:09	16:28:39	14	14		14	12	12	94	-2
LVC111	1	A	1	62.9945	2021-05-19	16:27:17	16:29:47		11		11	11	11	79	-1
LVC111	1	A	2	75.3093	2021-05-19	16:30:39	16:33:09		11		11	11	11	79	-1
LVC111	1	A	3	60.4747	2021-05-19	16:34:03	16:36:33		11		11	11	11	79	-1
LVC111	1	B	1	151.462	2021-05-19	16:38:43	16:41:13		11		11	10	9	77	-1
LVC111	1	B	2	152.453	2021-05-19	16:41:55	16:44:25		11		11	10	9	77	-1
LVC111	1	B	3	167.91	2021-05-19	16:45:12	16:47:41		11		11	10	9	77	-1
LVC111	1	C	1	69.9824	2021-05-19	16:50:11	16:52:41		12		11	11	10	77	-1
LVC111	1	C	2	103.113	2021-05-19	16:53:26	16:55:56		12		11	11	10	77	-1
LVC111	1	C	3	161.915	2021-05-19	16:56:50	16:59:20		12		11	11	10	77	-1
LVC111	1	A	1	722.829	2021-07-20	09:58:54	10:01:24		16		17	17	17	44	-45
LVC111	1	A	2	823.123	2021-07-20	10:02:49	10:05:19		16		17	17	17	44	-45
LVC111	1	A	3	352.949	2021-07-20	10:06:35	10:09:05		16		17	17	17	44	-45
LVC111	1	B	1	455.512	2021-07-20	10:11:17	10:13:47		17		18	17	17	56	-40
LVC111	1	B	2	461.51	2021-07-20	10:15:02	10:17:32		17		18	17	17	56	-40
LVC111	1	B	3	661.129	2021-07-20	10:18:48	10:21:18		17		18	17	17	56	-40
LVC111	1	C	1	328.83	2021-07-20	10:23:49	10:26:19		17		18	18	17	57	-40
LVC111	1	C	2	646.209	2021-07-20	10:27:37	10:30:07		17		18	18	17	57	-40
LVC111	1	C	3	2804.98	2021-07-20	10:31:27	10:33:57		17		18	18	17	57	-40
LVC111	1	A	1	946.895	2021-08-23	11:49:54	11:52:24		13		14	14	14	39	-36
LVC111	1	A	2	519.657	2021-08-23	11:53:11	11:55:40		13		14	14	14	39	-36
LVC111	1	A	3	366.604	2021-08-23	11:56:24	11:58:54		13		14	14	14	39	-36
LVC111	1	B	1	241.06	2021-08-23	12:00:05	12:02:35		13		14	14	14	55	-31
LVC111	1	B	2	328.55	2021-08-23	12:03:18	12:05:48		13		14	14	14	55	-31
LVC111	1	B	3	670.561	2021-08-23	12:06:30	12:08:59		13		14	14	14	55	-31
LVC111	1	C	1	264.29	2021-08-23	12:10:16	12:12:45		13		14	14	14	66	-26
LVC111	1	C	2	352.516	2021-08-23	12:13:32	12:16:01		13		14	14	14	66	-26
LVC111	1	C	3	534.57	2021-08-23	12:16:42	12:19:12		13		14	14	14	66	-26
LVC111	1	A	1	247.558	2021-09-23	14:10:37	14:13:06		9		10	10	10	51	-33
LVC111	1	A	2	339.734	2021-09-23	14:13:53	14:16:23		9		10	10	10	51	-33
LVC111	1	A	3	124.735	2021-09-23	14:17:08	14:19:38		9		10	10	10	51	-33
LVC111	1	B	1	125.981	2021-09-23	14:20:27	14:22:56		8		10	10	10	58	-27
LVC111	1	B	2	142.918	2021-09-23	14:23:31	14:26:01		8		10	10	10	58	-27
LVC111	1	B	3	233.298	2021-09-23	14:26:49	14:29:18		8		10	10	10	58	-27
LVC111	1	C	1	406.578	2021-09-23	14:30:21	14:32:50		9		10	10	11	63	-27
LVC111	1	C	2	178.591	2021-09-23	14:33:29	14:35:59		9		10	10	11	63	-27
LVC111	1	C	3	482.677	2021-09-23	14:36:36	14:39:05		9		10	10	11	63	-27
LVC111	1	A	1	96.2361	2021-04-20	13:10:54	13:13:24		6		6	5	5	79	-4
LVC111	1	A	2	191.821	2021-04-20	13:15:15	13:17:45		6		6	5	5	79	-4
LVC111	1	A	3	83.303	2021-04-20	13:18:46	13:21:16		6		6	5	5	79	-4
LVC111	1	B	1	125.717	2021-04-20	13:25:43	13:28:13		4		5	3	3	78	-3
LVC111	1	B	2	103.804	2021-04-20	13:29:24	13:31:54		4		5	3	3	78	-3
LVC111	1	B	3	104.879	2021-04-20	13:33:08	13:35:38		4		5	3	3	78	-3
LVC111	1	C	1	131.854	2021-04-20	13:43:52	13:46:22		6		7	5	5	78	-1
LVC111	1	C	2	80.3967	2021-04-20	13:47:31	13:50:01		6		7	5	5	78	-1
LVC111	1	C	3	70.7865	2021-04-20	13:51:13	13:54:38		6		7	5	5	78	-1
LVC111	1	A	1	1666.85	2022-07-20	12:11:21	12:13:51	14	15		14	14	13	96	0
LVC111	1	A	2	1163.69	2022-07-20	12:14:58	12:17:28	14	15		14	14	13	96	0
LVC111	1	A	3	429.303	2022-07-20	12:18:23	12:20:53	14	15		14	14	13	96	0
LVC111	1	B	1	304.494	2022-07-20	12:22:02	12:24:32	15	15		14	14	13	100	0
LVC111	1	B	2	840.769	2022-07-20	12:25:17	12:27:48	15	15		14	14	13	100	0
LVC111	1	B	3	347.582	2022-07-20	12:28:41	12:31:11	15	15		14	14	13	100	0
LVC111	1	C	1	906.297	2022-07-20	12:32:47	12:35:18	15	15		15	14	14	97	0
LVC111	1	C	2	946.316	2022-07-20	12:36:19	12:38:50	15	15		15	14	14	97	0
LVC111	1	C	3	1724.16	2022-07-20	12:39:51	12:42:21	15	15		15	14	14	97	0
LVC111	1	A	1	1352.85	2022-08-23	11:47:13	11:49:44	18	18		17	16	15	7	0
LVC111	1	A	2	1099.24	2022-08-23	11:51:26	11:53:56	18	18		17	16	15	7	0
LVC111	1	A	3	632.455	2022-08-23	11:58:00	12:00:31	18	18		17	16	15	7	0
LVC111	1	B	1	330.318	2022-08-23	12:01:42	12:04:22	18	18		17	16	15	27	0
LVC111	1	B	2	692.933	2022-08-23	12:04:59	12:07:30	18	18		17	16	15	27	0
LVC111	1	B	3	993.302	2022-08-23	12:08:46	12:11:19	18	18		17	16	15	27	0
LVC111	1	C	1	1227.09	2022-08-23	12:13:15	12:15:45	18	18		17	16	15	6	0
LVC111	1	C	2	831.244	2022-08-23	12:17:09	12:19:39	18	18		17	16	15	6	0
LVC111	1	C	3	2718.25	2022-08-23	12:20:36	12:23:06	18	18		17	16	15	6	0
LVC111	1	A	1	640.606	2022-09-20	15:25:02	15:27:37	10	11		11	11	11	60	0
LVC111	1	A	2	615.53	2022-09-20	15:28:23	15:30:53	10	11		11	11	11	60	0
LVC111	1	A	3	288.834	2022-09-20	15:31:44	15:34:14	10	11		11	11	11	60	0
LVC111	1	B	1	310.386	2022-09-20	15:35:20	15:37:50	10	11		11	11	11	96	0
LVC111	1	B	2	474.933	2022-09-20	15:38:33	15:41:03	10	11		11	11	11	96	0
LVC111	1	B	3	550.576	2022-09-20	15:41:49	15:44:19	10	11		11	11	11	96	0
LVC111	1	C	1	285.56	2022-09-20	15:45:22	15:47:52	10	11		11	11	11	96	0
LVC111	1	C	2	461.932	2022-09-20	15:48:40	15:51:11	10	11		11	11	11	96	0
LVC111	1	C	3	1011.21	2022-09-20	15:52:02	15:54:32	10	11		11	11	11	96	0
LVC111	1	A	1	179.952	2022-10-20	15:54:21	15:56:51	6	7		8	9	9	99	0
LVC111	1	A	2	79.2648	2022-10-20	15:57:38	16:00:08	6	7		8	9	9	99	0
LVC111	1	A	3	40.3717	2022-10-20	16:00:49	16:03:19	6	7		8	9	9	99	0
LVC111	1	B	1	129.115	2022-10-20	16:04:53	16:07:23	7	7		7	8	9	100	0
LVC111	1	B	2	164.754	2022-10-20	16:08:16	16:10:46	7	7		7	8	9	100	0
LVC111	1	B	3	160.054	2022-10-20	16:11:38	16:14:08	7	7		7	8	9	100	0
LVC111	1	C	1	43.0979	2022-10-20	16:15:36	16:18:06	6	7		8	8	9	98	0
LVC111	1	C	2	56.6897	2022-10-20	16:18:57	16:21:27	6	7		8	8	9	98	0
LVC111	1	C	3	81.5011	2022-10-20	16:22:11	16:25:08	6	7		8	8	9	98	0
LVC112	1	A	1	208.495	2021-10-21	09:57:11	09:59:40		8		7	7	8	66	-41
LVC112	1	A	2	168.425	2021-10-21	10:00:25	10:02:54		8		7	7	8	66	-41
LVC112	1	A	3	137.087	2021-10-21	10:03:35	10:06:05		8		7	7	8	66	-41
LVC112	1	B	1	41.9337	2021-10-21	10:07:06	10:09:35		8		8	8	8	48	-47
LVC112	1	B	2	54.7056	2021-10-21	10:10:12	10:12:42		8		8	8	8	48	-47
LVC112	1	B	3	48.0518	2021-10-21	10:13:21	10:15:51		8		8	8	8	48	-47
LVC112	1	C	1	164.507	2021-10-21	10:16:42	10:19:11		8		8	7	8	70	-45
LVC112	1	C	2	80.0449	2021-10-21	10:19:46	10:22:16		8		8	7	8	70	-45
LVC112	1	C	3	50.594	2021-10-21	10:22:52	10:25:22		8		8	7	8	70	-45
LVC112	1	A	1	77.9335	2022-05-26	11:28:15	11:30:46	11	11		12	9	8	98	-9
LVC112	1	A	2	92.485	2022-05-26	11:31:30	11:34:00	11	11		12	9	8	98	-9
LVC112	1	A	3	68.8701	2022-05-26	11:34:44	11:37:14	11	11		12	9	8	98	-9
LVC112	1	B	1	54.2161	2022-05-26	11:38:28	11:40:58	11	11		12	9	7	96	-5
LVC112	1	B	2	74.6315	2022-05-26	11:41:47	11:44:18	11	11		12	9	7	96	-5
LVC112	1	B	3	49.9435	2022-05-26	11:44:56	11:47:26	11	11		12	9	7	96	-5
LVC112	1	C	1	98.0629	2022-05-26	11:48:27	11:50:57	12	11		12	10	8	96	-8
LVC112	1	C	2	67.2978	2022-05-26	11:51:40	11:54:10	12	11		12	10	8	96	-8
LVC112	1	C	3	63.9112	2022-05-26	11:54:51	11:57:22	12	11		12	10	8	96	-8
LVC112	1	A	1	289.465	2022-06-27	11:05:43	11:08:14	19	19		17	14	12	94	-24
LVC112	1	A	2	358.035	2022-06-27	11:09:25	11:11:55	19	19		17	14	12	94	-24
LVC112	1	A	3	1001.6	2022-06-27	11:13:05	11:15:36	19	19		17	14	12	94	-24
LVC112	1	B	1	110.23	2022-06-27	11:17:34	11:20:05	19	17		15	13	11	94	-19
LVC112	1	B	2	131.288	2022-06-27	11:21:17	11:23:48	19	17		15	13	11	94	-19
LVC112	1	B	3	117.399	2022-06-27	11:24:51	11:27:21	19	17		15	13	11	94	-19
LVC112	1	C	1	1260.41	2022-06-27	11:28:35	11:31:06	20	18		16	14	12	95	-21
LVC112	1	C	2	217.861	2022-06-27	11:32:21	11:34:52	20	18		16	14	12	95	-21
LVC112	1	C	3	106.019	2022-06-27	11:35:49	11:38:19	20	18		16	14	12	95	-21
LVC112	1	A	1	306.196	2022-07-22	09:20:25	09:22:56	17	17		16	15	14	96	-28
LVC112	1	A	2	553.871	2022-07-22	09:23:52	09:26:23	17	17		16	15	14	96	-28
LVC112	1	A	3	1112.58	2022-07-22	09:27:09	09:29:40	17	17		16	15	14	96	-28
LVC112	1	B	1	82.8901	2022-07-22	09:31:58	09:34:29	16	16		15	14	13	94	-21
LVC112	1	B	2	140.444	2022-07-22	09:35:28	09:37:59	16	16		15	14	13	94	-21
LVC112	1	B	3	82.2147	2022-07-22	09:39:01	09:41:32	16	16		15	14	13	94	-21
LVC112	1	C	1	1724.88	2022-07-22	09:42:34	09:45:04	16	16		16	14	14	95	-22
LVC112	1	C	2	392.273	2022-07-22	09:46:02	09:48:32	16	16		16	14	14	95	-22
LVC112	1	C	3	64.3828	2022-07-22	09:49:38	09:52:08	16	16		16	14	14	95	-22
LVC112	1	A	1	455.662	2022-08-24	09:26:41	09:29:11	17	17		17	16	15	37	-52
LVC112	1	A	2	838.494	2022-08-24	09:29:59	09:32:29	17	17		17	16	15	37	-52
LVC112	1	A	3	1201.09	2022-08-24	09:33:40	09:36:10	17	17		17	16	15	37	-52
LVC112	1	B	1	128.711	2022-08-24	09:37:19	09:39:49	17	17		17	15	14	93	-40
LVC112	1	B	2	156.19	2022-08-24	09:40:41	09:43:11	17	17		17	15	14	93	-40
LVC112	1	B	3	99.204	2022-08-24	09:44:09	09:46:39	17	17		17	15	14	93	-40
LVC112	1	C	1	584.669	2022-08-24	09:47:46	09:50:17	17	18		17	16	15	6	-38
LVC112	1	C	2	619.761	2022-08-24	09:51:04	09:53:35	17	18		17	16	15	6	-38
LVC112	1	C	3	70.5293	2022-08-24	09:54:32	09:57:03	17	18		17	16	15	6	-38
LVC112	1	A	1	137.032	2022-09-22	11:20:32	11:23:02	9	11		11	11	10	89	-29
LVC112	1	A	2	200.341	2022-09-22	11:24:02	11:26:32	9	11		11	11	10	89	-29
LVC112	1	A	3	556.534	2022-09-22	11:27:17	11:29:47	9	11		11	11	10	89	-29
LVC112	1	B	1	40.4569	2022-09-22	11:31:15	11:33:45	10	11		11	11	10	95	-17
LVC112	1	B	2	51.6593	2022-09-22	11:34:26	11:36:56	10	11		11	11	10	95	-17
LVC112	1	B	3	21.2841	2022-09-22	11:37:41	11:40:11	10	11		11	11	10	95	-17
LVC112	1	C	1	191.55	2022-09-22	11:41:06	11:43:37	9	11		11	11	10	95	-19
LVC112	1	C	2	393.289	2022-09-22	11:44:19	11:46:49	9	11		11	11	10	95	-19
LVC112	1	C	3	45.8881	2022-09-22	11:47:34	11:50:04	9	11		11	11	10	95	-19
LVC112	1	A	1	56.0376	2022-10-26	10:33:32	10:36:02	6	7		7	8	8	86	-34
LVC112	1	A	2	70.2513	2022-10-26	10:36:44	10:39:14	6	7		7	8	8	86	-34
LVC112	1	A	3	82.0872	2022-10-26	10:39:56	10:42:27	6	7		7	8	8	86	-34
LVC112	1	B	1	28.2795	2022-10-26	10:43:46	10:46:17	6	7		7	7	8	94	-8
LVC112	1	B	2	43.8816	2022-10-26	10:47:00	10:49:30	6	7		7	7	8	94	-8
LVC112	1	B	3	26.0014	2022-10-26	10:50:10	10:52:40	6	7		7	7	8	94	-8
LVC112	1	C	1	36.3588	2022-10-26	10:53:31	10:56:02	7	8		8	8	9	37	-42
LVC112	1	C	2	47.9788	2022-10-26	10:56:42	10:59:12	7	8		8	8	9	37	-42
LVC112	1	C	3	16.8805	2022-10-26	10:59:46	11:02:17	7	8		8	8	9	37	-42
LVC112	1	A	1	95.7836	2021-05-20	09:29:49	09:32:19		9		9	9	8	73	-16
LVC112	1	A	2	117.498	2021-05-20	09:32:59	09:35:29		9		9	9	8	73	-16
LVC112	1	A	3	249.345	2021-05-20	09:36:00	09:38:50		9		9	9	8	73	-16
LVC112	1	B	1	28.9357	2021-05-20	09:40:00	09:43:17		9		9	8	8	74	-9
LVC112	1	B	2	70.1243	2021-05-20	09:44:09	09:46:39		9		9	8	8	74	-9
LVC112	1	B	3	57.7765	2021-05-20	09:47:17	09:49:47		9		9	8	8	74	-9
LVC112	1	C	1	119.327	2021-05-20	09:52:55	09:55:25		9		9	8	8	71	-9
LVC112	1	C	2	147.422	2021-05-20	09:56:04	09:58:34		9		9	8	8	71	-9
LVC112	1	C	3	62.1395	2021-05-20	09:59:17	10:01:47		9		9	8	8	71	-9
LVC112	1	A	1	36.5213	2021-07-20	16:01:01	16:03:28		17		16	16	15	61	-59
LVC112	1	A	2		2021-07-20	16:06:06	16:06:54		17		16	16	15	61	-59
LVC112	1	A	3	958.927	2021-07-20	16:11:17	16:13:47		17		16	16	15	61	-59
LVC112	1	B	1	144.909	2021-07-20	16:17:04	16:19:34		15		14	14	13	25	-73
LVC112	1	B	2	129.492	2021-07-20	16:21:31	16:24:01		15		14	14	13	25	-73
LVC112	1	B	3	104.802	2021-07-20	16:27:27	16:29:56		15		14	14	13	25	-73
LVC112	1	C	1	1556.16	2021-07-20	16:32:13	16:34:43		17		16	15	15	65	-54
LVC112	1	C	2	315.042	2021-07-20	16:35:53	16:38:22		17		16	15	15	65	-54
LVC112	1	C	3	120.862	2021-07-20	16:39:17	16:41:47		17		16	15	15	65	-54
LVC112	1	A	1	296.652	2021-08-25	09:38:38	09:41:08		12		13	12	12	67	-56
LVC112	1	A	2	248.5	2021-08-25	09:41:49	09:44:19		12		13	12	12	67	-56
LVC112	1	A	3	464.428	2021-08-25	09:45:11	09:47:40		12		13	12	12	67	-56
LVC112	1	B	1	108.751	2021-08-25	09:49:09	09:51:38		11		12	11	11	40	-80
LVC112	1	B	2	134.069	2021-08-25	09:52:27	09:54:56		11		12	11	11	40	-80
LVC112	1	B	3	84.5145	2021-08-25	09:55:37	09:58:07		11		12	11	11	40	-80
LVC112	1	C	1	1790.49	2021-08-25	09:59:32	10:02:02		12		13	12	12	70	-46
LVC112	1	C	2	188.113	2021-08-25	10:02:50	10:05:20		12		13	12	12	70	-46
LVC112	1	C	3	107.161	2021-08-25	10:05:57	10:08:26		12		13	12	12	70	-46
LVC112	1	A	1	195.414	2021-09-24	09:52:03	09:54:33		8		9	9	9	73	-28
LVC112	1	A	2	220.49	2021-09-24	09:55:16	09:57:45		8		9	9	9	73	-28
LVC112	1	A	3	240.54	2021-09-24	09:58:47	10:01:16		8		9	9	9	73	-28
LVC112	1	B	1	59.8828	2021-09-24	10:02:23	10:04:53		8		9	9	10	53	-41
LVC112	1	B	2	83.7841	2021-09-24	10:05:31	10:08:00		8		9	9	10	53	-41
LVC112	1	B	3	60.2738	2021-09-24	10:08:47	10:11:16		8		9	9	10	53	-41
LVC112	1	C	1	310.315	2021-09-24	10:12:14	10:14:44		8		9	9	10	72	-30
LVC112	1	C	2	131.127	2021-09-24	10:15:38	10:18:07		8		9	9	10	72	-30
LVC112	1	C	3	46.7705	2021-09-24	10:18:49	10:21:18		8		9	9	10	72	-30
LVC112	1	A	1	194.317	2021-04-21	15:29:21	15:31:51		5		6	5	5	72	-34
LVC112	1	A	2	285.188	2021-04-21	15:33:05	15:35:35		5		6	5	5	72	-34
LVC112	1	A	3	773.794	2021-04-21	15:36:46	15:39:16		5		6	5	5	72	-34
LVC112	1	B	1	111.204	2021-04-21	15:44:20	15:46:50		7		6	5	5	67	-22
LVC112	1	B	2	150.008	2021-04-21	15:47:38	15:50:08		7		6	5	5	67	-22
LVC112	1	B	3	115.07	2021-04-21	15:50:52	15:53:21		7		6	5	5	67	-22
LVC112	1	C	1	581.901	2021-04-21	15:58:18	16:00:48		6		7	5	5	70	-21
LVC112	1	C	2	444.297	2021-04-21	16:05:02	16:07:32		6		7	5	5	70	-21
LVC112	1	C	3	370.225	2021-04-21	16:08:49	16:12:09		6		7	5	5	70	-21
LVC308	1	A	1	9.00833	2021-10-25	16:16:08	16:18:38		6		7	7	8	31	-97
LVC308	1	A	2	38.4773	2021-10-25	16:19:24	16:21:53		6		7	7	8	31	-97
LVC308	1	A	3	91.4723	2021-10-25	16:22:30	16:25:00		6		7	7	8	31	-97
LVC308	1	B	1	38.87	2021-10-25	16:26:13	16:28:43		5		7	7	8	37	-107
LVC308	1	B	2	24.6497	2021-10-25	16:29:21	16:31:50		5		7	7	8	37	-107
LVC308	1	B	3	19.7685	2021-10-25	16:32:28	16:34:58		5		7	7	8	37	-107
LVC308	1	C	1	18.6697	2021-10-25	16:35:43	16:38:12		6		7	7	8	46	-73
LVC308	1	C	2	8.23675	2021-10-25	16:39:03	16:41:33		6		7	7	8	46	-73
LVC308	1	C	3	10.9641	2021-10-25	16:42:12	16:44:41		6		7	7	8	46	-73
LVC308	1	A	1	40.1278	2022-05-24	09:19:08	09:21:38		7		8	6	6	73	-17
LVC308	1	A	2	78.3114	2022-05-24	09:23:07	09:25:37		7		8	6	6	73	-17
LVC308	1	A	3	56.9381	2022-05-24	09:26:30	09:29:00		7		8	6	6	73	-17
LVC308	1	B	1	66.5272	2022-05-24	09:30:14	09:32:44		8		8	7	6	36	-31
LVC308	1	B	2	35.6306	2022-05-24	09:33:47	09:36:17		8		8	7	6	36	-31
LVC308	1	B	3	84.9957	2022-05-24	09:37:05	09:39:36		8		8	7	6	36	-31
LVC308	1	C	1	43.7159	2022-05-24	09:40:36	09:43:07		7		7	6	5	88	-23
LVC308	1	C	2	39.94	2022-05-24	09:43:52	09:46:23		7		7	6	5	88	-23
LVC308	1	C	3	43.0647	2022-05-24	09:47:11	09:49:41		7		7	6	5	88	-23
LVC308	1	A	1	156.943	2022-06-20	10:50:59	10:53:30	11	11		12	10	10	89	-18
LVC308	1	A	2	239.911	2022-06-20	10:54:46	10:57:17	11	11		12	10	10	89	-18
LVC308	1	A	3	196.943	2022-06-20	10:58:35	11:01:06	11	11		12	10	10	89	-18
LVC308	1	B	1	102.347	2022-06-20	11:03:38	11:06:08	12	12		13	10	10	34	-32
LVC308	1	B	2	88.3885	2022-06-20	11:07:18	11:09:48	12	12		13	10	10	34	-32
LVC308	1	B	3	171.543	2022-06-20	11:10:47	11:13:17	12	12		13	10	10	34	-32
LVC308	1	C	1	101.448	2022-06-20	11:14:37	11:17:07	11	11		12	9	9	74	-24
LVC308	1	C	2	122.523	2022-06-20	11:18:09	11:20:39	11	11		12	9	9	74	-24
LVC308	1	C	3	122.742	2022-06-20	11:21:42	11:24:12	11	11		12	9	9	74	-24
LVC308	1	A	1	185.004	2022-07-19	15:39:25	15:41:56	15	14		13	13	12	66	-21
LVC308	1	A	2	242.173	2022-07-19	15:42:48	15:45:18	15	14		13	13	12	66	-21
LVC308	1	A	3	147.106	2022-07-19	15:45:59	15:48:29	15	14		13	13	12	66	-21
LVC308	1	B	1	138.513	2022-07-19	15:49:53	15:52:23	16	15		14	13	12	37	-35
LVC308	1	B	2	167.96	2022-07-19	15:53:04	15:55:35	16	15		14	13	12	37	-35
LVC308	1	B	3	185.139	2022-07-19	15:56:21	15:58:51	16	15		14	13	12	37	-35
LVC308	1	C	1	131.954	2022-07-19	16:00:18	16:02:48	16	14		13	12	12	89	-28
LVC308	1	C	2	152.872	2022-07-19	16:03:27	16:05:57	16	14		13	12	12	89	-28
LVC308	1	C	3	115.235	2022-07-19	16:06:51	16:09:21	16	14		13	12	12	89	-28
LVC308	1	A	1	437.458	2022-08-22	16:16:29	16:18:59	18	17		16	15	14	8	-43
LVC308	1	A	2	525.893	2022-08-22	16:20:17	16:22:47	18	17		16	15	14	8	-43
LVC308	1	A	3	530.53	2022-08-22	16:23:56	16:26:26	18	17		16	15	14	8	-43
LVC308	1	B	1	280.787	2022-08-22	16:27:35	16:30:05	18	18		16	15	14	6	-55
LVC308	1	B	2	317.916	2022-08-22	16:31:27	16:33:57	18	18		16	15	14	6	-55
LVC308	1	B	3	347.11	2022-08-22	16:34:36	16:37:07	18	18		16	15	14	6	-55
LVC308	1	C	1	154.058	2022-08-22	16:38:23	16:40:54	18	17		16	15	13	77	-47
LVC308	1	C	2	214.196	2022-08-22	16:41:37	16:44:08	18	17		16	15	13	77	-47
LVC308	1	C	3	348.267	2022-08-22	16:44:49	16:47:19	18	17		16	15	13	77	-47
LVC308	1	A	1	100.208	2022-09-19	16:54:52	16:57:23	10	11		11	11	11	42	-35
LVC308	1	A	2	132.363	2022-09-19	16:58:03	17:00:33	10	11		11	11	11	42	-35
LVC308	1	A	3	108.699	2022-09-19	17:01:16	17:03:46	10	11		11	11	11	42	-35
LVC308	1	B	1	114.11	2022-09-19	17:04:48	17:07:19	11	11		12	12	11	33	-48
LVC308	1	B	2	87.5988	2022-09-19	17:07:57	17:10:27	11	11		12	12	11	33	-48
LVC308	1	B	3	179.439	2022-09-19	17:11:23	17:13:53	11	11		12	12	11	33	-48
LVC308	1	C	1	93.1675	2022-09-19	17:14:46	17:17:17	11	11		11	11	11	87	-38
LVC308	1	C	2	95.5939	2022-09-19	17:17:59	17:20:29	11	11		11	11	11	87	-38
LVC308	1	C	3	149.658	2022-09-19	17:21:11	17:23:41	11	11		11	11	11	87	-38
LVC308	1	A	1	108.256	2022-10-20	09:44:19	09:46:49	5	7		9	9	9	58	-28
LVC308	1	A	2	82.1803	2022-10-20	09:47:53	09:50:23	5	7		9	9	9	58	-28
LVC308	1	A	3	112.222	2022-10-20	09:51:39	09:54:09	5	7		9	9	9	58	-28
LVC308	1	B	1	86.7227	2022-10-20	09:55:53	09:58:23	4	6		8	9	9	31	-41
LVC308	1	B	2	71.3867	2022-10-20	09:59:18	10:01:48	4	6		8	9	9	31	-41
LVC308	1	B	3	139.62	2022-10-20	10:02:36	10:05:06	4	6		8	9	9	31	-41
LVC308	1	C	1	62.8874	2022-10-20	10:06:11	10:08:41	4	7		8	9	9	86	-34
LVC308	1	C	2	39.5061	2022-10-20	10:09:36	10:12:06	4	7		8	9	9	86	-34
LVC308	1	C	3	69.8052	2022-10-20	10:12:49	10:15:19	4	7		8	9	9	86	-34
LVC308	1	A	1	59.9011	2021-05-19	11:20:03	11:22:33		9		8	6	6	39	-28
LVC308	1	A	2	182.302	2021-05-19	11:23:39	11:26:08		9		8	6	6	39	-28
LVC308	1	A	3	89.9841	2021-05-19	11:26:50	11:29:20		9		8	6	6	39	-28
LVC308	1	B	1	116.523	2021-05-19	11:31:29	11:33:59		10		8	7	6	36	-43
LVC308	1	B	2	90.4074	2021-05-19	11:34:49	11:37:18		10		8	7	6	36	-43
LVC308	1	B	3	148.144	2021-05-19	11:38:17	11:40:47		10		8	7	6	36	-43
LVC308	1	C	1	103.463	2021-05-19	11:43:25	11:45:55		9		8	6	6	50	-35
LVC308	1	C	2	98.8506	2021-05-19	11:46:34	11:49:04		9		8	6	6	50	-35
LVC308	1	C	3	94.3144	2021-05-19	11:49:43	11:52:13		9		8	6	6	50	-35
LVC308	1	A	1	371.943	2021-07-19	12:34:21	12:36:51		17		16	15	15	32	-75
LVC308	1	A	2	466.765	2021-07-19	12:38:44	12:41:14		17		16	15	15	32	-75
LVC308	1	A	3	382.491	2021-07-19	12:42:35	12:45:05		17		16	15	15	32	-75
LVC308	1	B	1	211.608	2021-07-19	12:49:11	12:51:41		16		16	15	15	18	-90
LVC308	1	B	2	152.285	2021-07-19	12:53:11	12:55:41		16		16	15	15	18	-90
LVC308	1	B	3	295.444	2021-07-19	12:57:04	12:59:34		16		16	15	15	18	-90
LVC308	1	C	1	145.898	2021-07-19	13:02:59	13:05:29		17		17	15	15	38	-83
LVC308	1	C	2	162.086	2021-07-19	13:06:42	13:09:12		17		17	15	15	38	-83
LVC308	1	C	3	164.714	2021-07-19	13:10:43	13:13:13		17		17	15	15	38	-83
LVC308	1	A	1	364.123	2021-08-20	09:51:51	09:54:21		14		14	14	13	41	-82
LVC308	1	A	2	415.564	2021-08-20	09:55:07	09:57:36		14		14	14	13	41	-82
LVC308	1	A	3	349.745	2021-08-20	09:58:24	10:00:53		14		14	14	13	41	-82
LVC308	1	B	1	202.559	2021-08-20	10:03:02	10:05:31		14		14	13	13	31	-104
LVC308	1	B	2	161.577	2021-08-20	10:06:12	10:08:41		14		14	13	13	31	-104
LVC308	1	B	3	276.636	2021-08-20	10:09:38	10:12:08		14		14	13	13	31	-104
LVC308	1	C	1	162.856	2021-08-20	10:13:51	10:16:21		14		14	14	14	52	-60
LVC308	1	C	2	167.585	2021-08-20	10:17:24	10:19:54		14		14	14	14	52	-60
LVC308	1	C	3	138.931	2021-08-20	10:20:33	10:23:03		14		14	14	14	52	-60
LVC308	1	A	1	65.8059	2021-09-22	16:34:32	16:37:02		8		9	10	10	28	-85
LVC308	1	A	2	63.7054	2021-09-22	16:37:52	16:40:21		8		9	10	10	28	-85
LVC308	1	A	3	63.1036	2021-09-22	16:41:13	16:43:43		8		9	10	10	28	-85
LVC308	1	B	1	25.0808	2021-09-22	16:45:12	16:47:42		8		9	9	10	27	-87
LVC308	1	B	2	14.4435	2021-09-22	16:48:13	16:50:42		8		9	9	10	27	-87
LVC308	1	B	3	13.5901	2021-09-22	16:51:20	16:53:50		8		9	9	10	27	-87
LVC308	1	C	1	58.6552	2021-09-22	16:54:46	16:57:15		8		9	9	10	38	-77
LVC308	1	C	2	70.4363	2021-09-22	16:58:06	17:00:35		8		9	9	10	38	-77
LVC308	1	C	3	83.5809	2021-09-22	17:01:17	17:03:47		8		9	9	10	38	-77
LVC308	1	A	1	99.0828	2021-04-16	10:16:16	10:18:46		3		3	2	2	43	-23
LVC308	1	A	2	135.563	2021-04-16	10:19:55	10:22:25		3		3	2	2	43	-23
LVC308	1	A	3	53.3997	2021-04-16	10:23:28	10:25:58		3		3	2	2	43	-23
LVC308	1	B	1	84.6772	2021-04-16	10:34:03	10:36:33		2		1	1	2	35	-42
LVC308	1	B	2	96.8298	2021-04-16	10:37:23	10:39:53		2		1	1	2	35	-42
LVC308	1	B	3	118.599	2021-04-16	10:40:47	10:43:17		2		1	1	2	35	-42
LVC308	1	C	1	87.3225	2021-04-16	10:52:31	10:55:01		3		3	2	2	54	-32
LVC308	1	C	2	77.9697	2021-04-16	10:56:03	10:58:33		3		3	2	2	54	-32
LVC308	1	C	3	99.451	2021-04-16	10:59:40	11:03:26		3		3	2	2	54	-32
LVC309	1	A	1	23.9512	2021-10-25	13:35:00	13:37:30		4		5	6	7	78	-5
LVC309	1	A	2	38.3898	2021-10-25	13:38:10	13:40:39		4		5	6	7	78	-5
LVC309	1	A	3	29.3776	2021-10-25	13:41:17	13:43:47		4		5	6	7	78	-5
LVC309	1	B	1	61.048	2021-10-25	13:44:45	13:47:14		6		7	7	8	66	-10
LVC309	1	B	2	56.5311	2021-10-25	13:47:53	13:50:23		6		7	7	8	66	-10
LVC309	1	B	3	51.7535	2021-10-25	13:51:01	13:53:30		6		7	7	8	66	-10
LVC309	1	C	1	63.0112	2021-10-25	13:54:23	13:56:52		5		6	6	7	77	-7
LVC309	1	C	2	38.7444	2021-10-25	13:57:40	14:00:10		5		6	6	7	77	-7
LVC309	1	C	3	46.2685	2021-10-25	14:00:53	14:03:22		5		6	6	7	77	-7
LVC309	1	A	1	76.8257	2022-05-23	14:41:05	14:43:36	17	12		15	9	8	99	-1
LVC309	1	A	2	67.5429	2022-05-23	14:44:24	14:46:54	17	12		15	9	8	99	-1
LVC309	1	A	3	68.7157	2022-05-23	14:47:52	14:50:23	17	12		15	9	8	99	-1
LVC309	1	B	1	853.248	2022-05-23	14:52:03	14:52:34	11	9		11	7	7	100	-4
LVC309	1	B	2	112.112	2022-05-23	14:55:25	14:57:56	11	9		11	7	7	100	-4
LVC309	1	B	3	107.884	2022-05-23	14:58:49	15:01:20	11	9		11	7	7	100	-4
LVC309	1	C	1	115.302	2022-05-23	15:02:56	15:05:26	15	10		12	8	8	100	0
LVC309	1	C	2	130.412	2022-05-23	15:06:14	15:08:44	15	10		12	8	8	100	0
LVC309	1	C	3	129.579	2022-05-23	15:09:28	15:11:58	15	10		12	8	8	100	0
LVC309	1	A	1	126.62	2022-06-22	12:42:06	12:44:37	18	17		19	14	13	99	-2
LVC309	1	A	2	1136.8	2022-06-22	12:45:40	12:48:11	18	17		19	14	13	99	-2
LVC309	1	A	3	160.006	2022-06-22	12:49:38	12:52:08	18	17		19	14	13	99	-2
LVC309	1	B	1	257.737	2022-06-22	12:55:23	12:57:53	18	15		16	13		98	-6
LVC309	1	B	2	114.948	2022-06-22	12:59:21	13:01:52	18	15		16	13		98	-6
LVC309	1	B	3	202.255	2022-06-22	13:02:42	13:05:13	18	15		16	13		98	-6
LVC309	1	C	1	159.636	2022-06-22	13:08:01	13:10:32	19	16		19	14	13	96	-1
LVC309	1	C	2	149.031	2022-06-22	13:12:04	13:14:34	19	16		19	14	13	96	-1
LVC309	1	C	3	151.704	2022-06-22	13:15:57	13:18:27	19	16		19	14	13	96	-1
LVC309	1	A	1	61.3525	2021-05-17	14:05:54	14:08:24		10		8	7	6	77	-3
LVC309	1	A	2	102.371	2021-05-17	14:08:59	14:11:29		10		8	7	6	77	-3
LVC309	1	A	3	64.2584	2021-05-17	14:12:22	14:14:52		10		8	7	6	77	-3
LVC309	1	B	1	214.223	2021-05-17	14:17:27	14:19:56		8		8	6	5	77	-8
LVC309	1	B	2	126.297	2021-05-17	14:20:38	14:23:08		8		8	6	5	77	-8
LVC309	1	B	3	91.6229	2021-05-17	14:24:13	14:26:43		8		8	6	5	77	-8
LVC309	1	C	1	235.25	2021-05-17	14:30:53	14:33:22		10		8	7	7	76	-5
LVC309	1	C	2	115.344	2021-05-17	14:34:03	14:36:33		10		8	7	7	76	-5
LVC309	1	C	3	125.472	2021-05-17	14:37:26	14:39:56		10		8	7	7	76	-5
LVC309	1	A	1	401.073	2021-07-16	13:00:44	13:03:14		20		18	16	15	63	-45
LVC309	1	A	2	501.684	2021-07-16	13:03:50	13:06:20		20		18	16	15	63	-45
LVC309	1	A	3	393.482	2021-07-16	13:07:09	13:09:39		20		18	16	15	63	-45
LVC309	1	B	1	1162.82	2021-07-16	13:10:58	13:13:28		19		17	15	14	30	-53
LVC309	1	B	2	2349.63	2021-07-16	13:14:40	13:17:10		19		17	15	14	30	-53
LVC309	1	B	3	997.13	2021-07-16	13:18:10	13:20:40		19		17	15	14	30	-53
LVC309	1	C	1	1189.17	2021-07-16	13:22:21	13:24:51		19		17	16	15	63	-48
LVC309	1	C	2	917.274	2021-07-16	13:25:33	13:28:03		19		17	16	15	63	-48
LVC309	1	C	3	1299.06	2021-07-16	13:28:53	13:31:23		19		17	16	15	63	-48
LVC309	1	A	1	102.99	2021-08-18	12:50:24	12:52:54		14		14	14	13	76	-6
LVC309	1	A	2	108.824	2021-08-18	12:53:27	12:55:57		14		14	14	13	76	-6
LVC309	1	A	3	85.0689	2021-08-18	12:56:43	12:59:13		14		14	14	13	76	-6
LVC309	1	B	1	202.138	2021-08-18	13:00:37	13:03:07		14		14	14	14	56	-10
LVC309	1	B	2	157.223	2021-08-18	13:04:02	13:06:32		14		14	14	14	56	-10
LVC309	1	B	3	109.203	2021-08-18	13:07:18	13:09:48		14		14	14	14	56	-10
LVC309	1	C	1	286.113	2021-08-18	13:11:16	13:13:46		14		14	14	14	75	-7
LVC309	1	C	2	133.133	2021-08-18	13:14:28	13:16:58		14		14	14	14	75	-7
LVC309	1	C	3	195.16	2021-08-18	13:17:47	13:20:17		14		14	14	14	75	-7
LVC309	1	A	1	76.1773	2021-09-22	13:28:52	13:31:21		7		8	8	9	59	-14
LVC309	1	A	2	91.6936	2021-09-22	13:32:01	13:34:31		7		8	8	9	59	-14
LVC309	1	A	3	61.8203	2021-09-22	13:35:12	13:37:41		7		8	8	9	59	-14
LVC309	1	B	1	219.94	2021-09-22	13:38:39	13:41:09		8		9	10	10	62	-21
LVC309	1	B	2	237.374	2021-09-22	13:41:55	13:44:24		8		9	10	10	62	-21
LVC309	1	B	3	153.574	2021-09-22	13:45:06	13:47:35		8		9	10	10	62	-21
LVC309	1	C	1	240.624	2021-09-22	13:48:21	13:50:51		8		9	9	9	74	-12
LVC309	1	C	2	110.273	2021-09-22	13:51:26	13:53:55		8		9	9	9	74	-12
LVC309	1	C	3	141.092	2021-09-22	13:54:46	13:57:16		8		9	9	9	74	-12
LVC309	1	A	1	72.1971	2021-04-15	15:30:06	15:32:36		0		0	1	1	78	-6
LVC309	1	A	2	107.782	2021-04-15	15:33:24	15:35:24		0		0	1	1	78	-6
LVC309	1	A	3	68.4625	2021-04-15	15:36:24	15:38:54		0		0	1	1	78	-6
LVC309	1	B	1	399.407	2021-04-15	15:40:05	15:42:35		1		1	1	1	78	-9
LVC309	1	B	2	102.816	2021-04-15	15:43:26	15:45:56		1		1	1	1	78	-9
LVC309	1	B	3	57.2381	2021-04-15	15:46:40	15:49:09		1		1	1	1	78	-9
LVC309	1	C	1	78.6466	2021-04-15	15:50:34	15:53:04		1		1	2	2	76	0
LVC309	1	C	2	52.8248	2021-04-15	15:53:51	15:56:21		1		1	2	2	76	0
LVC309	1	C	3	57.3821	2021-04-15	15:57:00	16:00:17		1		1	2	2	76	0
LVC309	1	A	1	105.091	2022-07-19	12:54:00	12:56:30	18	17		16	15	15	98	0
LVC309	1	A	2	237.86	2022-07-19	12:57:39	13:00:09	18	17		16	15	15	98	0
LVC309	1	A	3	121.06	2022-07-19	13:00:55	13:03:25	18	17		16	15	15	98	0
LVC309	1	B	1	160.902	2022-07-19	13:04:33	13:07:03	18	16		15	15	14	100	0
LVC309	1	B	2	107.288	2022-07-19	13:07:58	13:10:28	18	16		15	15	14	100	0
LVC309	1	B	3	167.613	2022-07-19	13:11:33	13:14:03	18	16		15	15	14	100	0
LVC309	1	C	1	197.109	2022-07-19	13:15:43	13:18:14	19	17		17	16	15	99	0
LVC309	1	C	2	161.908	2022-07-19	13:19:03	13:21:34	19	17		17	16	15	99	0
LVC309	1	C	3	106.835	2022-07-19	13:22:39	13:25:10	19	17		17	16	15	99	0
LVC309	1	A	1	385.533	2022-08-22	13:02:21	13:04:51	18	18		18	17	16	98	0
LVC309	1	A	2	452.436	2022-08-22	13:05:41	13:08:11	18	18		18	17	16	98	0
LVC309	1	A	3	296.046	2022-08-22	13:09:01	13:11:31	18	18		18	17	16	98	0
LVC309	1	B	1	915.756	2022-08-22	13:12:51	13:15:21	18	18		17	17	16	98	0
LVC309	1	B	2	956.097	2022-08-22	13:16:10	13:18:40	18	18		17	17	16	98	0
LVC309	1	B	3	1462.91	2022-08-22	13:19:29	13:21:59	18	18		17	17	16	98	0
LVC309	1	C	1	2917.27	2022-08-22	13:23:08	13:25:21	18	18		18	17	17	36	0
LVC309	1	C	2	1282.96	2022-08-22	13:27:36	13:30:06	18	18		18	17	17	36	0
LVC309	1	C	3	1161.23	2022-08-22	13:30:47	13:33:17	18	18		18	17	17	36	0
LVC309	1	A	1	131.817	2022-09-19	13:51:16	13:53:46	11	12		12	12	12	93	0
LVC309	1	A	2	117.159	2022-09-19	13:54:29	13:56:59	11	12		12	12	12	93	0
LVC309	1	A	3	73.2303	2022-09-19	13:57:42	14:00:12	11	12		12	12	12	93	0
LVC309	1	B	1	83.9298	2022-09-19	14:01:23	14:03:54	12	12		12	12	12	100	0
LVC309	1	B	2	93.1404	2022-09-19	14:04:38	14:07:08	12	12		12	12	12	100	0
LVC309	1	B	3	119.218	2022-09-19	14:07:53	14:10:23	12	12		12	12	12	100	0
LVC309	1	C	1	200.627	2022-09-19	14:11:34	14:14:04	11	11		12	12	12	100	0
LVC309	1	C	2	115.376	2022-09-19	14:14:51	14:17:22	11	11		12	12	12	100	0
LVC309	1	C	3	111.422	2022-09-19	14:18:05	14:20:35	11	11		12	12	12	100	0
LVC309	1	A	1	66.4224	2022-10-19	13:36:38	13:39:08	8	8		9	9	9	100	0
LVC309	1	A	2	59.6558	2022-10-19	13:39:48	13:42:23	8	8		9	9	9	100	0
LVC309	1	A	3	58.8165	2022-10-19	13:43:01	13:45:31	8	8		9	9	9	100	0
LVC309	1	B	1	31.5021	2022-10-19	13:46:46	13:49:16	8	8		8	9	9	100	0
LVC309	1	B	2	44.7812	2022-10-19	13:50:07	13:52:37	8	8		8	9	9	100	0
LVC309	1	B	3	44.7523	2022-10-19	13:53:24	13:55:54	8	8		8	9	9	100	0
LVC309	1	C	1	37.165	2022-10-19	13:57:11	13:59:41	8	8		8	9	9	99	0
LVC309	1	C	2	44.2092	2022-10-19	14:00:42	14:03:12	8	8		8	9	9	99	0
LVC309	1	C	3	96.5209	2022-10-19	14:03:58	14:06:28	8	8		8	9	9	99	0
LVC311	1	A	1	142.745	2021-10-25	11:57:08	11:59:37		5		5	6	7	74	1
LVC311	1	A	2	97.1908	2021-10-25	12:00:47	12:03:17		5		5	6	7	74	1
LVC311	1	A	3	89.7238	2021-10-25	12:03:58	12:06:27		5		5	6	7	74	1
LVC311	1	B	1	67.9931	2021-10-25	12:07:32	12:10:01		6		6	7	7	76	-2
LVC311	1	B	2	63.3589	2021-10-25	12:10:41	12:13:11		6		6	7	7	76	-2
LVC311	1	B	3	47.5719	2021-10-25	12:13:48	12:16:17		6		6	7	7	76	-2
LVC311	1	C	1	147.338	2021-10-25	12:17:14	12:19:44		6		7	7	8	79	0
LVC311	1	C	2	135.062	2021-10-25	12:20:26	12:22:55		6		7	7	8	79	0
LVC311	1	C	3	164.049	2021-10-25	12:23:43	12:26:12		6		7	7	8	79	0
LVC311	1	A	1	832.16	2022-05-23	12:32:27	12:34:57	12	9		11	8	8	98	0
LVC311	1	A	2	423.037	2022-05-23	12:35:50	12:38:20	12	9		11	8	8	98	0
LVC311	1	A	3	112.652	2022-05-23	12:39:15	12:41:45	12	9		11	8	8	98	0
LVC311	1	B	1	111.432	2022-05-23	12:43:30	12:46:01	14	10		12	8	8	99	0
LVC311	1	B	2	118.726	2022-05-23	12:46:52	12:49:23	14	10		12	8	8	99	0
LVC311	1	B	3	107.773	2022-05-23	12:50:10	12:52:41	14	10		12	8	8	99	0
LVC311	1	C	1	248.577	2022-05-23	12:54:32	12:57:02	14	10		13	9	8	97	0
LVC311	1	C	2	262.099	2022-05-23	12:57:55	13:00:25	14	10		13	9	8	97	0
LVC311	1	C	3	216.343	2022-05-23	13:01:22	13:03:53	14	10		13	9	8	97	0
LVC311	1	A	1	394.572	2022-06-22	10:41:55	10:44:25	16	15		16	14	13	92	-2
LVC311	1	A	2	633.398	2022-06-22	10:45:37	10:48:07	16	15		16	14	13	92	-2
LVC311	1	A	3	129.961	2022-06-22	10:49:11	10:51:42	16	15		16	14	13	92	-2
LVC311	1	B	1	111.767	2022-06-22	10:54:21	10:56:52	16	15		16	14	13	98	-1
LVC311	1	B	2	119.812	2022-06-22	10:58:03	11:00:34	16	15		16	14	13	98	-1
LVC311	1	B	3	125.692	2022-06-22	11:01:42	11:04:12	16	15		16	14	13	98	-1
LVC311	1	C	1	735.755	2022-06-22	11:06:41	11:09:11	16	15		16	14	13	100	0
LVC311	1	C	2	501.777	2022-06-22	11:10:49	11:13:20	16	15		16	14	13	100	0
LVC311	1	C	3	401.421	2022-06-22	11:14:25	11:16:56	16	15		16	14	13	100	0
LVC311	1	A	1	170.301	2021-05-17	11:56:46	11:59:16		9		8	7	6	70	-7
LVC311	1	A	2	7.44741	2021-05-17	11:59:56	12:02:25		9		8	7	6	70	-7
LVC311	1	A	3	146.925	2021-05-17	12:03:39	12:06:09		9		8	7	6	70	-7
LVC311	1	B	1	191.671	2021-05-17	12:09:53	12:12:23		9		8	7	6	76	1
LVC311	1	B	2	173.681	2021-05-17	12:13:05	12:15:35		9		8	7	6	76	1
LVC311	1	B	3	142.492	2021-05-17	12:16:24	12:18:54		9		8	7	6	76	1
LVC311	1	C	1	178.496	2021-05-17	12:25:50	12:27:20		10		9	7	7	79	1
LVC311	1	C	2	256.342	2021-05-17	12:28:15	12:30:45		10		9	7	7	79	1
LVC311	1	C	3	52.0114	2021-05-17	12:31:33	12:34:03		10		9	7	7	79	1
LVC311	1	A	1	906.092	2021-07-16	11:18:42	11:21:12		20		18	16	15	51	-49
LVC311	1	A	2	1180.41	2021-07-16	11:21:53	11:24:23		20		18	16	15	51	-49
LVC311	1	A	3	574.29	2021-07-16	11:25:06	11:27:35		20		18	16	15	51	-49
LVC311	1	B	1	1402.45	2021-07-16	11:29:29	11:31:59		19		18	16	15	57	-49
LVC311	1	B	2	1644.7	2021-07-16	11:32:44	11:35:14		19		18	16	15	57	-49
LVC311	1	B	3	1950.84	2021-07-16	11:35:50	11:38:19		19		18	16	15	57	-49
LVC311	1	C	1	731.206	2021-07-16	11:40:01	11:42:31		19		18	16	15	26	-48
LVC311	1	C	2	730.068	2021-07-16	11:43:17	11:45:47		19		18	16	15	26	-48
LVC311	1	C	3	1455.64	2021-07-16	11:46:33	11:49:03		19		18	16	15	26	-48
LVC311	1	A	1	203.754	2021-08-18	11:00:45	11:03:15		14		15	14	14	29	-18
LVC311	1	A	2	734.209	2021-08-18	11:03:59	11:06:29		14		15	14	14	29	-18
LVC311	1	A	3	325.185	2021-08-18	11:07:23	11:09:53		14		15	14	14	29	-18
LVC311	1	B	1	317.22	2021-08-18	11:11:45	11:14:14		14		15	14	14	72	-6
LVC311	1	B	2	193.963	2021-08-18	11:14:55	11:17:24		14		15	14	14	72	-6
LVC311	1	B	3	258.616	2021-08-18	11:18:11	11:20:40		14		15	14	14	72	-6
LVC311	1	C	1	238.547	2021-08-18	11:22:20	11:24:50		14		15	14	14	66	-8
LVC311	1	C	2	178.445	2021-08-18	11:25:29	11:27:59		14		15	14	14	66	-8
LVC311	1	C	3	71.6742	2021-08-18	11:28:38	11:31:08		14		15	14	14	66	-8
LVC311	1	A	1	77.173	2021-09-22	12:13:59	12:16:29		8		9	9	10	60	-8
LVC311	1	A	2	400.601	2021-09-22	12:17:08	12:19:37		8		9	9	10	60	-8
LVC311	1	A	3	115.075	2021-09-22	12:20:27	12:22:56		8		9	9	10	60	-8
LVC311	1	B	1	263.415	2021-09-22	12:24:14	12:26:44		8		9	9	10	71	-12
LVC311	1	B	2	219.103	2021-09-22	12:27:21	12:29:50		8		9	9	10	71	-12
LVC311	1	B	3	238.79	2021-09-22	12:30:33	12:33:03		8		9	9	10	71	-12
LVC311	1	C	1	120.014	2021-09-22	12:33:58	12:36:28		7		8	9	9	80	0
LVC311	1	C	2	136.899	2021-09-22	12:37:04	12:39:33		7		8	9	9	80	0
LVC311	1	C	3	166.757	2021-09-22	12:40:11	12:42:41		7		8	9	9	80	0
LVC311	1	A	1	183.152	2021-04-15	12:58:25	13:00:55		2		2	2	2	75	-5
LVC311	1	A	2	292.426	2021-04-15	13:01:52	13:04:22		2		2	2	2	75	-5
LVC311	1	A	3	112.557	2021-04-15	13:05:29	13:07:59		2		2	2	2	75	-5
LVC311	1	B	1	60.7727	2021-04-15	13:10:11	13:12:41		1		1	1	1	76	0
LVC311	1	B	2	65.3832	2021-04-15	13:13:46	13:16:16		1		1	1	1	76	0
LVC311	1	B	3	60.3706	2021-04-15	13:17:21	13:19:51		1		1	1	1	76	0
LVC311	1	C	1	123.506	2021-04-15	13:22:26	13:24:56		3		3	2	2	79	-1
LVC311	1	C	2	152.213	2021-04-15	13:25:40	13:28:10		3		3	2	2	79	-1
LVC311	1	C	3	43.9409	2021-04-15	13:28:45	13:31:44		3		3	2	2	79	-1
LVC311	1	A	1	205.283	2022-07-19	11:05:32	11:08:02	17	17		16	16	15	97	0
LVC311	1	A	2	770.5	2022-07-19	11:09:03	11:11:33	17	17		16	16	15	97	0
LVC311	1	A	3	142.457	2022-07-19	11:12:30	11:15:00	17	17		16	16	15	97	0
LVC311	1	B	1	352.468	2022-07-19	11:16:20	11:18:50	18	17		16	16	16	98	0
LVC311	1	B	2	599.391	2022-07-19	11:20:01	11:22:31	18	17		16	16	16	98	0
LVC311	1	B	3	329.776	2022-07-19	11:23:33	11:26:03	18	17		16	16	16	98	0
LVC311	1	C	1	267.389	2022-07-19	11:28:40	11:31:10	18	16		15	15	15	100	0
LVC311	1	A	1	485.61	2022-08-22	10:59:00	11:01:30	18	18		18	17	16	6	0
LVC311	1	A	2	1176.27	2022-08-22	11:02:43	11:05:13	18	18		18	17	16	6	0
LVC311	1	A	3	530.691	2022-08-22	11:06:27	11:08:58	18	18		18	17	16	6	0
LVC311	1	B	1	1405.34	2022-08-22	11:10:12	11:12:43	18	19		18	18	17	94	0
LVC311	1	B	2	693.299	2022-08-22	11:14:30	11:17:00	18	19		18	18	17	94	0
LVC311	1	B	3	974.655	2022-08-22	11:18:05	11:20:35	18	19		18	18	17	94	0
LVC311	1	C	1	959.176	2022-08-22	11:22:31	11:25:01	18	18		18	18	17	9	0
LVC311	1	C	2	861.201	2022-08-22	11:27:01	11:29:31	18	18		18	18	17	9	0
LVC311	1	C	3	1455.32	2022-08-22	11:30:35	11:33:06	18	18		18	18	17	9	0
LVC311	1	A	1	131.347	2022-09-19	11:33:23	11:35:53	10	11		12	12	12	95	0
LVC311	1	A	2	419.762	2022-09-19	11:36:41	11:39:12	10	11		12	12	12	95	0
LVC311	1	A	3	201.214	2022-09-19	11:40:01	11:42:31	10	11		12	12	12	95	0
LVC311	1	B	1	222.324	2022-09-19	11:43:52	11:46:23	11	12		12	12	12	98	0
LVC311	1	B	2	208.139	2022-09-19	11:47:13	11:49:43	11	12		12	12	12	98	0
LVC311	1	B	3	159.63	2022-09-19	11:50:33	11:53:03	11	12		12	12	12	98	0
LVC311	1	C	1	215.288	2022-09-19	11:54:34	11:57:04	11	12		13	13	13	94	0
LVC311	1	C	2	321.441	2022-09-19	11:57:47	12:00:17	11	12		13	13	13	94	0
LVC311	1	C	3	240.89	2022-09-19	12:01:04	12:03:35	11	12		13	13	13	94	0
LVC311	1	A	1	130.339	2022-10-19	11:17:42	11:20:12	8	8		9	9	9	96	0
LVC311	1	A	2	203.64	2022-10-19	11:20:54	11:23:25	8	8		9	9	9	96	0
LVC311	1	A	3	85.2292	2022-10-19	11:24:04	11:26:34	8	8		9	9	9	96	0
LVC311	1	B	1	125.62	2022-10-19	11:27:51	11:30:21	7	8		9	9	9	99	0
LVC311	1	B	2	51.3292	2022-10-19	11:31:01	11:33:32	7	8		9	9	9	99	0
LVC311	1	B	3	41.9612	2022-10-19	11:34:17	11:36:47	7	8		9	9	9	99	0
LVC311	1	C	1	122.2	2022-10-19	11:38:01	11:40:31	8	9		9	10	10	90	0
LVC311	1	C	2	85.2481	2022-10-19	11:41:13	11:43:43	8	9		9	10	10	90	0
LVC311	1	C	3	49.1078	2022-10-19	11:44:24	11:46:54	8	9		9	10	10	90	0
LVC312	1	A	1	34.4782	2021-10-22	11:51:12	11:53:42		8		8	8	8	78	-7
LVC312	1	A	2	65.4928	2021-10-22	11:54:17	11:56:46		8		8	8	8	78	-7
LVC312	1	A	3	66.1736	2021-10-22	11:57:22	11:59:51		8		8	8	8	78	-7
LVC312	1	B	1	29.0847	2021-10-22	12:00:34	12:03:04		8		8	8	8	69	-8
LVC312	1	B	2	19.6202	2021-10-22	12:03:48	12:06:17		8		8	8	8	69	-8
LVC312	1	B	3	21.849	2021-10-22	12:07:00	12:09:30		8		8	8	8	69	-8
LVC312	1	C	1	32.135	2021-10-22	12:10:30	12:12:59		8		8	8	8	65	-8
LVC312	1	C	2	18.5035	2021-10-22	12:13:38	12:16:08		8		8	8	8	65	-8
LVC312	1	C	3	33.1367	2021-10-22	12:16:49	12:19:18		8		8	8	8	65	-8
LVC312	1	A	1	234.64	2022-05-24	11:53:02	11:55:32		11		7	9	8	100	-4
LVC312	1	A	2	122.231	2022-05-24	11:56:22	11:58:52		11		7	9	8	100	-4
LVC312	1	A	3	313.785	2022-05-24	11:59:49	12:02:19		11		7	9	8	100	-4
LVC312	1	B	1	139.849	2022-05-24	12:03:45	12:06:15		12		13	10	9	100	-3
LVC312	1	B	2	100.076	2022-05-24	12:07:10	12:09:40		12		13	10	9	100	-3
LVC312	1	B	3	74.1415	2022-05-24	12:10:39	12:13:09		12		13	10	9	100	-3
LVC312	1	C	1	231.406	2022-05-24	12:14:25	12:16:56		10		10	8	8	86	-11
LVC312	1	C	2	181.858	2022-05-24	12:17:44	12:20:15		10		10	8	8	86	-11
LVC312	1	C	3	72.611	2022-05-24	12:21:01	12:23:31		10		10	8	8	86	-11
LVC312	1	A	1	302.78	2022-06-20	13:32:26	13:34:56	19	16		18	15	14	98	-3
LVC312	1	A	2	257.189	2022-06-20	13:36:10	13:38:40	19	16		18	15	14	98	-3
LVC312	1	A	3	331.842	2022-06-20	13:39:42	13:42:12	19	16		18	15	14	98	-3
LVC312	1	B	1	283.355	2022-06-20	13:45:16	13:47:46	22	17		21	16	15	99	-3
LVC312	1	B	2	144.749	2022-06-20	13:48:55	13:51:26	22	17		21	16	15	99	-3
LVC312	1	B	3	212.775	2022-06-20	13:52:23	13:54:54	22	17		21	16	15	99	-3
LVC312	1	C	1	203.703	2022-06-20	13:56:24	13:58:54	18	15		18	13	12	96	-9
LVC312	1	C	2	502.109	2022-06-20	13:59:59	14:02:29	18	15		18	13	12	96	-9
LVC312	1	C	3	141.881	2022-06-20	14:03:31	14:06:01	18	15		18	13	12	96	-9
LVC312	1	A	1	87.9887	2021-05-19	13:52:00	13:54:30		10		10	9	8	77	-8
LVC312	1	A	2	59.1127	2021-05-19	13:55:11	13:57:41		10		10	9	8	77	-8
LVC312	1	A	3	106.518	2021-05-19	13:58:16	14:00:46		10		10	9	8	77	-8
LVC312	1	B	1	31.9608	2021-05-19	14:09:15	14:11:45		10		9	8	8	76	2
LVC312	1	B	2	38.019	2021-05-19	14:13:05	14:15:35		10		9	8	8	76	2
LVC312	1	B	3	96.9343	2021-05-19	14:16:24	14:18:54		10		9	8	8	76	2
LVC312	1	C	1	123.759	2021-05-19	14:22:41	14:25:11		9		9	8	7	68	-9
LVC312	1	C	2	79.6658	2021-05-19	14:26:01	14:28:31		9		9	8	7	68	-9
LVC312	1	C	3	44.1461	2021-05-19	14:29:17	14:31:47		9		9	8	7	68	-9
LVC312	1	A	1	420.113	2021-07-19	15:28:43	15:31:13		18		17	16	16	63	-71
LVC312	1	A	2	829.05	2021-07-19	15:32:51	15:35:21		18		17	16	16	63	-71
LVC312	1	A	3	1092	2021-07-19	15:36:50	15:39:20		18		17	16	16	63	-71
LVC312	1	B	1	216.658	2021-07-19	15:42:13	15:44:42		18		18	17	16	38	-49
LVC312	1	B	2	290.365	2021-07-19	15:45:56	15:48:26		18		18	17	16	38	-49
LVC312	1	B	3	363.161	2021-07-19	15:49:45	15:52:15		18		18	17	16	38	-49
LVC312	1	C	1	377.079	2021-07-19	15:55:40	15:58:10		18		18	17	16	51	-40
LVC312	1	C	2	340.928	2021-07-19	15:59:15	16:01:45		18		18	17	16	51	-40
LVC312	1	C	3	203.183	2021-07-19	16:03:04	16:06:13		18		18	17	16	51	-40
LVC312	1	A	1	181.259	2021-08-20	13:18:27	13:20:56		14		14	14	14	64	-38
LVC312	1	A	2	449.995	2021-08-20	13:21:36	13:24:06		14		14	14	14	64	-38
LVC312	1	A	3	569.261	2021-08-20	13:24:53	13:27:23		14		14	14	14	64	-38
LVC312	1	B	1	97.9421	2021-08-20	13:28:36	13:31:06		15		15	14	14	30	-31
LVC312	1	B	2	151.571	2021-08-20	13:31:48	13:34:18		15		15	14	14	30	-31
LVC312	1	B	3	217.598	2021-08-20	13:35:05	13:37:34		15		15	14	14	30	-31
LVC312	1	C	1	162.029	2021-08-20	13:38:45	13:41:14		15		15	15	15	61	-15
LVC312	1	C	2	127.249	2021-08-20	13:41:53	13:44:22		15		15	15	15	61	-15
LVC312	1	C	3	113.384	2021-08-20	13:45:01	13:47:31		15		15	15	15	61	-15
LVC312	1	A	1	103.834	2021-09-23	16:15:27	16:17:56		8		9	9	10	71	-29
LVC312	1	A	2	137.772	2021-09-23	16:18:29	16:20:59		8		9	9	10	71	-29
LVC312	1	A	3	142.299	2021-09-23	16:21:34	16:24:04		8		9	9	10	71	-29
LVC312	1	B	1	56.5061	2021-09-23	16:24:49	16:27:18		9		10	10	10	38	-27
LVC312	1	B	2	61.5888	2021-09-23	16:28:06	16:30:36		9		10	10	10	38	-27
LVC312	1	B	3	94.9205	2021-09-23	16:31:10	16:33:39		9		10	10	10	38	-27
LVC312	1	C	1	40.1374	2021-09-23	16:35:41	16:38:10		9		10	10	10	67	-20
LVC312	1	C	2	59.675	2021-09-23	16:38:44	16:41:14		9		10	10	10	67	-20
LVC312	1	C	3	54.7126	2021-09-23	16:41:47	16:44:17		9		10	10	10	67	-20
LVC312	1	A	1	43.3155	2021-04-16	12:50:29	12:52:59		3		3	2	2	77	-10
LVC312	1	A	2	59.7981	2021-04-16	12:54:14	12:56:44		3		3	2	2	77	-10
LVC312	1	A	3	97.101	2021-04-16	12:57:37	13:00:07		3		3	2	2	77	-10
LVC312	1	B	1	211.169	2021-04-16	13:05:46	13:08:16		2		3	1	1	75	-10
LVC312	1	B	2	94.9399	2021-04-16	13:09:33	13:12:03		2		3	1	1	75	-10
LVC312	1	B	3	348.42	2021-04-16	13:12:41	13:15:11		2		3	1	1	75	-10
LVC312	1	C	1	248.221	2021-04-16	13:27:55	13:30:25		1		1	1	2	67	-10
LVC312	1	C	2	431.654	2021-04-16	13:33:42	13:36:12		1		1	1	2	67	-10
LVC312	1	C	3	331.674	2021-04-16	13:37:09	13:40:44		1		1	1	2	67	-10
LVC312	1	A	1	729.796	2022-07-20	09:45:30	09:48:01	16	16		17	16	16	100	0
LVC312	1	A	2	307.836	2022-07-20	09:48:58	09:51:28	16	16		17	16	16	100	0
LVC312	1	A	3	309.75	2022-07-20	09:52:33	09:55:03	16	16		17	16	16	100	0
LVC312	1	B	1	234.836	2022-07-20	09:56:27	09:58:58	17	17		18	17	16	100	0
LVC312	1	B	2	380.164	2022-07-20	10:00:24	10:02:55	17	17		18	17	16	100	0
LVC312	1	B	3	333.283	2022-07-20	10:03:40	10:06:23	17	17		18	17	16	100	0
LVC312	1	C	1	255.981	2022-07-20	10:07:44	10:10:14	16	16		17	16	15	97	0
LVC312	1	C	2	235.289	2022-07-20	10:11:12	10:13:42	16	16		17	16	15	97	0
LVC312	1	C	3	120.313	2022-07-20	10:14:25	10:16:56	16	16		17	16	15	97	0
LVC312	1	A	1	608.542	2022-08-23	09:22:15	09:24:46	18	19		19	18	17	6	0
LVC312	1	A	2	314.371	2022-08-23	09:26:02	09:28:33	18	19		19	18	17	6	0
LVC312	1	A	3	615.476	2022-08-23	09:29:26	09:31:57	18	19		19	18	17	6	0
LVC312	1	B	1	571.175	2022-08-23	09:33:24	09:35:54	18	19		19	18	17	11	0
LVC312	1	B	2	923.339	2022-08-23	09:37:07	09:39:37	18	19		19	18	17	11	0
LVC312	1	B	3	1575.9	2022-08-23	09:40:30	09:43:00	18	19		19	18	17	11	0
LVC312	1	C	1	434.777	2022-08-23	09:44:27	09:46:58	18	19		18	19	17	96	0
LVC312	1	C	2	446.063	2022-08-23	09:47:44	09:50:14	18	19		18	19	17	96	0
LVC312	1	C	3	316.566	2022-08-23	09:51:03	09:53:57	18	19		18	19	17	96	0
LVC312	1	A	1	117.332	2022-09-22	14:31:56	14:34:26	9	12		12	12	11	97	0
LVC312	1	A	2	162.226	2022-09-22	14:35:05	14:37:35	9	12		12	12	11	97	0
LVC312	1	A	3	184.655	2022-09-22	14:38:22	14:40:53	9	12		12	12	11	97	0
LVC312	1	B	1	80.1429	2022-09-22	14:41:57	14:44:28	10	12		12	12	11	94	0
LVC312	1	B	2	74.6133	2022-09-22	14:45:06	14:47:36	10	12		12	12	11	94	0
LVC312	1	B	3	176.823	2022-09-22	14:48:13	14:50:47	10	12		12	12	11	94	0
LVC312	1	C	1	121.853	2022-09-22	14:51:45	14:54:16	9	12		12	12	11	97	0
LVC312	1	C	2	100.33	2022-09-22	14:54:52	14:57:22	9	12		12	12	11	97	0
LVC312	1	C	3	83.8985	2022-09-22	14:57:58	15:00:28	9	12		12	12	11	97	0
LVC312	1	A	1	71.4967	2022-10-20	12:37:22	12:39:52	6	6		8	9	9	99	0
LVC312	1	A	2	43.7804	2022-10-20	12:40:39	12:43:10	6	63		8	9	9	99	0
LVC312	1	A	3	90.8739	2022-10-20	12:43:45	12:46:15	6	63		8	9	9	99	0
LVC312	1	B	1	48.4403	2022-10-20	12:47:33	12:50:13	6	7		8	9	10	92	0
LVC312	1	B	2	45.9136	2022-10-20	12:50:54	12:53:25	6	7		8	9	10	92	0
LVC312	1	B	3	55.8647	2022-10-20	12:54:07	12:56:37	6	7		8	9	10	92	0
LVC312	1	C	1	72.53	2022-10-20	12:58:02	13:00:32	6	6		8	9	9	99	0
LVC312	1	C	2	55.1867	2022-10-20	13:01:06	13:03:42	6	6		8	9	9	99	0
LVC312	1	C	3	55.8239	2022-10-20	13:04:14	13:06:44	6	6		8	9	9	99	0
LVC313	1	A	1	117.179	2021-10-20	12:07:04	12:09:33		5		7	7	8	41	-44
LVC313	1	A	2	107.379	2021-10-20	12:10:12	12:12:42		5		7	7	8	41	-44
LVC313	1	A	3	106.622	2021-10-20	12:13:40	12:16:09		5		7	7	8	41	-44
LVC313	1	B	1	91.9721	2021-10-20	12:17:44	12:20:13		5		6	7	7	56	-49
LVC313	1	B	2	73.3271	2021-10-20	12:20:56	12:23:26		5		6	7	7	56	-49
LVC313	1	B	3	41.8164	2021-10-20	12:24:07	12:26:36		5		6	7	7	56	-49
LVC313	1	C	1	41.5328	2021-10-20	12:27:59	12:30:28		5		7	7	8	46	-70
LVC313	1	C	2	54.4858	2021-10-20	12:31:13	12:33:43		5		7	7	8	46	-70
LVC313	1	C	3	47.3609	2021-10-20	12:34:28	12:36:57		5		7	7	8	46	-70
LVC313	1	A	1	154.327	2022-05-27	11:06:47	11:09:17	9	9		10	7	7	86	-31
LVC313	1	A	2	144.186	2022-05-27	11:10:00	11:12:37	9	9		10	7	7	86	-31
LVC313	1	A	3	173.195	2022-05-27	11:13:21	11:15:51	9	9		10	7	7	86	-31
LVC313	1	B	1	135.536	2022-05-27	11:17:23	11:19:53	9	9		10	8	8	31	-7
LVC313	1	B	2	105.394	2022-05-27	11:20:46	11:23:16	9	9		10	8	8	31	-7
LVC313	1	B	3	60.4911	2022-05-27	11:24:09	11:26:40	9	9		10	8	8	31	-7
LVC313	1	C	1	67.3866	2022-05-27	11:27:51	11:30:22	9	8		9	8	8	35	-20
LVC313	1	C	2	166.703	2022-05-27	11:31:13	11:33:43	9	8		9	8	8	35	-20
LVC313	1	C	3	66.2356	2022-05-27	11:34:36	11:37:06	9	8		9	8	8	35	-20
LVC313	1	A	1	308.433	2022-06-28	11:38:28	11:40:59	18	16		14	12	12	32	-38
LVC313	1	A	2	340.309	2022-06-28	11:41:49	11:44:20	18	16		14	12	12	32	-38
LVC313	1	A	3	331.934	2022-06-28	11:45:22	11:47:53	18	16		14	12	12	32	-38
LVC313	1	B	1	466.465	2022-06-28	11:50:44	11:53:15	19	18		16	15	14	39	-11
LVC313	1	B	2	333.926	2022-06-28	11:54:21	11:56:52	19	18		16	15	14	39	-11
LVC313	1	B	3	282.347	2022-06-28	11:57:48	12:00:19	19	18		16	15	14	39	-11
LVC313	1	C	1	123.834	2022-06-28	12:02:43	12:05:13	17	14		13	13	11	29	-44
LVC313	1	C	2	220.892	2022-06-28	12:05:54	12:08:24	17	14		13	13	11	29	-44
LVC313	1	C	3	497.469	2022-06-28	12:09:48	12:12:19	17	14		13	13	11	29	-44
LVC313	1	A	1	257.454	2022-07-25	13:49:34	13:52:04	17	16		15	14	13	30	-37
LVC313	1	A	2	339.738	2022-07-25	13:52:41	13:55:11	17	16		15	14	13	30	-37
LVC313	1	A	3	324.217	2022-07-25	13:55:54	13:58:25	17	16		15	14	13	30	-37
LVC313	1	B	1	585.59	2022-07-25	14:00:21	14:02:52	19	17		17	16	15	35	-12
LVC313	1	B	2	338.05	2022-07-25	14:03:37	14:06:07	19	17		17	16	15	35	-12
LVC313	1	B	3	254.011	2022-07-25	14:06:55	14:09:25	19	17		17	16	15	35	-12
LVC313	1	C	1	119.609	2022-07-25	14:11:23	14:13:53	17	15		14	14	13	31	-49
LVC313	1	C	2	261.009	2022-07-25	14:14:31	14:17:01	17	15		14	14	13	31	-49
LVC313	1	C	3	448.956	2022-07-25	14:17:49	14:20:19	17	15		14	14	13	31	-49
LVC313	1	A	1	325.56	2022-08-25	11:03:10	11:05:40	18	17		16	15	14	27	-40
LVC313	1	A	2	409.441	2022-08-25	11:06:30	11:09:00	18	17		16	15	14	27	-40
LVC313	1	A	3	376.789	2022-08-25	11:10:26	11:12:57	18	17		16	15	14	27	-40
LVC313	1	B	1	1029.26	2022-08-25	11:14:31	11:17:02	19	19		18	17	16	37	-19
LVC313	1	B	2	595.371	2022-08-25	11:18:28	11:20:58	19	19		18	17	16	37	-19
LVC313	1	B	3	413.5	2022-08-25	11:21:52	11:24:23	19	19		18	17	16	37	-19
LVC313	1	C	1	140.508	2022-08-25	11:26:05	11:28:35	17	16		15	15	15	20	-66
LVC313	1	C	2	298.114	2022-08-25	11:29:23	11:31:53	17	16		15	15	15	20	-66
LVC313	1	C	3	405.366	2022-08-25	11:32:43	11:35:14	17	16		15	15	15	20	-66
LVC313	1	A	1	207.78	2022-09-21	09:29:51	09:32:21	9	11		11	11	11	38	-37
LVC313	1	A	2	201.295	2022-09-21	09:33:13	09:35:42	9	11		11	11	11	38	-37
LVC313	1	A	3	312.951	2022-09-21	09:36:22	09:38:53	9	11		11	11	11	38	-37
LVC313	1	B	1	270.196	2022-09-21	09:40:18	09:42:49	10	11		11	11	10	44	-14
LVC313	1	B	2	213.992	2022-09-21	09:43:35	09:46:05	10	11		11	11	10	44	-14
LVC313	1	B	3	178.433	2022-09-21	09:46:45	09:49:16	10	11		11	11	10	44	-14
LVC313	1	C	1	66.436	2022-09-21	09:50:38	09:53:09	10	11		11	11	10	27	-67
LVC313	1	C	2	100.977	2022-09-21	09:53:48	09:56:18	10	11		11	11	10	27	-67
LVC313	1	C	3	191.262	2022-09-21	09:57:17	09:59:47	10	11		11	11	10	27	-67
LVC313	1	A	1	93.8368	2022-10-24	12:35:58	12:38:28	6	7		7	8	8	86	-34
LVC313	1	A	2	149.974	2022-10-24	12:39:11	12:41:41	6	7		7	8	8	86	-34
LVC313	1	A	3	106.889	2022-10-24	12:42:26	12:44:56	6	7		7	8	8	86	-34
LVC313	1	B	1	91.4129	2022-10-24	12:46:36	12:49:06	6	7		7	7	8	94	-8
LVC313	1	B	2	64.1573	2022-10-24	12:50:00	12:52:30	6	7		7	7	8	94	-8
LVC313	1	B	3	42.1289	2022-10-24	12:53:08	12:55:38	6	7		7	7	8	94	-8
LVC313	1	C	1	41.856	2022-10-24	12:57:06	12:59:36	7	8		8	8	9	37	-42
LVC313	1	C	2	78.4955	2022-10-24	13:00:28	13:02:58	7	8		8	8	9	37	-42
LVC313	1	C	3	105.712	2022-10-24	13:03:47	13:06:17	7	8		8	8	9	37	-42
LVC313	1	A	1	186.992	2021-05-21	10:55:07	10:57:37		8		8	7	7	46	-33
LVC313	1	A	2	245.2	2021-05-21	10:58:07	11:00:36		8		8	7	7	46	-33
LVC313	1	A	3	145.131	2021-05-21	11:01:03	11:03:33		8		8	7	7	46	-33
LVC313	1	B	1	196.925	2021-05-21	11:06:02	11:08:32		8		8	7	7	52	-37
LVC313	1	B	2	149.345	2021-05-21	11:09:15	11:11:45		8		8	7	7	52	-37
LVC313	1	B	3	120.785	2021-05-21	11:12:22	11:14:52		8		8	7	7	52	-37
LVC313	1	C	1	40.0341	2021-05-21	11:16:38	11:19:08		8		8	7	7	33	-53
LVC313	1	C	2	64.7869	2021-05-21	11:19:46	11:22:15		8		8	7	7	33	-53
LVC313	1	C	3	66.7671	2021-05-21	11:23:13	11:25:43		8		8	7	7	33	-53
LVC313	1	A	1	292.493	2021-07-22	11:14:33	11:17:03		14		15	14	14	17	-41
LVC313	1	A	2	326.65	2021-07-22	11:18:15	11:20:45		14		15	14	14	17	-41
LVC313	1	A	3	220.667	2021-07-22	11:22:16	11:24:45		14		15	14	14	17	-41
LVC313	1	B	1	328.512	2021-07-22	11:28:03	11:30:33		14		15	15	14	36	-45
LVC313	1	B	2	115.933	2021-07-22	11:31:35	11:34:05		14		15	15	14	36	-45
LVC313	1	B	3	258.193	2021-07-22	11:35:00	11:37:30		14		15	15	14	36	-45
LVC313	1	C	1	68.6254	2021-07-22	11:40:09	11:42:39		14		14	13	13	27	-66
LVC313	1	C	2	108.698	2021-07-22	11:43:27	11:45:57		14		14	13	13	27	-66
LVC313	1	C	3	100.686	2021-07-22	11:46:52	11:49:22		14		14	13	13	27	-66
LVC313	1	A	1	248.496	2021-08-24	14:23:52	14:26:22		12		13	13	13	37	-39
LVC313	1	A	2	387.467	2021-08-24	14:27:17	14:29:46		12		13	13	13	37	-39
LVC313	1	A	3	343.751	2021-08-24	14:30:25	14:32:54		12		13	13	13	37	-39
LVC313	1	B	1	406.877	2021-08-24	14:34:46	14:37:15		12		12	12	12	40	-42
LVC313	1	B	2	157.233	2021-08-24	14:37:55	14:40:25		12		12	12	12	40	-42
LVC313	1	B	3	192.509	2021-08-24	14:41:12	14:43:42		12		12	12	12	40	-42
LVC313	1	C	1	88.6218	2021-08-24	14:45:16	14:47:46		11		12	12	11	25	-66
LVC313	1	C	2	119.738	2021-08-24	14:48:36	14:51:05		11		12	12	11	25	-66
LVC313	1	C	3	107.209	2021-08-24	14:51:45	14:54:15		11		12	12	11	25	-66
LVC313	1	A	1	183.84	2021-09-27	12:04:14	12:06:44		8		9	10	10	36	-34
LVC313	1	A	2	280.13	2021-09-27	12:07:22	12:09:51		8		9	10	10	36	-34
LVC313	1	A	3	181.995	2021-09-27	12:10:35	12:13:05		8		9	10	10	36	-34
LVC313	1	B	1	268.325	2021-09-27	12:14:20	12:16:49		8		9	9	9	50	-39
LVC313	1	B	2	181.359	2021-09-27	12:17:39	12:20:08		8		9	9	9	50	-39
LVC313	1	B	3	87.6456	2021-09-27	12:20:45	12:23:15		8		9	9	9	50	-39
LVC313	1	C	1	68.2997	2021-09-27	12:24:10	12:26:39		8		9	9	9	42	-51
LVC313	1	C	2	85.7836	2021-09-27	12:27:11	12:29:41		8		9	9	9	42	-51
LVC313	1	C	3	68.1168	2021-09-27	12:30:27	12:32:56		8		9	9	9	42	-51
LVC313	1	A	1	176.176	2021-04-22	12:03:34	12:06:04		4		4	3	3	36	-36
LVC313	1	A	2	207.983	2021-04-22	12:07:02	12:09:32		4		4	3	3	36	-36
LVC313	1	A	3	141.201	2021-04-22	12:10:47	12:13:16		4		4	3	3	36	-36
LVC313	1	B	1	114.249	2021-04-22	12:19:56	12:22:26		4		5	4	4	47	-39
LVC313	1	B	2	100.083	2021-04-22	12:23:16	12:25:46		4		5	4	4	47	-39
LVC313	1	B	3	76.0313	2021-04-22	12:26:33	12:29:03		4		5	4	4	47	-39
LVC313	1	C	1	79.4341	2021-04-22	12:36:22	12:38:52		5		5	4	4	32	-55
LVC313	1	C	2	93.3253	2021-04-22	12:39:34	12:42:04		5		5	4	4	32	-55
LVC313	1	C	3	103.51	2021-04-22	12:42:53	12:46:00		5		5	4	4	32	-55
LVC115	1	A	1	57.4813	2021-10-13	10:53:44	10:56:13		7		8	8	9	26	-140
LVC115	1	A	2	112.136	2021-10-13	10:57:00	10:59:30		7		8	8	9	26	-140
LVC115	1	A	3	89.4943	2021-10-13	11:00:28	11:02:57		7		8	8	9	26	-140
LVC115	1	B	1	74.3907	2021-10-13	11:04:06	11:06:35		6		7	8	9	51	-140
LVC115	1	B	2	52.0379	2021-10-13	11:07:22	11:09:52		6		7	8	9	51	-140
LVC115	1	B	3	84.8557	2021-10-13	11:10:50	11:13:19		6		7	8	9	51	-140
LVC115	1	C	1	107.172	2021-10-13	11:14:23	11:16:53		7		8	8	9	44	-126
LVC115	1	C	2	140.498	2021-10-13	11:17:50	11:20:20		7		8	8	9	44	-126
LVC115	1	C	3	102.258	2021-10-13	11:21:06	11:23:35		7		8	8	9	44	-126
LVC115	1	A	1	64.5255	2022-05-17	10:04:39	10:07:09	7	8		8	7	7	34	-63
LVC115	1	A	2	56.7113	2022-05-17	10:07:52	10:10:23	7	8		8	7	7	34	-63
LVC115	1	A	3	80.5992	2022-05-17	10:11:09	10:13:39	7	8		8	7	7	34	-63
LVC115	1	B	1	127.616	2022-05-17	10:15:10	10:17:41	6	7		7	6	6	85	-67
LVC115	1	B	2	69.184	2022-05-17	10:18:25	10:20:55	6	7		7	6	6	85	-67
LVC115	1	B	3	114.633	2022-05-17	10:21:51	10:24:21	6	7		7	6	6	85	-67
LVC115	1	C	1	78.0163	2022-05-17	10:25:30	10:28:00	7	8		8	7	7	70	-50
LVC115	1	C	2	86.8517	2022-05-17	10:28:53	10:31:24	7	8		8	7	7	70	-50
LVC115	1	C	3	76.6962	2022-05-17	10:32:08	10:34:39	7	8		8	7	7	70	-50
LVC115	1	A	1	147.515	2022-06-09	10:03:20	10:05:50	15	14		15	12	10	48	-66
LVC115	1	A	2	127.266	2022-06-09	10:06:51	10:09:21	15	14		15	12	10	48	-66
LVC115	1	A	3	225.979	2022-06-09	10:10:03	10:12:33	15	14		15	12	10	48	-66
LVC115	1	B	1	120.978	2022-06-09	10:13:50	10:16:20	13	13		13	11	9	77	-69
LVC115	1	B	2	169.379	2022-06-09	10:17:13	10:19:43	13	13		13	11	9	77	-69
LVC115	1	B	3	157.251	2022-06-09	10:20:37	10:23:08	13	13		13	11	9	77	-69
LVC115	1	C	1	273.909	2022-06-09	10:24:17	10:26:48	14	14		14	11	10	37	-48
LVC115	1	C	2	271.152	2022-06-09	10:27:46	10:30:17	14	14		14	11	10	37	-48
LVC115	1	C	3	304.549	2022-06-09	10:31:06	10:33:37	14	14		14	11	10	37	-48
LVC115	1	A	1	131.387	2022-07-11	10:04:20	10:06:51	14	15		15	14	14	32	-100
LVC115	1	A	2	168.189	2022-07-11	10:07:44	10:10:15	14	15		15	14	14	32	-100
LVC115	1	A	3	240.526	2022-07-11	10:12:12	10:14:42	14	15		15	14	14	32	-100
LVC115	1	B	1	210.957	2022-07-11	10:15:58	10:18:28	14	14		15	14	13	34	-111
LVC115	1	B	2	169.753	2022-07-11	10:19:43	10:22:13	14	14		15	14	13	34	-111
LVC115	1	B	3	277.8	2022-07-11	10:22:54	10:25:25	14	14		15	14	13	34	-111
LVC115	1	C	1	350.212	2022-07-11	10:26:33	10:29:04	14	14		15	14	14	33	-81
LVC115	1	C	2	485.788	2022-07-11	10:30:08	10:32:39	14	14		15	14	14	33	-81
LVC115	1	C	3	308.501	2022-07-11	10:33:32	10:36:02	14	14		15	14	14	33	-81
LVC115	1	A	1	200.639	2022-08-10	10:25:41	10:28:11	14	15		15	15	14	33	-124
LVC115	1	A	2	263.539	2022-08-10	10:28:58	10:31:28	14	15		15	15	14	33	-124
LVC115	1	A	3	270.581	2022-08-10	10:32:07	10:34:38	14	15		15	15	14	33	-124
LVC115	1	B	1	238.143	2022-08-10	10:35:49	10:38:20	14	14		15	14	14	32	-134
LVC115	1	B	2	218.738	2022-08-10	10:39:09	10:41:39	14	14		15	14	14	32	-134
LVC115	1	B	3	298.236	2022-08-10	10:42:28	10:44:58	14	14		15	14	14	32	-134
LVC115	1	C	1	348.365	2022-08-10	10:46:03	10:48:33	14	15		15	14	14	34	-100
LVC115	1	C	2	609.25	2022-08-10	10:49:22	10:51:53	14	15		15	14	14	34	-100
LVC115	1	C	3	303.756	2022-08-10	10:53:15	10:55:46	14	15		15	14	14	34	-100
LVC115	1	A	1	132.767	2022-09-12	10:21:51	10:24:21	10	11		12	12	12	11	-137
LVC115	1	A	2	148.906	2022-09-12	10:25:08	10:27:38	10	11		12	12	12	11	-137
LVC115	1	A	3	218.218	2022-09-12	10:28:18	10:30:49	10	11		12	12	12	11	-137
LVC115	1	B	1	134.557	2022-09-12	10:31:59	10:34:29	9	10		11	11	12	12	-141
LVC115	1	B	2	134.307	2022-09-12	10:35:11	10:37:41	9	10		11	11	12	12	-141
LVC115	1	B	3	242.316	2022-09-12	10:38:22	10:40:53	9	10		11	11	12	12	-141
LVC115	1	C	1	242.861	2022-09-12	10:42:02	10:44:32	9	11		11	12	12	31	-128
LVC115	1	C	2	465.979	2022-09-12	10:45:21	10:47:51	9	11		11	12	12	31	-128
LVC115	1	C	3	256.343	2022-09-12	10:48:39	10:51:10	9	11		11	12	12	31	-128
LVC115	1	A	1	71.2994	2022-10-12	10:18:50	10:21:20	7	8		9	10	10	36	-143
LVC115	1	A	2	90.8128	2022-10-12	10:22:08	10:24:38	7	8		9	10	10	36	-143
LVC115	1	A	3	111.799	2022-10-12	10:25:38	10:28:08	7	8		9	10	10	36	-143
LVC115	1	B	1	82.4345	2022-10-12	10:29:15	10:31:45	7	8		8	9	10	75	-141
LVC115	1	B	2	72.0436	2022-10-12	10:32:34	10:35:04	7	8		8	9	10	75	-141
LVC115	1	B	3	132.563	2022-10-12	10:35:45	10:38:15	7	8		8	9	10	75	-141
LVC115	1	C	1	141.611	2022-10-12	10:39:15	10:41:45	7	8		9	9	10	60	-143
LVC115	1	C	2	281.934	2022-10-12	10:42:35	10:45:05	7	8		9	9	10	60	-143
LVC115	1	C	3	108.099	2022-10-12	10:45:48	10:48:18	7	8		9	9	10	60	-143
LVC115	1	A	1	88.1373	2022-11-14	10:18:21	10:20:51	6	7		8	9	9	72	-142
LVC115	1	A	2	72.7032	2022-11-14	10:21:34	10:24:04	6	7		8	9	9	72	-142
LVC115	1	A	3	113.162	2022-11-14	10:25:20	10:27:51	6	7		8	9	9	72	-142
LVC115	1	B	1	55.3141	2022-11-14	10:30:14	10:32:44	5	6		7	8	9	88	-136
LVC115	1	B	2	47.7234	2022-11-14	10:33:22	10:35:52	5	6		7	8	9	88	-136
LVC115	1	B	3	97.6831	2022-11-14	10:36:50	10:39:20	5	6		7	8	9	88	-136
LVC115	1	C	1	143.721	2022-11-14	10:40:19	10:42:49	6	7		8	9	9	87	-119
LVC115	1	C	2	147.633	2022-11-14	10:43:51	10:46:21	6	7		8	9	9	87	-119
LVC115	1	C	3	112.045	2022-11-14	10:47:09	10:49:40	6	7		8	9	9	87	-119
LVC115	1	A	1	71.0317	2021-05-14	10:51:25	10:53:55		10		9	8	7	52	-62
LVC115	1	A	2	72.7993	2021-05-14	10:54:43	10:57:13		10		9	8	7	52	-62
LVC115	1	A	3	122.435	2021-05-14	10:58:48	11:01:18		10		9	8	7	53	-62
LVC115	1	B	1	203.681	2021-05-14	11:05:17	11:07:47		9		8	7	7	57	-64
LVC115	1	B	2	92.1145	2021-05-14	11:09:11	11:11:41		9		8	7	7	57	-64
LVC115	1	B	3	141.938	2021-05-14	11:12:36	11:15:06		9		8	7	7	57	-64
LVC115	1	C	1	160.768	2021-05-14	11:18:27	11:20:57		10		9	8	8	49	-55
LVC115	1	C	2	205.906	2021-05-14	11:22:25	11:24:55		10		9	8	8	49	-55
LVC115	1	C	3	149.078	2021-05-14	11:26:05	11:28:35		10		9	8	8	49	-55
LVC115	1	A	1	159.125	2021-07-15	11:05:32	11:08:02		19		18	17	16	11	-131
LVC115	1	A	2	188.758	2021-07-15	11:08:38	11:11:08		19		18	17	16	11	-131
LVC115	1	A	3	283.743	2021-07-15	11:11:57	11:14:27		19		18	17	16	11	-131
LVC115	1	B	1	240.622	2021-07-15	11:16:34	11:19:04		19		18	17	16	20	-135
LVC115	1	B	2	233.738	2021-07-15	11:19:47	11:22:17		19		18	17	16	20	-135
LVC115	1	B	3	217.01	2021-07-15	11:23:04	11:25:34		19		18	17	16	20	-135
LVC115	1	C	1	332.144	2021-07-15	11:27:57	11:30:27		19		18	16	16	33	-119
LVC115	1	C	2	394.161	2021-07-15	11:31:32	11:34:02		19		18	16	16	33	-119
LVC115	1	C	3	319.973	2021-07-15	11:34:40	11:37:10		19		18	16	16	33	-119
LVC115	1	A	1	126.615	2021-08-16	12:01:25	12:03:55		16		16	16	15	31	-140
LVC115	1	A	2	168.873	2021-08-16	12:04:51	12:07:21		16		16	16	15	31	-140
LVC115	1	A	3	207.965	2021-08-16	12:08:05	12:10:35		16		16	16	15	31	-140
LVC115	1	B	1	182.237	2021-08-16	12:12:08	12:14:37		15		16	15	15	22	-138
LVC115	1	B	2	165.749	2021-08-16	12:15:22	12:17:52		15		16	15	15	22	-138
LVC115	1	B	3	176.487	2021-08-16	12:18:56	12:21:26		15		16	15	15	22	-138
LVC115	1	C	1	305.928	2021-08-16	12:23:20	12:25:50		16		16	15	15	42	-142
LVC115	1	C	2	481.366	2021-08-16	12:26:32	12:29:02		16		16	15	15	42	-142
LVC115	1	C	3	319.088	2021-08-16	12:29:46	12:32:16		16		16	15	15	42	-142
LVC115	1	A	1	87.8833	2021-09-14	10:36:56	10:39:26		16		16	16	15	31	-140
LVC115	1	A	2	154.933	2021-09-14	10:40:05	10:42:35		16		16	16	15	31	-140
LVC115	1	A	3	158.555	2021-09-14	10:43:15	10:45:44		16		16	16	15	31	-140
LVC115	1	B	1	123.833	2021-09-14	10:47:29	10:49:58		15		16	15	15	22	-138
LVC115	1	B	2	95.6461	2021-09-14	10:50:42	10:53:12		15		16	15	15	22	-138
LVC115	1	B	3	164.672	2021-09-14	10:53:54	10:56:23		15		16	15	15	22	-138
LVC115	1	C	1	175.479	2021-09-14	10:58:08	11:00:37		16		16	15	15	42	-142
LVC115	1	C	2	281.298	2021-09-14	11:01:16	11:03:46		16		16	15	15	42	-142
LVC115	1	C	3	207.632	2021-09-14	11:04:24	11:06:54		16		16	15	15	42	-142
LVC115	1	A	1	45.6073	2021-04-12	11:56:01	11:58:31		4		4	3	3		-64
LVC115	1	A	2	63.2556	2021-04-12	11:59:43	12:02:13		4		4	3	3		-64
LVC115	1	A	3	71.2436	2021-04-12	12:02:59	12:05:29		4		4	3	3		-64
LVC115	1	B	1	111.072	2021-04-12	12:09:09	12:11:39		3		3	2	2		-63
LVC115	1	B	2	83.8644	2021-04-12	12:12:39	12:15:09		3		3	2	2		-63
LVC115	1	B	3	87.5753	2021-04-12	12:16:20	12:18:50		3		3	2	2		-63
LVC115	1	C	1	84.5953	2021-04-12	12:21:48	12:24:18		4		5	2	2		-54
LVC115	1	C	2	107.752	2021-04-12	12:25:05	12:27:35		4		5	2	2		-54
LVC115	1	C	3	66.9914	2021-04-12	12:28:25	12:31:54		4		5	2	2		-54
LVC116	1	A	1	113.844	2021-10-20	13:50:10	13:52:40		5		7	8	8	39	-38
LVC116	1	A	2	77.1265	2021-10-20	13:53:24	13:55:53		5		7	8	8	39	-38
LVC116	1	A	3	96.2526	2021-10-20	13:56:51	13:59:20		5		7	8	8	39	-38
LVC116	1	B	1	11.5201	2021-10-20	14:00:25	14:02:55		5		7	7	7	19	-41
LVC116	1	B	2	34.805	2021-10-20	14:04:06	14:06:36		5		7	7	7	19	-41
LVC116	1	B	3	65.2328	2021-10-20	14:07:13	14:09:42		5		7	7	7	19	-41
LVC116	1	C	1	77.0679	2021-10-20	14:10:43	14:13:13		6		7	8	8	36	-37
LVC116	1	C	2	54.9317	2021-10-20	14:14:11	14:16:40		6		7	8	8	36	-37
LVC116	1	C	3	130.9	2021-10-20	14:17:21	14:19:50		6		7	8	8	36	-37
LVC116	1	A	1	77.1518	2022-05-27	09:13:07	09:15:37	11	11		11	9	8	97	-2
LVC116	1	A	2	39.818	2022-05-27	09:16:24	09:18:54	11	11		11	9	8	97	-2
LVC116	1	A	3	122.059	2022-05-27	09:19:34	09:22:05	11	11		11	9	8	97	-2
LVC116	1	B	1	39.2092	2022-05-27	09:23:07	09:25:38	10	10		11	9	8	95	-6
LVC116	1	B	2	59.9741	2022-05-27	09:26:19	09:28:49	10	10		11	9	8	95	-6
LVC116	1	B	3	25.2257	2022-05-27	09:29:31	09:32:01	10	10		11	9	8	95	-6
LVC116	1	C	1	61.2616	2022-05-27	09:32:57	09:35:28	10	11		11	9	8	96	-2
LVC116	1	C	2	61.0788	2022-05-27	09:36:07	09:38:37	10	11		11	9	8	96	-2
LVC116	1	C	3	173.067	2022-05-27	09:39:19	09:41:49	10	11		11	9	8	96	-2
LVC116	1	A	1	210.311	2022-06-28	09:44:11	09:46:41	20	19		17	15	14	96	-7
LVC116	1	A	2	315.038	2022-06-28	09:47:38	09:50:08	20	19		17	15	14	96	-7
LVC116	1	A	3	336.064	2022-06-28	09:51:06	09:53:37	20	19		17	15	14	96	-7
LVC116	1	B	1	669.47	2022-06-28	09:55:49	09:58:20	21	20		18	16	15	88	-11
LVC116	1	B	2	412.263	2022-06-28	09:59:05	10:01:36	21	20		18	16	15	88	-11
LVC116	1	B	3	470.827	2022-06-28	10:02:44	10:05:15	21	20		18	16	15	88	-11
LVC116	1	C	1	179.514	2022-06-28	10:06:52	10:09:23	21	19		18	16	14	86	-3
LVC116	1	C	2	314.4	2022-06-28	10:10:25	10:12:56	21	19		18	16	14	86	-3
LVC116	1	C	3	163.598	2022-06-28	10:13:54	10:16:24	21	19		18	16	14	86	-3
LVC116	1	A	1	128.388	2021-05-21	12:36:35	12:39:05		8		8	6	6	48	-31
LVC116	1	A	2	123.118	2021-05-21	12:39:46	12:42:16		8		8	6	6	48	-31
LVC116	1	A	3	124.827	2021-05-21	12:42:47	12:45:17		8		8	6	6	48	-31
LVC116	1	B	1	80.946	2021-05-21	12:47:25	12:49:55		8		7	7	7	22	-40
LVC116	1	B	2	78.1057	2021-05-21	12:50:32	12:53:02		8		7	7	7	22	-40
LVC116	1	B	3	117.209	2021-05-21	12:53:36	12:56:06		8		7	7	7	22	-40
LVC116	1	C	1	124.271	2021-05-21	12:57:59	13:00:29		8		7	6	6	31	-25
LVC116	1	C	2	117.023	2021-05-21	13:01:00	13:03:30		8		7	6	6	31	-25
LVC116	1	C	3	162.424	2021-05-21	13:04:00	13:06:30		8		7	6	6	31	-25
LVC116	1	A	1	326.672	2021-07-22	13:03:57	13:06:27		14		14	14	13	20	-40
LVC116	1	A	2	276.804	2021-07-22	13:07:18	13:09:48		14		14	14	13	20	-40
LVC116	1	A	3	314.066	2021-07-22	13:11:56	13:14:26		14		14	14	13	20	-40
LVC116	1	B	1	121.489	2021-07-22	13:17:21	13:19:51		15		14	14	13	5	-47
LVC116	1	B	2	112.219	2021-07-22	13:20:47	13:23:17		15		14	14	13	5	-47
LVC116	1	B	3	188.631	2021-07-22	13:24:11	13:26:41		15		14	14	13	5	-47
LVC116	1	C	1	239.087	2021-07-22	13:29:30	13:32:00		15		15	14	13	12	-34
LVC116	1	C	2	208.541	2021-07-22	13:32:55	13:35:25		15		15	14	13	12	-34
LVC116	1	C	3	310.724	2021-07-22	13:36:30	13:38:59		15		15	14	13	12	-34
LVC116	1	A	1	252.48	2021-08-24	15:53:44	15:56:14		12		12	12	12	22	-35
LVC116	1	A	2	191.052	2021-08-24	15:56:52	15:59:22		12		12	12	12	22	-35
LVC116	1	A	3	192.729	2021-08-24	16:00:04	16:02:34		12		12	12	12	22	-35
LVC116	1	B	1	88.5529	2021-08-24	16:04:07	16:06:36		11		12	12	12	20	-42
LVC116	1	B	2	114.046	2021-08-24	16:07:39	16:10:08		11		12	12	12	20	-42
LVC116	1	B	3	184.852	2021-08-24	16:10:53	16:13:23		11		12	12	12	20	-42
LVC116	1	C	1	243.082	2021-08-24	16:15:01	16:17:31		12		12	121	12	19	-33
LVC116	1	C	2	198.645	2021-08-24	16:18:23	16:20:53		12		12	121	12	19	-33
LVC116	1	C	3	266.722	2021-08-24	16:21:40	16:24:10		12		12	121	12	19	-33
LVC116	1	A	1	144.551	2021-09-27	13:31:51	13:34:20		8		9	9	9	36	-30
LVC116	1	A	2	117.906	2021-09-27	13:34:58	13:37:27		8		9	9	9	36	-30
LVC116	1	A	3	122.904	2021-09-27	13:38:03	13:40:33		8		9	9	9	36	-30
LVC116	1	B	1	72.8433	2021-09-27	13:41:21	13:43:50		7		9	9	9	24	-37
LVC116	1	B	2	59.004	2021-09-27	13:44:13	13:46:43		7		9	9	9	24	-37
LVC116	1	B	3	99.5755	2021-09-27	13:47:24	13:49:53		7		9	9	9	24	-37
LVC116	1	C	1	139.537	2021-09-27	13:50:45	13:53:14		8		9	9	10	30	-33
LVC116	1	C	2	95.342	2021-09-27	13:53:50	13:56:20		8		9	9	10	30	-33
LVC116	1	C	3	149.593	2021-09-27	13:56:55	13:59:24		8		9	9	10	30	-33
LVC116	1	A	1	106.497	2021-04-22	10:09:05	10:11:35		5		4	4	4	24	-33
LVC116	1	A	2	141.643	2021-04-22	10:12:08	10:14:37		5		4	4	4	24	-33
LVC116	1	A	3	99.5959	2021-04-22	10:15:33	10:18:03		5		4	4	4	24	-33
LVC116	1	B	1	48.3491	2021-04-22	10:22:52	10:25:22		5		4	4	4	12	-39
LVC116	1	B	2	62.89	2021-04-22	10:25:54	10:28:23		5		4	4	4	12	-39
LVC116	1	B	3	95.6227	2021-04-22	10:29:00	10:31:30		5		4	4	4	12	-39
LVC116	1	C	1	115.667	2021-04-22	10:38:25	10:40:55		5		5	4	4	25	-30
LVC116	1	C	2	105.482	2021-04-22	10:41:46	10:44:16		5		5	4	4	25	-30
LVC116	1	C	3	227.653	2021-04-22	10:45:14	10:48:10		5		5	4	4	25	-30
LVC116	1	A	1	336.059	2022-07-25	11:57:09	11:59:39	19	18		17	16	15	96	0
LVC116	1	A	2	92.7975	2022-07-25	12:00:21	12:02:52	19	18		17	16	15	96	0
LVC116	1	A	3	115.017	2022-07-25	12:03:43	12:06:27	19	18		17	16	15	96	0
LVC116	1	B	1	273.449	2022-07-25	12:07:31	12:10:01	19	18		17	16	16	72	0
LVC116	1	B	2	272.067	2022-07-25	12:11:04	12:13:34	19	18		17	16	16	72	0
LVC116	1	B	3	258.753	2022-07-25	12:14:15	12:16:46	19	18		17	16	16	72	0
LVC116	1	C	1	103.746	2022-07-25	12:18:05	12:20:35	19	18		17	16	16	67	0
LVC116	1	C	2	217.223	2022-07-25	12:21:17	12:23:47	19	18		17	16	16	67	0
LVC116	1	C	3	94.3932	2022-07-25	12:24:32	12:27:02	19	18		17	16	16	67	0
LVC116	1	A	1	138.292	2022-09-21	11:36:32	11:39:02	9	11		11	11	10	91	0
LVC116	1	A	2	104.373	2022-09-21	11:39:38	11:42:08	9	11		11	11	10	91	0
LVC116	1	A	3	192.71	2022-09-21	11:42:43	11:45:13	9	11		11	11	10	91	0
LVC116	1	B	1	90.5079	2022-09-21	11:45:57	11:48:28	9	11		11	11	10	53	0
LVC116	1	B	2	91.6328	2022-09-21	11:49:01	11:51:31	9	11		11	11	10	53	0
LVC116	1	B	3	100.987	2022-09-21	11:52:06	11:54:37	9	11		11	11	10	53	0
LVC116	1	C	1	96.3484	2022-09-21	11:55:24	11:57:57	10	11		12	12	11	64	0
LVC116	1	C	2	122.349	2022-09-21	11:58:27	12:00:57	10	11		12	12	11	64	0
LVC116	1	C	3	167.166	2022-09-21	12:01:29	12:03:59	10	11		12	12	11	64	0
LVC116	1	A	1	66.0373	2022-10-24	10:39:39	10:42:10	5	5		6	7	7	96	0
LVC116	1	A	2	18.5501	2022-10-24	10:42:59	10:45:29	5	5		6	7	7	96	0
LVC116	1	A	3	21.5662	2022-10-24	10:46:34	10:49:04	5	5		6	7	7	96	0
LVC116	1	B	1	18.5556	2022-10-24	10:50:03	10:52:34	5	6		6	7	7	66	0
LVC116	1	B	2	53.4737	2022-10-24	10:53:20	10:55:50	5	6		6	7	7	66	0
LVC116	1	B	3	29.266	2022-10-24	10:56:40	10:59:10	5	6		6	7	7	66	0
LVC116	1	C	1	32.202	2022-10-24	10:59:58	11:02:29	6	6		7	7	7	97	0
LVC116	1	C	2	27.9085	2022-10-24	11:03:11	11:05:41	6	6		7	7	7	97	0
LVC116	1	C	3	59.0497	2022-10-24	11:06:22	11:08:52	6	6		7	7	7	97	0
LTC104	1	A	1	23.1895	2021-11-29	15:08:00	15:11:00	0	2.7			5.7	6.2	24	-79
LTC104	1	A	2	16.1241	2021-11-29	15:13:00	15:16:00	0	2.7			5.7	6.2	24	-79
LTC104	1	A	3	20.764	2021-11-29	15:19:00	15:22:00	0	2.7			5.7	6.2	24	-79
LTC104	1	B	1	27.3791	2021-11-29	15:47:00	15:50:00	0	2.6			5.6	6.3	37	-88
LTC104	1	B	2	51.4157	2021-11-29	16:05:00	16:08:00	0	2.6			5.6	6.3	37	-88
LTC104	1	B	3	40.9206	2021-11-29	16:09:00	16:12:00	0	2.6			5.6	6.3	37	-88
LTC104	1	C	1	17.5488	2021-11-29	16:14:00	16:18:00	0.3	2.8			5.4	6.4	42	-101
LTC104	1	C	2	22.3348	2021-11-29	16:19:00	16:22:00	0.3	2.8			5.4	6.4	42	-101
LTC104	1	C	3	21.0359	2021-11-29	16:23:00	16:26:00	0.3	2.8			5.4	6.4	42	-101
LTC106	1	A	2	67.2556	2021-10-06	15:18:00	15:20:00	14.8	10.9			12	12.2	53.4	-88
LTC106	1	A	3	89.2481	2021-10-06	15:21:00	15:23:00	14.8	10.9			12	12.2	53.4	-88
LTC106	1	B	1	65.0201	2021-10-06	15:24:00	15:26:00	14.3	10.9			11.9	11.9	48	-92
LTC106	1	B	2	74.8429	2021-10-06	15:27:00	15:30:00	14.3	10.9			11.9	11.9	48	-92
LTC106	1	B	3	72.0636	2021-10-06	15:31:00	15:33:00	14.3	10.9			11.9	11.9	48	-92
LTC106	1	C	1	82.438	2021-10-06	15:34:00	15:36:00	13.9	10.8			11.6	11.6	46.8	-110
LTC106	1	C	2	172.02	2021-10-06	15:41:00	15:43:00	13.9	10.8			11.6	11.6	46.8	-110
LTC106	1	C	3	57.5072	2021-10-06	15:50:00	15:52:00	13.9	10.8			11.6	11.6	46.8	-110
LTC104	1	A	1	70.8377	2022-04-26	15:36:00	15:39:00	12.5	7.9			6.5	6	24	-54.5
LTC104	1	A	2	70.8377	2022-04-26	15:44:00	15:47:00	12.5	7.9			6.5	6	24	-54.5
LTC104	1	B	1	70.8377	2022-04-26	15:22:00	15:25:00	13.8	7.7			6.4	6.1	25	-63
LTC104	1	C	1	70.8377	2022-04-26	14:59:00	15:02:00	16.2	7.4			6.5	5.8	30	-63.5
LTC104	1	A	1	89.1032	2022-06-21	12:14:00	12:17:00	14.7	13.2		12.9	11.2	10.4	42	-26.5
LTC104	1	A	2	117.473	2022-06-21	12:21:00	12:24:00	14.7	13.2		12.9	11.2	10.4	42	-26.5
LTC104	1	B	1	98.3594	2022-06-21	12:30:00	12:33:00	14.6	13.6		13.6	11.3	10.6	53	-30
LTC104	1	B	2	44.6401	2022-06-21	12:39:00	12:42:00	14.6	13.6		13.6	11.3	10.6	53	-30
LTC104	1	C	1	34.2876	2022-06-21	12:45:00	12:48:00	15.1	13.6		13.6	11.6	10.2	54	-32.6
LTC104	1	C	2	38.416	2022-06-21	12:49:00	12:52:00	15.1	13.6		13.6	11.6	10.2	54	-32.6
LTC104	1	A	1	240.396	2022-06-21	12:14:00	12:17:00	14.7	13.2		12.9	11.2	10.4	42	-26.5
LTC104	1	A	2	240.396	2022-06-21	12:21:00	12:24:00	14.7	13.2		12.9	11.2	10.4	42	0
LTC104	1	B	1	240.396	2022-06-21	12:30:00	12:33:00	14.6	13.6		13.6	11.3	10.6	53	-30
LTC104	1	B	2	240.396	2022-06-21	12:39:00	12:42:00	14.6	13.6		13.6	11.3	10.6	53	0
LTC104	1	C	1	240.396	2022-06-21	12:45:00	12:48:00	15.1	13.6		13.6	11.6	10.2	54	-32.6
LTC104	1	C	2	240.396	2022-06-21	12:49:00	12:52:00	15.1	13.6		13.6	11.6	10.2	54	0
LTC104	1	A	1	189.439	2022-06-01	13:48:00	13:51:00	14.6	11		10.2	9.5	9	18	-51
LTC104	1	A	2	189.439	2022-06-01	13:56:00	14:00:00	14.6	11		10.2	9.5	9	18	0
LTC104	1	A	3	189.439	2022-06-01	14:01:00	14:04:00	14.6	11		10.2	9.5	9	18	0
LTC104	1	B	1	189.439	2022-06-01	14:06:00	14:09:00	14.2	11		10	9.2	8.3	24	-58.5
LTC104	1	B	2	189.439	2022-06-01	14:13:00	14:16:00	14.2	11		10	9.2	8.3	24	0
LTC104	1	B	3	189.439	2022-06-01	14:17:00	14:20:00	14.2	11		10	9.2	8.3	24	0
LTC104	1	C	1	189.439	2022-06-01	14:22:00	14:26:00	14.6	11.2		10.9	9.6	9.1	25	-50
LTC104	1	C	2	189.439	2022-06-01	14:26:00	14:29:00	14.6	11.2		10.9	9.6	9.1	25	0
LTC104	1	C	3	189.439	2022-06-01	15:10:00	15:12:00	14.6	11.2		10.9	9.6	9.1	25	0
LTC104	1	A	1	189.439	2022-06-21	12:14:00	12:17:00	14.7	13.2		12.9	11.2	10.4	42	-26.5
LTC104	1	A	2	189.439	2022-06-21	12:21:00	12:24:00	14.7	13.2		12.9	11.2	10.4	42	0
LTC104	1	B	1	189.439	2022-06-21	12:30:00	12:33:00	14.6	13.6		13.6	11.3	10.6	53	-30
LTC104	1	B	2	189.439	2022-06-21	12:39:00	12:42:00	14.6	13.6		13.6	11.3	10.6	53	0
LTC104	1	C	1	189.439	2022-06-21	12:45:00	12:48:00	15.1	13.6		13.6	11.6	10.2	54	-32.6
LTC104	1	C	2	189.439	2022-06-21	12:49:00	12:52:00	15.1	13.6		13.6	11.6	10.2	54	0
LTC104	1	B	3	108.324	2022-05-17	16:08:00	16:11:00	11.8	8.8			8.8	8.6	88	0
LTC104	1	A	1	108.324	2022-05-17	17:25:00	17:28:00	9.4	8.7			8	7.6	11	-64
LTC104	1	A	2	108.324	2022-05-17	17:35:00	17:38:00	9.4	8.7			8	7.6	11	0
LTC104	1	A	3	108.324	2022-05-17	17:43:00	17:46:00	9.4	8.7			8	7.6	11	0
LTC104	1	B	1	108.324	2022-05-17	17:56:00	17:59:00	9.5	8.5			8.2	7.8	21	-76
LTC104	1	B	2	108.324	2022-05-17	18:09:00	18:09:00	9.5	8.5			8.2	7.8	21	0
LTC104	1	B	3	108.324	2022-05-17	18:17:00	18:20:00	9.5	8.5			8.2	7.8	21	0
LTC104	1	C	1	108.324	2022-05-17	18:43:00	18:46:00	8.5	8.7			8.1	7.7	20	-73
LTC104	1	A	1	108.324	2022-06-01	13:48:00	13:51:00	14.6	11		10.2	9.5	9	18	-51
LTC104	1	A	2	108.324	2022-06-01	13:56:00	14:00:00	14.6	11		10.2	9.5	9	18	0
LTC104	1	A	3	108.324	2022-06-01	14:01:00	14:04:00	14.6	11		10.2	9.5	9	18	0
LTC104	1	B	1	108.324	2022-06-01	14:06:00	14:09:00	14.2	11		10	9.2	8.3	24	-58.5
LTC104	1	B	2	108.324	2022-06-01	14:13:00	14:16:00	14.2	11		10	9.2	8.3	24	0
LTC104	1	B	3	108.324	2022-06-01	14:17:00	14:20:00	14.2	11		10	9.2	8.3	24	0
LTC104	1	C	1	108.324	2022-06-01	14:22:00	14:26:00	14.6	11.2		10.9	9.6	9.1	25	-50
LTC104	1	C	2	108.324	2022-06-01	14:26:00	14:29:00	14.6	11.2		10.9	9.6	9.1	25	0
LTC104	1	C	3	108.324	2022-06-01	15:10:00	15:12:00	14.6	11.2		10.9	9.6	9.1	25	0
LTC104	1	A	1	108.324	2022-06-21	12:14:00	12:17:00	14.7	13.2		12.9	11.2	10.4	42	-26.5
LTC104	1	A	2	108.324	2022-06-21	12:21:00	12:24:00	14.7	13.2		12.9	11.2	10.4	42	0
LTC104	1	B	1	108.324	2022-06-21	12:30:00	12:33:00	14.6	13.6		13.6	11.3	10.6	53	-30
LTC104	1	B	2	108.324	2022-06-21	12:39:00	12:42:00	14.6	13.6		13.6	11.3	10.6	53	0
LTC104	1	C	1	108.324	2022-06-21	12:45:00	12:48:00	15.1	13.6		13.6	11.6	10.2	54	-32.6
LTC104	1	C	2	108.324	2022-06-21	12:49:00	12:52:00	15.1	13.6		13.6	11.6	10.2	54	0
LTC104	1	A	2	86.3443	2022-06-01	13:56:00	14:00:00	14.6	11		10.2	9.5	9	18	-51
LTC104	1	A	3	67.7698	2022-06-01	14:01:00	14:04:00	14.6	11		10.2	9.5	9	18	-51
LTC104	1	B	1	55.7472	2022-06-01	14:06:00	14:09:00	14.2	11		10	9.2	8.3	24	-58.5
LTC104	1	B	3	90.7979	2022-06-01	14:17:00	14:20:00	14.2	11		10	9.2	8.3	24	-58.5
LTC104	1	C	1	91.2116	2022-06-01	14:22:00	14:26:00	14.6	11.2		10.9	9.6	9.1	25	-50
LTC104	1	C	2	79.8382	2022-06-01	14:26:00	14:29:00	14.6	11.2		10.9	9.6	9.1	25	-50
LTC104	1	A	1	83.7543	2022-06-21	12:14:00	12:17:00	14.7	13.2		12.9	11.2	10.4	42	-26.5
LTC104	1	A	2	83.7543	2022-06-21	12:21:00	12:24:00	14.7	13.2		12.9	11.2	10.4	42	0
LTC104	1	B	1	83.7543	2022-06-21	12:30:00	12:33:00	14.6	13.6		13.6	11.3	10.6	53	-30
LTC104	1	B	2	83.7543	2022-06-21	12:39:00	12:42:00	14.6	13.6		13.6	11.3	10.6	53	0
LTC104	1	C	1	83.7543	2022-06-21	12:45:00	12:48:00	15.1	13.6		13.6	11.6	10.2	54	-32.6
LTC104	1	C	2	83.7543	2022-06-21	12:49:00	12:52:00	15.1	13.6		13.6	11.6	10.2	54	0
LTC104	1	A	1	218.436	2022-06-21	12:14:00	12:17:00	14.7	13.2		12.9	11.2	10.4	42	-26.5
LTC104	1	A	2	218.436	2022-06-21	12:21:00	12:24:00	14.7	13.2		12.9	11.2	10.4	42	0
LTC104	1	B	1	218.436	2022-06-21	12:30:00	12:33:00	14.6	13.6		13.6	11.3	10.6	53	-30
LTC104	1	B	2	218.436	2022-06-21	12:39:00	12:42:00	14.6	13.6		13.6	11.3	10.6	53	0
LTC104	1	C	1	218.436	2022-06-21	12:45:00	12:48:00	15.1	13.6		13.6	11.6	10.2	54	-32.6
LTC104	1	C	2	218.436	2022-06-21	12:49:00	12:52:00	15.1	13.6		13.6	11.6	10.2	54	0
LTC104	1	A	1	172.699	2022-06-01	13:48:00	13:51:00	14.6	11		10.2	9.5	9	18	-51
LTC104	1	A	2	172.699	2022-06-01	13:56:00	14:00:00	14.6	11		10.2	9.5	9	18	0
LTC104	1	A	3	172.699	2022-06-01	14:01:00	14:04:00	14.6	11		10.2	9.5	9	18	0
LTC104	1	B	1	172.699	2022-06-01	14:06:00	14:09:00	14.2	11		10	9.2	8.3	24	-58.5
LTC104	1	B	2	172.699	2022-06-01	14:13:00	14:16:00	14.2	11		10	9.2	8.3	24	0
LTC104	1	B	3	172.699	2022-06-01	14:17:00	14:20:00	14.2	11		10	9.2	8.3	24	0
LTC104	1	C	1	172.699	2022-06-01	14:22:00	14:26:00	14.6	11.2		10.9	9.6	9.1	25	-50
LTC104	1	C	2	172.699	2022-06-01	14:26:00	14:29:00	14.6	11.2		10.9	9.6	9.1	25	0
LTC104	1	C	3	172.699	2022-06-01	15:10:00	15:12:00	14.6	11.2		10.9	9.6	9.1	25	0
LTC104	1	A	1	172.699	2022-06-21	12:14:00	12:17:00	14.7	13.2		12.9	11.2	10.4	42	-26.5
LTC104	1	A	2	172.699	2022-06-21	12:21:00	12:24:00	14.7	13.2		12.9	11.2	10.4	42	0
LTC104	1	B	1	172.699	2022-06-21	12:30:00	12:33:00	14.6	13.6		13.6	11.3	10.6	53	-30
LTC104	1	B	2	172.699	2022-06-21	12:39:00	12:42:00	14.6	13.6		13.6	11.3	10.6	53	0
LTC104	1	C	1	172.699	2022-06-21	12:45:00	12:48:00	15.1	13.6		13.6	11.6	10.2	54	-32.6
LTC104	1	C	2	172.699	2022-06-21	12:49:00	12:52:00	15.1	13.6		13.6	11.6	10.2	54	0
LTC104	1	A	1	185.533	2022-06-21	12:14:00	12:17:00	14.7	13.2		12.9	11.2	10.4	42	-26.5
LTC104	1	A	2	185.533	2022-06-21	12:21:00	12:24:00	14.7	13.2		12.9	11.2	10.4	42	0
LTC104	1	B	1	185.533	2022-06-21	12:30:00	12:33:00	14.6	13.6		13.6	11.3	10.6	53	-30
LTC104	1	B	2	185.533	2022-06-21	12:39:00	12:42:00	14.6	13.6		13.6	11.3	10.6	53	0
LTC104	1	C	1	185.533	2022-06-21	12:45:00	12:48:00	15.1	13.6		13.6	11.6	10.2	54	-32.6
LTC104	1	C	2	185.533	2022-06-21	12:49:00	12:52:00	15.1	13.6		13.6	11.6	10.2	54	0
LTC104	1	A	1	115.867	2021-05-24	14:55:00	14:57:00	16.2	11.2			9.4	8.8	17	-29
LTC104	1	A	2	103.78	2021-05-24	14:58:00	15:01:00	16.2	11.2			9.4	8.8	17	-29
LTC104	1	A	3	135.651	2021-05-24	15:05:00	15:07:00	16.2	11.2			9.4	8.8	17	-29
LTC104	1	B	1	136.203	2021-05-24	15:08:00	15:10:00	17.6	11			9.6	8.9	35.5	-30
LTC104	1	B	2	215.917	2021-05-24	15:16:00	15:17:00	17.6	11			9.6	8.9	35.5	-30
LTC104	1	B	3	170.542	2021-05-24	15:19:00	15:21:00	17.6	11			9.6	8.9	35.5	-30
LTC104	1	C	1	174.684	2021-05-24	15:22:00	15:24:00	16.7	11.2			9.9	9.3	69.6	-31
LTC104	1	C	2	105.493	2021-05-24	15:26:00	15:28:00	16.7	11.2			9.9	9.3	69.6	-31
LTC104	1	C	3	108.486	2021-05-24	15:34:00	15:36:00	16.7	11.2			9.9	9.3	69.6	-31
LTC104	1	A	1	137.242	2021-07-01	16:29:00	16:30:00	28	20			17.6	16	16.8	-76
LTC104	1	A	2	137.242	2021-07-01	16:42:00	16:44:00	28	20			17.6	16	16.8	-76
LTC104	1	A	3	137.242	2021-07-01	16:56:00	16:57:00	28	20			17.6	16	16.8	-76
LTC104	1	B	1	137.242	2021-07-01	17:04:00	17:06:00	28.8	19.4			15.4	14.2	19.05	-76
LTC104	1	B	2	137.242	2021-07-01	17:18:00	17:19:00	28.8	19.4			15.4	14.2	19.05	-76
LTC104	1	B	3	137.242	2021-07-01	17:29:00	17:30:00	28.8	19.4			15.4	14.2	19.05	-76
LTC104	1	C	1	137.242	2021-07-01	17:35:00	17:36:00	27	8.4			14.6	13.6	12.65	-100
LTC104	1	C	2	137.242	2021-07-01	17:37:00	17:39:00	27	8.4			14.6	13.6	12.65	-100
LTC104	1	C	3	137.242	2021-07-01	17:40:00	17:41:00	27	8.4			14.6	13.6	12.65	-100
LTC104	1	A	1	137.242	2021-07-01	16:29:00	16:30:00	28	20			17.6	16	16.8	-76
LTC104	1	A	2	160.009	2021-07-01	16:42:00	16:44:00	28	20			17.6	16	16.8	-76
LTC104	1	A	3	223.784	2021-07-01	16:56:00	16:57:00	28	20			17.6	16	16.8	-76
LTC104	1	B	1	176.44	2021-07-01	17:04:00	17:06:00	28.8	19.4			15.4	14.2	19.05	-76
LTC104	1	B	2	176.28	2021-07-01	17:18:00	17:19:00	28.8	19.4			15.4	14.2	19.05	-76
LTC104	1	B	3	216.866	2021-07-01	17:29:00	17:30:00	28.8	19.4			15.4	14.2	19.05	-76
LTC104	1	C	1	30.228	2021-07-01	17:35:00	17:36:00	27	8.4			14.6	13.6	12.65	-100
LTC104	1	C	2	30.228	2021-07-01	17:37:00	17:39:00	27	8.4			14.6	13.6	12.65	-100
LTC104	1	C	3	232.166	2021-07-01	17:40:00	17:41:00	27	8.4			14.6	13.6	12.65	-100
LTC104	1	A	1	14.5752	2021-11-29	15:08:00	15:11:00	0	2.7			5.7	6.2	24	-79
LTC104	1	A	2	14.5752	2021-11-29	15:13:00	15:16:00	0	2.7			5.7	6.2	24	-79
LTC104	1	A	3	14.5752	2021-11-29	15:19:00	15:22:00	0	2.7			5.7	6.2	24	-79
LTC104	1	B	1	14.5752	2021-11-29	15:47:00	15:50:00	0	2.6			5.6	6.3	37	-88
LTC104	1	B	2	14.5752	2021-11-29	16:05:00	16:08:00	0	2.6			5.6	6.3	37	-88
LTC104	1	B	3	14.5752	2021-11-29	16:09:00	16:12:00	0	2.6			5.6	6.3	37	-88
LTC104	1	C	1	14.5752	2021-11-29	16:14:00	16:18:00	0.3	2.8			5.4	6.4	42	-101
LTC104	1	C	2	14.5752	2021-11-29	16:19:00	16:22:00	0.3	2.8			5.4	6.4	42	-101
LTC104	1	C	3	14.5752	2021-11-29	16:23:00	16:26:00	0.3	2.8			5.4	6.4	42	-101
LTC104	1	A	1	179.242	2021-06-01	17:31:00	17:33:00	15.5	11			9.4	8.8	22	-86
LTC104	1	A	1	227.067	2021-04-30	15:52:00	15:53:00	8	7.5			5.8	5.2	34	-86
LTC104	1	B	2	227.067	2021-04-30	15:54:00	15:56:00	8	7.5			5.8	5.2	34	-107
LTC104	1	C	3	227.067	2021-04-30	16:14:00	16:16:00	8	7.5			5.8	5.2	34	-100
LTC104	1	A	1	120.962	2021-07-22	15:19:00	15:20:00	19	18			16	15.8	18.6	-86
LTC104	1	A	2	120.962	2021-07-22	15:23:00	15:25:00	19	18			16	15.8	18.6	-86
LTC104	1	A	3	120.962	2021-07-22	15:27:00	15:29:00	19	18			16	15.8	18.6	-86
LTC104	1	B	1	120.962	2021-07-22	15:32:00	15:33:00	18.8	17.7			16.4	15.9	17.6	-107
LTC104	1	B	2	120.962	2021-07-22	15:38:00	15:40:00	18.8	17.7			16.4	15.9	17.6	-107
LTC104	1	B	3	120.962	2021-07-22	15:41:00	15:42:00	18.8	17.7			16.4	15.9	17.6	-107
LTC104	1	C	1	120.962	2021-07-22	15:44:00	15:46:00	19.1	17.1			16.8	16	27.6	-100
LTC104	1	C	2	120.962	2021-07-22	15:47:00	15:49:00	19.1	17.1			16.8	16	27.6	-100
LTC104	1	C	3	120.962	2021-07-22	16:34:00	16:35:00	19.1	17.1			16.8	16	27.6	-100
LTC104	1	A	1	61.7289	2023-04-21	15:26:12	15:29:23	8.7	7.7		7.3	6.8	6.6	35	-59.5
LTC104	1	A	1	59.7735	2023-04-21	15:30:25	15:33:36	8.7	7.7		7.3	6.8	6.6	35	-59.5
LTC104	1	A	1	61.6855	2023-04-21	15:34:40	15:37:51	8.7	7.7		7.3	6.8	6.6	35	-59.5
LTC104	1	B	2	83.747	2023-04-21	15:47:56	15:51:06	8.4	7		7.3	6.8	6.6	27	-54.5
LTC104	1	B	2	46.3903	2023-04-21	15:51:55	15:55:05	8.4	7		7.3	6.8	6.6	27	-54.5
LTC104	1	B	2	61.095	2023-04-21	15:59:00	16:02:11	8.4	7		7.3	6.8	6.6	27	-54.5
LTC104	1	C	3	180.429	2023-04-21	16:08:43	16:11:53	7.7	7.7		7.3	6.8	6.6	54	-57
LTC104	1	C	3	209.113	2023-04-21	16:13:36	16:16:47	7.7	7.7		7.3	6.8	6.6	54	-57
LTC104	1	C	3	292.814	2023-04-21	16:17:51	16:21:02	7.7	7.7		7.3	6.8	6.6	54	-57
LTC104	1	A	1	64.3607	2023-05-12	14:50:03	14:53:13	19.5	9		7.9	7.4	7.2	24	-60.5
LTC104	1	A	1	67.3305	2023-05-12	14:55:22	14:58:33	19.5	9		7.9	7.4	7.2	24	0
LTC104	1	A	1	134.735	2023-05-12	14:59:23	15:02:34	19.5	9		7.9	7.4	7.2	24	0
LTC104	1	B	2	126.614	2023-05-12	15:04:03	15:07:13	19.4	9		7.8	7.5	7.3	23	-66.5
LTC104	1	B	2	68.7973	2023-05-12	15:08:19	15:11:29	19.4	9		7.8	7.5	7.3	23	0
LTC104	1	B	2	150.395	2023-05-12	15:13:44	15:16:55	19.4	9		7.8	7.5	7.3	23	0
LTC104	1	C	3	88.7538	2023-05-12	15:18:20	15:21:30	19.5	9.1		8	7.5	7.2	22	-70
[truncated: 1,644 more rows]

## Sheet: Soil temperature at 10cm depth
Date_time	LVC104	LVC105	LVC106	LVC107	LVC108	LVC109	LVC110	LVC111	LVC112	LVC115	LVC116	LVC308	LVC309	LVC311	LVC312	LVC313	EEC104	EEC105	EEC106	EEC108	EEC109	LTC104	LTC105	LTC106	LTC108	LTC109
2021-01-01	0.277	1.774	1.356	1.847	0.792	0.549	2.272	0.662	0.944	1.344	1.283	0.284	0.443	1.02071	0.463	1.02071	3.128	3.128	3.128	3.128	0.655	NA	NA	NA	NA	NA
2021-01-01 01:00:00	0.214	1.774	1.356	1.847	0.729	0.612	2.272	0.662	0.944	1.407	1.283	0.284	0.443	1.02071	0.463	1.02071	3.128	3.128	3.128	3.128	0.655	NA	NA	NA	NA	NA
2021-01-01 02:00:00	0.214	1.774	1.294	1.847	0.729	0.612	2.272	0.662	0.944	1.407	1.283	0.284	0.443	1.01629	0.463	1.01629	3.128	3.128	3.128	3.128	0.64725	NA	NA	NA	NA	NA
2021-01-01 03:00:00	0.214	1.774	1.356	1.847	0.729	0.612	2.272	0.662	0.944	1.407	1.283	0.284	0.443	1.02071	0.463	1.02071	3.128	3.128	3.128	3.128	0.655	NA	NA	NA	NA	NA
2021-01-01 04:00:00	0.214	1.774	1.294	1.847	0.729	0.612	2.272	0.662	0.944	1.407	1.283	0.284	0.443	1.01629	0.463	1.01629	3.128	3.128	3.128	3.128	0.655	NA	NA	NA	NA	NA
2021-01-01 05:00:00	0.277	1.774	1.294	1.847	0.729	0.612	2.272	0.662	0.944	1.407	1.283	0.284	0.443	1.02079	0.463	1.02079	3.128	3.128	3.128	3.128	0.655	NA	NA	NA	NA	NA
2021-01-01 06:00:00	0.214	1.774	1.356	1.847	0.729	0.612	2.272	0.662	0.944	1.344	1.283	0.284	0.443	1.01621	0.463	1.01621	3.128	3.128	3.128	3.128	0.655	NA	NA	NA	NA	NA
2021-01-01 07:00:00	0.277	1.774	1.356	1.847	0.729	0.612	2.272	0.662	0.944	1.344	1.283	0.284	0.443	1.02071	0.463	1.02071	3.128	3.128	3.128	3.128	0.662875	NA	NA	NA	NA	NA
2021-01-01 08:00:00	0.214	1.774	1.356	1.847	0.729	0.612	2.272	0.662	0.944	1.344	1.283	0.284	0.443	1.01621	0.463	1.01621	3.128	3.128	3.128	3.128	0.67075	NA	NA	NA	NA	NA
2021-01-01 09:00:00	0.277	1.774	1.356	1.847	0.729	0.612	2.272	0.662	0.944	1.344	1.283	0.284	0.443	1.02071	0.463	1.02071	3.128	3.128	3.128	3.128	0.67075	NA	NA	NA	NA	NA
2021-01-01 10:00:00	0.277	1.774	1.356	1.847	0.729	0.612	2.272	0.662	0.944	1.344	1.283	0.284	0.443	1.02071	0.463	1.02071	3.128	3.128	3.128	3.128	0.67075	NA	NA	NA	NA	NA
2021-01-01 11:00:00	0.277	1.774	1.356	1.847	0.792	0.612	2.272	0.662	0.944	1.344	1.283	0.284	0.443	1.02521	0.463	1.02521	3.128	3.128	3.128	3.128	0.67075	NA	NA	NA	NA	NA
2021-01-01 12:00:00	0.214	1.774	1.294	1.847	0.729	0.612	2.272	0.662	0.944	1.407	1.283	0.284	0.443	1.01629	0.463	1.01629	3.128	3.128	3.128	3.128	0.67075	NA	NA	NA	NA	NA
2021-01-01 13:00:00	0.277	1.774	1.356	1.847	0.792	0.549	2.272	0.662	0.944	1.344	1.283	0.284	0.443	1.02071	0.463	1.02071	3.19	3.19	3.19	3.19	0.678625	NA	NA	NA	NA	NA
2021-01-01 14:00:00	0.277	1.774	1.356	1.847	0.792	0.549	2.272	0.662	0.944	1.344	1.283	0.284	0.443	1.02071	0.463	1.02071	3.128	3.128	3.128	3.128	0.6865	NA	NA	NA	NA	NA
2021-01-01 15:00:00	0.277	1.774	1.356	1.847	0.792	0.612	2.21	0.662	0.944	1.344	1.283	0.284	0.443	1.02079	0.463	1.02079	3.128	3.128	3.128	3.128	0.6865	NA	NA	NA	NA	NA
2021-01-01 16:00:00	0.277	1.774	1.356	1.847	0.792	0.612	2.272	0.662	0.944	1.344	1.283	0.284	0.443	1.02521	0.463	1.02521	3.19	3.19	3.19	3.19	0.6865	NA	NA	NA	NA	NA
2021-01-01 17:00:00	0.277	1.774	1.356	1.847	0.792	0.612	2.272	0.662	0.944	1.344	1.283	0.284	0.443	1.02521	0.463	1.02521	3.19	3.19	3.19	3.19	0.6865	NA	NA	NA	NA	NA
2021-01-01 18:00:00	0.277	1.774	1.356	1.847	0.792	0.612	2.21	0.662	0.944	1.344	1.283	0.284	0.443	1.02079	0.463	1.02079	3.19	3.19	3.19	3.19	0.6865	NA	NA	NA	NA	NA
2021-01-01 19:00:00	0.277	1.774	1.356	1.847	0.792	0.612	2.272	0.662	0.944	1.407	1.283	0.284	0.443	1.02971	0.463	1.02971	3.19	3.19	3.19	3.19	0.6865	NA	NA	NA	NA	NA
2021-01-01 20:00:00	0.277	1.774	1.356	1.847	0.792	0.612	2.21	0.662	0.944	1.407	1.283	0.284	0.443	1.02529	0.463	1.02529	3.19	3.19	3.19	3.19	0.6865	NA	NA	NA	NA	NA
2021-01-01 21:00:00	0.277	1.774	1.356	1.847	0.792	0.612	2.21	0.662	0.944	1.407	1.283	0.284	0.443	1.02529	0.463	1.02529	3.19	3.19	3.19	3.19	0.6865	NA	NA	NA	NA	NA
2021-01-01 22:00:00	0.277	1.774	1.356	1.784	0.792	0.612	2.21	0.662	0.944	1.407	1.283	0.284	0.443	1.02079	0.463	1.02079	3.19	3.19	3.19	3.19	0.6865	NA	NA	NA	NA	NA
2021-01-01 23:00:00	0.277	1.774	1.356	1.847	0.792	0.612	2.21	0.662	0.944	1.407	1.283	0.347	0.443	1.02979	0.463	1.02979	3.19	3.19	3.19	3.19	0.6865	NA	NA	NA	NA	NA
2021-01-02	0.339	1.774	1.356	1.847	0.729	0.549	2.272	0.662	1.007	1.407	1.283	0.347	0.505	1.03857	0.463	1.03857	3.19	3.19	3.19	3.19	0.6865	NA	NA	NA	NA	NA
2021-01-02 01:00:00	0.277	1.774	1.356	1.847	0.792	0.612	2.21	0.662	0.944	1.407	1.283	0.347	0.443	1.02979	0.463	1.02979	3.19	3.19	3.19	3.19	0.6865	NA	NA	NA	NA	NA
2021-01-02 02:00:00	0.277	1.774	1.356	1.847	0.792	0.612	2.272	0.662	1.007	1.407	1.283	0.284	0.443	1.03421	0.463	1.03421	3.19	3.19	3.19	3.19	0.6865	NA	NA	NA	NA	NA
2021-01-02 03:00:00	0.277	1.774	1.356	1.847	0.792	0.612	2.272	0.662	1.007	1.407	1.283	0.347	0.443	1.03871	0.463	1.03871	3.19	3.19	3.19	3.19	0.6865	NA	NA	NA	NA	NA
2021-01-02 04:00:00	0.277	1.774	1.356	1.847	0.792	0.549	2.272	0.662	1.007	1.407	1.283	0.347	0.505	1.03864	0.463	1.03864	3.19	3.19	3.19	3.19	0.6865	NA	NA	NA	NA	NA
2021-01-02 05:00:00	0.277	1.774	1.356	1.847	0.729	0.612	2.272	0.662	1.007	1.407	1.283	0.347	0.505	1.03864	0.463	1.03864	3.19	3.19	3.19	3.19	0.694375	NA	NA	NA	NA	NA
2021-01-02 06:00:00	0.277	1.774	1.356	1.847	0.729	0.549	2.272	0.662	1.007	1.407	1.283	0.347	0.505	1.03414	0.463	1.03414	3.19	3.19	3.19	3.19	0.70225	NA	NA	NA	NA	NA
2021-01-02 07:00:00	0.277	1.774	1.356	1.847	0.729	0.549	2.272	0.662	1.007	1.407	1.283	0.347	0.505	1.03414	0.463	1.03414	3.19	3.19	3.19	3.19	0.70225	NA	NA	NA	NA	NA
2021-01-02 08:00:00	0.339	1.774	1.356	1.847	0.729	0.549	2.272	0.662	1.007	1.407	1.283	0.347	0.505	1.03857	0.463	1.03857	3.19	3.19	3.19	3.19	0.70225	NA	NA	NA	NA	NA
2021-01-02 09:00:00	0.339	1.774	1.356	1.847	0.729	0.549	2.272	0.662	1.007	1.407	1.283	0.347	0.443	1.03414	0.463	1.03414	3.19	3.19	3.19	3.19	0.70225	NA	NA	NA	NA	NA
2021-01-02 10:00:00	0.339	1.774	1.356	1.847	0.729	0.549	2.272	0.662	1.007	1.407	1.283	0.347	0.505	1.03857	0.463	1.03857	3.19	3.19	3.19	3.19	0.70225	NA	NA	NA	NA	NA
2021-01-02 11:00:00	0.339	1.774	1.356	1.847	0.729	0.549	2.272	0.662	1.007	1.407	1.283	0.347	0.505	1.03857	0.463	1.03857	3.19	3.19	3.19	3.19	0.70225	NA	NA	NA	NA	NA
2021-01-02 12:00:00	0.277	1.774	1.356	1.847	0.792	0.612	2.21	0.662	0.944	1.407	1.283	0.347	0.505	1.03421	0.463	1.03421	3.19	3.19	3.19	3.19	0.70225	NA	NA	NA	NA	NA
2021-01-02 13:00:00	0.339	1.774	1.356	1.847	0.729	0.549	2.272	0.662	1.007	1.407	1.283	0.347	0.443	1.03414	0.463	1.03414	3.19	3.19	3.19	3.19	0.710125	NA	NA	NA	NA	NA
2021-01-02 14:00:00	0.339	1.774	1.356	1.847	0.729	0.549	2.272	0.662	1.007	1.407	1.283	0.347	0.505	1.03857	0.463	1.03857	3.19	3.19	3.19	3.19	0.710125	NA	NA	NA	NA	NA
2021-01-02 15:00:00	0.339	1.774	1.356	1.847	0.729	0.549	2.272	0.662	1.007	1.407	1.283	0.347	0.443	1.03414	0.463	1.03414	3.19	3.19	3.19	3.19	0.70225	NA	NA	NA	NA	NA
2021-01-02 16:00:00	0.339	1.774	1.356	1.847	0.667	0.549	2.272	0.662	1.007	1.407	1.283	0.347	0.505	1.03414	0.463	1.03414	3.19	3.19	3.19	3.19	0.710125	NA	NA	NA	NA	NA
2021-01-02 17:00:00	0.339	1.774	1.356	1.847	0.667	0.549	2.272	0.662	1.007	1.407	1.283	0.347	0.505	1.03414	0.463	1.03414	3.19	3.19	3.19	3.19	0.718	NA	NA	NA	NA	NA
2021-01-02 18:00:00	0.339	1.774	1.356	1.847	0.667	0.549	2.272	0.662	1.007	1.344	1.283	0.347	0.505	1.02964	0.463	1.02964	3.19	3.19	3.19	3.19	0.718	NA	NA	NA	NA	NA
2021-01-02 19:00:00	0.339	1.774	1.356	1.847	0.667	0.549	2.272	0.662	1.007	1.407	1.283	0.347	0.443	1.02971	0.463	1.02971	3.19	3.19	3.19	3.19	0.710125	NA	NA	NA	NA	NA
2021-01-02 20:00:00	0.339	1.774	1.356	1.91	0.667	0.549	2.272	0.662	1.007	1.407	1.283	0.347	0.443	1.03871	0.526	1.03871	3.19	3.19	3.19	3.19	0.74125	NA	NA	NA	NA	NA
2021-01-02 21:00:00	0.339	1.774	1.356	1.91	0.667	0.549	2.272	0.662	1.007	1.407	1.283	0.347	0.443	1.03871	0.526	1.03871	3.19	3.19	3.19	3.19	0.741125	NA	NA	NA	NA	NA
2021-01-02 22:00:00	0.339	1.774	1.356	1.91	0.667	0.549	2.272	0.662	1.007	1.407	1.283	0.347	0.443	1.03421	0.463	1.03421	3.19	3.19	3.19	3.19	0.74925	NA	NA	NA	NA	NA
2021-01-02 23:00:00	0.339	1.774	1.356	1.91	0.667	0.549	2.272	0.662	1.007	1.407	1.283	0.347	0.443	1.03421	0.463	1.03421	3.19	3.19	3.19	3.19	0.91775	NA	NA	NA	NA	NA
2021-01-03	0.402	1.837	1.356	1.91	0.667	0.549	2.272	0.662	1.069	1.407	1.346	0.41	0.443	1.05664	0.463	1.05664	3.19	3.19	3.19	3.19	0.804	NA	NA	NA	NA	NA
2021-01-03 01:00:00	0.339	1.774	1.356	1.91	0.667	0.549	2.272	0.662	1.069	1.407	1.346	0.347	0.443	1.04314	0.463	1.04314	3.19	3.19	3.19	3.19	0.835375	NA	NA	NA	NA	NA
2021-01-03 02:00:00	0.339	1.774	1.356	1.91	0.667	0.549	2.272	0.662	1.069	1.407	1.346	0.347	0.443	1.04314	0.463	1.04314	3.19	3.19	3.19	3.19	0.82775	NA	NA	NA	NA	NA
2021-01-03 03:00:00	0.339	1.774	1.356	1.91	0.667	0.549	2.272	0.662	1.069	1.407	1.346	0.347	0.443	1.04314	0.463	1.04314	3.19	3.19	3.19	3.19	0.84325	NA	NA	NA	NA	NA
2021-01-03 04:00:00	0.402	1.774	1.356	1.91	0.667	0.549	2.272	0.662	1.069	1.407	1.346	0.41	0.443	1.05664	0.526	1.05664	3.19	3.19	3.19	3.19	0.8355	NA	NA	NA	NA	NA
2021-01-03 05:00:00	0.402	1.774	1.356	1.91	0.667	0.549	2.272	0.662	1.069	1.407	1.346	0.41	0.443	1.05214	0.463	1.05214	3.19	3.19	3.19	3.19	0.82775	NA	NA	NA	NA	NA
2021-01-03 06:00:00	0.402	1.774	1.356	1.91	0.667	0.549	2.272	0.662	1.069	1.407	1.346	0.41	0.443	1.05214	0.463	1.05214	3.19	3.19	3.19	3.19	0.819875	NA	NA	NA	NA	NA
2021-01-03 07:00:00	0.402	1.774	1.356	1.91	0.667	0.549	2.272	0.662	1.069	1.407	1.346	0.41	0.443	1.05664	0.526	1.05664	3.19	3.19	3.19	3.19	0.81975	NA	NA	NA	NA	NA
2021-01-03 08:00:00	0.402	1.774	1.356	1.91	0.667	0.549	2.272	0.662	1.069	1.407	1.346	0.41	0.443	1.05214	0.463	1.05214	3.19	3.19	3.19	3.19	0.804	NA	NA	NA	NA	NA
2021-01-03 09:00:00	0.402	1.774	1.356	1.91	0.667	0.549	2.272	0.662	1.069	1.407	1.346	0.41	0.443	1.05214	0.463	1.05214	3.19	3.19	3.19	3.19	0.804	NA	NA	NA	NA	NA
2021-01-03 10:00:00	0.402	1.774	1.356	1.91	0.667	0.549	2.272	0.662	1.069	1.407	1.346	0.41	0.443	1.05214	0.463	1.05214	3.19	3.19	3.19	3.19	0.79625	NA	NA	NA	NA	NA
2021-01-03 11:00:00	0.402	1.774	1.356	1.91	0.667	0.549	2.272	0.662	1.069	1.407	1.346	0.41	0.443	1.05214	0.463	1.05214	3.19	3.19	3.19	3.19	0.79625	NA	NA	NA	NA	NA
2021-01-03 12:00:00	0.339	1.774	1.356	1.91	0.667	0.549	2.272	0.662	1.007	1.407	1.283	0.347	0.443	1.03421	0.463	1.03421	3.19	3.19	3.19	3.19	0.79625	NA	NA	NA	NA	NA
2021-01-03 13:00:00	0.402	1.837	1.356	1.91	0.667	0.549	2.272	0.662	1.069	1.407	1.346	0.41	0.443	1.05664	0.463	1.05664	3.19	3.19	3.19	3.19	0.91775	NA	NA	NA	NA	NA
2021-01-03 14:00:00	0.402	1.774	1.356	1.91	0.667	0.549	2.272	0.662	1.069	1.344	1.346	0.41	0.443	1.04764	0.463	1.04764	3.19	3.19	3.19	3.19	0.91775	NA	NA	NA	NA	NA
2021-01-03 15:00:00	0.402	1.774	1.356	1.91	0.667	0.549	2.272	0.662	1.069	1.344	1.346	0.41	0.443	1.04764	0.463	1.04764	3.19	3.19	3.19	3.19	0.84125	NA	NA	NA	NA	NA
2021-01-03 16:00:00	0.402	1.774	1.356	1.847	0.667	0.549	2.272	0.662	1.069	1.407	1.346	0.41	0.443	1.04764	0.463	1.04764	3.19	3.19	3.19	3.19	0.76475	NA	NA	NA	NA	NA
2021-01-03 17:00:00	0.402	1.837	1.356	1.847	0.729	0.549	2.272	0.662	1.069	1.344	1.346	0.41	0.443	1.05207	0.463	1.05207	3.19	3.19	3.19	3.19	0.76475	NA	NA	NA	NA	NA
2021-01-03 18:00:00	0.402	1.774	1.356	1.847	0.729	0.549	2.272	0.662	1.069	1.344	1.346	0.41	0.443	1.04757	0.463	1.04757	3.19	3.19	3.19	3.19	0.756875	NA	NA	NA	NA	NA
2021-01-03 19:00:00	0.402	1.837	1.356	1.847	0.729	0.549	2.272	0.662	1.069	1.407	1.346	0.41	0.443	1.05657	0.463	1.05657	3.19	3.19	3.19	3.19	0.749	NA	NA	NA	NA	NA
2021-01-03 20:00:00	0.402	1.837	1.356	1.847	0.729	0.549	2.272	0.662	1.069	1.407	1.346	0.41	0.443	1.05657	0.463	1.05657	3.19	3.19	3.19	3.19	0.749	NA	NA	NA	NA	NA
2021-01-03 21:00:00	0.402	1.837	1.356	1.847	0.729	0.549	2.272	0.662	1.069	1.344	1.346	0.41	0.443	1.05207	0.463	1.05207	3.19	3.19	3.19	3.19	0.749	NA	NA	NA	NA	NA
2021-01-03 22:00:00	0.402	1.837	1.356	1.847	0.729	0.549	2.272	0.662	1.069	1.407	1.346	0.41	0.443	1.05657	0.463	1.05657	3.19	3.19	3.19	3.19	0.749	NA	NA	NA	NA	NA
2021-01-03 23:00:00	0.402	1.837	1.356	1.847	0.729	0.549	2.272	0.662	1.069	1.344	1.346	0.41	0.443	1.05207	0.463	1.05207	3.19	3.19	3.19	3.19	0.749	NA	NA	NA	NA	NA
2021-01-04	0.465	1.774	1.294	0.904	0.729	0.549	2.524	0.662	1.069	1.344	1.346	0.347	0.443	0.993786	0.463	0.993786	3.19	3.19	3.19	3.19	0.749	NA	NA	NA	NA	NA
2021-01-04 01:00:00	0.465	1.774	1.294	1.847	0.729	0.549	2.272	0.662	1.069	1.407	1.346	0.41	0.443	1.05214	0.463	1.05214	3.19	3.19	3.19	3.19	0.749	NA	NA	NA	NA	NA
2021-01-04 02:00:00	0.402	1.774	1.294	1.847	0.729	0.549	2.272	0.662	1.069	1.407	1.346	0.41	0.443	1.04764	0.463	1.04764	3.19	3.19	3.19	3.19	0.84125	NA	NA	NA	NA	NA
2021-01-04 03:00:00	0.465	1.774	1.294	1.847	0.729	0.549	2.272	0.662	1.069	1.407	1.346	0.41	0.443	1.05214	0.463	1.05214	3.19	3.19	3.19	3.19	0.804	NA	NA	NA	NA	NA
2021-01-04 04:00:00	0.465	1.774	1.294	1.847	0.729	0.549	2.272	0.662	1.069	1.407	1.346	0.347	0.443	1.04764	0.463	1.04764	3.19	3.19	3.19	3.19	0.8275	NA	NA	NA	NA	NA
2021-01-04 05:00:00	0.465	1.774	1.294	1.847	0.729	0.549	2.272	0.662	1.069	1.407	1.346	0.347	0.443	1.04764	0.463	1.04764	3.19	3.19	3.19	3.19	0.752125	NA	NA	NA	NA	NA
[truncated: 26,202 more rows]
