# Supplementary material for: Soil and forest floor carbon balance in drained and undrained hemiboreal peatland forests
Source: Copernicus journal article supplement (doi:10.5194/egusphere-2024-1397), 2024-05-24
Supplement: Supplementary file 1 [file egusphere-2024-1397-supplement.zip]

798      **Table S 1: Study stands characteristics.** Abbreviations: species – dominant tree species; WTL – mean water table level, cm; A – age,  
799      years; D – mean tree diameter, cm; H – mean tree height, m; BA – basal area, m<sup>2</sup> ha<sup>-1</sup>. Site types: Dr - Dryopterioso-caricosa; Ox - Oxalidosa  
800      turf. mel.; My - Myrtillosa turf.mel.

| Site identifier | Latitude | Longitude | Species | Site type | WTL  | Peat layer, cm | A  | D  | H  | BA |
|-----------------|----------|-----------|---------|-----------|------|----------------|----|----|----|----|
| Drained sites   |          |           |         |           |      |                |    |    |    |    |
| LTC106          | 54.79312 | 24.07451  | Alder   | Dr        | −56  | 50             | 30 | 12 | 13 | 26 |
| EEC108          | 58.25010 | 26.29040  |         | Dr        | −23  | 35             | 80 | 21 | 20 | 36 |
| LVC108          | 57.32216 | 26.06411  | Birch   | Ox        | −30  | 90             | 24 | 14 | 16 | 15 |
| LVC115          | 56.69388 | 25.68767  |         | Ox        | −96  | 56             | 33 | 13 | 16 | 21 |
| EEC106          | 58.43755 | 26.35558  |         | Ox        | −70  | 70             | 35 | 12 | 13 | 18 |
| LTC105          | 54.79010 | 24.08022  |         | Ox        | −94  | 50             | 43 | 22 | 18 | 23 |
| EEC109          | 58.34765 | 26.47599  |         | Ox        | −57  | 90             | 45 | 16 | 16 | 22 |
| EEC105          | 58.42870 | 26.37470  | Pine    | My        | −82  | 90             | 60 | 22 | 18 | 17 |
| LVC110          | 56.62838 | 24.11370  |         | Dr        | −76  | 35             | 81 | 12 | 12 | 43 |
| LVC107          | 56.78452 | 23.86247  |         | Ox        | −112 | 27             | 10 | 22 | 21 | 48 |
| LVC116          | 57.26889 | 25.99285  |         | My        | −31  | 165            | 14 | 14 | 14 | 34 |
| LVC313          | 57.26889 | 25.99285  |         | My        | −53  | 138            | 14 | 14 | 13 | 39 |
| LVC104          | 56.99978 | 24.65896  | Spruce  | Ox        | −80  | 50             | 40 | 22 | 20 | 33 |
| LVC105          | 56.39288 | 25.65370  |         | Ox        | −31  | 86             | 55 | 22 | 19 | 22 |
| LVC106          | 56.39495 | 25.65134  |         | Ox        | −42  | 95             | 55 | 24 | 21 | 21 |
| EEC104          | 58.43861 | 26.35394  |         | Ox        | −66  | 80             | 60 | 20 | 17 | 18 |
| LTC104          | 54.79426 | 24.08077  |         | My        | −63  | 50             | 70 | 20 | 17 | 27 |
| LVC308          | 57.34717 | 25.92568  |         | Ox        | −50  | 212            | 14 | 25 | 23 | 36 |
| LVC112          | 57.33731 | 26.02635  |         | Ox        | −31  | 68             | 16 | 10 | 10 | 21 |
| Undrained sites |          |           |         |           |      |                |    |    |    |    |
| LTC109          | 54.54109 | 23.61140  | Alder   | Dr        | −10  | 150            | 44 | 16 | 16 | 30 |
| LVC109          | 56.57378 | 24.82944  |         | Dr        | −11  | 100            | 74 | 28 | 28 | 36 |
| LTC108          | 54.54396 | 23.56578  | Birch   | Dr        | −7   | 150            | 44 | 21 | 20 | 22 |
| LVC111          | 57.29058 | 25.99874  |         | Dr        | −14  | 230            | 61 | 8  | 9  | 23 |
| LVC309          | 57.27915 | 25.85371  | Spruce  | Dr        | −17  | 133            | 81 | 21 | 20 | 34 |
| LVC311          | 57.27887 | 25.85441  |         | Dr        | −13  | 205            | 88 | 18 | 17 | 42 |
| LVC312          | 57.31164 | 25.93609  |         | Dr        | −17  | 221            | 96 | 17 | 15 | 25 |

803 **Table S 2: Meteorological conditions during the study period** (Estonian Environment Agency. Climate normals, 2024; Latvian  
 804 Environment, Geology and Meteorology Centre. Climate normals, 2024; Lithuanian Hydrometeorological Service. Climate normals, 2024)  
 805

| Parameter                  | Variable | Estonia              |                      | Latvia               |                      | Lithuania            |                      |
|----------------------------|----------|----------------------|----------------------|----------------------|----------------------|----------------------|----------------------|
|                            |          | 1 <sup>st</sup> year | 2 <sup>nd</sup> year | 1 <sup>st</sup> year | 2 <sup>nd</sup> year | 1 <sup>st</sup> year | 2 <sup>nd</sup> year |
| Annual air temperature. °C | Mean     | 6.4                  | 6.9                  | 7.0                  | 7.3                  | 7.8                  | 8.5                  |
|                            | Range    | -22.4...27.2         | -14.9...25.6         | -31.0...33.7         | -23.2...33.7         | -12.0...27.2         | -11.3...25.0         |
| Annual precipitation. mm   | Sum      | 597.0                | 472.9                | 676.3                | 685.8                | 639.8                | 533.6                |

806  
 807 **Table S 3: Laboratory standard methods used for sample analysis.**

| Parameter                                                                                   | Unit               | Method principle                                        | Standard method           |
|---------------------------------------------------------------------------------------------|--------------------|---------------------------------------------------------|---------------------------|
| Analysis of soil and biomass samples                                                        |                    |                                                         |                           |
| Bulk density                                                                                | kg m <sup>-3</sup> | Gravimetry                                              | LVS ISO 11272:2017        |
| pH                                                                                          | unit               | Potentiometry                                           | LVS ISO 10390:2021        |
| Total C                                                                                     | g kg <sup>-1</sup> | Elementary analysis (dry combustion)                    | LVS ISO 10694:2006        |
| Total N                                                                                     | g kg <sup>-1</sup> | Elementary analysis (dry combustion)                    | LVS ISO 13878:1998        |
| Ash content                                                                                 | g kg <sup>-1</sup> | Gravimetry                                              | LVS EN ISO 10693:2014     |
| HNO <sub>3</sub> extractable potassium (K), calcium (Ca), magnesium (Mg) and phosphorus (P) | g kg <sup>-1</sup> | ICP-OES                                                 | LVS EN ISO 11885:2009     |
| Analysis of water samples                                                                   |                    |                                                         |                           |
| pH                                                                                          | unit               | Potentiometry                                           | LVS EN ISO 10523:2012     |
| DOC                                                                                         | mg L <sup>-1</sup> | Catalytical combustion with infrared detection          | LVS EN 1484:2000          |
| Total N                                                                                     | mg L <sup>-1</sup> | Catalytical combustion with chemiluminescence detection | LVS EN 1484:2000          |
| NO <sub>3</sub> <sup>-</sup> , PO <sub>4</sub> <sup>3-</sup>                                | mg L <sup>-1</sup> | Ion chromatography                                      | LVS EN ISO 10304 – 1:2009 |
| NH <sub>4</sub> <sup>+</sup>                                                                | mg L <sup>-1</sup> | Photometry                                              | LVS ISO 7150-1:1984       |
| K, Ca, Mg                                                                                   | mg L <sup>-1</sup> | Flame atomic absorption spectrometry                    | LVS EN ISO 7980:2000      |

808  
 809

810 **Table S 4: Summary of soil characteristics in the study sites (mean±SD).** BD - bulk density, Corg – organic carbon, N – Nitrogen, CN –  
811 C:N ratio, P – phosphorous, K – potassium, Ca – calcium, Mg – magnesium.

| Parameter | Unit               | Drained |         |         | Undrained |         |         |
|-----------|--------------------|---------|---------|---------|-----------|---------|---------|
|           |                    | 0-10    | 0-20    | 0-30    | 0-10      | 0-20    | 0-30    |
| BD        | kg m <sup>-3</sup> | 221±86  | 270±135 | 314±214 | 173±38    | 174±32  | 168±32  |
| pH        | units              | 3.9±1.1 | 4.1±1.1 | 4.2±1.1 | 5.3±0.3   | 5.3±0.3 | 5.3±0.3 |
| Corg      | g kg <sup>-1</sup> | 412±91  | 416±121 | 406±153 | 411±64    | 432±39  | 443±39  |
| N         | g kg <sup>-1</sup> | 23±6    | 22±8    | 20±9    | 27±4      | 27±4    | 27±4    |
| C:N       | ratio              | 19±6    | 21±6    | 22±7    | 15±3      | 16±3    | 17±3    |
| P         | g kg <sup>-1</sup> | 0.9±0.4 | 0.8±0.5 | 0.8±0.6 | 2±1.7     | 1.8±1.2 | 1.6±1.1 |
| K         | g kg <sup>-1</sup> | 0.7±0.4 | 0.5±0.3 | 0.4±0.3 | 1.6±1.1   | 1.3±0.8 | 1.1±0.6 |
| Ca        | g kg <sup>-1</sup> | 15±13   | 17±14   | 17±14   | 28±7      | 28±7    | 28±8    |
| Mg        | g kg <sup>-1</sup> | 1.2±0.7 | 1.2±0.8 | 1.2±0.8 | 2.6±0.8   | 2.5±0.8 | 2.4±0.7 |

812

813 **Table S 5: Summary of water table level characteristics in the study sites (mean±SD).**

| Parameter                     | Unit               | Drained   |           |           | Undrained  |         |
|-------------------------------|--------------------|-----------|-----------|-----------|------------|---------|
|                               |                    | EE        | LT        | LV        | LT         | LV      |
| pH                            | unit               | 6.9±0.6   | 6.5±0.6   | 6.1±1.2   | 7±0.5      | 7±0.5   |
| DOC                           | mg L <sup>-1</sup> | 69.4±23.1 | 93.5±64.5 | 95.4±57.4 | 103.3±23.7 | 41.7±30 |
| N                             | mg L <sup>-1</sup> | 13.2±11.5 | 12.7±15.4 | 5.4±4.7   | 5.5±1.7    | 2.1±1.4 |
| NH <sub>4</sub> <sup>+</sup>  | mg L <sup>-1</sup> | 0.6±0.9   | 0.5±0.7   | 0.4±0.4   | 0.7±0.9    | 0.6±0.7 |
| NO <sub>3</sub> <sup>-</sup>  | mg L <sup>-1</sup> | 11.5±12.9 | 10.7±17.4 | 2.5±4.3   | 1.3±1.6    | 0.5±0.5 |
| PO <sub>4</sub> <sup>3-</sup> | mg L <sup>-1</sup> | 0.1±0.1   | 0.1±0.2   | 0.1±0.2   | 0.1±0.1    | 0.1±0.1 |
| K                             | mg L <sup>-1</sup> | 0.4±0.3   | 2.8±3.5   | 0.6±0.4   | 1.9±0.7    | 0.6±0.3 |
| Ca                            | mg L <sup>-1</sup> | 63.6±27.8 | 77.7±51   | 27.5±16.9 | 71.1±15.5  | 29±9.2  |
| Mg                            | mg L <sup>-1</sup> | 7.5±4.9   | 14.6±8.2  | 5.6±4.6   | 12.9±2.2   | 6±1.4   |

814

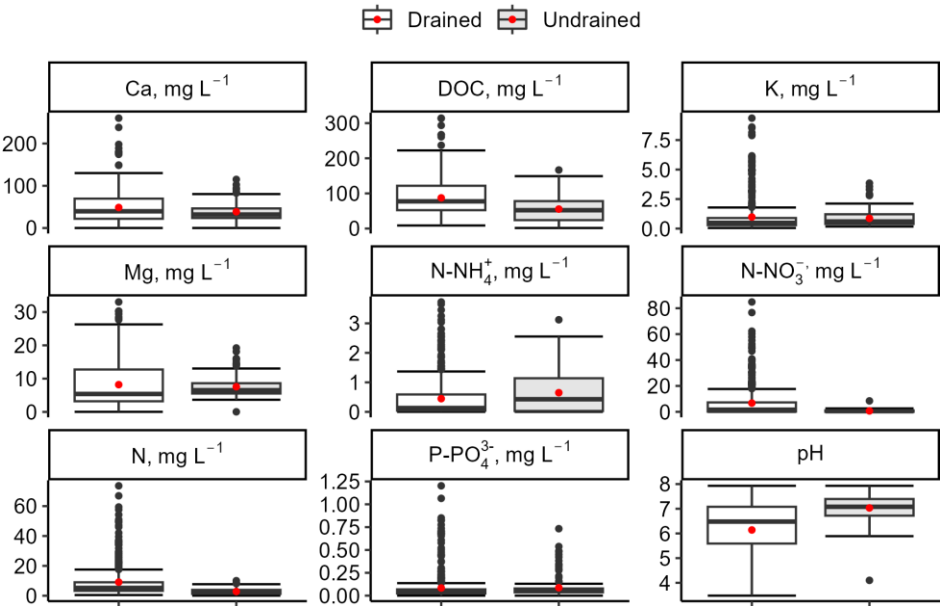

815

816

817 **Figure S 1: Variation of groundwater chemical properties.**

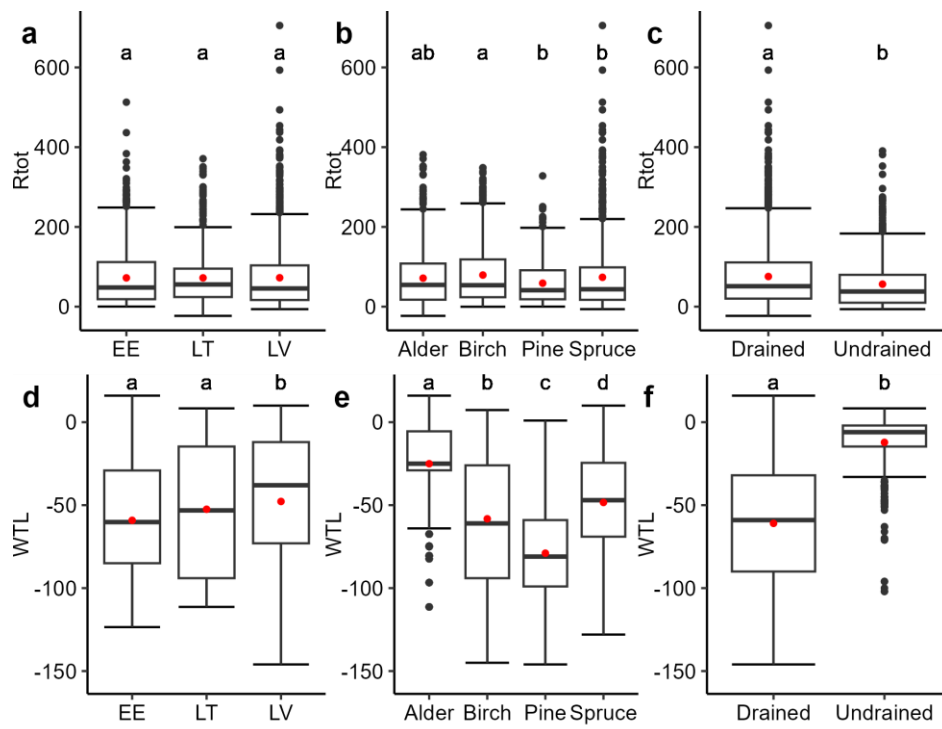

**Figure S 2: Summary of water table level (WTL, cm) depth and total respiration ( $R_{tot}$ ,  $\text{mg CO}_2 \text{ C m}^{-2} \text{ h}^{-1}$ ) measurement results.**

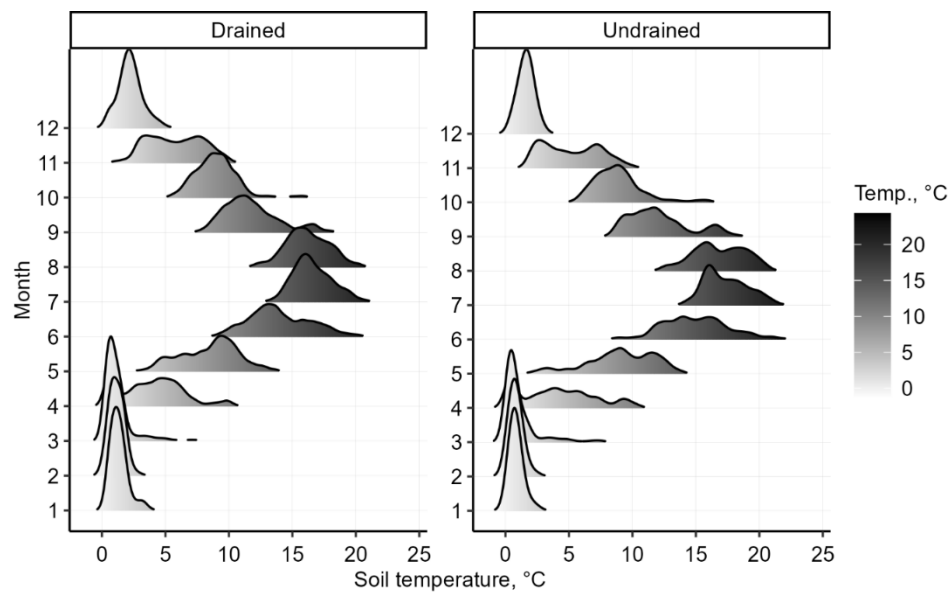

**Figure S 3: Density plots of soil temperature measurement results at 10 cm depth.**

824 **Table S 6: Characteristics of total soil respiration (R<sub>tot</sub>) prediction models used for interpolation of hourly emissions.** Abbreviations:  
825 R10 - R<sub>tot</sub> when soil temperature is 10 °C at 10 cm depth, RMSE – root mean square error of the model prediction. RMSE improvement  
826 and R10 increase are relative differences of corresponding model characteristics compared to linear models fitted using log10 transformed  
827 data. Model describes:  $\frac{R_{tot}^{\lambda-1}}{\lambda} = a * T + b$ . where:  
828 R<sub>tot</sub> – soil instantaneous total respiration (mg CO<sub>2</sub>-C m<sup>-2</sup> h<sup>-1</sup>), lambda – lambda value used for R<sub>tot</sub> data transformation, a – coefficient a of  
829 linear model, b – coefficient b of a linear model, T – soil temperature at 10 cm depth (°C).

830

| Site identifier | Coefficient a | Coefficient b | R <sup>2</sup> | R10 | RMSE | RMSE improvement | R10 increase |
|-----------------|---------------|---------------|----------------|-----|------|------------------|--------------|
| LVC104          | 0.4903        | 5.6964        | 0.71           | 89  | 35   | 7%               | 10%          |
| LVC105          | 0.74315       | 4.44323       | 0.84           | 116 | 59   | 8%               | 19%          |
| LVC106          | 0.7318        | 5.0111        | 0.85           | 127 | 59   | 14%              | 20%          |
| LVC107          | 0.53295       | 4.32402       | 0.70           | 72  | 36   | 6%               | 10%          |
| LVC108          | 0.70835       | 3.45753       | 0.78           | 88  | 45   | 20%              | 26%          |
| LVC109          | 0.68144       | 3.27991       | 0.80           | 80  | 43   | 34%              | 24%          |
| LVC110          | 0.60544       | 3.41507       | 0.72           | 69  | 31   | 11%              | 15%          |
| LVC111          | 0.70313       | 2.31005       | 0.78           | 67  | 31   | 7%               | 28%          |
| LVC112          | 0.6929        | 3.341         | 0.84           | 83  | 24   | 43%              | 12%          |
| LVC115          | 0.61712       | 4.19065       | 0.75           | 85  | 38   | 25%              | 17%          |
| LVC116          | 0.6038        | 3.5911        | 0.77           | 72  | 21   | 31%              | 12%          |
| LVC308          | 0.65977       | 3.86443       | 0.82           | 87  | 23   | 38%              | 14%          |
| LVC309          | 0.5781        | 2.4058        | 0.74           | 50  | 24   | 40%              | 30%          |
| LVC311          | 0.5456        | 3.1613        | 0.63           | 56  | 31   | 6%               | 29%          |
| LVC312          | 0.6539        | 2.1481        | 0.73           | 57  | 33   | -11%             | 35%          |
| LVC313          | 0.52151       | 4.277         | 0.80           | 69  | 17   | 25%              | 6%           |
| EEC108          | 0.59162       | 3.17106       | 0.82           | 63  | 25   | 27%              | 19%          |
| EEC106          | 0.5715        | 4.2928        | 0.82           | 78  | 37   | 32%              | 20%          |
| EEC105          | 0.44359       | 4.60199       | 0.75           | 62  | 32   | 20%              | 15%          |
| EEC104          | 0.55427       | 4.47956       | 0.72           | 78  | 53   | 14%              | 20%          |
| EEC109          | 0.499         | 5.732         | 0.63           | 92  | 52   | 6%               | 26%          |
| LTC104          | 0.35744       | 4.25538       | 0.46           | 46  | 38   | 5%               | 17%          |
| LTC105          | 0.4589        | 5.07975       | 0.52           | 72  | 54   | 6%               | 15%          |
| LTC106          | 0.5431        | 4.8996        | 0.54           | 84  | 68   | 7%               | 22%          |
| LTC108          | 0.28306       | 4.04885       | 0.39           | 35  | 26   | 3%               | 28%          |
| LTC109          | 0.36444       | 4.24811       | 0.43           | 46  | 44   | -4%              | 36%          |

831

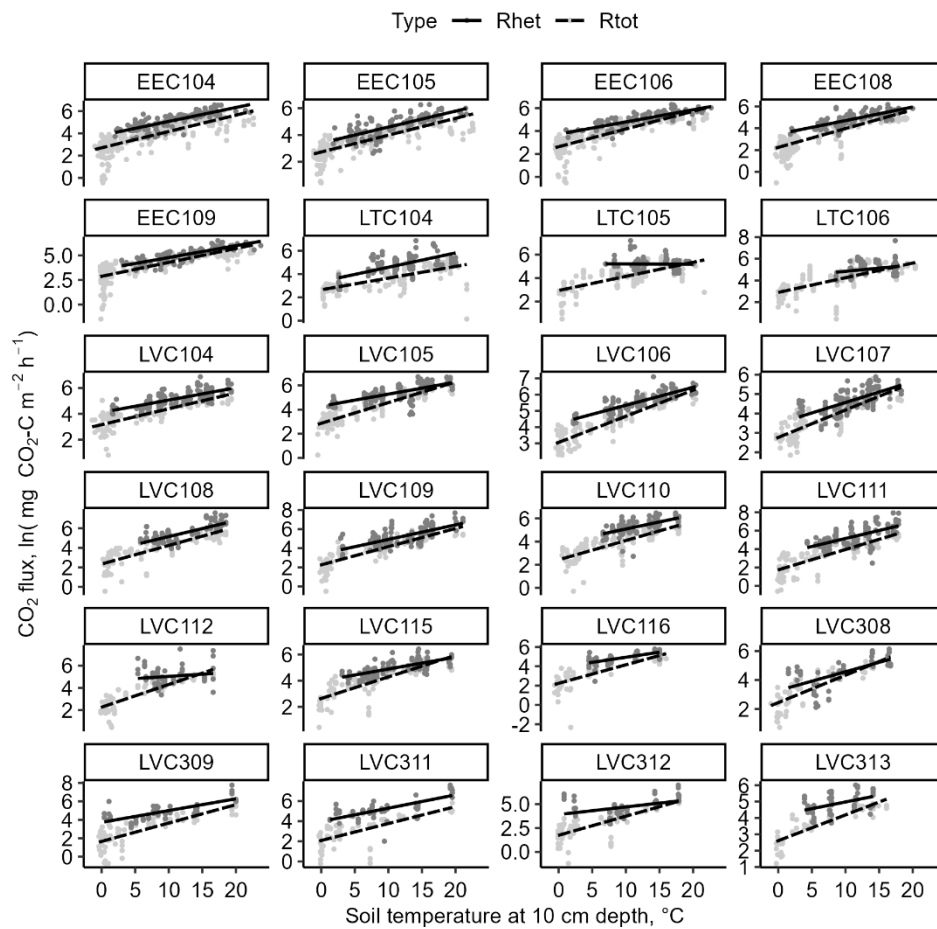

**Figure S 4: Relationship between soil temperature, soil heterotrophic (Rhet) and total (Rtot) respiration.**

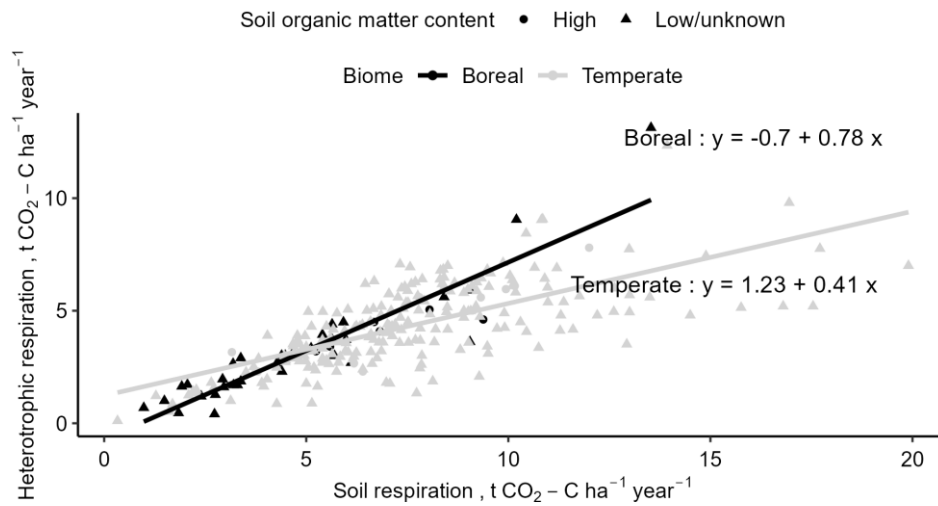

**Figure S 5: Relationship between total soil respiration and soil heterotrophic respiration in forests according to previous studies (Jian, J. et al., 2021).**

839

840

Table S 7: Biomass (t dm. ha<sup>-1</sup>) measurement results (mean±SD) stratified by drainage status and country. NE – not estimated.  
 \*Data used for soil C balance estimation.

| Category | Drained   |           |           | Undrained  |           |
|----------|-----------|-----------|-----------|------------|-----------|
|          | EE        | LT        | LV        | LT         | LV        |
| aGV*     | 0.79±0.33 | 1.34±2.98 | 2.38±0.63 | 4.64±14.53 | 1.44±0.63 |
| bGV*     | NE        | 4.24±2.01 | 2.52±0.96 | 2.3±7.74   | 2.47±1.26 |
| S        | 0.36±0.36 | 2.04±2.42 | NE        | 4.27±24.24 | NE        |
| FR       | NE        | NE        | NE        | NE         | NE        |
| FRP*     | NE        | 2.51±5.35 | 2.54±1.02 | NE         | 1.08±0.76 |
| M        | 4.8±2.49  | NE        | NE        | NE         | NE        |
| MP       | 0.92±0.48 | NE        | 0.87±0.32 | NE         | 1.01±0.31 |
| fLF*     | 3.66±0.64 | 3.7±1.2   | 2.9±0.69  | 3.28±13.77 | 2.23±1.23 |
| cLF      | 1.39±0.65 | 0.33±0.62 | 0.54±0.26 | 1.35±6.61  | 0.55±0.68 |

841

**Table S 8: Mean estimated annual cumulative total respiration (t C ha<sup>-1</sup> year<sup>-1</sup>) and biomass (t dm. ha<sup>-1</sup>) in the study sites.** Abbreviations: aGV and bGV – aboveground and belowground biomass of herbaceous ground vegetation, respectively; NE – not estimated, NA – biomass not present or in negligible amounts. \*Used as soil C input values for soil C balance estimation.

| Study site | Rtot  | Rhet  | aGV* | bGV* | Shrubs | Fine root production* | Moss | Moss production | Fine litterfall* | Coarse litterfall |
|------------|-------|-------|------|------|--------|-----------------------|------|-----------------|------------------|-------------------|
| EEC104     | 6.04  | 7.62  | 0.93 | NE   | 0.08   | NE                    | 7.20 | 1.24            | 3.80             | 1.30              |
| EEC105     | 4.76  | 9.48  | 1.10 | NE   | 0.07   | NE                    | 5.63 | 1.08            | 3.31             | 1.72              |
| EEC106     | 6.07  | 7.95  | 0.38 | NE   | 0.43   | NE                    | 3.61 | 1.11            | 3.63             | 1.51              |
| EEC108     | 5.08  | 12.77 | 0.83 | NE   | 0.73   | NE                    | NE   | 0.92            | 4.44             | 1.88              |
| EEC109     | 7.61  | 10.36 | 0.70 | NE   | 0.51   | NE                    | 2.75 | 0.26            | 3.12             | 0.53              |
| LTC104     | 3.92  | -     | NA   | 5.11 | 2.72   | 5.00                  | 5.93 | 2.08            | 3.77             | 0.62              |
| LTC105     | 6.45  | -     | 2.19 | 4.10 | NA     | 1.29                  | NA   | NA              | 3.19             | 0.13              |
| LTC106     | 7.59  | -     | 0.50 | 3.52 | 1.35   | 1.25                  | NA   | NA              | 4.15             | 0.25              |
| LTC108     | 2.98  | -     | 3.49 | 1.69 | 2.37   | NE                    | 0.96 | NE              | 4.37             | 1.87              |
| LTC109     | 4.04  | -     | 5.78 | 2.91 | 6.18   | NE                    | NA   | NA              | 2.20             | 0.83              |
| LVC104     | 6.59  | 12.45 | 2.60 | 0.72 | NE     | 2.10                  | NE   | 0.35            | 4.09             | 0.03              |
| LVC105     | 9.01  | 15.78 | 2.47 | 1.43 | NE     | 1.40                  | NE   | 0.74            | 4.03             | 0.45              |
| LVC106     | 10.50 | 18.03 | 3.23 | 1.83 | NE     | 2.96                  | NE   | 1.68            | 2.76             | 0.44              |
| LVC107     | 5.36  | 7.57  | 1.49 | 3.02 | NE     | 5.57                  | NE   | NA              | 3.98             | 1.08              |
| LVC108     | 7.25  | 17.25 | 1.82 | 2.19 | NE     | 0.94                  | NE   | 1.20            | 2.67             | 0.35              |
| LVC109     | 6.89  | 13.72 | 1.12 | 1.36 | NE     | 0.64                  | NE   | NA              | 3.33             | 1.52              |
| LVC110     | 5.43  | 13.92 | 1.12 | 2.43 | NE     | 2.89                  | NE   | 0.32            | 4.00             | 1.33              |
| LVC111     | 5.51  | 17.42 | 0.82 | 2.38 | NE     | 1.51                  | NE   | 1.18            | 3.11             | 0.47              |
| LVC112     | 6.60  | 12.50 | 1.67 | 3.11 | NE     | NE                    | NE   | NA              | 1.52             | 0.27              |
| LVC115     | 6.61  | 10.76 | 1.44 | 2.48 | NE     | 1.92                  | NE   | NA              | 2.57             | 0.86              |
| LVC116     | 5.65  | 11.66 | 3.22 | 6.12 | NE     | NE                    | NE   | 1.06            | 1.42             | 0.34              |
| LVC308     | 6.27  | 7.72  | 3.15 | 1.36 | NE     | NE                    | NE   | 0.75            | 1.85             | 0.33              |
| LVC309     | 3.98  | 12.90 | 1.61 | 3.29 | NE     | NE                    | NE   | NA              | 2.09             | 0.33              |
| LVC311     | 4.57  | 18.30 | 1.51 | 3.69 | NE     | NE                    | NE   | NA              | 1.68             | 0.24              |
| LVC312     | 5.27  | 9.49  | 2.14 | 1.62 | NE     | NE                    | NE   | 0.83            | 0.94             | 0.21              |
| LVC313     | 4.96  | 11.11 | 3.98 | 3.08 | NE     | NE                    | NE   | NA              | 2.96             | 0.45              |



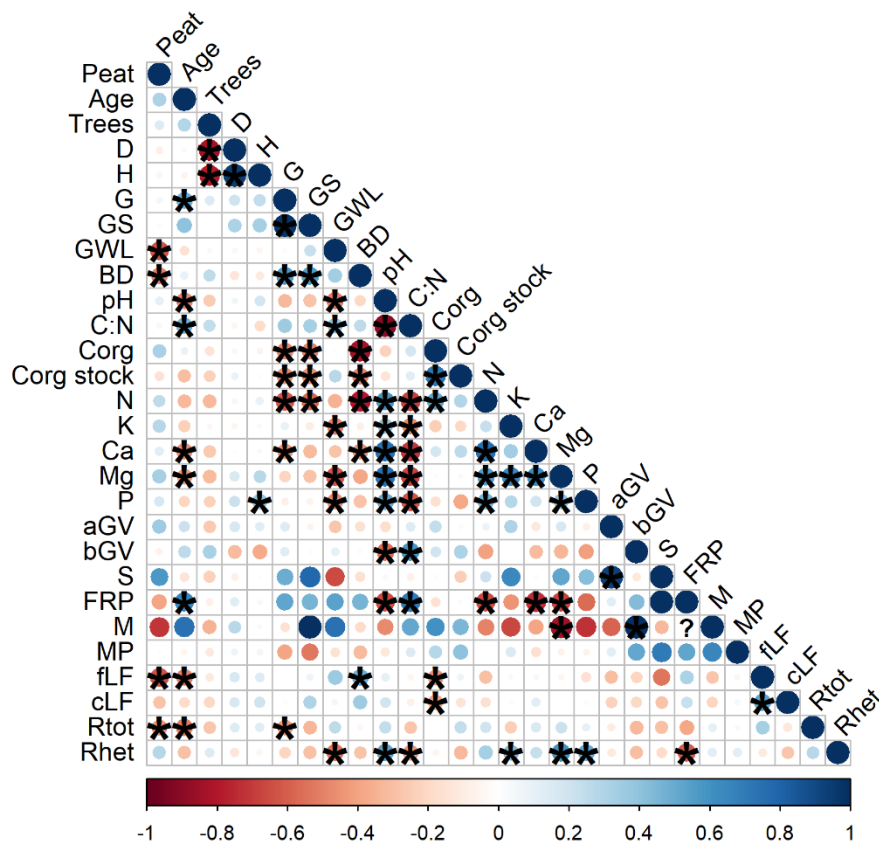

**Figure S 6: Correlation matrix of annual data (soil parameters at 0-30 cm depth).** Abbreviations: Peat – peat layer width; Age – stand age; Trees – tree density; D – mean tree diameter; H – mean tree height; G – basal area; GS – growing stock; GWL – water table level; BD – bulk density; pH – soil pH value; C:N – ratio between organic carbon and nitrogen in soil; Corg stock – soil organic carbon stock; K, Ca, Mg, P, and Corg represent the content of potassium, calcium, magnesium, phosphorus, and organic carbon in the soil, respectively; aGV, bGV, S, FRP, M, MP, fLF, cLF – biomass of aboveground herbaceous vegetation, belowground herbaceous vegetation, shrubs, tree fine root production, moss, moss production, fine foliar litterfall, coarse woody litterfall, respectively; Rtot – annual total forest floor respiration ; Rhet – annual soil heterotrophic respiration.



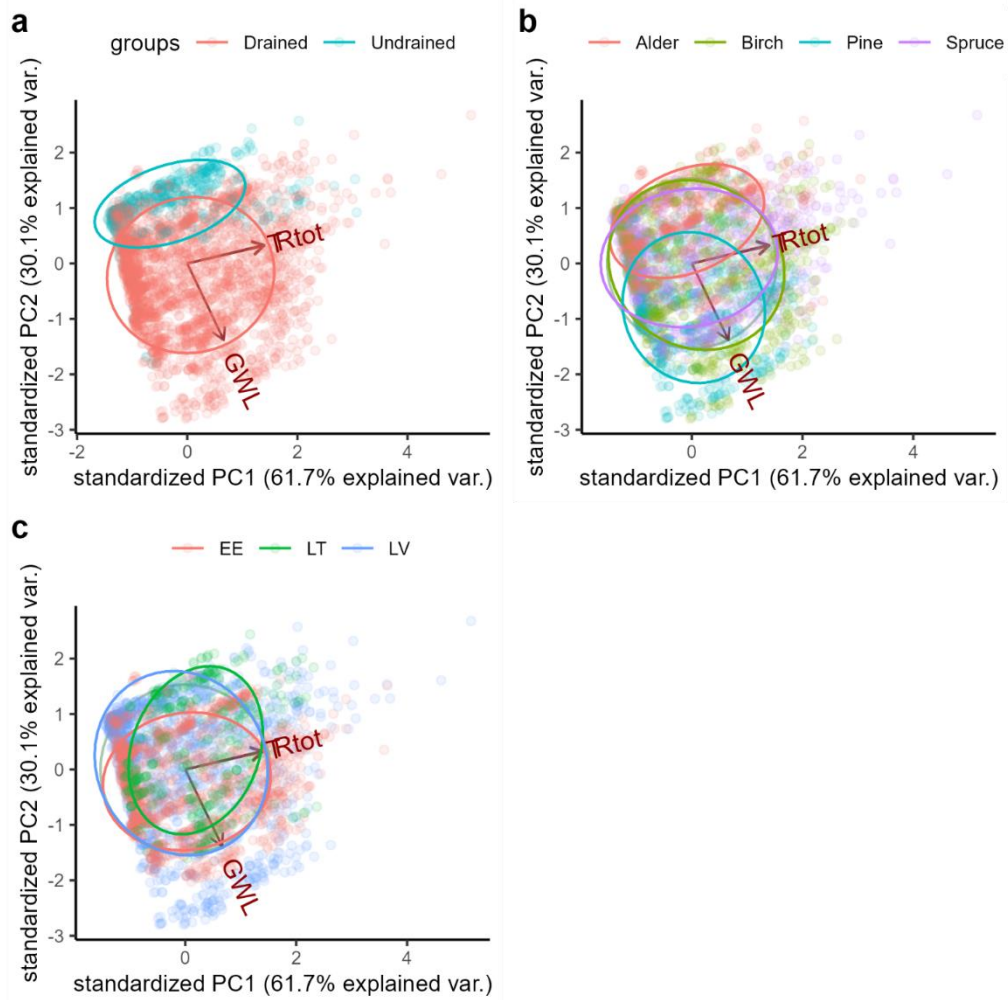

**Figure S 8: PCA of total forest floor respiration (Rtot), soil temperature and WTL data.** In figures a, b, c data are grouped by drainage status, dominant tree species and country, respectively.

20 **Table S 9: Characteristics of linear mixed-effects models predicting total forest floor respiration (Rtot) incorporating a random effect for study site.**

| Fixed effects  | SE    | t-value | p      | AIC  |
|----------------|-------|---------|--------|------|
| T              | 1%    | 76.0    | <0.001 | 7083 |
| T+Drainage     | -20%  | -5.0    | <0.001 | 7067 |
| T+Country      | -210% | -0.8    | 0.49   | 7085 |
| T+Species      | 295%  | 0.3     | 0.73   | 7089 |
| T+WTL category | 14%   | 7.2     | <0.001 | 7035 |
| T+WTL          | 14%   | 7.1     | <0.001 | 7037 |

**Table S 10: Summary of soil C balance (mean $\pm$ CI, t C ha $^{-1}$  year $^{-1}$ ) estimation results. As soil carbon inputs only ground vegetation, fine roots of trees and foliar fine litter is considered.**

| Drainage status | Country | Tree specie | Soil C input    | R <sub>tot</sub> | R <sub>het</sub> | C balance        |                  |
|-----------------|---------|-------------|-----------------|------------------|------------------|------------------|------------------|
|                 |         |             |                 |                  |                  | Forest floor     | Soil             |
| Drained         | EE      | Mean        | 5.33 $\pm$ 3.03 | 5.91 $\pm$ 1.38  | 3.91 $\pm$ 1.08  | -0.58 $\pm$ 3.30 | 1.42 $\pm$ 3.22  |
|                 | LT      |             | 6.06 $\pm$ 3.33 | 5.99 $\pm$ 4.66  | 3.97 $\pm$ 3.63  | 0.07 $\pm$ 5.72  | 2.09 $\pm$ 4.93  |
|                 | LV      |             | 5.28 $\pm$ 0.86 | 6.75 $\pm$ 1.12  | 4.56 $\pm$ 0.87  | -1.47 $\pm$ 1.41 | 0.72 $\pm$ 1.22  |
|                 | Mean    |             | 5.56 $\pm$ 3.35 | 6.22 $\pm$ 4.9   | 4.15 $\pm$ 0.89  | -0.66 $\pm$ 1.92 | 1.41 $\pm$ 1.70  |
|                 | Mean    | Alder       | 5.01 $\pm$ 2.06 | 6.34 $\pm$ 2.45  | 4.24 $\pm$ 1.91  | -1.32 $\pm$ 3.20 | 0.77 $\pm$ 2.81  |
|                 |         | Birch       | 4.44 $\pm$ 0.9  | 6.8 $\pm$ 0.77   | 4.60 $\pm$ 0.60  | -2.36 $\pm$ 1.18 | -0.16 $\pm$ 1.08 |
|                 |         | Pine        | 6.75 $\pm$ 1.92 | 5.23 $\pm$ 0.45  | 3.38 $\pm$ 0.35  | 1.52 $\pm$ 1.97  | 3.37 $\pm$ 1.95  |
|                 |         | Spruce      | 5.41 $\pm$ 1.57 | 6.99 $\pm$ 1.98  | 4.75 $\pm$ 1.54  | -1.58 $\pm$ 3.10 | 0.66 $\pm$ 2.20  |
|                 |         | Mean        | 5.4 $\pm$ 0.82  | 6.34 $\pm$ 1.81  | 4.24 $\pm$ 0.98  | -0.94 $\pm$ 1.99 | 1.16 $\pm$ 2.44  |
| Undrained       | LT      | Mean        | 5.73 $\pm$ 1.73 | 3.51 $\pm$ 1.04  | 2.04 $\pm$ 0.81  | 2.22 $\pm$ -2.02 | 3.69 $\pm$ 1.91  |
|                 | LV      |             | 3.69 $\pm$ 1.04 | 5.24 $\pm$ 1.37  | 3.39 $\pm$ 1.07  | -1.56 $\pm$ 1.72 | 0.30 $\pm$ 1.49  |
|                 | Mean    |             | 4.71 $\pm$ 0.68 | 4.38 $\pm$ 0.33  | 2.72 $\pm$ 1.32  | 0.33 $\pm$ 0.76  | 2.00 $\pm$ 3.32  |
|                 | Mean    | Alder       | 4.57 $\pm$ 1.25 | 5.47 $\pm$ 2.80  | 3.56 $\pm$ 2.18  | -0.9 $\pm$ 2.34  | 1.01 $\pm$ 2.51  |
|                 |         | Birch       | 4.84 $\pm$ 2.49 | 4.25 $\pm$ 2.48  | 2.61 $\pm$ 1.93  | 0.59 $\pm$ 3.75  | 2.23 $\pm$ 3.15  |
|                 |         | Spruce      | 3.7 $\pm$ 1.22  | 4.6 $\pm$ 1.60   | 2.89 $\pm$ 0.57  | -0.90 $\pm$ 1.46 | 0.81 $\pm$ 1.35  |
|                 |         | Mean        | 4.37 $\pm$ 1.81 | 4.77 $\pm$ 2.49  | 3.02 $\pm$ 1.21  | -0.40 $\pm$ 2.14 | 1.35 $\pm$ 1.91  |
