# Supplementary material for: Soil and forest floor carbon balance in drained and undrained hemiboreal peatland forests
Source: Copernicus journal article supplement (doi:10.5194/egusphere-2024-1397), 2024-05-24
Supplement: Supplementary file [file egusphere-2024-1397-AC1-supplement.pdf]

The manuscript by Butlers et al presents a data set of soil CO<sub>2</sub> flux measurements obtained across 26 drained and undrained forested peatland sites in the Baltic states. Fluxes are measured using static chamber methods, and aim to inform the carbon balance according to main tree cover or geographical location (by country) between drained and undrained sites. Additional flux measurements on trenched subplots were intended to provide heterotrophic flux estimates to balance with C inputs, but these data are not used in the analysis.

I found the approach interesting, especially as it enabled a simultaneous analysis of drainage and tree species, which have been found to be linked to C losses in organic soils recently. The comparison by country was less engaging, especially as the main motivation was to define the Baltic region as a distinctive geoclimatic region that contrasts with boreal conditions.

We appreciate your efforts in providing feedback, and your constructive views and recommendations. Concerning the regional versus country-level analysis, the regional values are indeed the main outcome. However, we wish to add the transparency needed for potential use of the results in the national greenhouse gas inventories by also including the country-level results. The local conditions show a clear even if slight climatic gradient and thus it appears relevant to evaluate if this region should be further stratified in scope of emission factor elaboration or whether the region can be treated as uniform enough to apply uniform emission estimation.

Our initial goal was to use the measured heterotrophic respiration data to estimate the C outputs from soil. It is well known that trenching produces an “unnatural” amount of freshly dead root biomass, the decomposition of which is included in the heterotrophic respiration. We measured root biomass in the measurement plots that could be used to account for this “extra” C flux, and initiated a root decomposition experiment. Yet, it turned out that the heterotrophic respiration values were systematically very much higher than the total respiration values, and this could not be remedied by the auxiliary data available. The within-plot variation in root biomass was too high, and the available mass loss data not sufficient, to result in reliable values. Root biomass could not be sampled in the exact locations where the respiration was measured. In principle, such sampling could have been done after the gas flux measurements ended; that would, however, prevent continued flux measurements, which we wish to do to evaluate the duration of the strong root effect. Thus, we chose the more cumbersome, and certainly not perfect (as also discussed) option to use the total soil + ground vegetation respiration data instead. Similar approaches have been used before. Still, we chose to present and discuss also the data on heterotrophic respiration to add transparency, and to further inform the scientific community on potential bias introduced by the method. We are willing to further clarify these issues and our choices both in the Materials and Methods and Discussion sections if considered useful.

The manuscript is very long, and I struggled with the intended focus of it. Rather than building the study around testable hypotheses, it presents a wide range of measurements that are not all relevant to the main objectives. I think that a considerable evaluation of much sharper objectives and specific hypotheses is needed. This will guide the analysis which currently includes measurements that are not used for analysis of findings and results in a wide-ranging, similarly unfocussed discussion.

We very much sympathize with the struggles of the Reviewers. Their task is heavy, as unlike most readers, they are required to read through and thoroughly analyse the paper in full over a short time period. We are, naturally, willing to do our best to clarify the focus of the paper. However, we think that the wide range of measurements presented is a strong asset for the manuscript, and crucial for moving towards better understanding and quantification of forest soil carbon balance and the role of various sources of soil carbon inputs. Such increased understanding is the main purpose of the article, in addition more focused hypotheses are provided. It was recently pointed out (Jauhiainen 2019, 2023; a list of references is provided at the end of our responses) that papers reporting gas fluxes from drained organic forest soils generally fail to present site and environmental data, and/or methodological information, to the extent that it seriously hampers metaanalyses and syntheses that could lead to more accurate dynamic emission factors in the future. Therefore, we believe that the thorough description of the data and results, and the consequent discussion on the findings is necessary for this purpose and relevant for the article, as the details provided give the reader better understanding of specific conditions of the study sites on aspects previous studies are often lacking. We recognize that the article is lengthy, and to make it shorter we could, e.g., revise the approach of how information related to the Rhet measurements are reported. We could leave the most relevant Rhet information in the article and move the further discussion of the issue to the supplementary materials, as the directly measured Rhet results were not used in estimation of the soil C balance. Such way, we would not lose the possibility to provide valuable information to interested readers while making the article shorter. Statistical testing was applied to evaluate aspects the article aimed to (L84-86), for this reason statistical differences of CO<sub>2</sub> emission by countries or dominant tree species were performed. Approaches of descriptive and formal evaluation of hypotheses are described in L266-269. To enhance clarity, we can refine the definitions of the two hypotheses in the Introduction section as follows:

1. The first hypothesis states that annualized soil and forest floor respiration rates do not exhibit statistically significant differences among Estonia, Latvia, and Lithuania.
2. The second hypothesis posits that annualized soil and forest floor respiration rates vary significantly among sites dominated by different tree species.

Unfortunately, there were significant methodological issues that seriously hamper the interpretation of findings. Static chamber methods for CO<sub>2</sub> flux measurements can be problematic, or require careful consideration of the concentration gradient over time. It is well described in the literature that a build-up of CO<sub>2</sub> in the chamber space reduced diffusion-driven soil CO<sub>2</sub> efflux, and these chambers were deployed for extended periods. A non-linear correction is hence likely to be needed, and there are numerous studies that describe methods to do so (see detailed comments below).

We beg to disagree with the assertion that the use of static chambers could have introduced flaws in our study. Prior to field measurements, we conducted comprehensive comparability tests of the methods employed (L482-485). These tests included an evaluation of the linearity of CO<sub>2</sub> concentration increase within the chambers. Simultaneously, we measured CO<sub>2</sub> concentration continuously using an EGM (employed in heterotrophic respiration measurements) and collected manual gas samples for gas chromatography, following the study procedure. Our analysis did not reveal any evidence of disrupted linearity, leading us to conclude that pressure build-up did not introduce bias. Noteworthy, the size of the chambers

used for our  $R_{tot}$  measurements was large (L122-123, a volume of 0.0655 m<sup>3</sup> and an area of 0.196 m<sup>2</sup>), which evidently prevented the formation of nonlinearity. Our team includes scientists with thorough experience in greenhouse gas flux measurements with chamber techniques, and procedures like checking the raw data for linear versus non-linear patterns over time are self-evident for us. We are also quite familiar with the literature dealing with these methodologies.

The static chamber method contrasts with an infrared analyser-based chamber approach for flux measurements in trenched areas. These resulted in higher flux values than static chamber measurements, and are discarded on this basis alone. Small differences in temperature and moisture can not explain this discrepancy, and it is not clear why the IRGA based fluxes were deemed erroneous, and the static flux estimates assumed to be correct.

The decision to discard heterotrophic respiration measurements was based on multiple considerations beyond the observation of higher flux values compared to total (soil and forest floor) respiration (L436-500). These included the impact of trenching on soil temperature, indicated by a diminished correlation between temperature and flux (showing that trenching had affected soil temperature and likely also moisture regime), as well as the decomposition of severed roots, which could potentially increase the heterotrophic respiration by a factor of two judging by the measured root total biomass (L491-500). It was concluded that the overestimation of  $R_{het}$  by root decomposition was the main source of error, as the belowground biomass at the sites was high. Consequently, the root trenching inevitably resulted in significant root decomposition emissions, critically affecting the quality of  $R_{het}$  data and rendering these results unsuitable for use in C balance calculations. We performed several preliminary analyses and comparability tests of both methods (L482-485), which we did not explain in full in the manuscript. By these tests in controlled environment (soil emissions were measured in the laboratory using both sampling methods), it was concluded that the methods are comparable, further strengthening the conclusion of  $R_{het}$  overestimation due to trenching. We can add more justification for our methodological choices if deemed useful, perhaps as Supplementary materials not to further extend the length of the manuscript.

I also missed a more critical engagement with flux results. Maximum values observed are very low for summer conditions, whilst minimum values observed in winter are very high. The constrained range of value across the season is unusual, and authors don't offer any suggestions as to why soil biological activity was maintained at considerable levels in the depth of winter with negligible photosynthetic C supply and likely frozen surface soils where most metabolic activity originates. I suggest that a careful re-analysis of flux estimates is needed, and a careful interrogation of flux responses with more than just temperature.

We can take a closer look at these in a revised version of the manuscript by, e.g., showing seasonality of soil emissions, and looking in more detail into winter emissions. Biological activity in winter is not related to air temperatures only, as, e.g., the emergence and thickness of the snow cover impact the soil temperatures.

The conclusions have to be much more carefully considered, given the considerable sources of uncertainty that the authors present quite openly. The data set may be suitable to derive total soil CO<sub>2</sub> fluxes following a re-analysis, and estimating heterotrophic contributions using literature values may also be informative. But sweeping statements regarding source or sink

functions based on highly uncertain flux estimates and selective use of either boreal or temperate comparison values is not helpful.

In conclusion, I can not recommend the manuscript for publication in its present form. A slimmed down version with a clearer focus on testable hypotheses and a careful re-evaluation of flux estimates maybe worth considering, but this requires a comprehensive revision.

Thank you for noting our commitment to transparency regarding uncertainties in our study. We take utmost seriousness in openly reporting uncertainties and informing readers about any issues they should be aware of. Therefore, we believe that the length and comprehensiveness of the article are justified. Acknowledging the uncertainties, our conclusions are appropriately cautious. We do not assert that the soil carbon stock increased with high confidence; rather, we state that the estimated soil carbon influx and efflux did not definitively indicate a reduction in soil carbon stock within the study sites (L622-623). Utilizing literature values would compromise the study's objective of assessing site-specific carbon balance representing Baltic states. Additionally, employing heterotrophic respiration measurements or literature values would introduce further uncertainty, as discussed both presently and in the article. Therefore, we believe that a full re-analysis is not necessary; however, we will do our best to improve the clarity of the text, including motivation for the choices that were criticized, while shortening and streamlining the actual manuscript by placing some sections in supplementary materials. For instance, the selection of boreal or temperate literature values for comparison is based on the IPCC classification, which places the Baltic states in the temperate zone. Therefore, for GHG inventories in these countries, temperate default emission factors should be applied until higher tier factors are available. However, Kottek et.al. (2006) indicated that most of the area of the Baltic states would rather be in the boreal zone, we will add this reasoning

We appreciate your valuable feedback and understand the concerns raised. We believe that providing clarifications based on the information already included in the article may address most of these concerns without requiring extensive revisions of the paper. Most of the mentioned aspects can be clarified with rather minor technical edits. Our goal is to ensure that the article provides convenient reading while still providing the necessary details for a comprehensive understanding of our study and the results obtained.

35: Other studies exist that present the C balance between heterotrophic C loss from peat and inputs from litter in forested peatlands (Hermans et al 2022).

We agree. The statement is widely accepted knowledge, so we considered that excessive referencing is unnecessary. However, we can include this reference.

54-79: This paragraph gives a lengthy account of technical considerations for C accounting under the IPCC. It does not focus sufficiently on the scientific background and goals of the research. Whilst I appreciate the consideration for harmonised protocols and potential of bias from using contrasting schemes, this should be referenced or presented much more concisely to maintain a focus on the advancement of peatland drainage understanding of C balances per se, not technicalities in its reporting.

We believe that it is crucial to include this information to engage a broader readership, including greenhouse gas inventory specialists, and provide a comprehensive context for them.

While the primary purpose of the article undeniably aims to enhance the scientific understanding of carbon balance, we equally value dedicating attention to the practical application of the findings. This is especially pertinent due to growing concerns among various stakeholders, including policymakers and greenhouse gas inventory compilers, regarding organic soils. We also wish to point out that “ordinary” readers often look for some specific details in papers that they are reviewing, and we would like our paper to be as useful as possible in this respect. We agree that information of scientific relevance of the study is beneficial to the section and we will be happy to expand it. However, we can also move some issues to Supplementary materials, if deemed useful.

84-86: The hypothesis is not statistically testable. Of course, consistent emission factors can be used (tailored or not), but there is no statistical method to accept or refute such a statement. Please present an actual hypothesis (that can be phrased as a null hypothesis, i.e. is statistically testable). As it is presented, the objective seems to be to collect and present emissions data that can be used in future analyses – why is it not being analysed or synthesised here?

The hypothesis is statistically tested by comparing emissions stratified by dominant tree species or countries using pairwise Wilcoxon rank sum tests (L267). Additionally, we assess the significance of the country impact on emissions through mixed-effects models (L260). Yet, we will happily consider sharpening the aims statement and hypotheses following these comments, when revising the manuscript.

The data is analysed here, but with the additional wish that the article provides an extensive amount of data suitable for separate use in future studies or for combining with additional results to synthesize new findings. We advocate for open science principles and, accordingly, we also provide the full data used in carbon balance estimations to enhance its future utilization. We are personally rather frustrated by papers that seem to aim to telling a well-flowing story instead of providing the necessary details to be wider applicable by the scientific community.

104 (Table 1; small detail): Where  $n = 2$ , please just state the respective values separated by comma, rather than “...”, which implies a wider range of values.

Thank you for noting this, we will correct this issue.

120-121: The second sentence of the paragraph seems to repeat the exact information given in the first sentence.

Indeed, thank you for noticing this, the issue will be corrected.

122; Hutchinson and Livingston (1993) describe opaque chamber methods, but you should provide specific detail of your chamber dimensions.

The chamber dimensions are specified in L122-123, with a volume of  $0.0655 \text{ m}^3$  and an area of  $0.196 \text{ m}^2$ . Consequently, the chambers were relatively large, which likely explains why we did not observe the impact of pressure increase on gas concentration, as discussed earlier.

126: Heterotrophic decomposition of soil organic matter (peat) is surely also included!

That is correct, here we simply emphasise that also autotrophic respiration and litter layer decomposition is included. For clarity we will add "...not only soil heterotrophic respiration but also...".

132: 30 or 60-minute sampling intervals will lead to significant build-up of CO<sub>2</sub> in chambers with likely non-linear diffusion flux. Using a simple linear regression is likely to underestimate flux values. See e.g. Kutzbach et al. (2007; *Biogeosciences*, 4(6), pp.1005-1025). The degree of under-estimation is likely to be dependent on the degree of concentration build-up (i.e. flux magnitude).

We believe the concern is resolved by answers provided above.

135: This is not right. An ECD can not detect CO<sub>2</sub>.

ECD can detect CO<sub>2</sub> (e.g. Ferraz-Almeida et.al. (2020), Loftfield (1997, Maier et.al. (2022))

148: Please clarify if the heterotrophic respiration measurements were taken over the same periods and on the same days as the main flux measurements. Why is a different system used for these measurements?

Heterotrophic respiration and total respiration measurements were done during the same study site survey – same day and same time periods. The approach was chosen during the initial harmonisation of methodology between study teams of Estonia, Latvia, and Lithuania lead by colleagues from Finland (LUKE). Final decision was made to use larger chambers (area 0.196 m<sup>2</sup>, volume 0.0655 m<sup>3</sup>) for measuring total respiration with gas chromatograph (measurement time 30 or 60 minutes) and smaller chambers (area 0.07 m<sup>2</sup>, volume 0.017 m<sup>3</sup>) to measure heterotrophic respiration using NDIR (measurement time 3 minutes) to harmonize approaches also with previous studies for comparability reasons. Larger chamber for total respiration is needed to enable entrapment of ground vegetation in the chamber headspace.

212: Not clear: R<sub>het</sub> measurements were made on litter-free soil with no root influence, so you should use different C input values compared to R<sub>tot</sub> calculations.

We would have used different C input values if directly measured R<sub>het</sub> results would have been usable. However, because the used R<sub>het</sub> derived from R<sub>tot</sub> (L224-228) for the reasons discussed earlier, a unified approach for C input values was deemed appropriate to employ.

219-223: Predicting soil C output using abiotic drivers is not trivial. And you have to provide significantly more information regarding the underlying regression used. From Table S6, I gather that you used a linear temperature response, which is unusual, as there is abundant literature to show that respiration follows an exponential temperature response. Soil moisture is an additional factor, and its influence should be investigated in combination with temperature. Potential underestimation bias from the concentration build-up in chambers is likely to affect higher fluxes during warmer conditions more strongly than colder/low flux conditions, resulting in a more linear response.

We fully agree. Initially, three separate approaches were employed to derive regressions: nonlinear, linear after log-transformation, and linear after Box-Cox data transformation (L258-265). The Box-Cox data transformation provided the best prediction (L343-345), hence linear models were deemed appropriate and are presented in Table S6. Previous studies have

indicated that the Box-Cox approach helps mitigate biases introduced by nonlinearity (references at L262, L527). While we believe the derivation of models is transparent, we can clarify in the "Statistical analysis" section that three approaches were initially considered, and the linear fit after Box-Cox transformation was found to be the most suitable. These models were subsequently used for flux interpolation. We acknowledge the importance of soil moisture as discussed in L466-469 and L477-480 and reported in articles referred in L527. However, our study did not include continuous soil moisture measurements to address this issue.

319: You appear to treat each chamber measurement as an independent observation, but as the locations were identical for each plot, you should account for this temporal pseudo-replication by applying repeated-measures statistics.

The locations were not identical but reflect local diversity in vegetation and potentially groundwater levels along the transect of sampling sites (L114). What has traditionally been called pseudo-replication (and sometimes indeed incorrectly utilized) provides in fact critical information of measurement site heterogeneity, and can be utilized.

340-344: Did you attempt to use an exponential response, rather than linear regression?

Linear regressions were applied to transformed data as discussed above. We did try also exponential response, but linear fit after data transformation provided better performance of the models (L343-344).

370-377: It is unclear why there should be any difference in the correlation between  $R_{tot}$  or  $R_{het}$  and different soil parameters, as one is derived directly from the other, so correlations should be equally as strong – or in any case, they are not independent from one another. Figure S6 shows correlation results for sil depths of “0 – 30 cm”, but the text references soil depth of 20-30 cm only.

The keyword here is “measured  $R_{het}$ ” not derived  $R_{het}$ , for this reason the correlations differ. Thank you for noticing this, we will correct the reference by moving it to appropriate location of the paragraph. We will also introduce separate terms for measured and calculated  $R_{het}$  for clarity.

544-546: This is also very unclear. What are “removals” by NEE observed in hemiboreal zones? Provide a reference and make it clear if this refers to a higher rate of NPP. Higher NPP relates to pretty much all ecosystem components, not just litter. And finally: are “ $R_{het}$  C loss” and “ $R_{het}$  rates” not the same flux?

According to Krasnova et al. (2019), NEE tends to be more negative in the hemiboreal zone compared to the boreal zone, indicating net carbon sequestration by the ecosystem. This is likely facilitated by higher net primary productivity (NPP), leading to increased biomass litterfall and consequently higher carbon input into the soil, which counteracts the relatively higher heterotrophic respiration rates observed.

We acknowledge the need for clarity in the statement regarding 'Rhet C loss' and 'Rhet rates'. The intention was to highlight that higher  $R_{het}$  rates in the hemiboreal zone may also be associated with higher NPP. To prevent misunderstandings, we will revise the sentence to: 'One reason for this is the larger removals by net ecosystem exchange observed in the hemiboreal

zone compared to northern forests, ensured by higher gross primary productivity (GPP) (Krasnova et al., 2019), which creates a greater potential for carbon influx through litter to offset soil carbon loss from Rhet.’

597-601: Rather than speculating about whether the public finds results controversial (where is the evidence or motivation for this statement?), you should present robust interpretation of what can be concluded. The figures you cite show fluxes not significantly different from zero, so whilst they don’t support findings of soils being a C source, you can also not present them as a C sink.

Thank you, we will check the phrasing (at least) one more time for this. The uncertainties are reported and allow for the interpretation that while mean carbon balance indicates removals those removals are highly uncertain; therefore we do not conclude that the soil is a sink, we conclude that we did not find evidence for soil C loss, please refer to the section Conclusions. For clarity we can improve the sentence as follows: “The acquired empirical data segregated by drainage status indicated that neither drained nor undrained nutrient rich organic forest soils in Baltic states showed a C source, but rather minor C removals of  $0.9 \pm 1.51 \text{ t C ha}^{-1} \text{ year}^{-1}$  and  $1.19 \pm 1.48 \text{ t C ha}^{-1} \text{ year}^{-1}$ , respectively. Judged further by the uncertainty around the mean values, it can be concluded that the soils appear to be close to C neutral“.

608-610: This is unclear. What is the assumed C stock 100 years ago for this assertion? And why do you apply the temperate emissions factor when otherwise comparing to boreal or hemiboreal conditions in the manuscript

We can consider to either remove the assertion or clarify that for this assertion we assume C stock before drainage was similar to one measured in the undrained sites currently and add reference to studies assessing the C stocks in similar drained and undrained sites in the region. Temperate emission factors are applied due to IPCC guidelines mandating their use in the absence of country-specific factors for the Baltic states, despite evidence indicating that the conditions align more closely with the boreal zone. According to updated KÖPPEN-GEIGER climate classification Baltic States align with boreal zone. Also, previous studies show that soil GHG emissions align more with the ones elaborated in boreal zone rather than in Temperate zone. Consequently, while scientifically it would be more valid to compare Baltic states with boreal zone rather than a temperate zone, in the scope of GHG inventories methodology we are mandated to be compared with temperate zone. For this reason, in specific context, we compare the results also with the temperate emission factors. Such approach underscores the added value of the article, as it promotes a shift from broad regional emission factors to those more appropriate for local conditions, enhancing the accuracy of soil carbon balance predictions.

833 (Figure S4): The units on they-axis seem wrong as values can not represent fluxes in  $\text{mg C m}^{-2} \text{ h}^{-1}$ .

Unit is in  $\ln$  transformed  $\text{mg C m}^{-2} \text{ h}^{-1}$ , we will improve clarity by adding this information also in the caption.



References used:

Alisa Krasnova, Mai Kukumägi, Ülo Mander, Raili Torga, Dmitrii Krasnov, Steffen M. Noe, Ivika Ostonen, Ülle Püttsepp, Helen Killian, Veiko Uri, Krista Lõhmus, Jaak Sõber, Kaido Soosaar. (2019) Carbon exchange in a hemiboreal mixed forest in relation to tree species composition. *Agricultural and Forest Meteorology*, Volume 275, 2019, Pages 11-23, ISSN 0168-1923, <https://doi.org/10.1016/j.agrformet.2019.05.007>

Ferraz-Almeida, R., Spokas, K. A., & De Oliveira, R. C. (2020). Columns and Detectors Recommended in Gas Chromatography to Measure Greenhouse Emission and O<sub>2</sub> Uptake in Soil: A Review. *Communications in Soil Science and Plant Analysis*, 51(5), 582–594. <https://doi.org/10.1080/00103624.2020.1729370>

Jauhiainen, J., Alm, J., Bjarnadottir, B., Callesen, I., Christiansen, J., Clarke, N., Dalsgaard, L., He, H., Jordan, S., Kazanavičiūtė, V., Klemmedtsson, L., Lauren, A., Lazdins, A., Lehtonen, A., Lohila, A., Lupikis, A., Mander, U., Minkkinen, K., Kasimir, ., Olsson, M., Ojanen, P., Oskarsson, H., Sigurdsson, B., Sjøgaard, G., Soosaar, K., Vesterdal, L., & Laiho, R. (2019). Reviews and syntheses: Greenhouse gas exchange data from drained organic forest soils – a review of current approaches and recommendations for future research. *Biogeosciences*, 16(23), 4687–4703.

Jauhiainen, J., Heikkinen, J., Clarke, N., He, H., Dalsgaard, L., Minkkinen, K., Ojanen, P., Vesterdal, L., Alm, J., Butlers, A., Callesen, I., Jordan, S., Lohila, A., Mander, U., Oskarsson, H., Sigurdsson, B., Sjøgaard, G., Soosaar, K., Kasimir, ., Bjarnadottir, B., Lazdins, A., & Laiho, R. (2023). Reviews and syntheses: Greenhouse gas emissions from drained organic forest soils – synthesizing data for site-specific emission factors for boreal and cool temperate regions. *Biogeosciences*, 20(23), 4819–4839.

Kottek, M., J. Grieser, C. Beck, B. Rudolf, and F. Rubel, 2006: World Map of the Köppen-Geiger climate classification updated. *Meteorol. Z.*, 15, 259-263. DOI: 10.1127/0941-2948/2006/0130.

Lofffield, N., Flessa, H., Beese, F., & Augustin, J. (1997). Automated Gas Chromatographic System for Rapid Analysis of the Atmospheric Trace Gases Methane, Carbon Dioxide, and Nitrous Oxide. *Journal of Environmental Quality - J ENVIRON QUAL*, 26, 560-564.

Maier M. *et al.* Introduction of a guideline for measurements of greenhouse gas fluxes from soils using non-steady-state chambers, *J. Plant Nutr. Soil Sci.*, vol. 185, no. 4, 2022, pp. 447–461, DOI: 10.1002/jpln.202200199
